# Supplementary material for: Combination of fluoroalkylation and Kornblum–DeLaMare reaction: a new strategy for the construction of (Z)-β-perfluoroalkyl enaminones
Source: Royal Society of Chemistry journal article supplement (doi:10.1039/c4cc07833k), 2014-11-27

## SUPPORTING INFORMATION

### **Combination of Fluoroalkylation and Kornblum–DeLaMare Rearrangement: A New Strategy for the Construction of (Z)- $\beta$ - Perfluoroalkyl Enaminones with High Selectivity**

**Chunmei Liu, Erbo Shi, Feng Xu, Qiang Luo, Hongxiang Wang, Jijun Chen, and Xiaobing Wan\***

*Key Laboratory of Organic Synthesis of Jiangsu Province, College of Chemistry, Chemical Engineering and Materials  
Science, Soochow University, Suzhou 215123, P. R. China.*

*SABIC Technology Center, Riyadh 11551, Saudi Arabia;*

*wanxb@suda.edu.cn*

|                                              |                         |
|----------------------------------------------|-------------------------|
| <b>General Information .....</b>             | <b>.....P.1</b>         |
| <b>General procedures for reactions.....</b> | <b>.....P.2- P.3</b>    |
| <b>Compound characterizations.....</b>       | <b>.....P.3- P.14</b>   |
| <b>XRD data of the complexe.....</b>         | <b>.....P.15- P.17</b>  |
| <b>Spectroscopic Data for Products.....</b>  | <b>.....P.18- P.101</b> |

#### **General Information**

All manipulations were carried out under air atmosphere. Column chromatography was generally performed on silica gel (300-400 mesh) and reactions were monitored by thin layer chromatography (TLC) using UV light to visualize the course of the reactions. The  $^1\text{H}$  (400 MHz) and  $^{13}\text{C}$  NMR (100 MHz) data were recorded using  $\text{CDCl}_3$  as solvent at room temperature.  $^{19}\text{F}$  NMR (282 MHz) data was recorded using  $\text{CDCl}_3$  as solvent at room temperature. The chemical shifts ( $\delta$ ) are reported in ppm and coupling constants ( $J$ ) in Hz.  $^1\text{H}$  NMR spectra was recorded with tetramethylsilane ( $\delta = 0.00$  ppm) as internal reference;  $^{13}\text{C}$  NMR spectra was recorded with  $\text{CDCl}_3$  ( $\delta = 77.0$  ppm) as internal reference. IR, MS, and HRMS were performed by the State-authorized Analytical Center in Soochow University.

**Table S1.** Optimization of reaction conditions.<sup>[a]</sup>

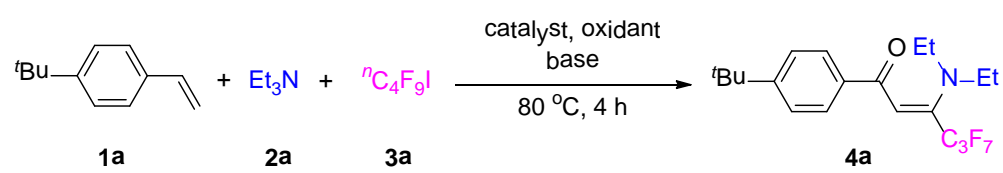

| Entry    | Catalyst                                           | Oxidant                          | Yield      |
|----------|----------------------------------------------------|----------------------------------|------------|
| <b>1</b> | <b>Co(acac)<sub>2</sub></b>                        | <b>TBHP</b>                      | <b>80%</b> |
| 2        | Co(acac) <sub>2</sub>                              | Oxone                            | < 5%       |
| 3        | Co(acac) <sub>2</sub>                              | H <sub>2</sub> O <sub>2</sub>    | < 5%       |
| 4        | Co(acac) <sub>2</sub>                              | DDQ                              | < 5%       |
| 5        | Co(acac) <sub>2</sub>                              | TBPB                             | < 5%       |
| 6        | Co(acac) <sub>2</sub>                              | ( <sup>t</sup> BuO) <sub>2</sub> | < 5%       |
| 7        | Co(acac) <sub>2</sub>                              | —                                | < 5%       |
| 8        | —                                                  | TBHP                             | 26%        |
| 9        | I <sub>2</sub>                                     | TBHP                             | 23%        |
| 10       | TBAI                                               | TBHP                             | 27%        |
| 11       | CAN                                                | TBHP                             | 22%        |
| 12       | [Ru(cymene)Cl <sub>2</sub> ] <sub>2</sub>          | TBHP                             | 60%        |
| 13       | Cu(acac) <sub>2</sub>                              | TBHP                             | 66%        |
| 14       | PdCl <sub>2</sub>                                  | TBHP                             | 25%        |
| 15       | Fe(acac) <sub>2</sub>                              | TBHP                             | 25%        |
| 16       | CoCl <sub>2</sub>                                  | TBHP                             | 31 %       |
| 17       | Co(OAc) <sub>2</sub> ·4H <sub>2</sub> O            | TBHP                             | 40%        |
| 18       | Co(dppf)Cl <sub>2</sub>                            | TBHP                             | 31%        |
| 19       | CoC <sub>2</sub> O <sub>4</sub> ·2H <sub>2</sub> O | TBHP                             | 28%        |
| 20       | Co(acac) <sub>3</sub>                              | TBHP                             | 33%        |

[a] Reaction conditions: 0.5 mmol 1-(*tert*-butyl)-4-vinylbenzene (**1a**), 2.0 equiv triethylamine (**2a**), 2.0 equiv perfluorobutyl iodide (**3a**), 10 mol% catalyst, 5.8 equiv oxidant, 3.0 equiv DABCO, in 2.0 mL CCl<sub>3</sub>CH<sub>3</sub> was stirred at 80 °C for 4 h.

## General procedures for products 4, 5, 6

Styrene (0.5 mmol), amine (1.0 mmol), perfluoroalkyl iodide (1.0 mmol), cobalt(II) acetylacetonate (10 mmol %), DABCO (1.5 mmol) and TBHP (5.8 equiv, 70% aqueous solution, 400 uL) and 2.0 mL CCl<sub>3</sub>CH<sub>3</sub> were added to a tube under air. The reaction mixture was stirred at 80 °C for 4 h. The reaction mixture was quenched with saturated Na<sub>2</sub>SO<sub>3</sub> solution, extracted repeatedly with ethyl acetate, dried over Na<sub>2</sub>SO<sub>4</sub>. It was then removal of the organic solvent in vacuum and followed by flash silica gel column chromatographic purification afforded product with Petroleum ether/Ethyl acetate mixtures.

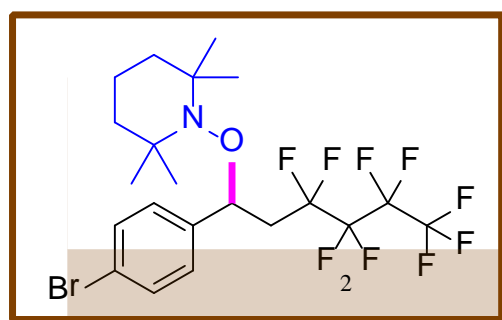

Figure S1. Trap of radical by TEMPO.

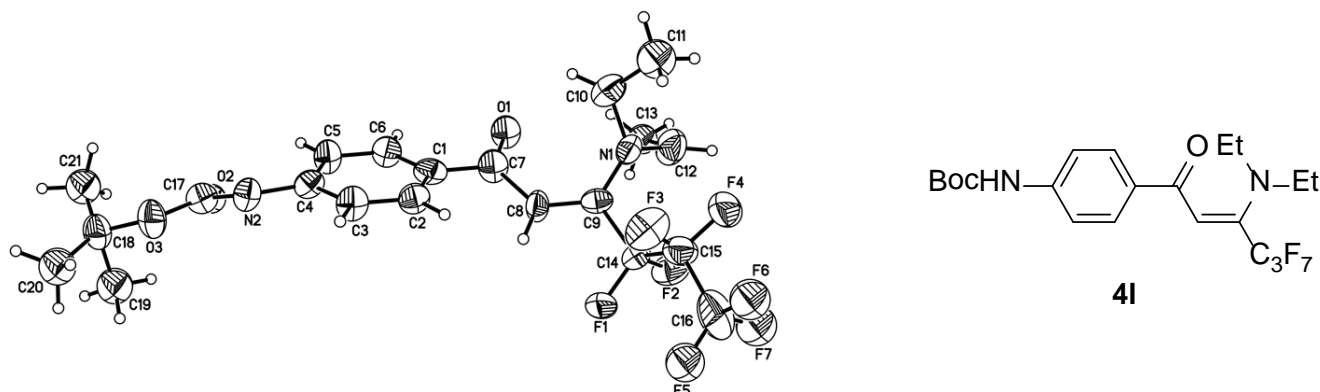

Scheme S1. X-ray crystal structure of product 4l.

## Compound characterizations

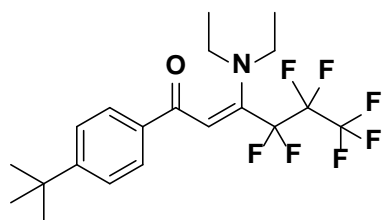

**(Z)-1-(4-(tert-butyl)phenyl)-3-(diethylamino)-4,4,5,5,6,6,6-heptafluorohex-2-en-1-one (4a).**  $^1\text{H}$  NMR (400 MHz,  $\text{CDCl}_3$ )  $\delta$  7.86 (d,  $J = 8.3$  Hz, 2H), 7.48 (d,  $J = 8.3$  Hz, 2H), 6.48 (s, 1H), 3.24 (q,  $J = 7.0$  Hz, 4H), 1.34 (s, 9H), 1.10 (t,  $J = 7.1$  Hz, 6H);  $^{13}\text{C}$  NMR (100 MHz,  $\text{CDCl}_3$ )  $\delta$  186.8, 156.0, 146.1, 136.5, 128.1, 125.5, 106.4 (t,  $J = 6.5$  Hz), 47.1, 35.0, 31.0, 13.1 Carbons corresponding to  $\text{C}_3\text{F}_7$  group can not be identified due to C-F coupling;  $^{19}\text{F}$  NMR (282 MHz,  $\text{CDCl}_3$ )  $\delta$  -80.46 (t,  $J = 10.2$  Hz, 3F), -108.34--108.45 (m, 2F), -125.45--125.55 (m, 2F). HRMS: Anal. Calcd. For  $\text{C}_{20}\text{H}_{24}\text{F}_7\text{NONa}$ : 450.1644, Found: 450.1656. IR (KBr,  $\text{cm}^{-1}$ ):  $\nu$  1646, 1451, 1404, 1383, 1341, 1253.

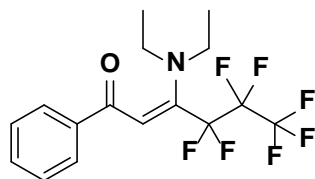

**(Z)-3-(diethylamino)-4,4,5,5,6,6,6-heptafluoro-1-phenylhex-2-en-1-one (4b).**  $^1\text{H}$  NMR (400 MHz,  $\text{CDCl}_3$ )  $\delta$  7.90 (d,  $J = 7.5$  Hz, 2H), 7.54-7.50 (m, 1H), 7.47-7.44 (m, 2H), 6.46 (s, 1H), 3.26 (q,  $J = 6.9$  Hz, 4H), 1.11 (t,  $J = 7.0$  Hz, 6H);  $^{13}\text{C}$  NMR (100 MHz,  $\text{CDCl}_3$ )  $\delta$  186.9, 146.5, 139.2, 132.2,

128.5, 128.1, 105.7(t,  $J=6.2$  Hz), 47.3, 13.1 Carbons corresponding to  $C_3F_7$  group can not be identified due to C-F coupling;  $^{19}F$  NMR (282 MHz,  $CDCl_3$ )  $\delta$  -80.50 (t,  $J = 10.2$  Hz, 3F), -108.26--108.37 (m, 2F), -125.43--125.53 (m, 2F). MS: Anal. Calcd. For  $C_{16}H_{17}F_7NO$ : 372, Found: 372 ( $M+1^+$ ). IR (KBr,  $cm^{-1}$ ):  $\nu$  1641, 1450, 1401, 1384, 1343, 1232.

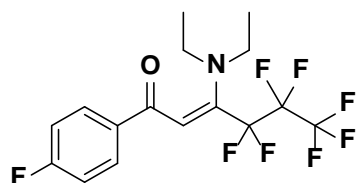

**(Z)-3-(diethylamino)-4,4,5,5,6,6,6-heptafluoro-1-(4-fluorophenyl)hex-2-en-1-one (4c).**

$^1H$  NMR (400 MHz,  $CDCl_3$ )  $\delta$  7.94-7.91 (m, 2H), 7.14-7.10 (m, 2H), 6.41 (s, 1H), 3.21 (q,  $J = 7.1$  Hz, 4H), 1.11 (t,  $J = 7.1$  Hz, 6H);  $^{13}C$  NMR (100 MHz,  $CDCl_3$ )  $\delta$  185.2, 166.5, 163.9, 146.7, 135.5, 130.6, 130.6, 115.6, 115.4, 105.0 (t,  $J=6.4$  Hz), 47.3, 13.1 Carbons corresponding to  $C_3F_7$  group can not be identified due to C-F coupling;  $^{19}F$  NMR (282 MHz,  $CDCl_3$ )  $\delta$  -80.38 (t,  $J = 10.3$  Hz, 3F), -106.79--106.89 (m, 1F), -108.15--108.26 (m, 2F), -125.32--125.42 (m, 2F). MS: Anal. Calcd. For  $C_{16}H_{16}F_8NO$ : 390, Found: 390 ( $M+1^+$ ). IR (KBr,  $cm^{-1}$ ):  $\nu$  1640, 1454, 1413, 1383, 1338, 1232.

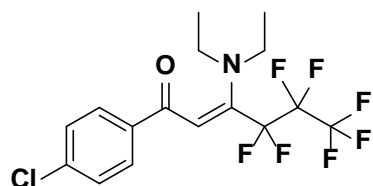

**(Z)-1-(4-chlorophenyl)-3-(diethylamino)-4,4,5,5,6,6,6-heptafluorohex-2-en-1-one (4d).**

$^1H$  NMR (400 MHz,  $CDCl_3$ )  $\delta$  7.84 (d,  $J = 8.4$  Hz, 2H), 7.42 (d,  $J = 8.3$  Hz, 2H), 6.39 (s, 1H), 3.28 (q,  $J = 7.0$  Hz, 4H), 1.12 (t,  $J = 7.1$  Hz, 6H);  $^{13}C$  NMR (100 MHz,  $CDCl_3$ )  $\delta$  185.2, 146.9, 138.5, 137.6, 129.5, 128.7, 104.3 (t,  $J=6.5$  Hz), 47.4, 13.2 Carbons corresponding to  $C_3F_7$  group can not be identified due to C-F coupling;  $^{19}F$  NMR (282 MHz,  $CDCl_3$ )  $\delta$  -80.40 (t,  $J = 10.3$  Hz, 3F), -108.10--108.21 (m, 2F), -125.31--125.40 (m, 2F). HRMS: Anal. Calcd. For  $C_{16}H_{16}^{35}ClF_7NO$ : 406.0809,  $C_{16}H_{16}^{37}ClF_7NO$ : 408.0779, Found: 406.0815 ( $M+1^+$ ), ( $^{35}Cl$ ), , 408.0788 ( $M+1^+$ ), ( $^{37}Cl$ ). IR (KBr,  $cm^{-1}$ ):  $\nu$  1647, 1453, 1405, 1386, 1330, 1240.

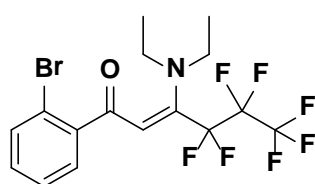

**(Z)-1-(2-bromophenyl)-3-(diethylamino)-4,4,5,5,6,6,6-heptafluorohex-2-en-1-one (4e).**

$^1\text{H}$  NMR (400 MHz,  $\text{CDCl}_3$ )  $\delta$  7.59 (d,  $J = 7.9$  Hz, 1H), 7.50 (d,  $J = 7.6$  Hz, 1H), 7.36 (t,  $J = 7.5$  Hz, 1H), 7.27 (t,  $J = 7.6$  Hz, 1H), 6.11 (s, 1H), 3.38 (q,  $J = 7.0$  Hz, 4H), 1.18 (t,  $J = 7.0$  Hz, 6H);  $^{13}\text{C}$  NMR (100 MHz,  $\text{CDCl}_3$ )  $\delta$  187.5, 146.3, 142.7, 133.4, 131.3, 129.7, 127.4, 119.7, 107.6 (t,  $J = 6.7$  Hz), 47.6, 13.6 Carbons corresponding to  $\text{C}_3\text{F}_7$  group can not be identified due to C-F coupling;  $^{19}\text{F}$  NMR (282 MHz,  $\text{CDCl}_3$ )  $\delta$  -80.41 (t,  $J = 10.2$  Hz, 3F), -108.08--108.19 (m, 2F), -125.22--125.31 (m, 2F). MS: Anal. Calcd. For  $\text{C}_{16}\text{H}_{16}^{79}\text{BrF}_7\text{NO}$ : 450,  $\text{C}_{16}\text{H}_{16}^{81}\text{BrF}_7\text{NO}$ : 452, Found: 450 ( $\text{M}+1^+$ ), ( $^{79}\text{Br}$ ), 452 ( $\text{M}+1^+$ ), ( $^{81}\text{Br}$ ). IR (KBr,  $\text{cm}^{-1}$ ):  $\nu$  1642, 1451, 1407, 1383, 1342, 1270.

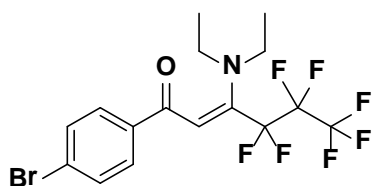

**(Z)-1-(4-bromophenyl)-3-(diethylamino)-4,4,5,5,6,6,6-heptafluorohex-2-en-1-one (4f).**

$^1\text{H}$  NMR (400 MHz,  $\text{CDCl}_3$ )  $\delta$  7.76 (d,  $J = 8.6$  Hz, 2H), 7.59 (d,  $J = 8.6$  Hz, 2H), 6.38 (s, 1H), 3.28 (q,  $J = 7.0$  Hz, 4H), 1.11 (t,  $J = 7.1$  Hz, 6H);  $^{13}\text{C}$  NMR (100 MHz,  $\text{CDCl}_3$ )  $\delta$  185.3, 146.9, 138.0, 131.7, 129.6, 127.1, 104.3 (t,  $J = 6.3$  Hz), 47.4, 13.2 Carbons corresponding to  $\text{C}_3\text{F}_7$  group can not be identified due to C-F coupling;  $^{19}\text{F}$  NMR (282 MHz,  $\text{CDCl}_3$ )  $\delta$  -80.37 (t,  $J = 10.3$  Hz, 3F), -108.06--108.17 (m, 2F), -125.27--125.37 (m, 2F). MS: Anal. Calcd. For  $\text{C}_{16}\text{H}_{16}^{79}\text{BrF}_7\text{NO}$ : 450,  $\text{C}_{16}\text{H}_{16}^{81}\text{BrF}_7\text{NO}$ : 452, Found: 450 ( $\text{M}+1^+$ ), ( $^{79}\text{Br}$ ), 452 ( $\text{M}+1^+$ ), ( $^{81}\text{Br}$ ). IR (KBr,  $\text{cm}^{-1}$ ):  $\nu$  1647, 1454, 1409, 1383, 1340, 1273.

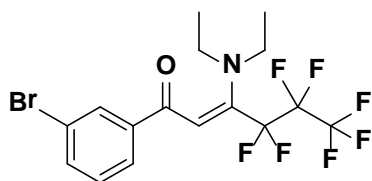

**(Z)-1-(3-bromophenyl)-3-(diethylamino)-4,4,5,5,6,6,6-heptafluorohex-2-en-1-one (4g).**

$^1\text{H}$  NMR (400 MHz,  $\text{CDCl}_3$ )  $\delta$  8.03 (s, 1H), 7.80 (d,  $J = 7.7$  Hz, 1H), 7.64 (d,  $J = 7.8$  Hz, 1H), 7.33 (t,  $J = 7.8$  Hz, 1H), 6.36 (s, 1H), 3.29 (q,  $J = 6.9$  Hz, 4H), 1.12 (t,  $J = 7.0$  Hz, 6H);  $^{13}\text{C}$  NMR (100 MHz,  $\text{CDCl}_3$ )  $\delta$  184.7, 147.3, 141.1, 134.9, 131.1, 130.0, 126.6, 122.8, 103.8 (t,  $J = 6.4$  Hz), 47.5, 13.2 Carbons corresponding to  $\text{C}_3\text{F}_7$  group can not be identified due to C-F coupling;  $^{19}\text{F}$  NMR (282 MHz,  $\text{CDCl}_3$ )  $\delta$  -80.34 (t,  $J = 10.3$  Hz, 3F), -108.00--108.11 (m, 2F), -125.22--125.32 (m, 2F). HRMS: Anal. Calcd. For  $\text{C}_{16}\text{H}_{16}^{79}\text{BrF}_7\text{NO}$ : 450.0303,  $\text{C}_{16}\text{H}_{16}^{81}\text{BrF}_7\text{NO}$ : 452.0283, Found: 450.0285 ( $\text{M}+1^+$ ), ( $^{79}\text{Br}$ ), 452.0271 ( $\text{M}+1^+$ ), ( $^{81}\text{Br}$ ). IR (KBr,  $\text{cm}^{-1}$ ):  $\nu$  1647, 1454, 1408, 1383, 1339, 1274.

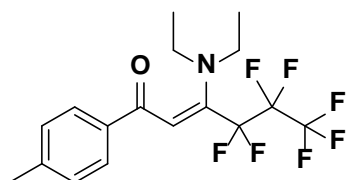

**(Z)-3-(diethylamino)-4,4,5,5,6,6,6-heptafluoro-1-(p-tolyl)hex-2-en-1-one (4h).**  $^1\text{H}$  NMR (400 MHz,  $\text{CDCl}_3$ )  $\delta$  7.80 (d,  $J = 7.5$  Hz, 2H), 7.26 (d,  $J = 7.2$  Hz, 2H), 6.45 (s, 1H), 3.23 (q,  $J = 6.9$  Hz, 4H), 2.41 (s, 3H), 1.10 (t,  $J = 7.0$  Hz, 6H);  $^{13}\text{C}$  NMR (100 MHz,  $\text{CDCl}_3$ )  $\delta$  186.8, 146.1, 143.0, 136.5, 129.2, 128.3, 106.4 (t,  $J = 6.7$  Hz), 47.2, 21.5, 13.1 Carbons corresponding to  $\text{C}_3\text{F}_7$  group can not be identified due to C-F coupling;  $^{19}\text{F}$  NMR (282 MHz,  $\text{CDCl}_3$ )  $\delta$  -80.41 (t,  $J = 10.1$  Hz, 3F), -108.30--108.40 (m, 2F), -125.40--125.49 (m, 2F). MS: Anal. Calcd. For  $\text{C}_{17}\text{H}_{19}\text{F}_7\text{NO}$ : 386, Found: 386 ( $\text{M}+1^+$ ). IR (KBr,  $\text{cm}^{-1}$ ):  $\nu$  1638, 1450, 1406, 1384, 1341, 1273.

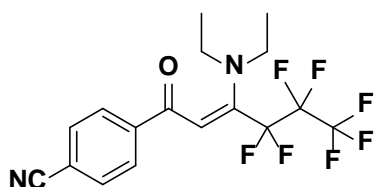

**(Z)-4-(3-(diethylamino)-4,4,5,5,6,6,6-heptafluorohex-2-enoyl)benzonitrile (4i).**  $^1\text{H}$  NMR (400 MHz,  $\text{CDCl}_3$ )  $\delta$  7.98 (d,  $J = 8.0$  Hz, 2H), 7.77 (d,  $J = 8.0$  Hz, 2H), 6.35 (s, 1H), 3.35 (q,  $J = 7.0$  Hz, 4H), 1.15 (t,  $J = 7.1$  Hz, 6H);  $^{13}\text{C}$  NMR (100 MHz,  $\text{CDCl}_3$ )  $\delta$  183.9, 147.9, 142.7, 132.3, 128.4, 118.2, 115.1, 102.4 (t,  $J = 6.7$  Hz), 47.8, 13.3 Carbons corresponding to  $\text{C}_3\text{F}_7$  group can not be identified due to C-F coupling;  $^{19}\text{F}$  NMR (282 MHz,  $\text{CDCl}_3$ )  $\delta$  -80.31 (t,  $J = 10.3$  Hz, 3F), -107.85--107.96 (m, 2F), -125.11--125.21 (m, 2F). MS: Anal. Calcd. For  $\text{C}_{17}\text{H}_{16}\text{F}_7\text{N}_2\text{O}$ : 397, Found: 397 ( $\text{M}+1^+$ ). IR (KBr,  $\text{cm}^{-1}$ ):  $\nu$  1638, 1449, 1402, 1384, 1350, 1230.

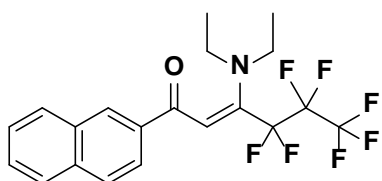

**(Z)-3-(diethylamino)-4,4,5,5,6,6,6-heptafluoro-1-(naphthalen-2-yl)hex-2-en-1-one (4j).**  $^1\text{H}$  NMR (400 MHz,  $\text{CDCl}_3$ )  $\delta$  8.37 (s, 1H), 8.01 (d,  $J = 8.6$  Hz, 1H), 7.94 (d,  $J = 7.8$  Hz, 1H), 7.88-7.83 (m, 2H), 7.56-7.49 (m, 2H), 6.63 (s, 1H), 3.29 (q,  $J = 7.0$  Hz, 4H), 1.12 (t,  $J = 7.1$  Hz, 6H);  $^{13}\text{C}$  NMR (100 MHz,  $\text{CDCl}_3$ )  $\delta$  186.7, 146.5, 136.5, 135.2, 132.5, 129.5, 129.4, 128.4, 128.1, 127.7, 126.6, 124.2, 105.9 (t,  $J = 6.4$  Hz), 47.3, 13.1 Carbons corresponding to  $\text{C}_3\text{F}_7$  group can not be identified due to C-F coupling;  $^{19}\text{F}$  NMR (282 MHz,  $\text{CDCl}_3$ )  $\delta$  -80.29 (t,  $J = 10.3$  Hz, 3F), -108.08--108.19 (m, 2F), -125.22--

125.32 (m, 2F). HRMS: Anal. Calcd. For  $C_{20}H_{19}F_7NO$ : 422.1355, Found: 422.1362 ( $M+1^+$ ). IR (KBr,  $cm^{-1}$ ):  $\nu$  1639, 1454, 1410, 1383, 1334, 1274.

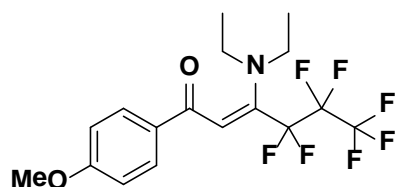

**(Z)-3-(diethylamino)-4,4,5,5,6,6,6-heptafluoro-1-(4-fluorophenyl)hex-2-en-1-one (4k).**

$^1H$  NMR (400 MHz,  $CDCl_3$ )  $\delta$  7.90 (d,  $J = 8.8$  Hz, 2H), 6.94 (d,  $J = 8.8$  Hz, 2H), 6.46 (s, 1H), 3.85 (s, 3H), 3.22 (q,  $J = 7.0$  Hz, 4H), 1.09 (t,  $J = 7.1$  Hz, 6H);  $^{13}C$  NMR (100 MHz,  $CDCl_3$ )  $\delta$  186.1, 162.9, 145.8, 132.0, 130.3, 113.6, 106.9 (t,  $J = 6.1$  Hz), 55.3, 47.0, 13.0 Carbons corresponding to  $C_3F_7$  group can not be identified due to C-F coupling;  $^{19}F$  NMR (282 MHz,  $CDCl_3$ )  $\delta$  -80.45 (t,  $J = 10.2$  Hz, 3F), -108.42--108.53 (m, 2F), -125.46--125.55 (m, 2F). HRMS: Anal. Calcd. For  $C_{17}H_{19}F_7NO_2$ : 402.1304, Found: 402.1273 ( $M+1^+$ ). IR (KBr,  $cm^{-1}$ ):  $\nu$  1644, 1451, 1408, 1384, 1341, 1250.

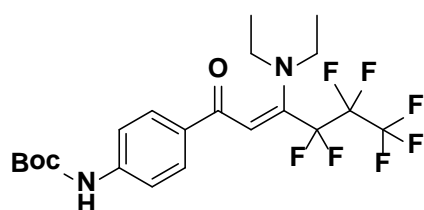

**(Z)-tert-butyl (4-(3-(diethylamino)-4,4,5,5,6,6,6-heptafluorohex-2-enoyl)phenyl)carbamate (4l).**

$^1H$  NMR (400 MHz,  $CDCl_3$ )  $\delta$  7.86 (d,  $J = 8.2$  Hz, 2H), 7.51 (d,  $J = 8.1$  Hz, 2H), 7.30 (s, 1H), 6.46 (s, 1H), 3.23 (q,  $J = 6.8$  Hz, 4H), 1.50 (s, 9H), 1.09 (t,  $J = 6.9$  Hz, 6H);  $^{13}C$  NMR (100 MHz,  $CDCl_3$ )  $\delta$  186.1, 152.4, 146.0, 142.6, 133.4, 129.5, 117.5, 106.2 (t,  $J = 6.6$  Hz), 80.9, 47.1, 28.1, 13.0 Carbons corresponding to  $C_3F_7$  group can not be identified due to C-F coupling;  $^{19}F$  NMR (282 MHz,  $CDCl_3$ )  $\delta$  -80.44 (t,  $J = 10.2$  Hz, 3F), -108.33--108.44 (m, 2F), -125.43--125.52 (m, 2F). HRMS: Anal. Calcd. For  $C_{21}H_{26}F_7N_2O_3$ : 487.1832, Found: 487.1801 ( $M+1^+$ ). IR (KBr,  $cm^{-1}$ ):  $\nu$  1647, 1450, 1406, 1383, 1339, 1279.

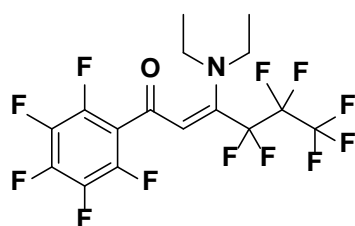

**(Z)-3-(diethylamino)-4,4,5,5,6,6,6-heptafluoro-1-(perfluorophenyl)hex-2-en-1-one**

**(4m).**  $^1\text{H}$  NMR (400 MHz,  $\text{CDCl}_3$ )  $\delta$  5.89 (s, 1H), 3.46 (q,  $J = 7.0$  Hz, 4H), 1.19 (t,  $J = 7.0$  Hz, 6H);  $^{13}\text{C}$  NMR (100 MHz,  $\text{CDCl}_3$ )  $\delta$  175.5, 147.7, 105.0 (t,  $J = 6.4$  Hz), 48.5, 13.2 Carbons corresponding to  $\text{C}_3\text{F}_7$  group can not be identified due to C-F coupling;  $^{19}\text{F}$  NMR (282 MHz,  $\text{CDCl}_3$ )  $\delta$  -80.35 (t,  $J = 10.2$  Hz, 3F), -108.00--108.10 (m, 2F), -124.94--125.03 (m, 2F), -142.07--142.19 (m, 2F), -151.93--152.08 (m, 1F), -160.76--160.94 (m, 2F). MS: Anal. Calcd. For  $\text{C}_{16}\text{H}_{12}\text{F}_{12}\text{NO}$ : 462, Found: 462 ( $\text{M}+1^+$ ). IR (KBr,  $\text{cm}^{-1}$ ):  $\nu$  1648, 1450, 1409, 1383, 1338, 1273.

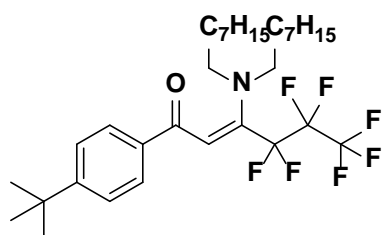

**(Z)-1-(4-(tert-butyl)phenyl)-3-(dioctylamino)-4,4,5,5,6,6,6-heptafluorohex-2-en-1-one**

**(5a).**  $^1\text{H}$  NMR (400 MHz,  $\text{CDCl}_3$ )  $\delta$  7.85 (d,  $J = 8.2$  Hz, 2H), 7.47 (d,  $J = 8.2$  Hz, 2H), 6.41 (s, 1H), 3.17 (t,  $J = 7.4$  Hz, 4H), 1.56-1.50 (m, 4H), 1.34 (s, 9H), 1.27-1.20 (m, 20H), 0.86 (t,  $J = 6.6$  Hz, 6H);  $^{13}\text{C}$  NMR (100 MHz,  $\text{CDCl}_3$ )  $\delta$  186.4, 155.7, 146.9, 136.8, 128.1, 125.4, 104.7 (t,  $J = 5.8$  Hz), 53.2, 35.0, 31.7, 31.1, 29.2, 29.2, 27.8, 26.7, 22.6, 14.0. Carbons corresponding to  $\text{C}_3\text{F}_7$  group can not be identified due to C-F coupling;  $^{19}\text{F}$  NMR (282 MHz,  $\text{CDCl}_3$ )  $\delta$  -80.31 (t,  $J = 10.4$  Hz, 3F), -107.01--107.12 (m, 2F), -124.95--125.04 (m, 2F). HRMS: Anal. Calcd. For  $\text{C}_{32}\text{H}_{49}\text{NOF}_7$ : 596.3702, Found: 596.3683 ( $\text{M}+1^+$ ). IR (KBr,  $\text{cm}^{-1}$ ):  $\nu$  1647, 1464, 1400, 1385, 1340, 1230.

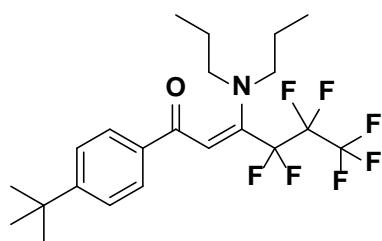

**(Z)-1-(4-(tert-butyl)phenyl)-3-(dipropylamino)-4,4,5,5,6,6,6-heptafluorohex-2-en-1-one**

**(5b).**  $^1\text{H}$  NMR (400 MHz,  $\text{CDCl}_3$ )  $\delta$  7.86 (d,  $J = 8.2$  Hz, 2H), 7.48 (d,  $J = 8.2$  Hz, 2H), 6.43 (s, 1H), 3.16 (t,  $J = 7.0$  Hz, 4H), 1.62-1.55 (m, 4H), 1.34 (s, 9H), 0.85 (t,  $J = 7.3$  Hz, 6H);  $^{13}\text{C}$  NMR (100 MHz,  $\text{CDCl}_3$ )  $\delta$  186.4, 155.7, 147.2, 136.8, 128.0, 125.4, 104.5 (t,  $J = 7.0$  Hz), 54.7, 34.9, 31.0, 21.0, 11.0 Carbons corresponding to  $\text{C}_3\text{F}_7$  group can not be identified due to C-F coupling;  $^{19}\text{F}$  NMR (282 MHz,  $\text{CDCl}_3$ )  $\delta$  -80.46 (t,  $J = 10.4$  Hz, 3F), -106.87--106.98 (m, 2F), -125.10--125.19 (m, 2F). MS: Anal. Calcd. For  $\text{C}_{22}\text{H}_{29}\text{F}_7\text{NO}$ : 456, Found: 456 ( $\text{M}+1^+$ ). IR (KBr,  $\text{cm}^{-1}$ ):  $\nu$  1639, 1455, 1416, 1383, 1333, 1274.



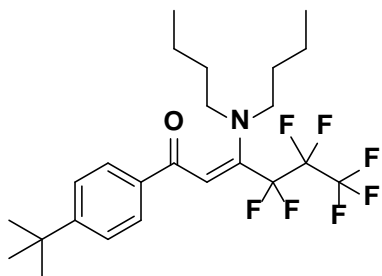

**(Z)-1-(4-(tert-butyl)phenyl)-3-(dibutylamino)-4,4,5,5,6,6,6-heptafluorohex-2-en-1-one (5c).**  $^1\text{H}$  NMR (400 MHz,  $\text{CDCl}_3$ )  $\delta$  7.86 (d,  $J = 7.9$  Hz, 2H), 7.48 (d,  $J = 8.0$  Hz, 2H), 6.42 (s, 1H), 3.18 (t,  $J = 7.3$  Hz, 4H), 1.57-1.49 (m, 4H), 1.34 (s, 9H), 1.29-1.23 (m, 4H), 0.88 (t,  $J = 7.3$  Hz, 6H);  $^{13}\text{C}$  NMR (100 MHz,  $\text{CDCl}_3$ )  $\delta$  186.4, 155.7, 147.1, 136.8, 128.0, 125.4, 104.6 (t,  $J = 6.8$  Hz), 52.9, 35.0, 31.1, 29.9, 19.8, 13.7 Carbons corresponding to  $\text{C}_3\text{F}_7$  group can not be identified due to C-F coupling;  $^{19}\text{F}$  NMR (282 MHz,  $\text{CDCl}_3$ )  $\delta$  -80.43 (t,  $J = 10.4$  Hz, 3F), -107.05--107.17 (m, 2F), -125.08--125.18 (m, 2F). HRMS: Anal. Calcd. For  $\text{C}_{24}\text{H}_{33}\text{F}_7\text{NO}$ : 484.2450, Found: 484.2451 ( $\text{M}+1^+$ ). IR (KBr,  $\text{cm}^{-1}$ ):  $\nu$  1638, 1454, 1414, 1383, 1332, 1274.

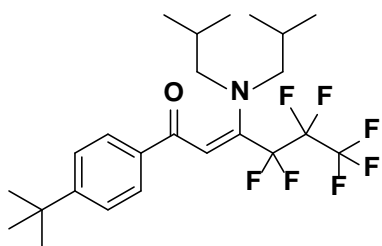

**(Z)-1-(4-(tert-butyl)phenyl)-3-(diisobutylamino)-4,4,5,5,6,6,6-heptafluorohex-2-en-1-one (5d).**  $^1\text{H}$  NMR (400 MHz,  $\text{CDCl}_3$ )  $\delta$  7.86 (d,  $J = 8.5$  Hz, 2H), 7.47 (d,  $J = 8.5$  Hz, 2H), 6.35 (s, 1H), 3.03 (d,  $J = 6.6$  Hz, 4H), 2.01-1.94 (m, 2H), 1.34 (s, 9H), 0.87 (d,  $J = 6.7$  Hz, 12H);  $^{13}\text{C}$  NMR (100 MHz,  $\text{CDCl}_3$ )  $\delta$  185.8, 155.5, 147.6, 137.2, 127.9, 125.4, 102.0 (t,  $J = 5.5$  Hz), 60.8, 34.9, 31.1, 26.1, 19.9 Carbons corresponding to  $\text{C}_3\text{F}_7$  group can not be identified due to C-F coupling;  $^{19}\text{F}$  NMR (282 MHz,  $\text{CDCl}_3$ )  $\delta$  -80.21 (t,  $J = 10.8$  Hz, 3F), -104.38--104.48 (m, 2F), -123.79--123.88 (m, 2F). MS: Anal. Calcd. For  $\text{C}_{24}\text{H}_{33}\text{F}_7\text{NO}$ : 484, Found: 484 ( $\text{M}+1^+$ ). IR (KBr,  $\text{cm}^{-1}$ ):  $\nu$  1638, 1454, 1401, 1384, 1338, 1273.

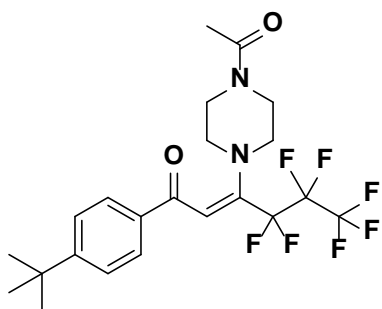

**(Z)-3-(4-acetylpiperazin-1-yl)-1-(4-(tert-butyl)phenyl)-4,4,5,5,6,6,6-heptafluorohex-2-en-1-one (5e).**  $^1\text{H}$  NMR (400 MHz,  $\text{CDCl}_3$ )  $\delta$  7.84 (d,  $J = 8.3$  Hz, 2H), 7.51 (d,  $J = 8.3$  Hz, 2H), 6.60 (s, 1H), 3.64-3.61 (m, 2H), 3.50-3.48 (m, 2H), 3.09-3.07 (m, 4H), 2.09 (s, 3H), 1.35 (s, 9H);  $^{13}\text{C}$  NMR (100 MHz,  $\text{CDCl}_3$ )  $\delta$  188.4, 168.8, 157.0, 146.1 (t,  $J = 23$  Hz), 135.2, 128.3, 125.6, 112.5 (t,  $J = 5.0$  Hz), 51.6, 50.8, 45.9, 41.0, 35.0, 30.8, 21.0 Carbons corresponding to  $\text{C}_3\text{F}_7$  group can not be identified due to C-F coupling;  $^{19}\text{F}$  NMR (282 MHz,  $\text{CDCl}_3$ )  $\delta$  -80.43 (t,  $J = 9.5$  Hz, 3F), -110.49--110.59 (m, 2F), -125.43--125.51 (m, 2F). HRMS: Anal. Calcd. For  $\text{C}_{22}\text{H}_{25}\text{F}_7\text{N}_2\text{O}_2\text{Na}$ : 505.1702, Found: 505.1701. IR (KBr,  $\text{cm}^{-1}$ ):  $\nu$  1655, 1458, 1426, 1385, 1343, 1229.

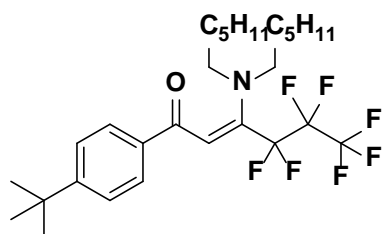

**(Z)-1-(4-(tert-butyl)phenyl)-3-(dihexylamino)-4,4,5,5,6,6,6-heptafluorohex-2-en-1-one (5f).**  $^1\text{H}$  NMR (400 MHz,  $\text{CDCl}_3$ )  $\delta$  7.83 (d,  $J = 8.4$  Hz, 2H), 7.46 (d,  $J = 8.5$  Hz, 2H), 6.39 (s, 1H), 3.15 (t,  $J = 7.6$  Hz, 4H), 1.55-1.49 (m, 4H), 1.33 (s, 9H), 1.25-1.20 (m, 12H), 0.83 (t,  $J = 6.8$  Hz, 6H);  $^{13}\text{C}$  NMR (100 MHz,  $\text{CDCl}_3$ )  $\delta$  186.4, 155.7, 146.9, 136.8, 128.0, 125.4, 104.7 (t,  $J = 6.8$  Hz), 53.2, 35.0, 31.4, 31.1, 27.8, 26.3, 22.5, 13.9 Carbons corresponding to  $\text{C}_3\text{F}_7$  group can not be identified due to C-F coupling;  $^{19}\text{F}$  NMR (282 MHz,  $\text{CDCl}_3$ )  $\delta$  -80.30 (t,  $J = 10.5$  Hz, 3F), -107.02--107.13 (m, 2F), -124.96--125.06 (m, 2F). HRMS: Anal. Calcd. For  $\text{C}_{28}\text{H}_{41}\text{NOF}_7$ : 540.3076, Found: 540.3054 ( $\text{M}+1^+$ ). IR (KBr,  $\text{cm}^{-1}$ ):  $\nu$  1638, 1449, 1407, 1386, 1328, 1272.

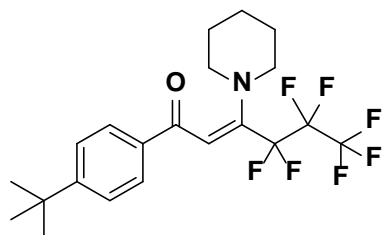

**(Z)-1-(4-(tert-butyl)phenyl)-4,4,5,5,6,6,6-heptafluoro-3-(piperidin-1-yl)hex-2-en-1-one (5g).**  $^1\text{H}$  NMR (400 MHz,  $\text{CDCl}_3$ )  $\delta$  7.84 (d,  $J = 8.3$  Hz, 2H), 7.48 (d,  $J = 8.3$  Hz, 2H), 6.36 (s, 1H), 3.07 (s, 4H), 1.61 (s, 6H), 1.34 (s, 9H);  $^{13}\text{C}$  NMR (100 MHz,  $\text{CDCl}_3$ )  $\delta$  187.8, 156.2, 148.2, 136.2, 128.2, 125.5, 106.8 (t,  $J = 6.2$  Hz), 53.0, 35.0, 31.0, 26.1, 23.6 Carbons corresponding to  $\text{C}_3\text{F}_7$  group can not be identified due to C-F coupling;  $^{19}\text{F}$  NMR (282 MHz,  $\text{CDCl}_3$ )  $\delta$  -80.40 (t,  $J = 9.8$  Hz, 3F), -109.64--109.75

(m, 2F), -125.03--125.12 (m, 2F). HRMS: Anal. Calcd. For  $C_{21}H_{25}F_7NO$ : 440.1824, Found: 440.1850 ( $M+1^+$ ). IR (KBr,  $cm^{-1}$ ):  $\nu$  1647, 1454, 1408, 1383, 1338, 1273.

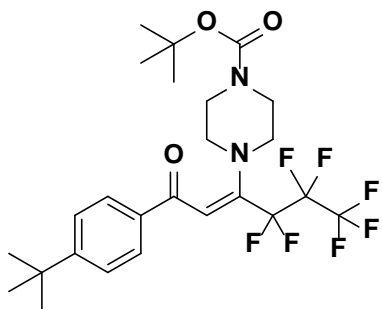

**(Z)-tert-butyl 4-(1-(4-(tert-butyl)phenyl)-4,4,5,5,6,6,6-heptafluoro-1-oxohex-2-en-3-yl)piperazine-1-carboxylate (5h).**  $^1H$  NMR (400 MHz,  $CDCl_3$ )  $\delta$  7.84 (d,  $J = 8.1$  Hz, 2H), 7.50 (d,  $J = 8.1$  Hz, 2H), 6.53 (s, 1H), 3.46-3.44 (m, 4H), 3.07-3.05 (m, 4H), 1.45 (s, 9H), 1.35 (s, 9H);  $^{13}C$  NMR (100 MHz,  $CDCl_3$ )  $\delta$  188.4, 157.0, 154.4, 146.7, 135.5, 128.4, 125.7, 111.1 (t,  $J = 5.0$  Hz), 80.0, 51.4, 42.8, 35.1, 31.0, 28.3 Carbons corresponding to  $C_3F_7$  group can not be identified due to C-F coupling;  $^{19}F$  NMR (282 MHz,  $CDCl_3$ )  $\delta$  -80.35 (t,  $J = 9.6$  Hz, 3F), -110.20--110.30 (m, 2F), -125.34--125.42 (m, 2F). HRMS: Anal. Calcd. For  $C_{25}H_{32}N_2O_3F_7$ : 541.2301, Found: 541.2285 ( $M+1^+$ ). IR (KBr,  $cm^{-1}$ ):  $\nu$  1660, 1461, 1417, 1367, 1343, 1227.

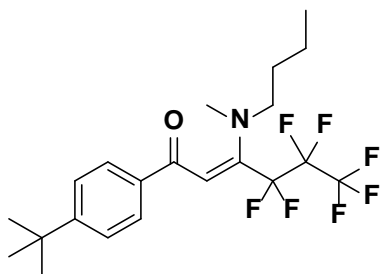

**(Z)-3-(butyl(methyl)amino)-1-(4-(tert-butyl)phenyl)-4,4,5,5,6,6,6-heptafluorohex-2-en-1-one (5i).**  $^1H$  NMR (400 MHz,  $CDCl_3$ )  $\delta$  7.85 (d,  $J = 8.1$  Hz, 2H), 7.48 (d,  $J = 8.1$  Hz, 2H), 6.32 (s, 1H), 3.24 (t,  $J = 7.4$  Hz, 2H), 2.87 (s, 3H), 1.62-1.56 (m, 2H), 1.33-1.26 (m, 11H), 0.92 (t,  $J = 7.3$  Hz, 3H);  $^{13}C$  NMR (100 MHz,  $CDCl_3$ )  $\delta$  186.7, 155.7, 147.0, 136.8, 128.1, 125.4, 103.1 (t,  $J = 6.4$  Hz), 55.1, 43.8, 35.0, 31.1, 30.6, 19.7, 13.7 Carbons corresponding to  $C_3F_7$  group can not be identified due to C-F coupling;  $^{19}F$  NMR (282 MHz,  $CDCl_3$ )  $\delta$  -80.50 (t,  $J = 9.9$  Hz, 3F), -107.84--107.95 (m, 2F), -125.42--125.50 (m, 2F). MS: Anal. Calcd. For  $C_{21}H_{27}F_7NO$ : 442, Found: 442 ( $M+1^+$ ). IR (KBr,  $cm^{-1}$ ):  $\nu$  1647, 1454, 1408, 1383, 1334, 1273.

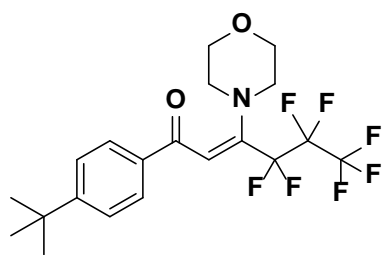

**(Z)-1-(4-(tert-butyl)phenyl)-4,4,5,5,6,6,6-heptafluoro-3-morpholinohex-2-en-1-one**

**(5j).**  $^1\text{H}$  NMR (400 MHz,  $\text{CDCl}_3$ )  $\delta$  7.85 (d,  $J = 7.9$  Hz, 2H), 7.50 (d,  $J = 8.0$  Hz, 2H), 6.47 (s, 1H), 3.71 (t,  $J = 4.0$  Hz, 4H), 3.13 (t,  $J = 4.0$  Hz, 4H), 1.35 (s, 9H);  $^{13}\text{C}$  NMR (100 MHz,  $\text{CDCl}_3$ )  $\delta$  188.2, 156.7, 146.5, 135.7, 128.3, 125.6, 109.0 (t,  $J = 5.9$  Hz), 66.5, 52.0, 35.1, 31.0 Carbons corresponding to  $\text{C}_3\text{F}_7$  group can not be identified due to C-F coupling;  $^{19}\text{F}$  NMR (282 MHz,  $\text{CDCl}_3$ )  $\delta$  -80.39 (t,  $J = 9.6$  Hz, 3F), -109.54--109.64 (m, 2F), -125.27--125.35 (m, 2F). HRMS: Anal. Calcd. For  $\text{C}_{20}\text{H}_{23}\text{F}_7\text{NO}_2$ : 442.1617, Found: 442.1614 ( $\text{M}+1^+$ ). IR (KBr,  $\text{cm}^{-1}$ ):  $\nu$  1655, 1451, 1406, 1384, 1343, 1231.

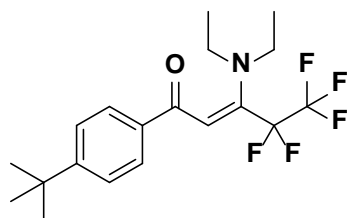

**(Z)-1-(4-(tert-butyl)phenyl)-3-(diethylamino)-4,4,5,5,5-pentafluoropent-2-en-1-one**

**(6a).**  $^1\text{H}$  NMR (400 MHz,  $\text{CDCl}_3$ )  $\delta$  7.85 (d,  $J = 8.3$  Hz, 2H), 7.48 (d,  $J = 8.3$  Hz, 2H), 6.49 (s, 1H), 3.25 (q,  $J = 7.0$  Hz, 4H), 1.34 (s, 9H), 1.08 (t,  $J = 7.1$  Hz, 6H);  $^{13}\text{C}$  NMR (100 MHz,  $\text{CDCl}_3$ )  $\delta$  186.7, 155.9, 145.6, 136.5, 128.1, 125.4, 105.9 (t,  $J = 5.7$  Hz), 47.1, 35.0, 31.0, 12.9 Carbons corresponding to  $\text{C}_2\text{F}_5$  group can not be identified due to C-F coupling;  $^{19}\text{F}$  NMR (282 MHz,  $\text{CDCl}_3$ )  $\delta$  -82.82 (s, 3F), -111.11 (s, 2F). MS: Anal. Calcd. For  $\text{C}_{19}\text{H}_{25}\text{F}_5\text{NO}$ : 378, Found: 378 ( $\text{M}+1^+$ ). IR (KBr,  $\text{cm}^{-1}$ ):  $\nu$  1640, 1450, 1408, 1383, 1331, 1273.

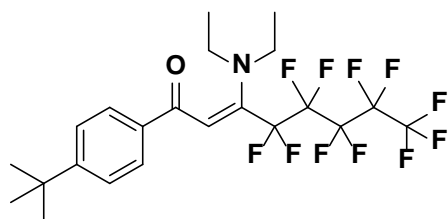

**(Z)-1-(4-(tert-butyl)phenyl)-3-(diethylamino)-4,4,5,5,6,6,7,7,8,8,8-undecafluorooct-2-en-1-one (6b).**

$^1\text{H}$  NMR (400 MHz,  $\text{CDCl}_3$ )  $\delta$  7.86 (d,  $J = 8.3$  Hz, 2H), 7.48 (d,  $J = 8.3$  Hz, 2H), 6.49 (s, 1H), 3.24 (q,  $J = 6.9$  Hz, 4H), 1.34 (s, 9H), 1.10 (t,  $J = 7.0$  Hz, 6H);  $^{13}\text{C}$  NMR (100 MHz,  $\text{CDCl}_3$ )  $\delta$  186.8, 156.0, 146.3, 136.5, 128.1, 125.5, 106.6 (t,  $J = 6.4$  Hz), 47.2, 35.0, 31.1, 13.1 Carbons corresponding to  $\text{C}_5\text{F}_{11}$  group can not be identified due to C-F coupling;  $^{19}\text{F}$  NMR (282 MHz,  $\text{CDCl}_3$ )  $\delta$  -80.98 (t,  $J = 10.0$

Hz, 3F), -107.67 (t,  $J = 14.9$  Hz, 2F), -121.28--121.36 (m, 2F), -122.61--122.71 (m, 2F), -126.24--126.34 (m, 2F). MS: Anal. Calcd. For  $C_{22}H_{25}F_{11}NO$ : 528, Found: 528 ( $M+1^+$ ). IR (KBr,  $cm^{-1}$ ):  $\nu$  1647, 1451, 1400, 1387, 1358, 1250.

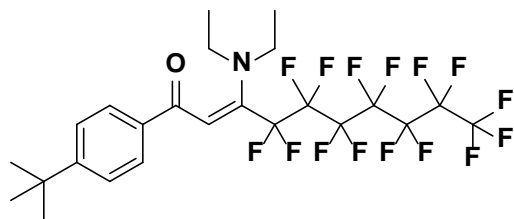

**(Z)-1-(4-(tert-butyl)phenyl)-3-(diethylamino)-4,4,5,5,6,6,7,7,8,8,9,9,10,10,10-pentadecafluorodec-2-en-1-one (6c).**  $^1H$  NMR (400 MHz,  $CDCl_3$ )  $\delta$  7.86 (d,  $J = 8.0$  Hz, 2H), 7.49 (d,  $J = 8.0$  Hz, 2H), 6.50 (s, 1H), 3.25 (q,  $J = 6.8$  Hz, 4H), 1.34 (s, 9H), 1.10 (t,  $J = 6.8$  Hz, 6H);  $^{13}C$  NMR (100 MHz,  $CDCl_3$ )  $\delta$  186.8, 156.0, 146.4, 136.6, 128.2, 125.5, 106.7 (t,  $J = 6.1$  Hz), 47.2, 35.0, 31.0, 13.1 Carbons corresponding to  $C_7F_{15}$  group can not be identified due to C-F coupling;  $^{19}F$  NMR (282 MHz,  $CDCl_3$ )  $\delta$  -81.23 (t,  $J = 9.9$  Hz, 3F), -107.75 (t,  $J = 14.7$  Hz, 2F), -121.22--121.26 (m, 2F), -121.78--121.85 (m, 2F), -122.14--122.20 (m, 2F), -123.01--123.04 (m, 2F), -126.44--126.50 (m, 2F). HRMS: Anal. Calcd. For  $C_{24}H_{25}F_{15}NO$ : 628.1697, Found: 628.1637 ( $M+1^+$ ). IR (KBr,  $cm^{-1}$ ):  $\nu$  1638, 1450, 1406, 1384, 1335, 1278.

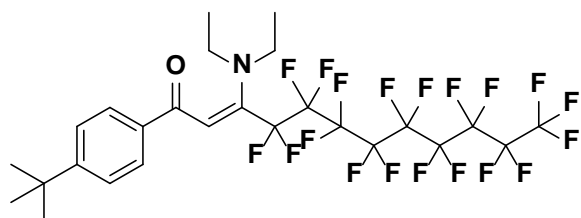

**(Z)-1-(4-(tert-butyl)phenyl)-3-(diethylamino)-4,4,5,5,6,6,7,7,8,8,9,9,10,10,11,11,12,12,12-nonadecafluorododec-2-en-1-one (6d).**  $^1H$  NMR (400 MHz,  $CDCl_3$ )  $\delta$  7.86 (d,  $J = 8.2$  Hz, 2H), 7.48 (d,  $J = 8.2$  Hz, 2H), 6.49 (s, 1H), 3.24 (q,  $J = 6.8$  Hz, 4H), 1.34 (s, 9H), 1.10 (t,  $J = 6.9$  Hz, 6H);  $^{13}C$  NMR (100 MHz,  $CDCl_3$ )  $\delta$  186.8, 156.0, 146.4, 136.6, 128.2, 125.5, 106.7 (t,  $J = 6.4$  Hz), 47.2, 35.0, 31.0, 13.1 Carbons corresponding to  $C_9F_{19}$  group can not be identified due to C-F coupling;  $^{19}F$  NMR (282 MHz,  $CDCl_3$ )  $\delta$  -81.16 (t,  $J = 9.6$  Hz, 3F), -107.72 (t,  $J = 14.2$  Hz, 2F), -121.17--121.23 (m, 2F), -121.76--122.13 (m, 8F), -122.98--123.03 (m, 2F), -126.43--126.47 (m, 2F). HRMS: Anal. Calcd. For  $C_{26}H_{24}F_{19}NONa$ : 750.1452, Found: 750.1461. IR (KBr,  $cm^{-1}$ ):  $\nu$  1638, 1453, 1406, 1390, 1249.

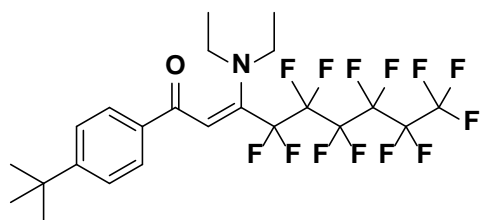

**(Z)-1-(4-(tert-butyl)phenyl)-3-(diethylamino)-4,4,5,5,6,6,7,7,8,8,9,9,9-tridecafluoronon-2-en-1-one (6e).**  $^1\text{H}$  NMR (400 MHz,  $\text{CDCl}_3$ )  $\delta$  7.85 (d,  $J = 8.1$  Hz, 2H), 7.48 (d,  $J = 8.1$  Hz, 2H), 6.48 (s, 1H), 3.24 (q,  $J = 7.0$  Hz, 4H), 1.34 (s, 9H), 1.10 (t,  $J = 7.0$  Hz, 6H);  $^{13}\text{C}$  NMR (100 MHz,  $\text{CDCl}_3$ )  $\delta$  186.8, 156.0, 146.4, 136.5, 128.1, 125.5, 106.6 (t,  $J = 6.4$  Hz), 47.2, 35.0, 31.1 13.1 Carbons corresponding to  $\text{C}_6\text{F}_{13}$  group can not be identified due to C-F coupling;  $^{19}\text{F}$  NMR (282 MHz,  $\text{CDCl}_3$ )  $\delta$  -80.90 (t,  $J = 10.0$  Hz, 3F), -107.61 (t,  $J = 15.2$  Hz, 2F), -121.04--121.17 (m, 2F), -121.79--121.89 (m, 2F), -122.76--122.84 (m, 2F), -126.18--126.23 (m, 2F). HRMS: Anal. Calcd. For  $\text{C}_{23}\text{H}_{25}\text{F}_{13}\text{NO}$ : 578.1729, Found: 578.1728 ( $\text{M}+1^+$ ). IR (KBr,  $\text{cm}^{-1}$ ):  $\nu$  1645, 1454, 1401, 1387, 1356, 1249.

## XRD data of the comound 4l.

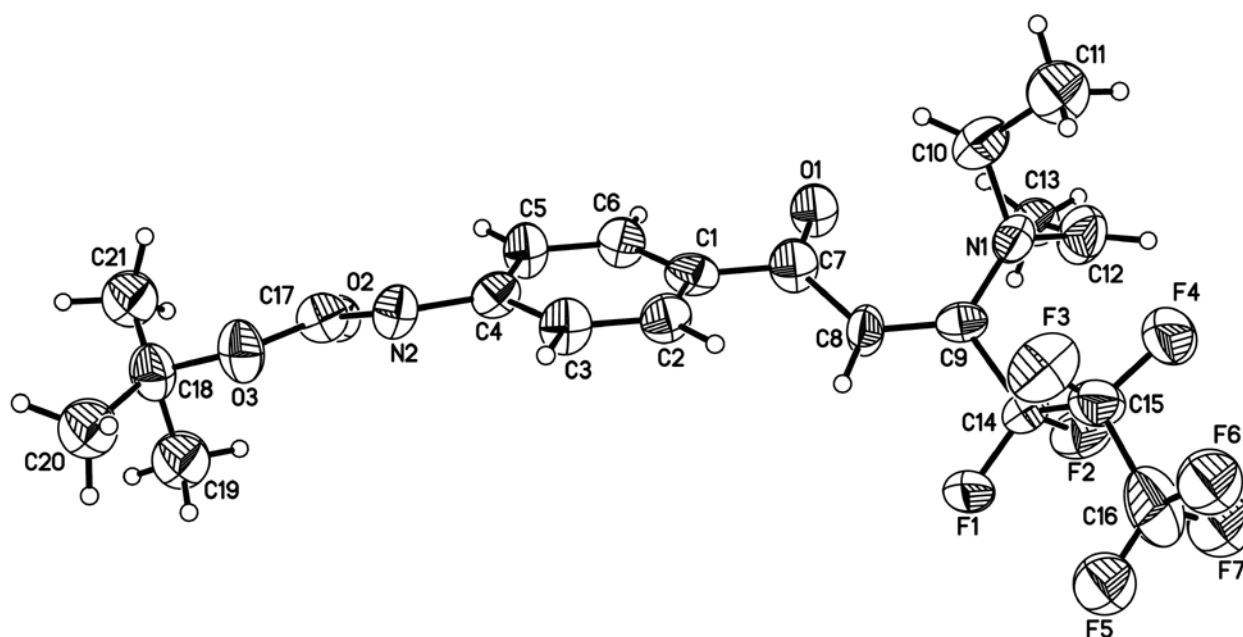

**Figure S2.** ORTEP structural drawing of **4l**. Ellipsoids are drawn at the 30% probability level, and hydrogen atoms are omitted for clarity.

**Table S1.** Crystallography data for **4l**

| complex                         | <b>4l</b>                                                        |
|---------------------------------|------------------------------------------------------------------|
| Empirical formula               | $C_{21}H_{22}F_7N_2O_3$                                          |
| Formula weight( $g\ mol^{-1}$ ) | 483.41                                                           |
| Temperature                     | 293 (2) K                                                        |
| Wavelength                      | 0.71070 Å                                                        |
| Crystal system                  | orthorhombic □                                                   |
| space group                     | P 21                                                             |
| Unit cell dimensions            | $a = 26.437(9)$ Å                                                |
|                                 | $b = 10.311(3)$ Å                                                |
|                                 | $c = 9.126(3)$ Å                                                 |
|                                 | $\alpha = 90^\circ$<br>$\beta = 90^\circ$<br>$\gamma = 90^\circ$ |
| Volume (Å <sup>3</sup> )        | 2487.7(13)                                                       |
| Z                               | 4                                                                |
| $\rho(g\ cm^{-3})$              | 1.291                                                            |
| F(000)                          | 996                                                              |
| Crystal size(mm <sup>3</sup> )  | 0.65 x 0.20 x 0.20                                               |
| Theta range for data collection | 3.04 ° to 25.35 °                                                |
| Limiting indices                | -31 ≤ h ≤ 31                                                     |

|                                                     |                                           |
|-----------------------------------------------------|-------------------------------------------|
|                                                     | -12 < = k < = 12                          |
|                                                     | -9 < = l < = 10                           |
| Reflections collected / unique                      | 19746 / 4224                              |
| Data / restraints / parameters                      | 4224 / 17 / 290                           |
| GOF                                                 | 1.136                                     |
| <i>RI</i> , <i>wR2</i> [ <i>I</i> > 2σ( <i>I</i> )] | <i>RI</i> = 0.1049<br><i>wR2</i> = 0.2433 |
| <i>RI</i> , <i>wR2</i> (all data)                   | <i>RI</i> = 0.1706<br><i>wR2</i> = 0.2747 |
| Largest diff. peak and hole(e Å <sup>3</sup> )      | 1.199 and -0.240                          |

**Table S2.** Bond lengths [Å] and angles [°] for **4l**

|                   |           |                   |           |
|-------------------|-----------|-------------------|-----------|
| F(1)-C(14)        | 1.346(9)  | F(2)-C(14)        | 1.355(9)  |
| F(3)-C(15)        | 1.320(11) | F(4)-C(15)        | 1.338(11) |
| F(5)-C(16)        | 1.192(14) | F(6)-C(16)        | 1.391(15) |
| F(7)-C(16)        | 1.419(18) | F(5A)-C(16)       | 1.228(16) |
| F(6A)-C(16)       | 1.309(15) | F(7A)-C(16)       | 2.151(11) |
| O(1)-C(7)         | 1.226(8)  | O(2)-C(17)        | 1.284(13) |
| O(2A)-C(17)       | 1.486(11) | N(1)-C(9)         | 1.384(9)  |
| O(3)-C(18)        | 81.9(4)   | N(1)-C(10)        | 1.440(11) |
| N(1)-C(12)        | 1.466(11) | N(2)-C(17)        | 1.339(10) |
| N(2)-C(4)         | 1.422(9)  | C(17)-O(3)-C(18)  | 124.1(6)  |
| C(9)-N(1)-C(10)   | 122.3(7)  | C(9)-N(1)-C(12)   | 122.0(7)  |
| C(10)-N(1)-C(12)  | 112.4(8)  | C(17)-N(2)-C(4)   | 127.1(6)  |
| F(1)-C(14)-F(2)   | 105.7(6)  | F(1)-C(14)-C(9)   | 111.1(6)  |
| F(2)-C(14)-C(9)   | 111.6(6)  | F(3)-C(15)-F(4)   | 108.1(8)  |
| F(5)-C(16)-F(7A)  | 77.3(13)  | F(5)-C(16)-F(6A)  | 125.9(11) |
| F(7A)-C(16)-F(6A) | 107.7(13) | F(5)-C(16)-F(6)   | 110.8(11) |
| F(7A)-C(16)-F(6)  | 133.9(13) | F(6A)-C(16)-F(6)  | 29.9(7)   |
| F(5)-C(16)-F(7)   | 105.9(13) | F(7A)-C(16)-F(7)  | 29.8(9)   |
| F(6A)-C(16)-F(7)  | 84.3(10)  | F(6)-C(16)-F(7)   | 114.0(10) |
| F(5)-C(16)-F(5A)  | 34.5(7)   | F(7A)-C(16)-F(5A) | 111.5(13) |



---

|                   |           |                  |         |
|-------------------|-----------|------------------|---------|
| F(6A)-C(16)-F(5A) | 116.1(10) | F(6)-C(16)-F(5A) | 89.4(9) |
| F(7)-C(16)-F(5A)  | 140.4(13) |                  |         |

---

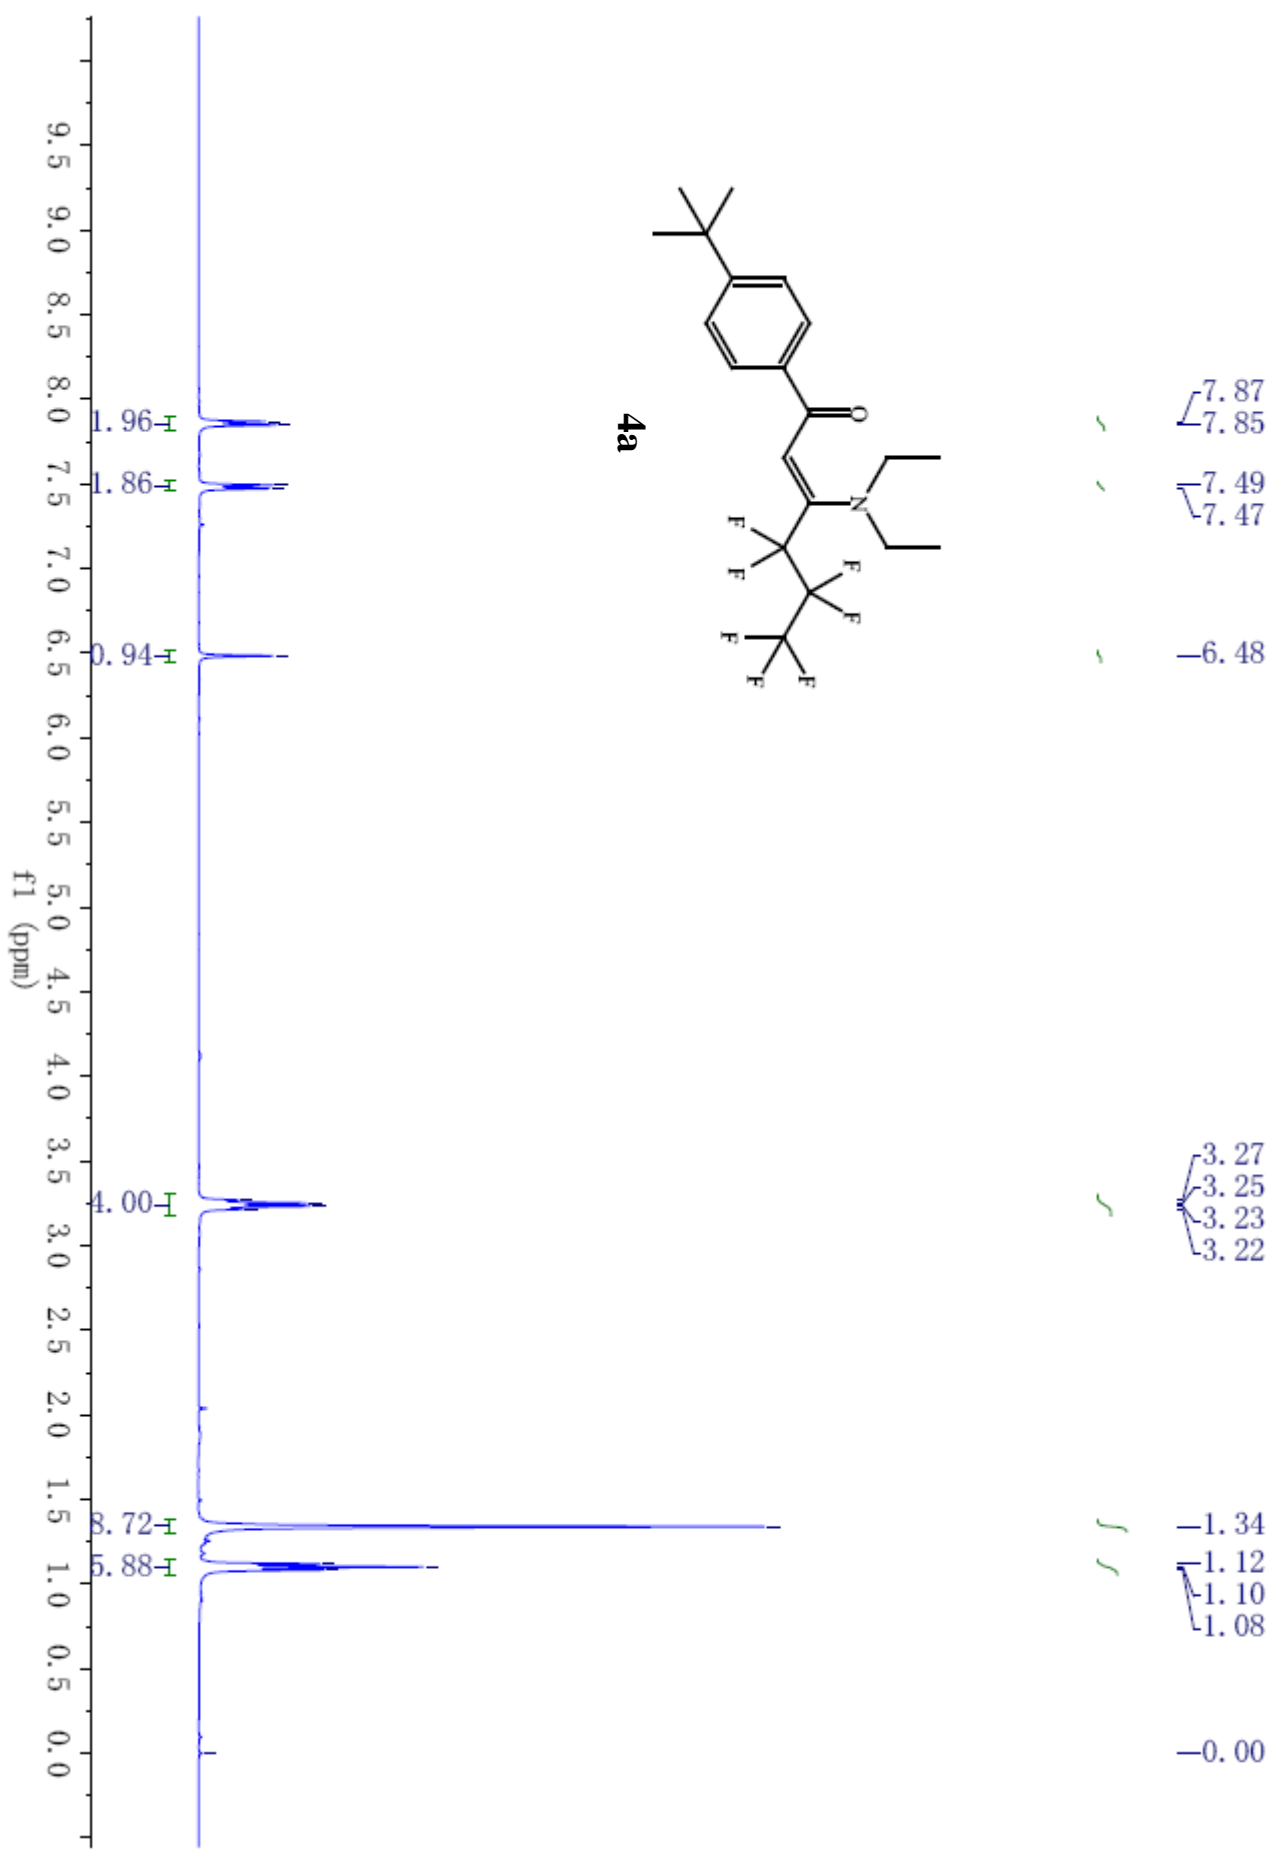

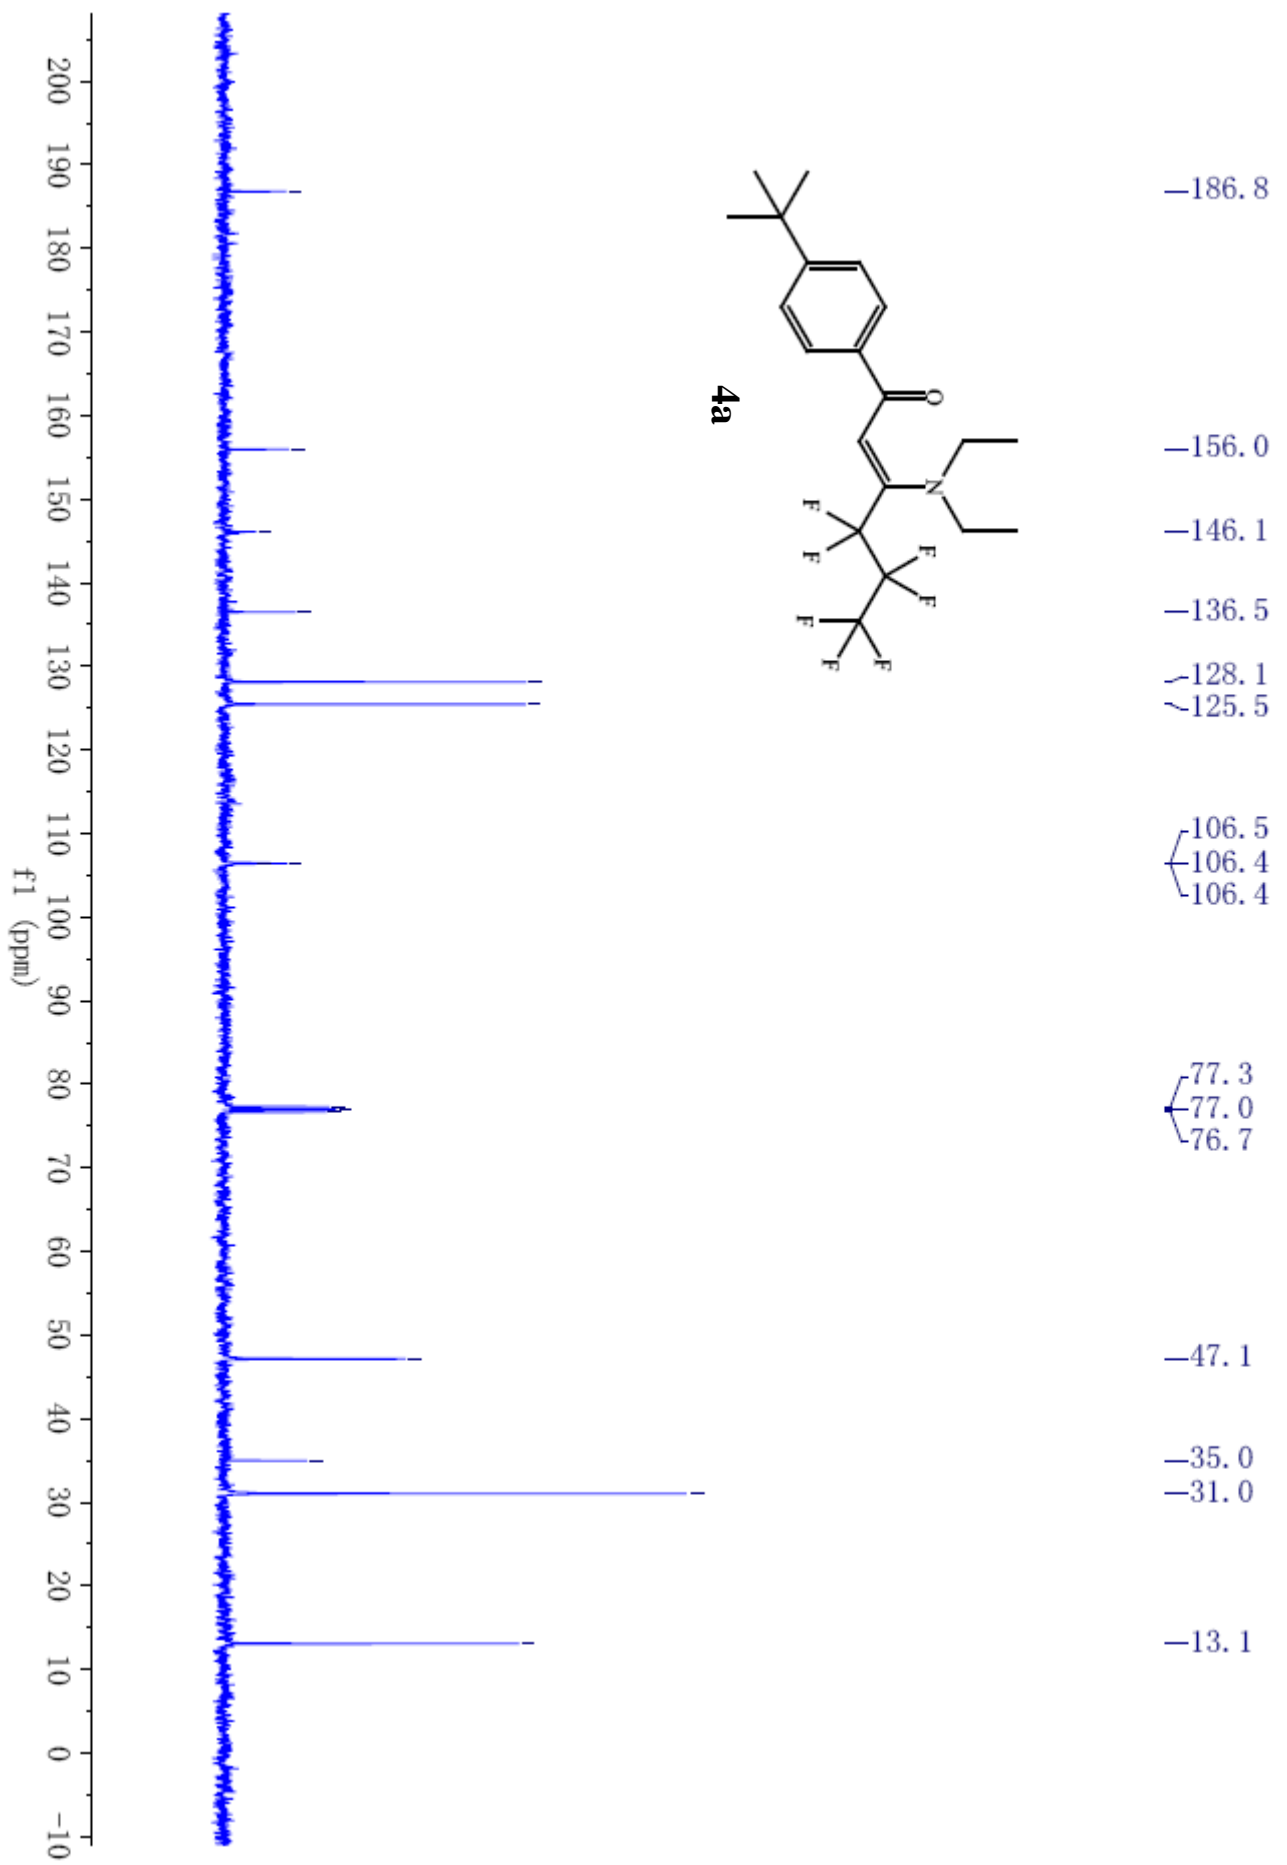

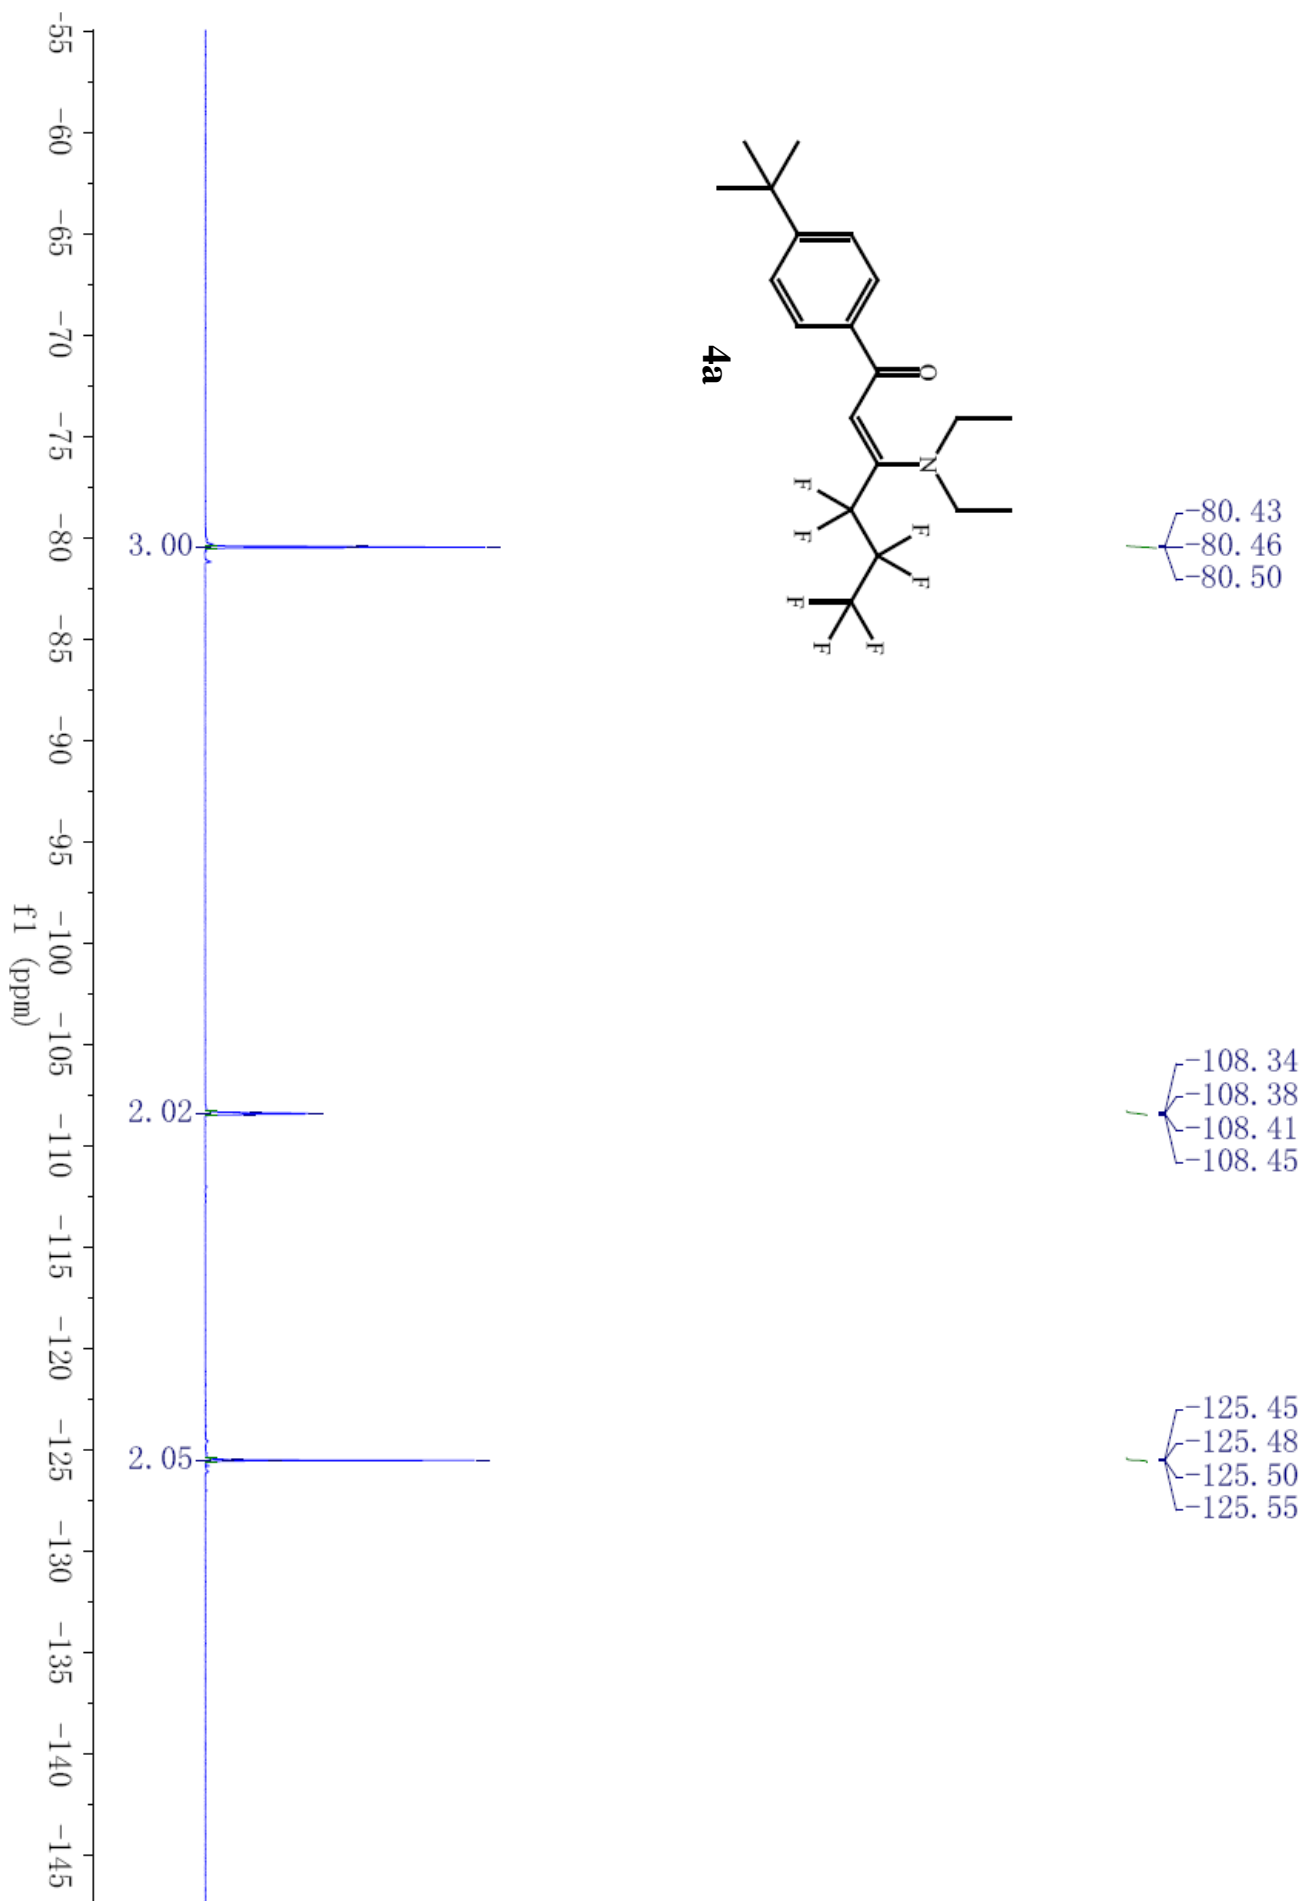

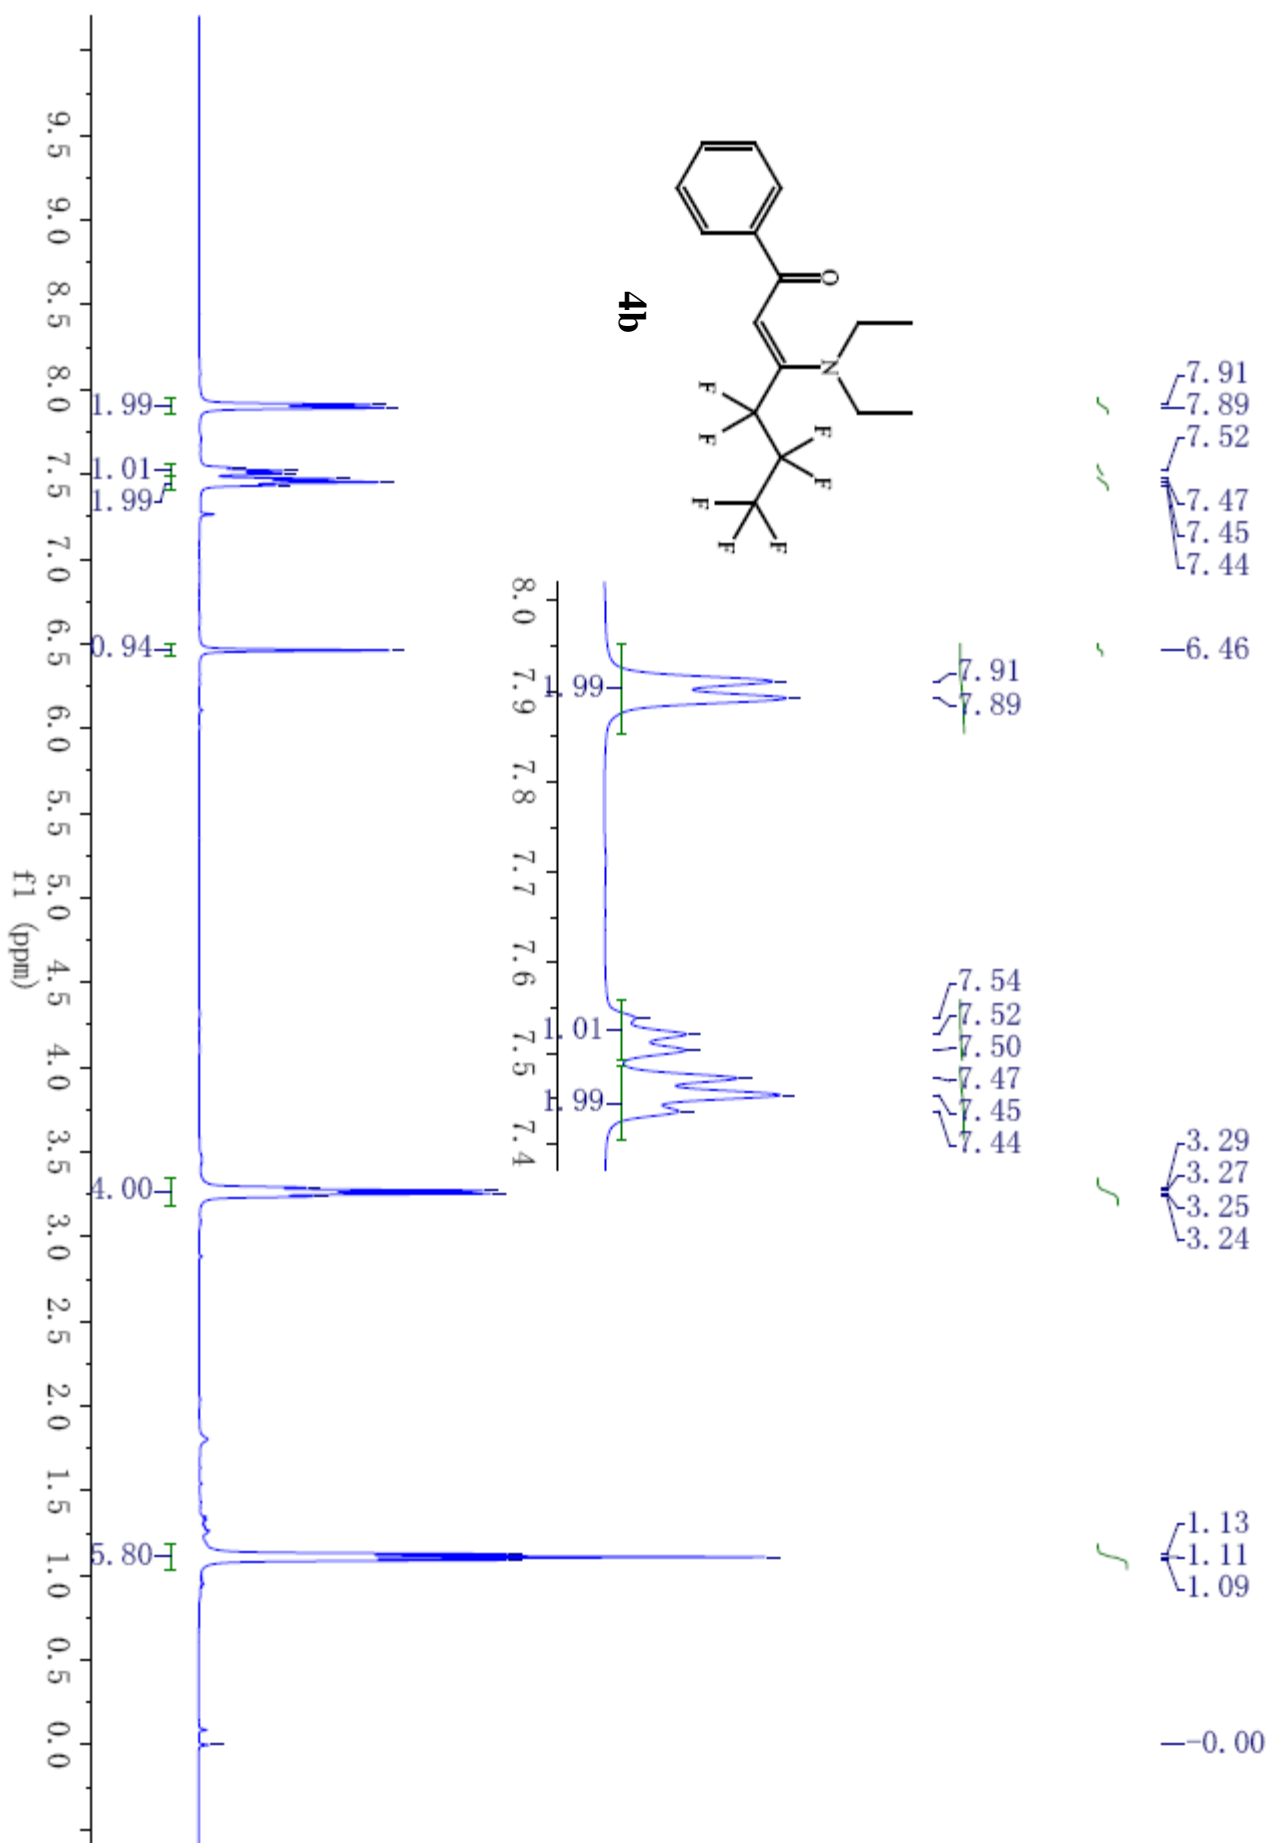

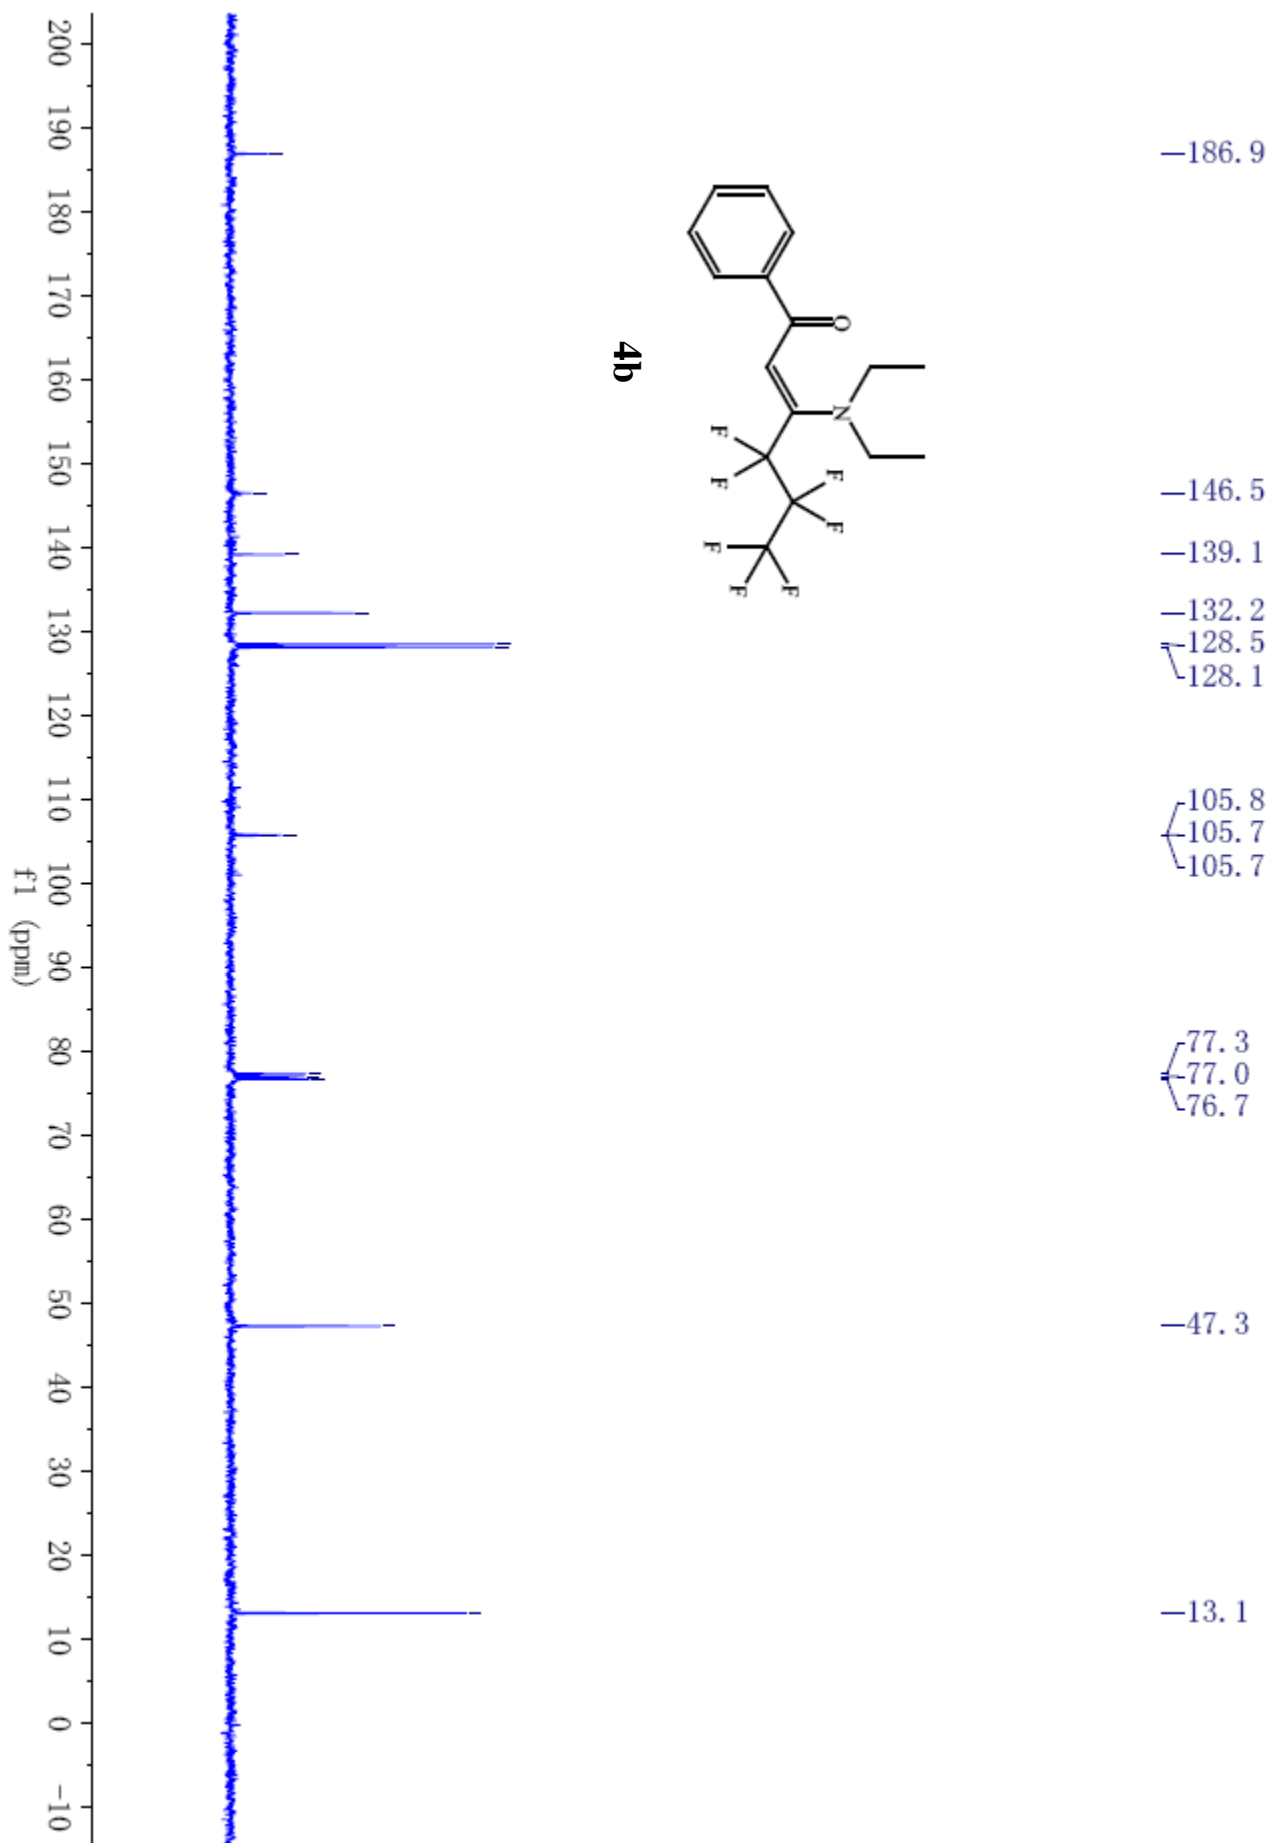

4b

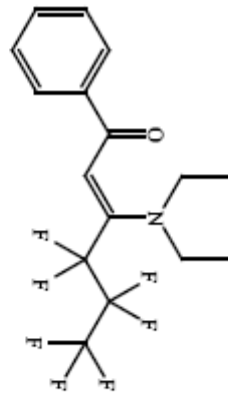

-80.47  
-80.50  
-80.54

-108.26  
-108.30  
-108.33  
-108.37

-125.43  
-125.48  
-125.50  
-125.53

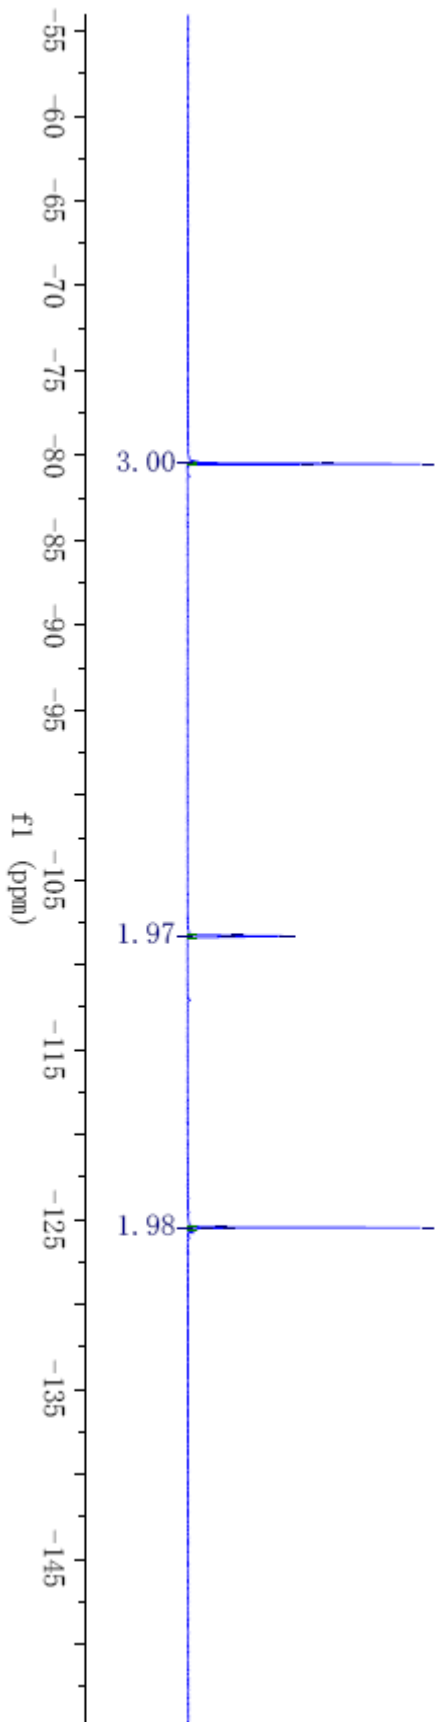

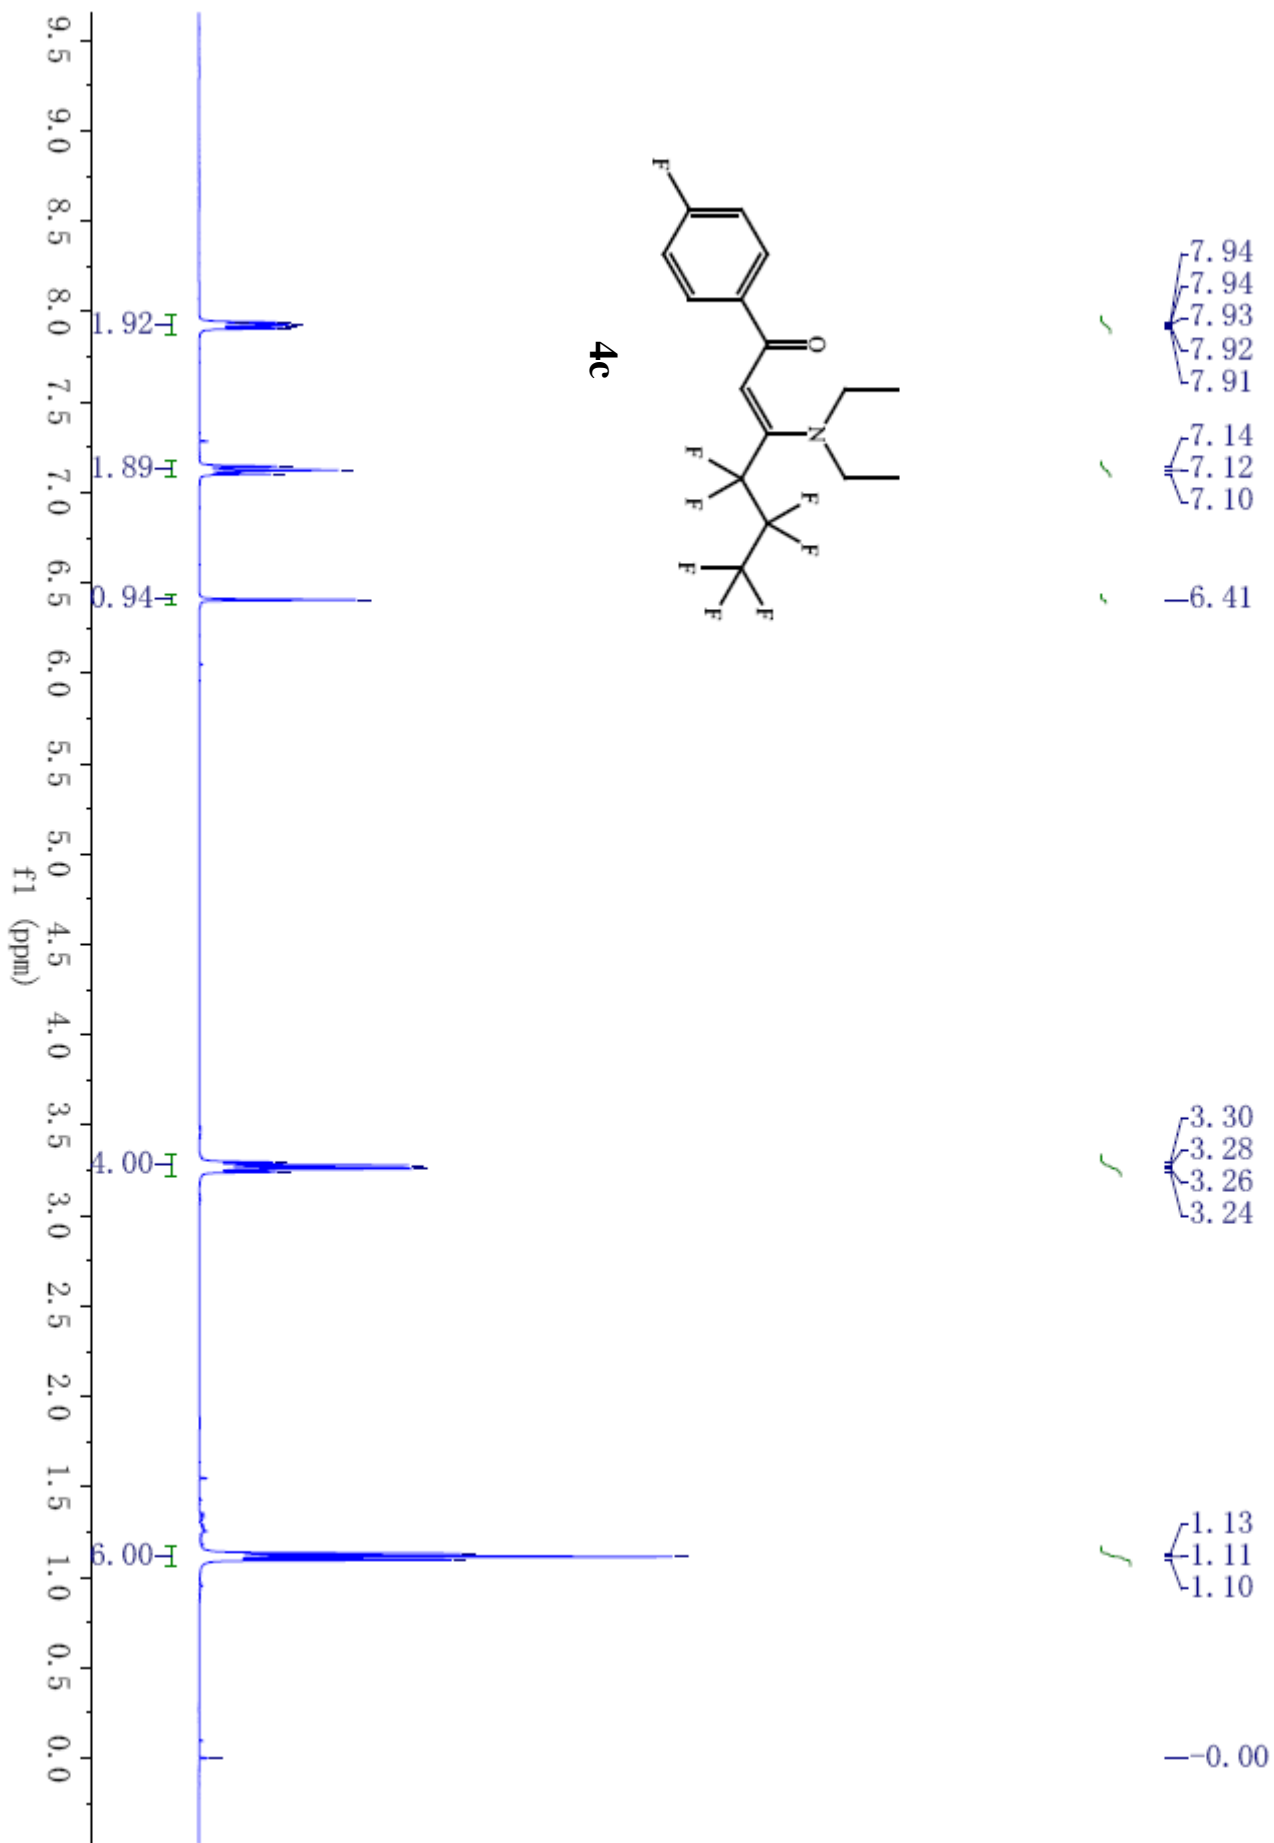



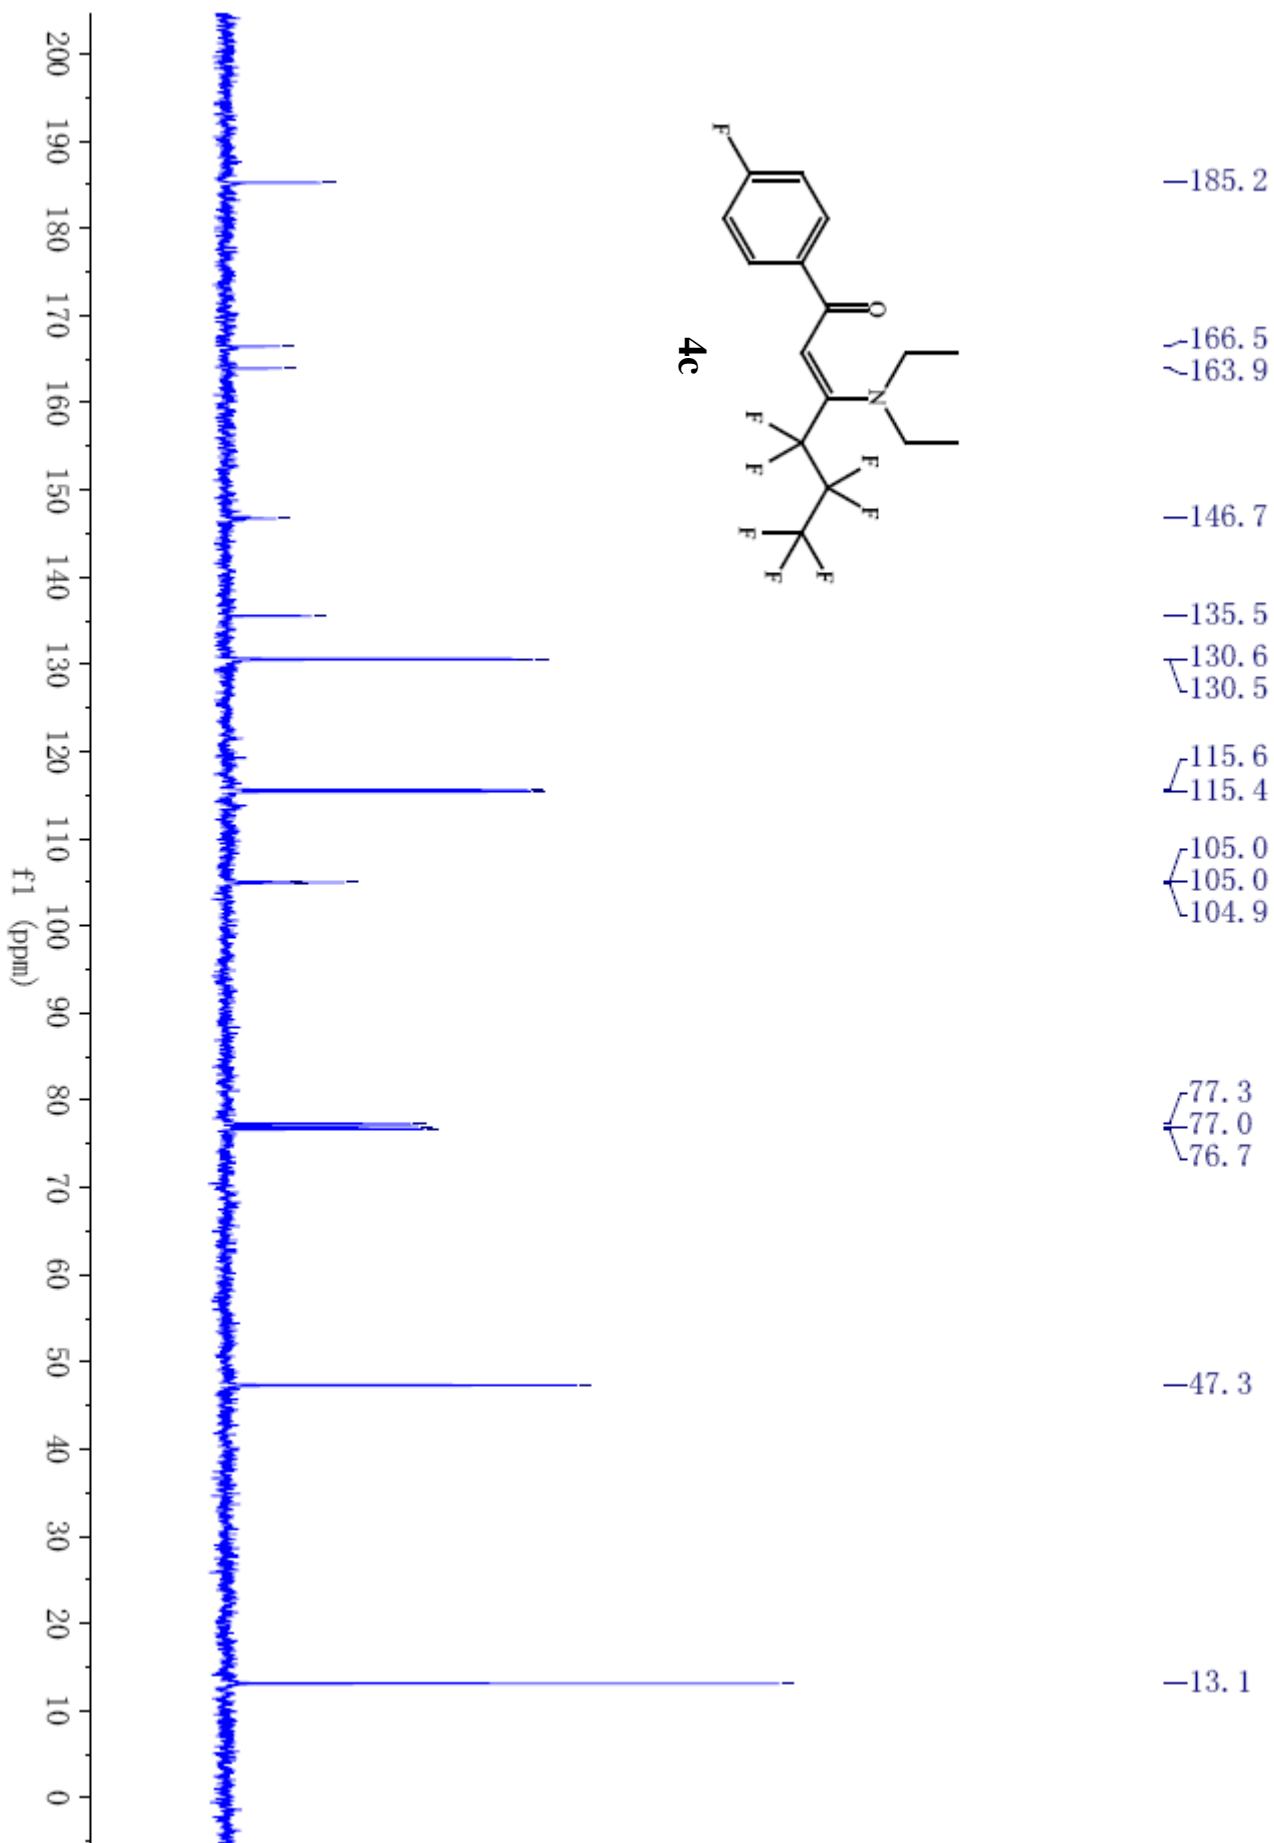

4c

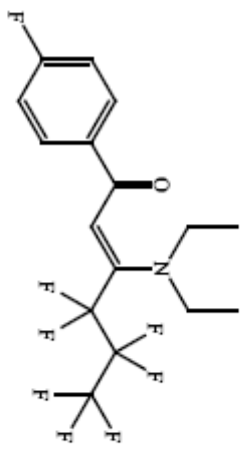

-80.34  
-80.38  
-80.41

-106.79  
-106.81  
-106.82  
-106.83  
-106.84  
-106.86  
-106.87  
-106.89  
-108.15  
-108.18  
-108.22  
-108.26

-125.32  
-125.35  
-125.37  
-125.42

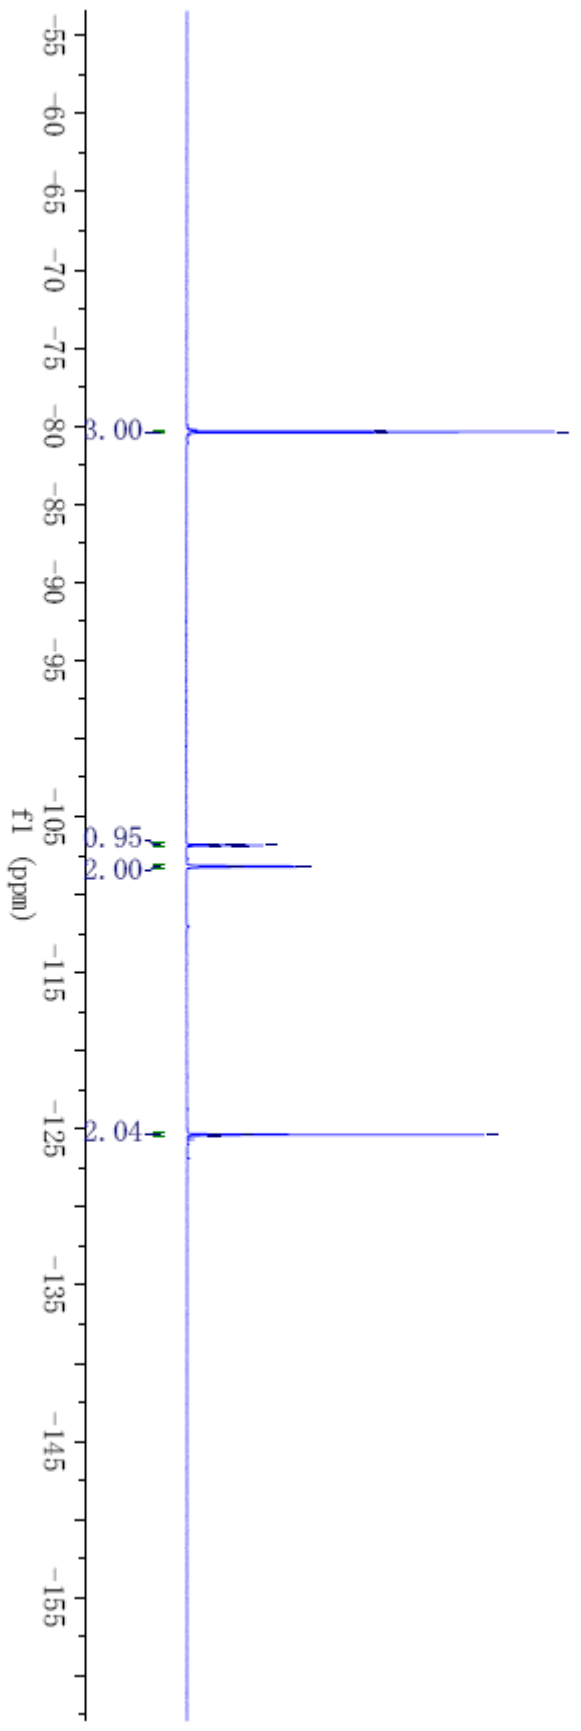

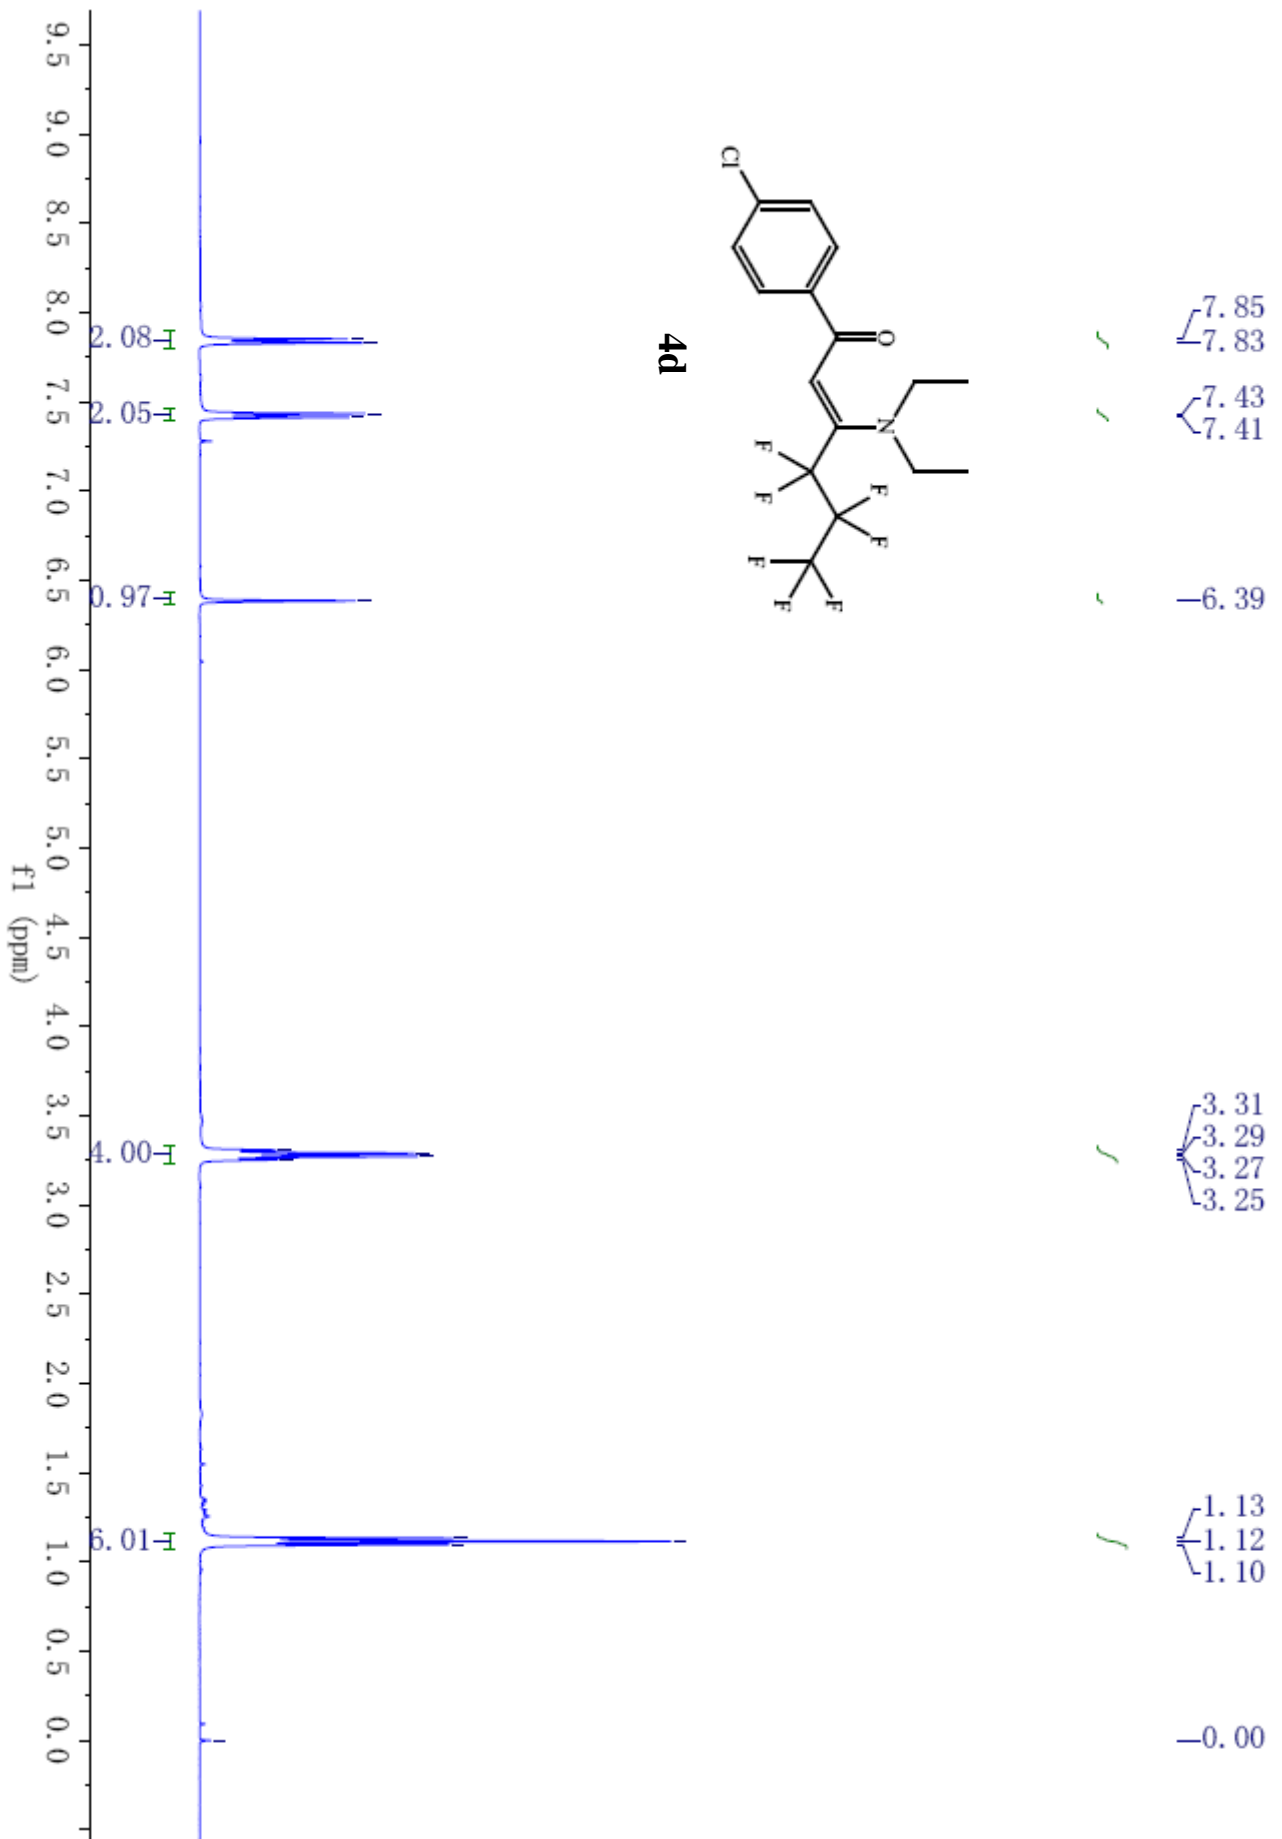

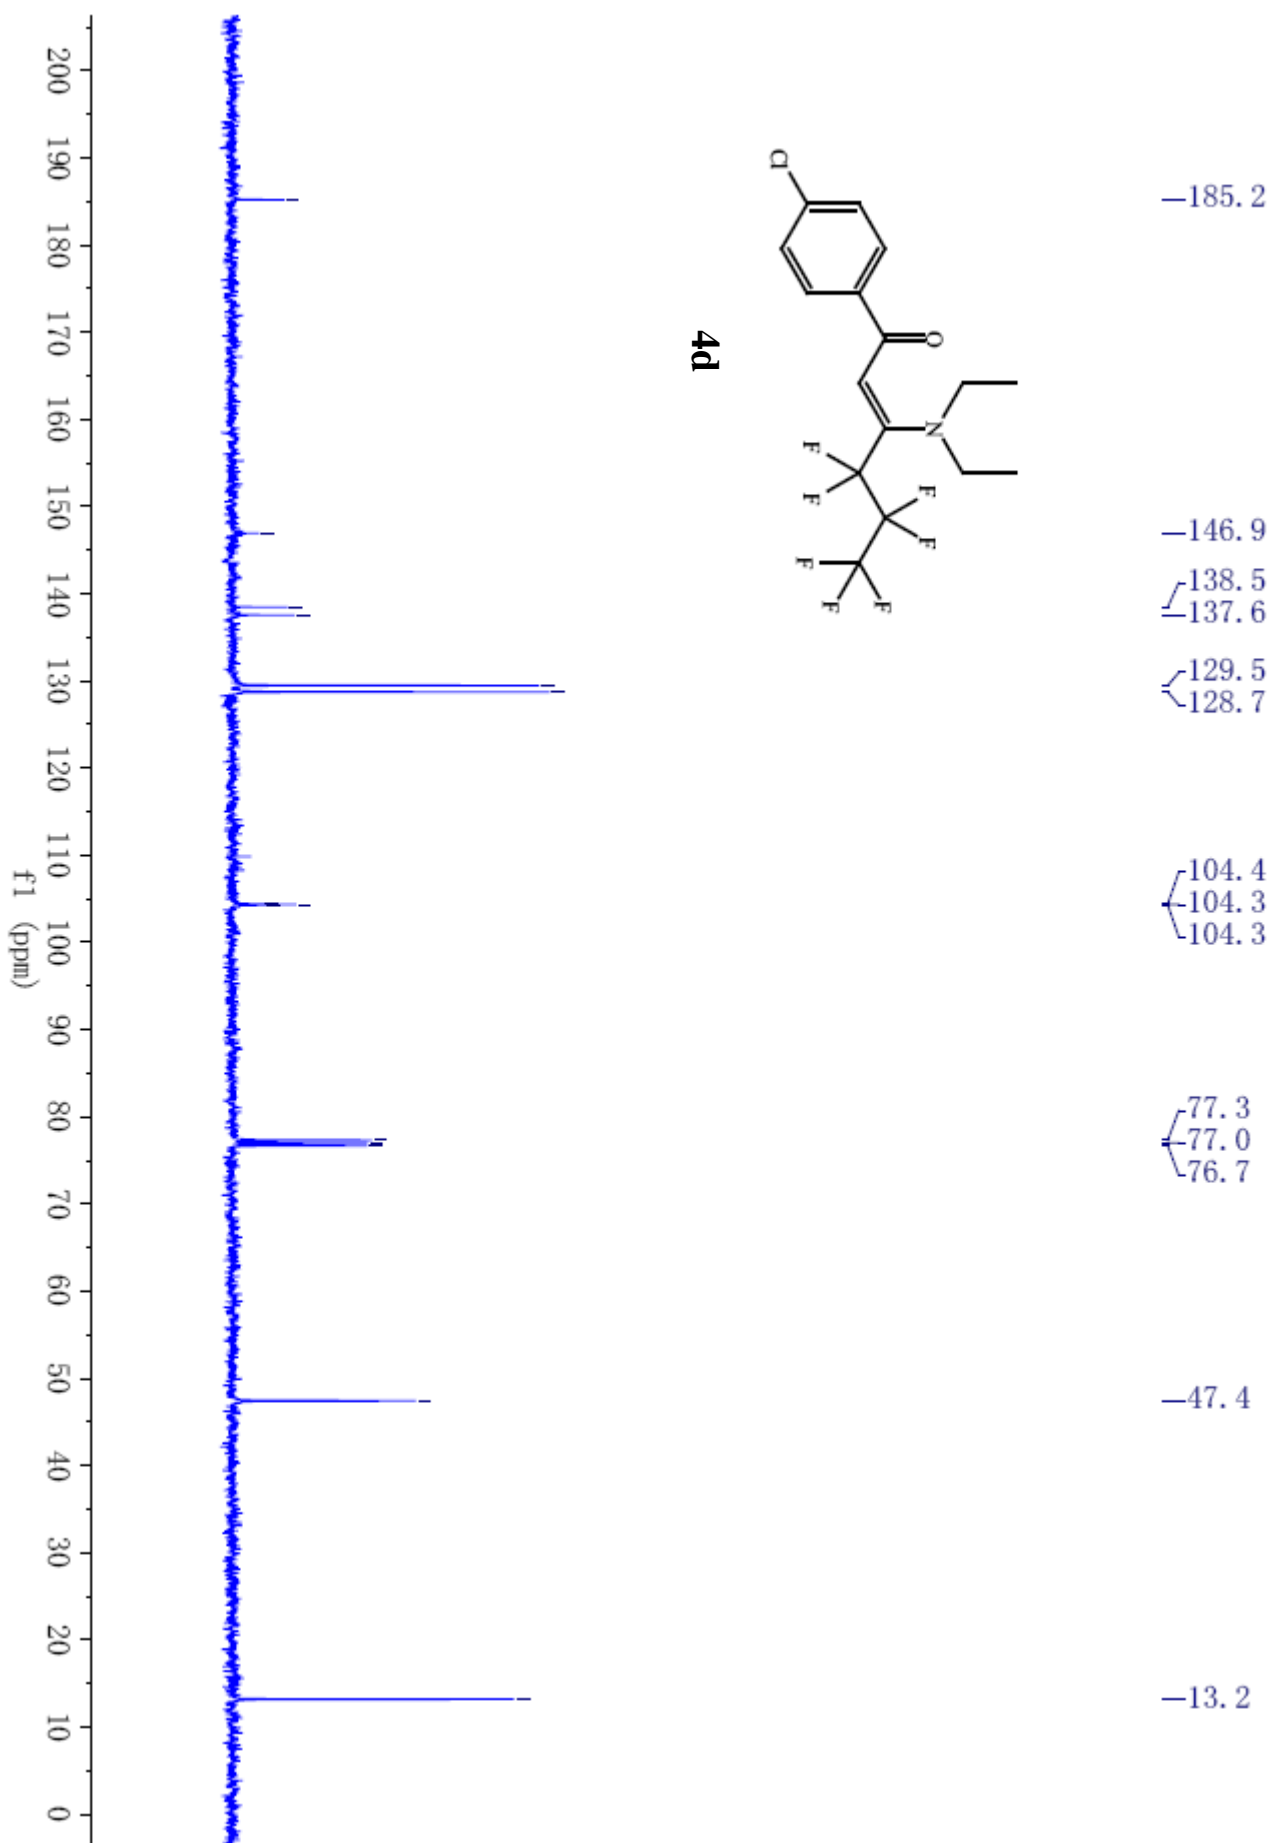

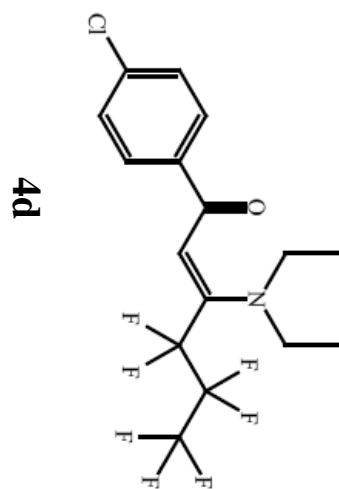

-80.37  
-80.40  
-80.44

-108.10  
-108.14  
-108.17  
-108.21

-125.31  
-125.33  
-125.36  
-125.40

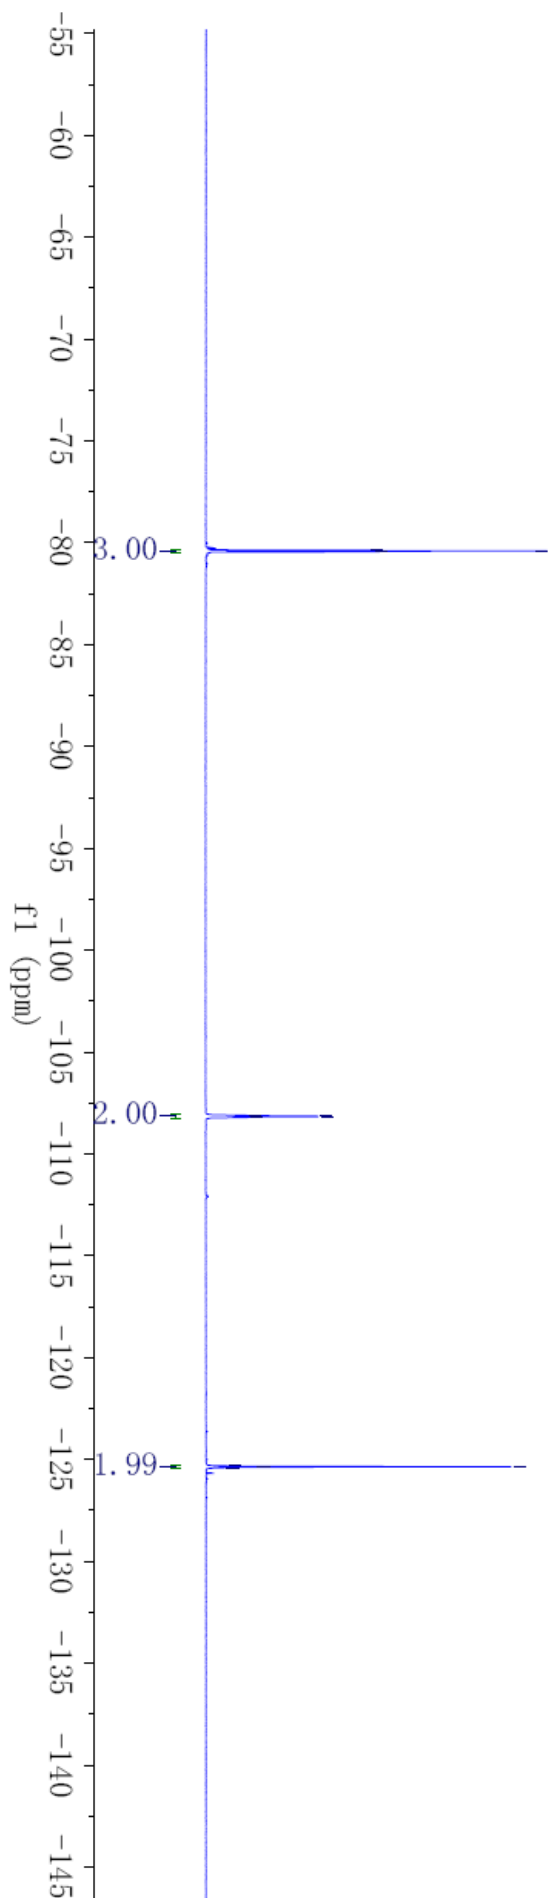

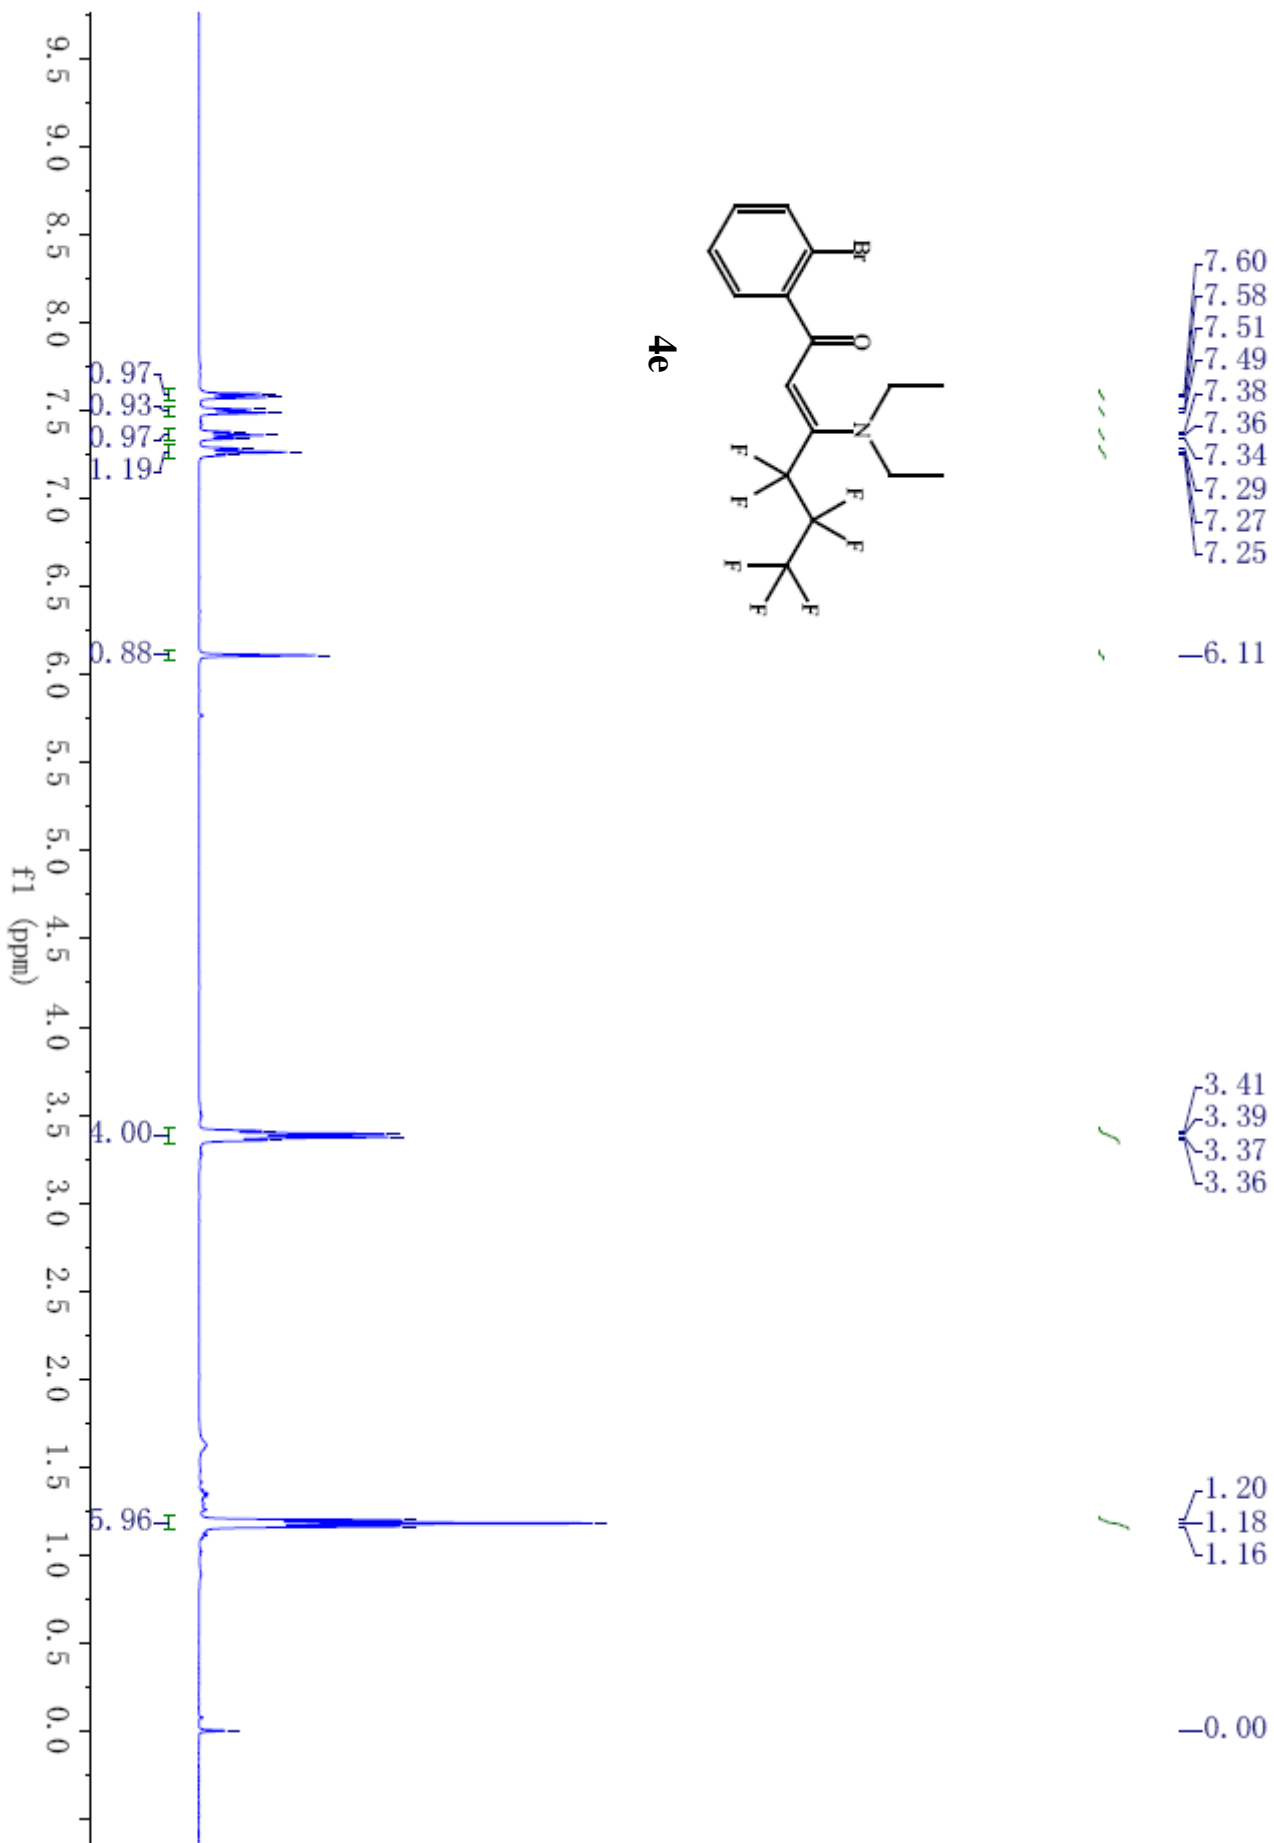

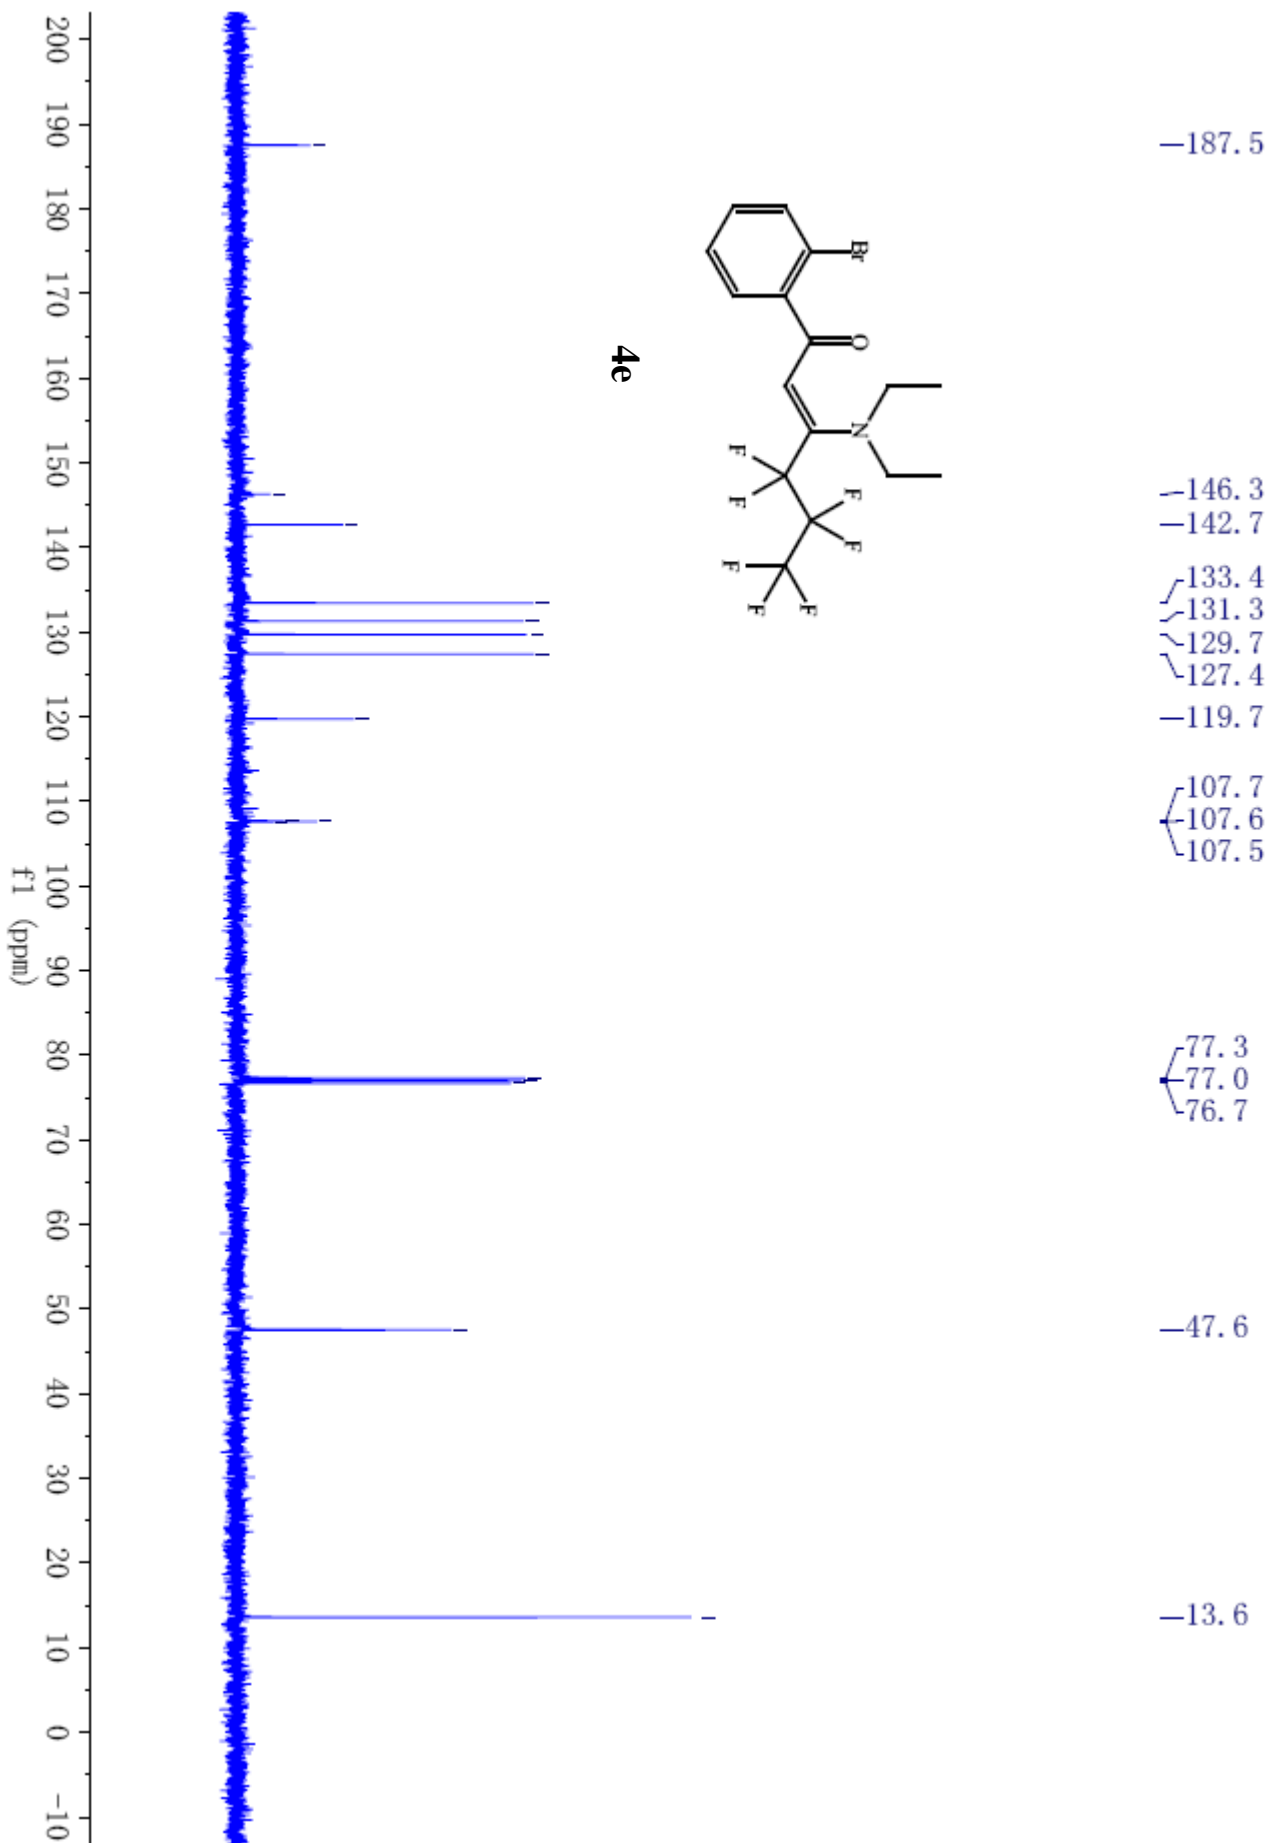

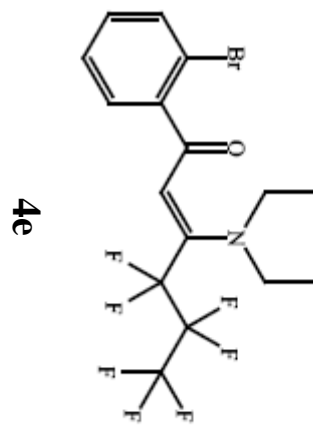

-80.38  
-80.41  
-80.45

-108.08  
-108.12  
-108.15  
-108.19

-125.22  
-125.25  
-125.27  
-125.31

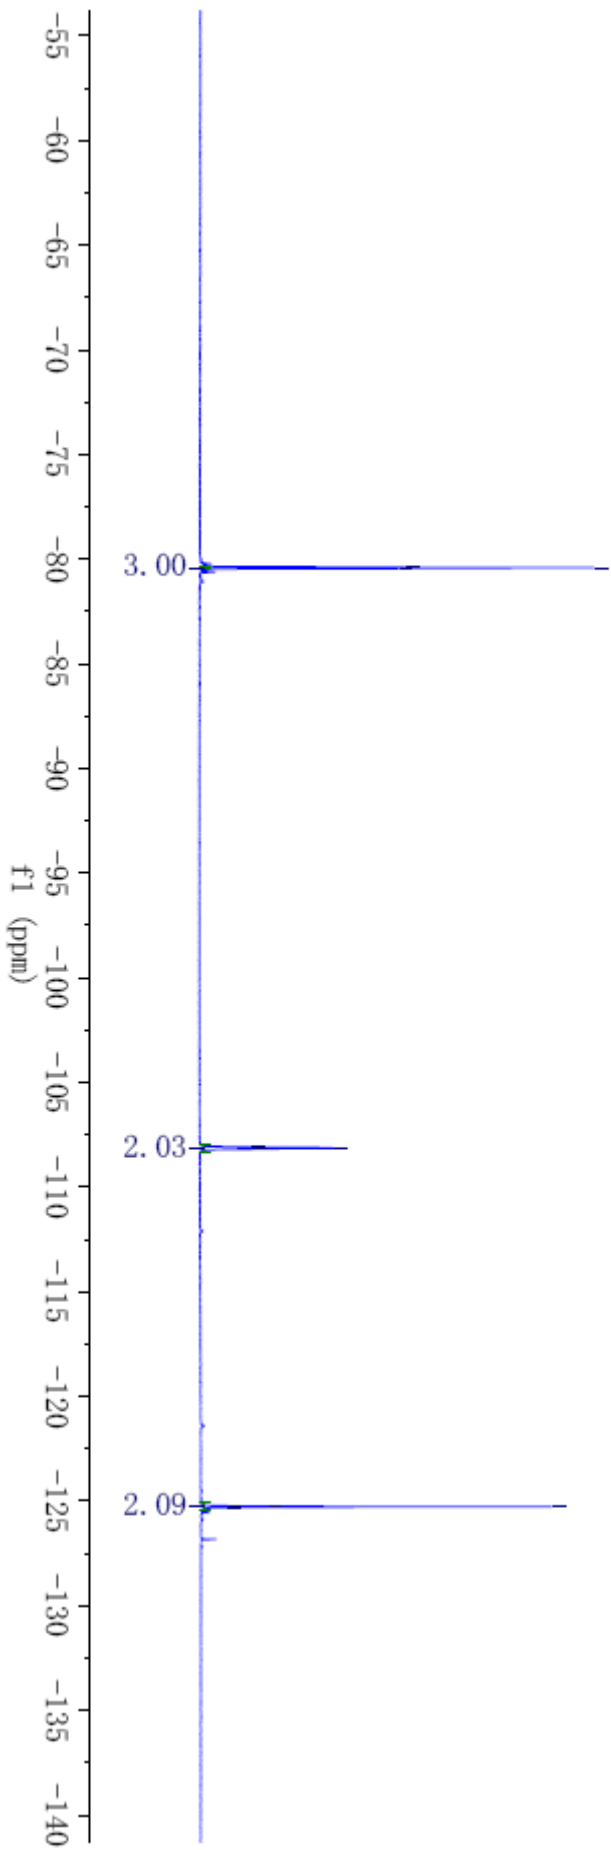



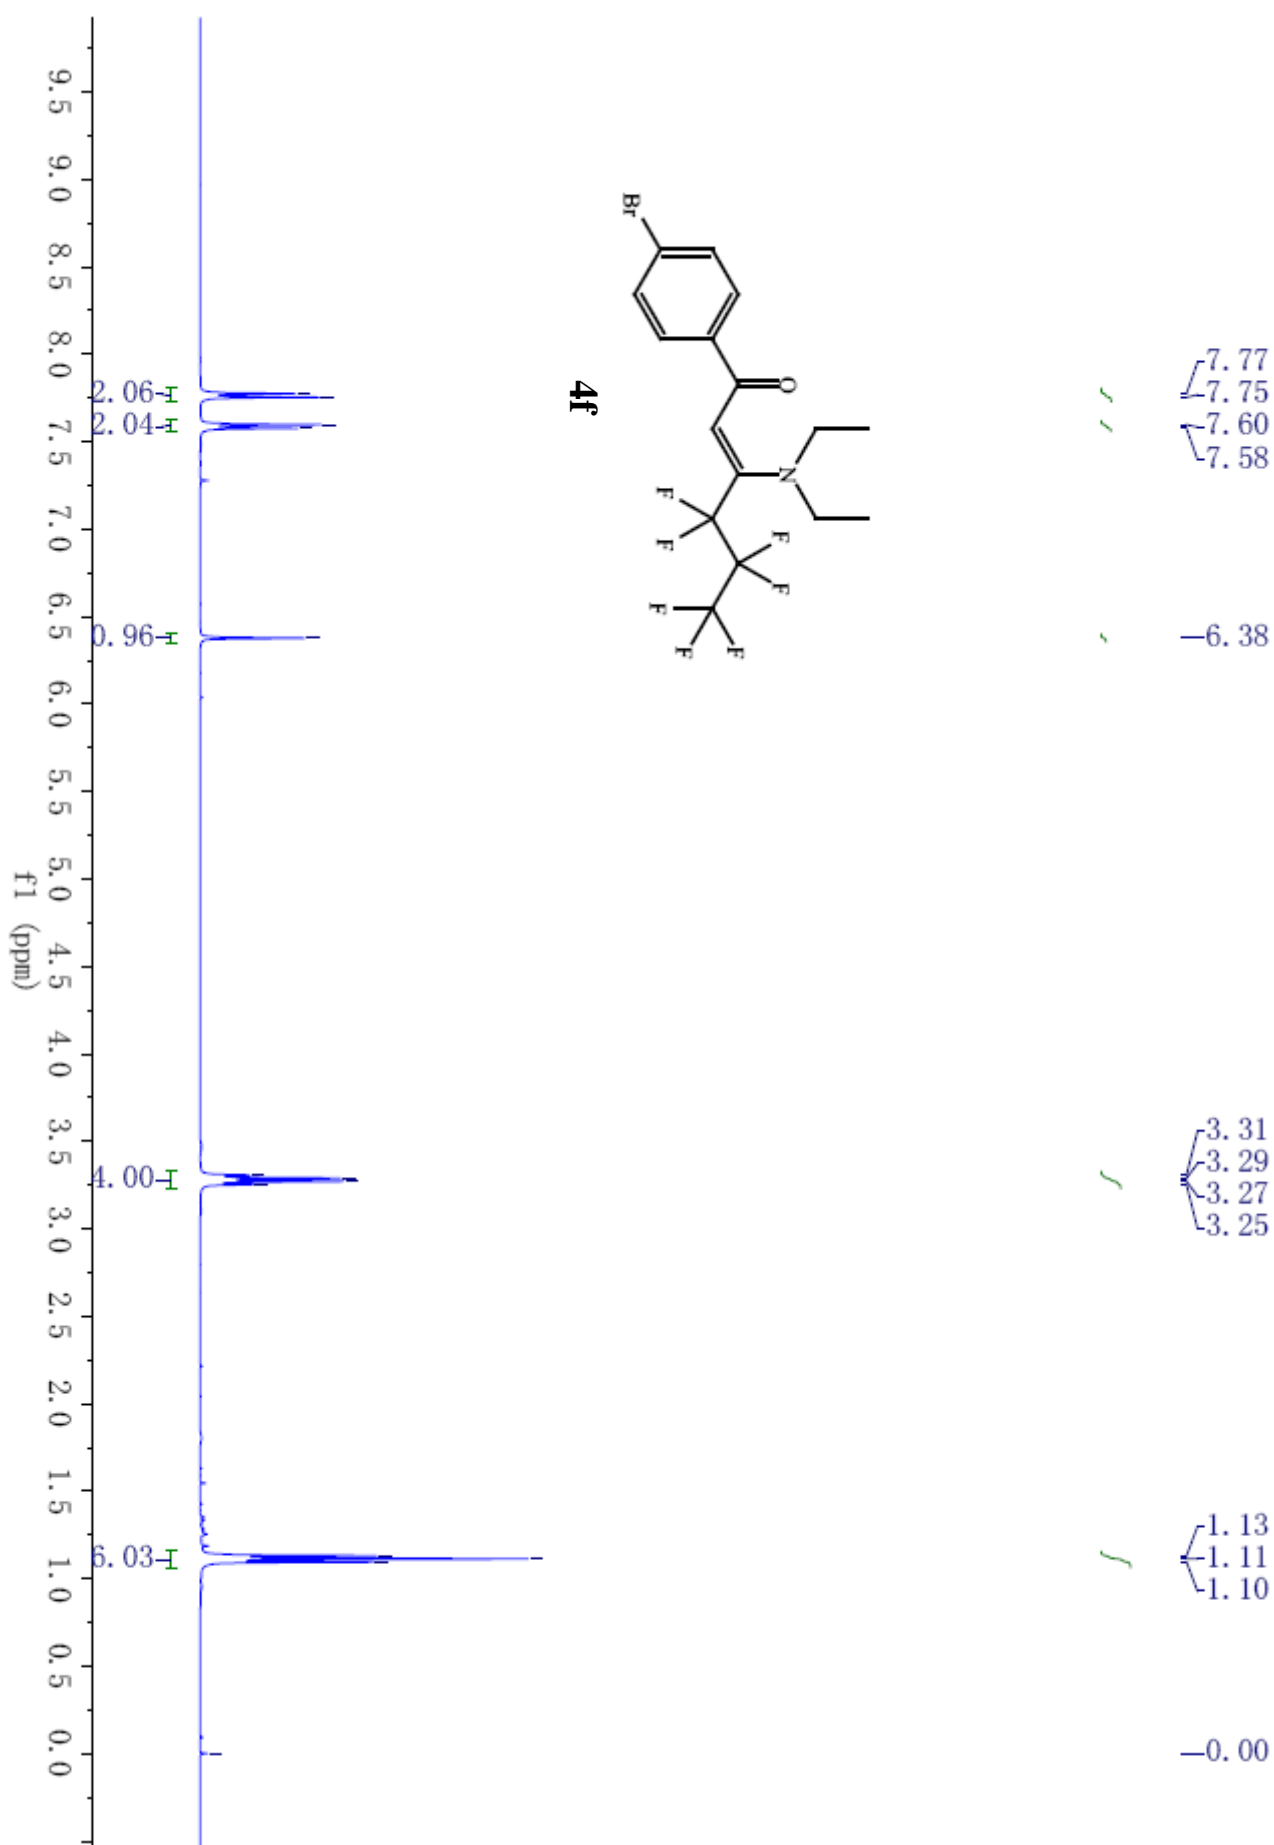

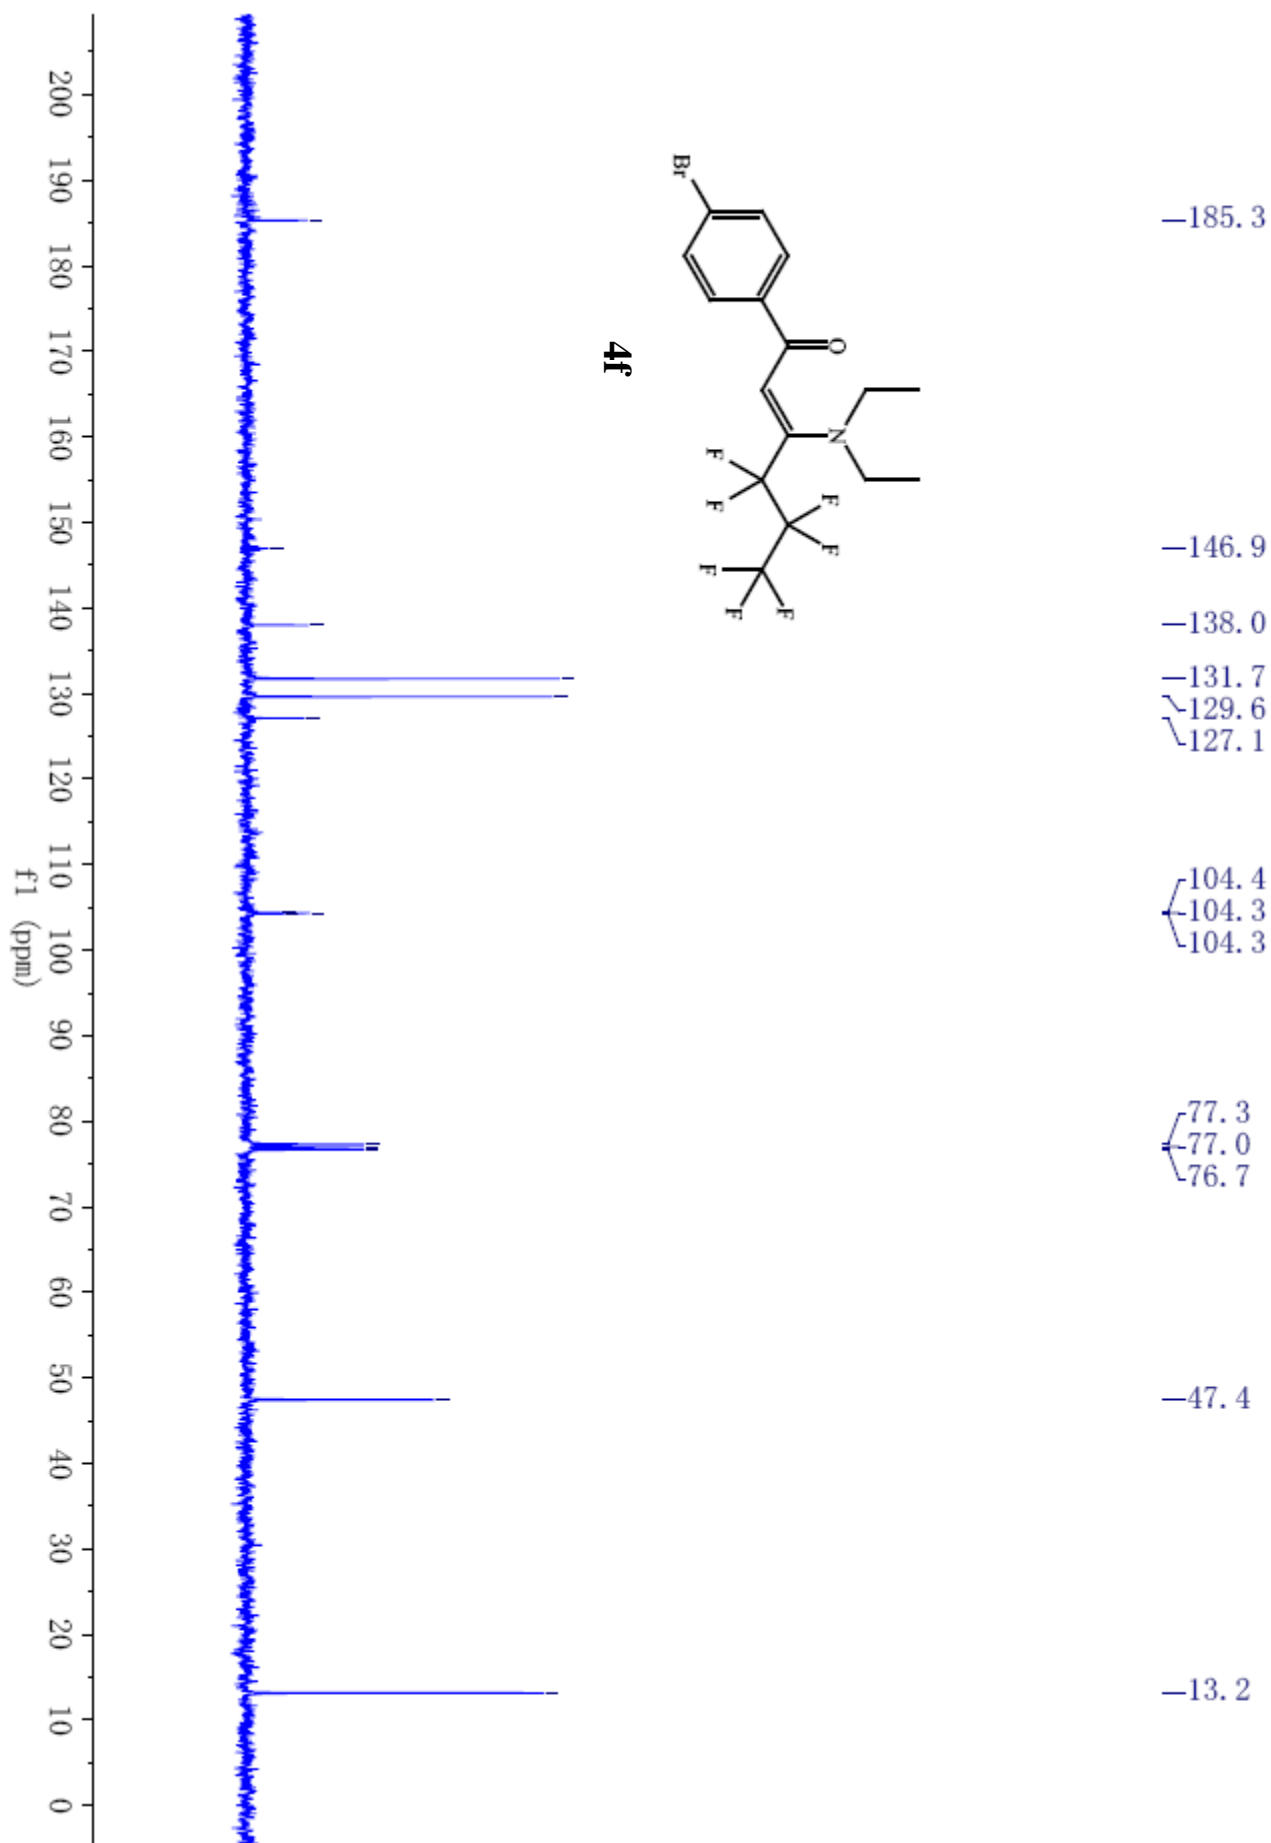

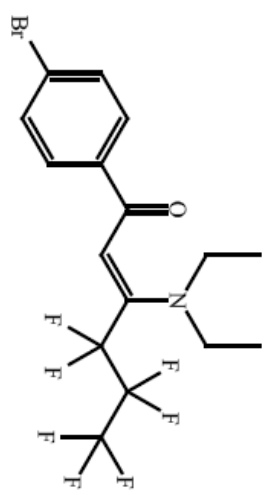

4f

80.33  
80.37  
80.40

108.06  
108.10  
108.14  
108.17

125.27  
125.30  
125.32  
125.37

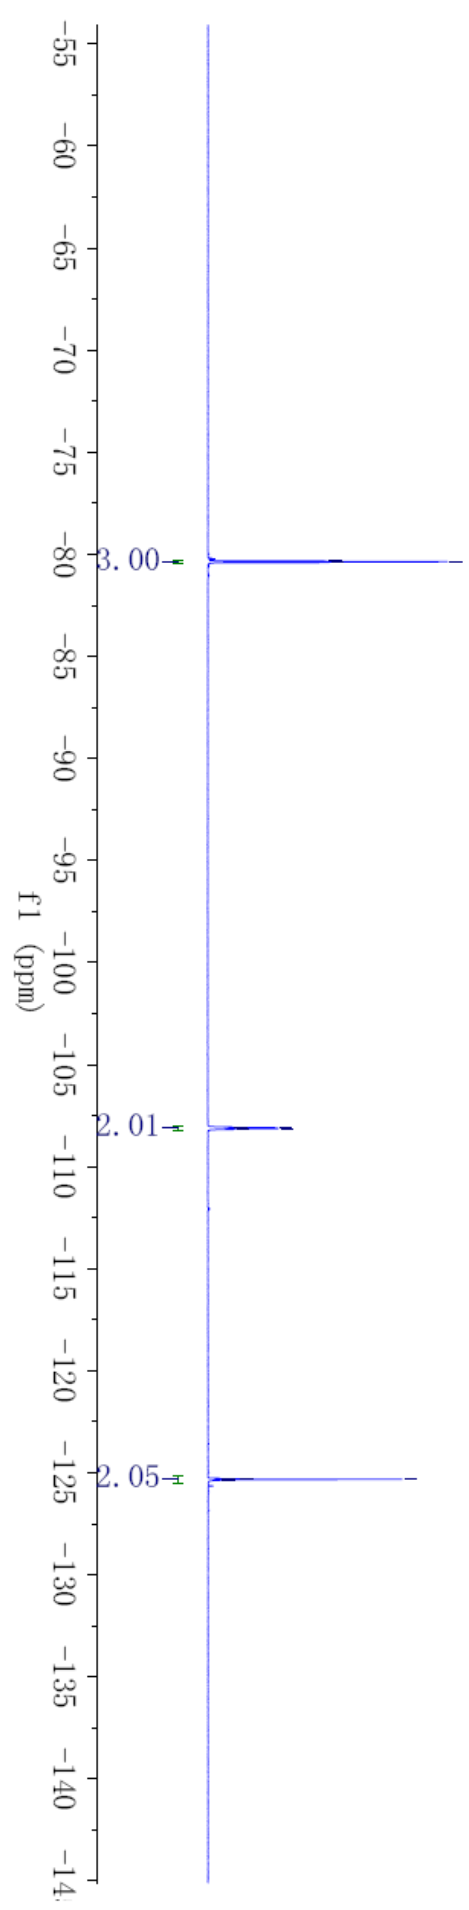

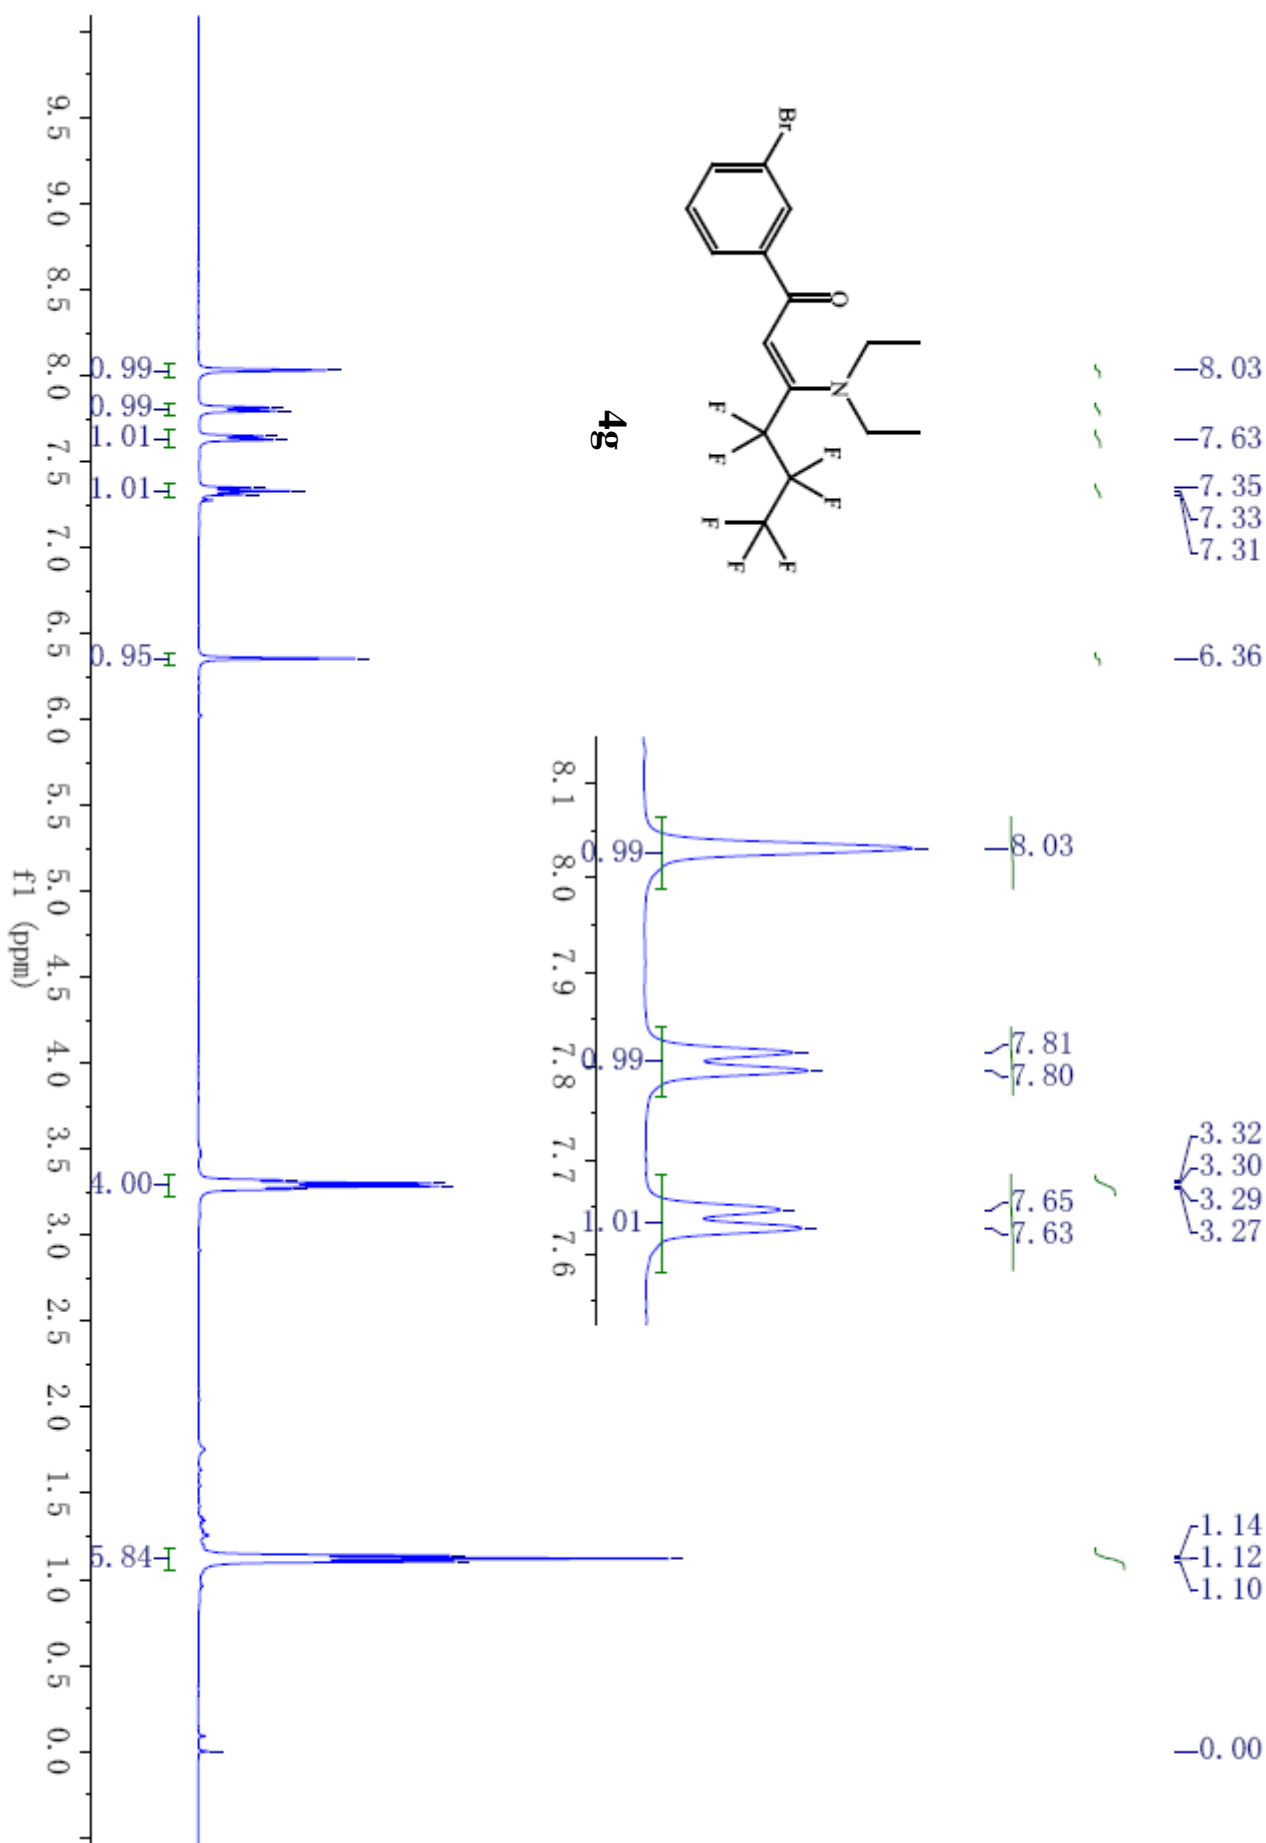

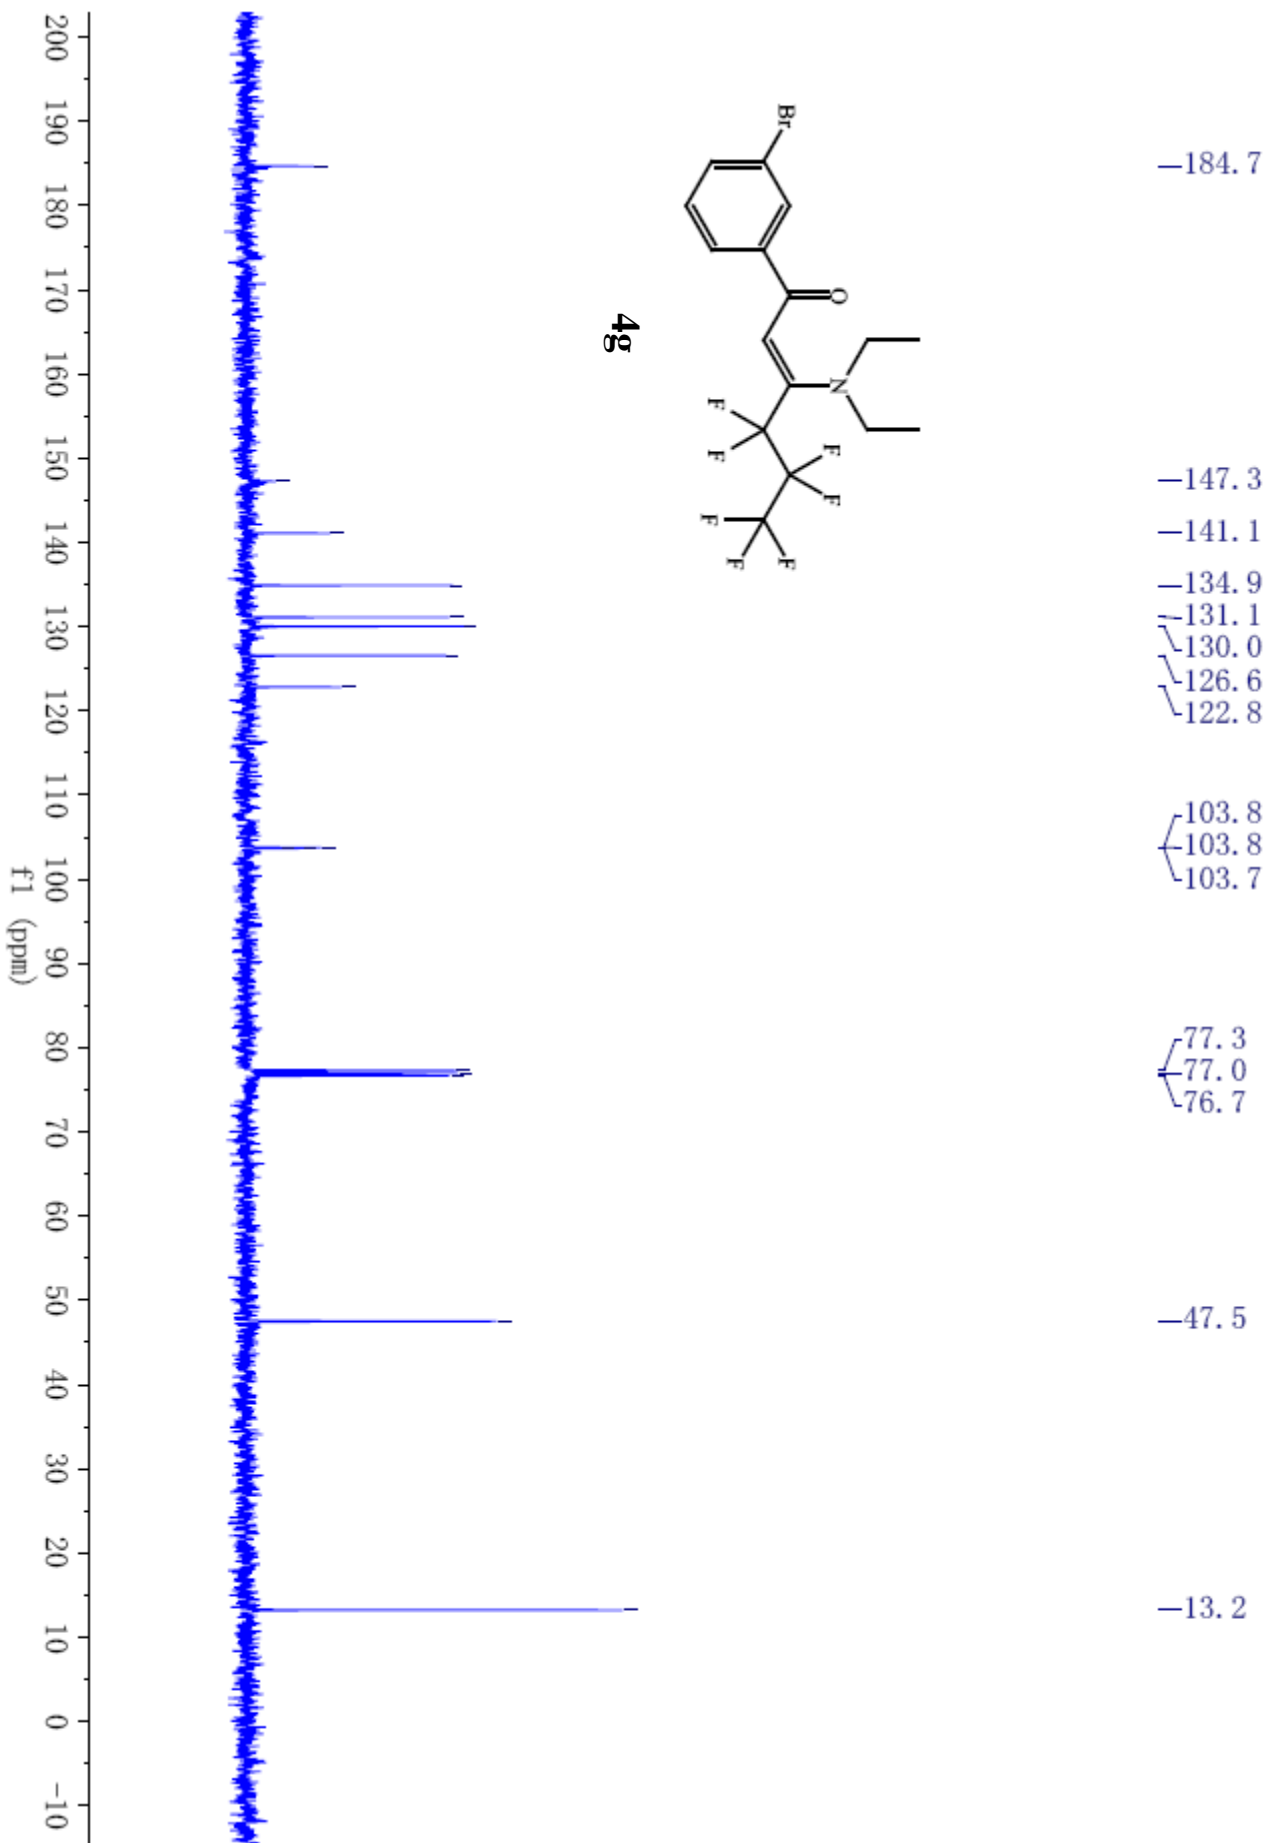

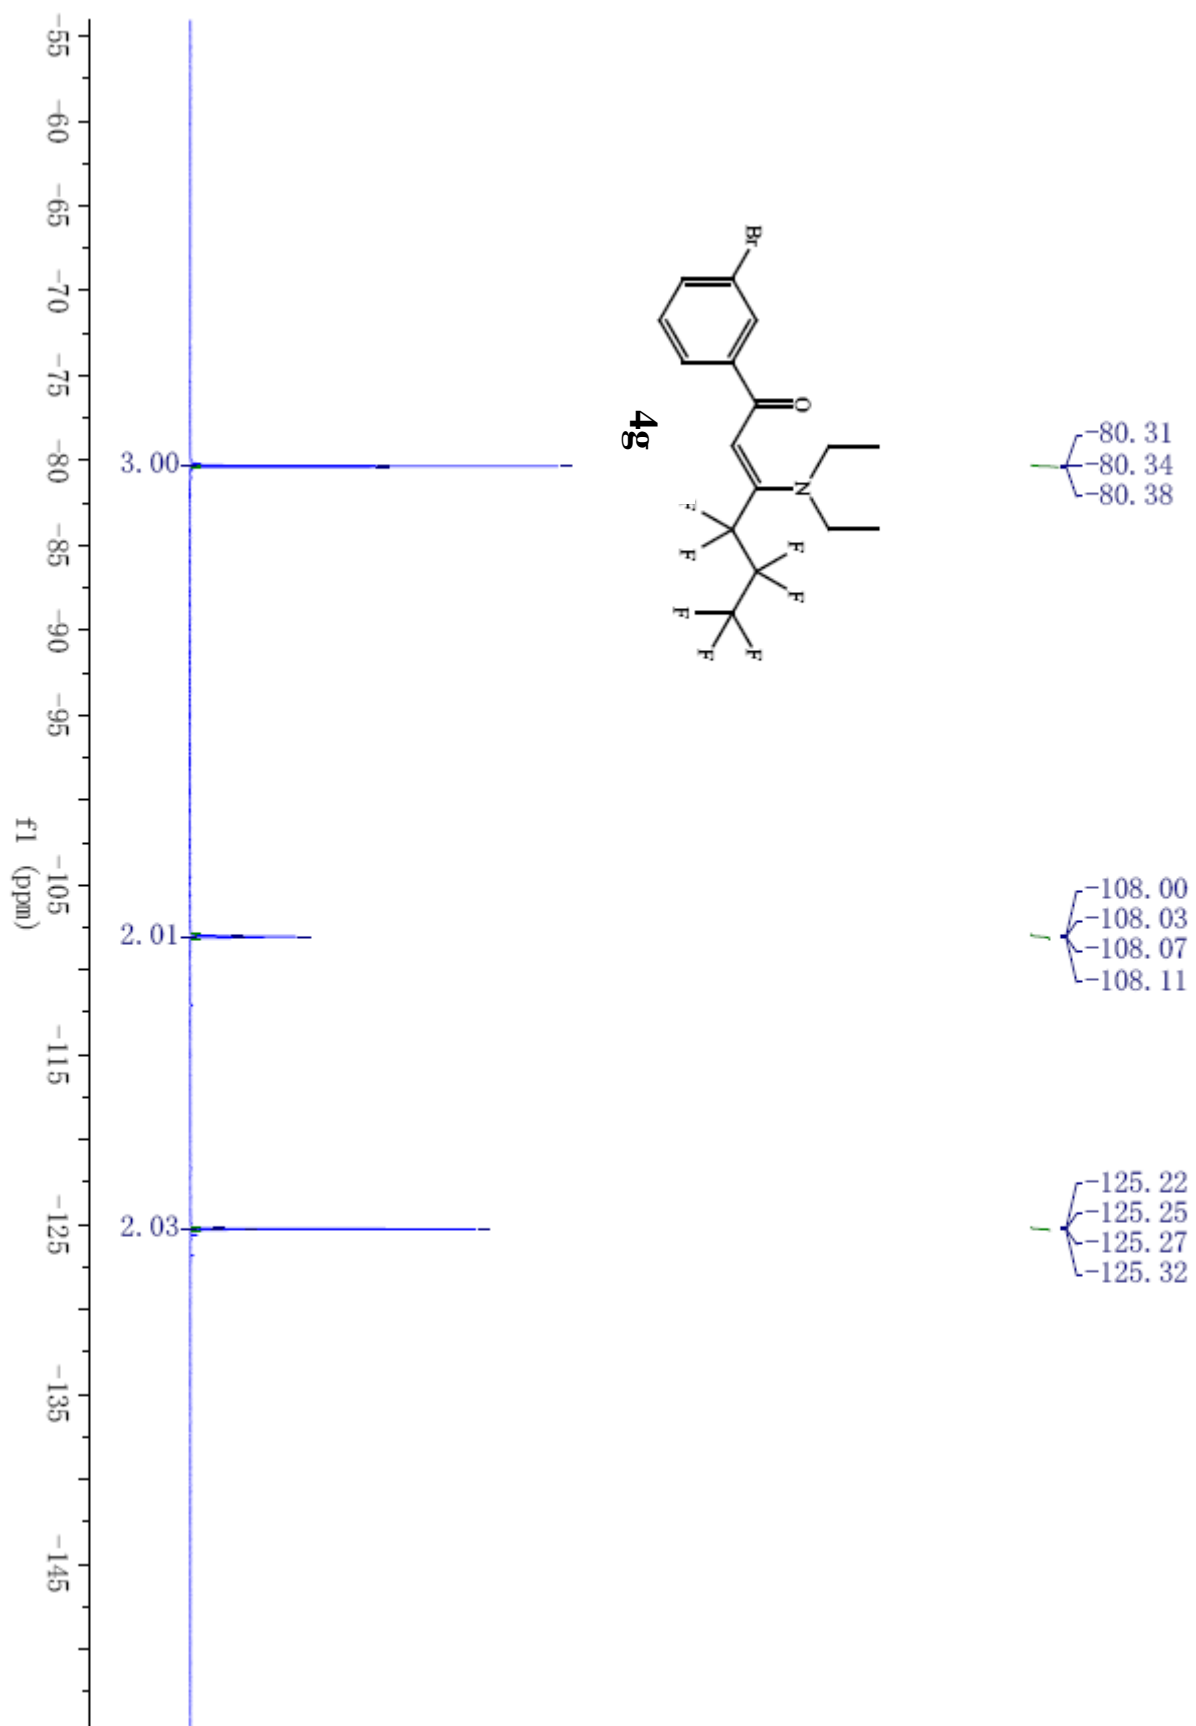

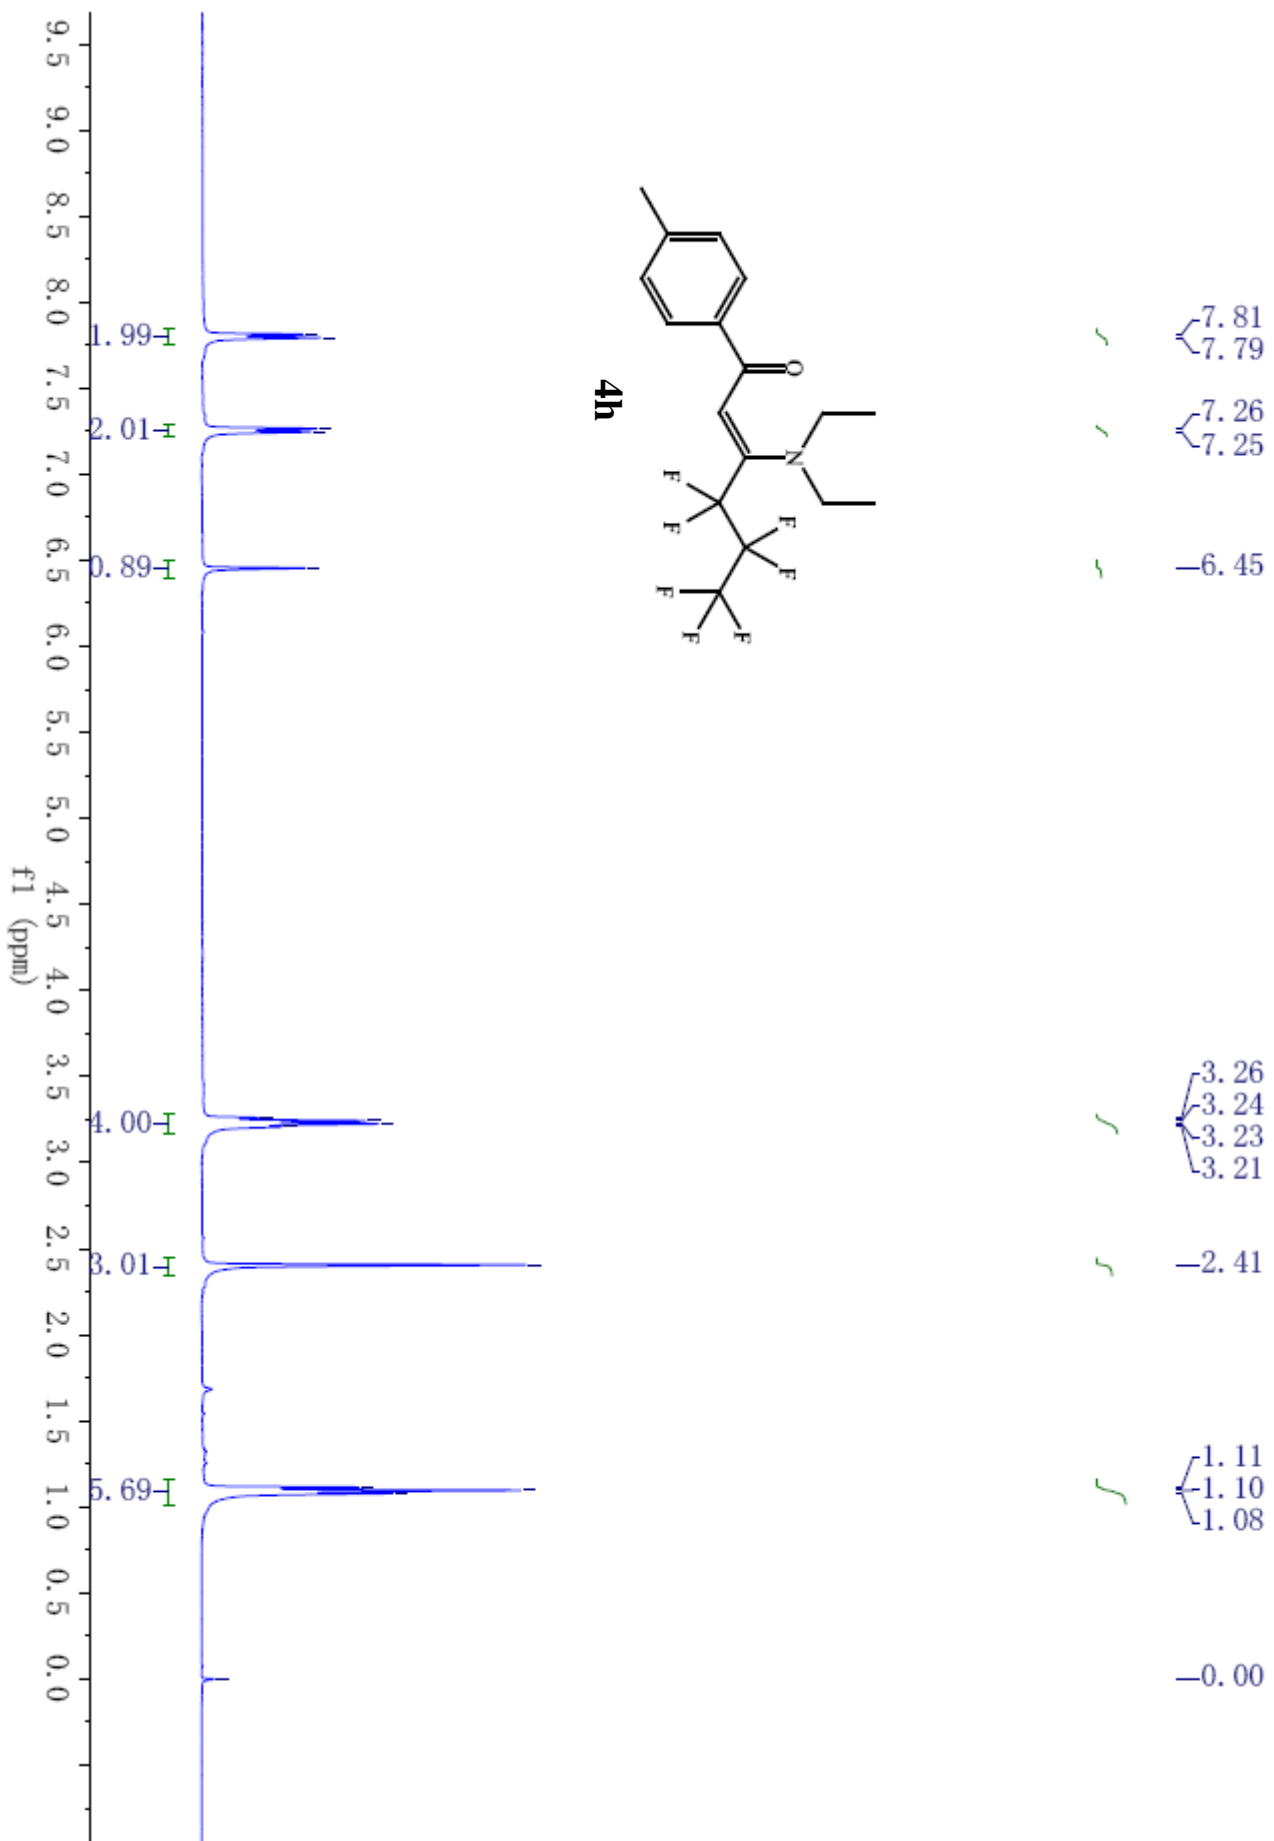

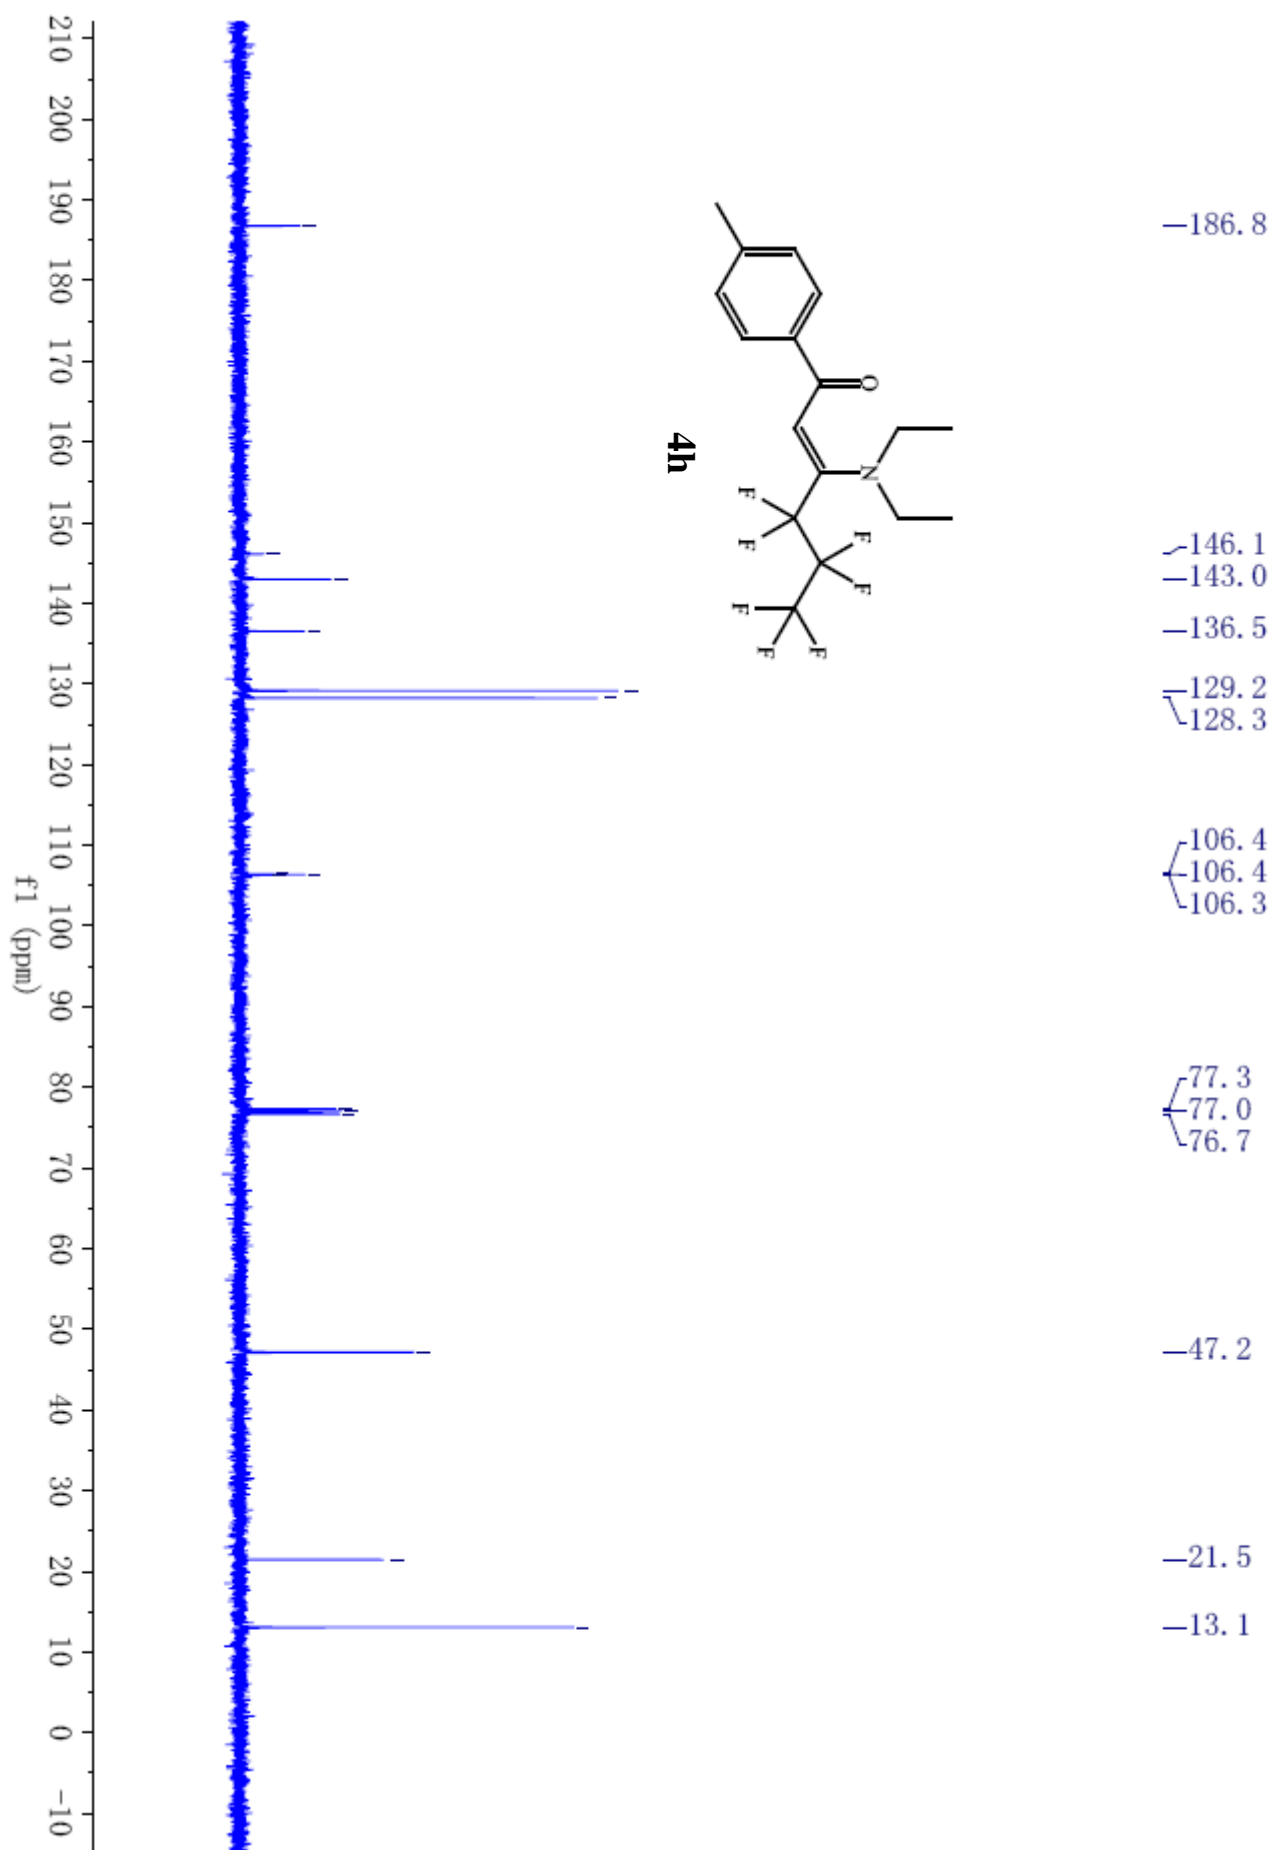



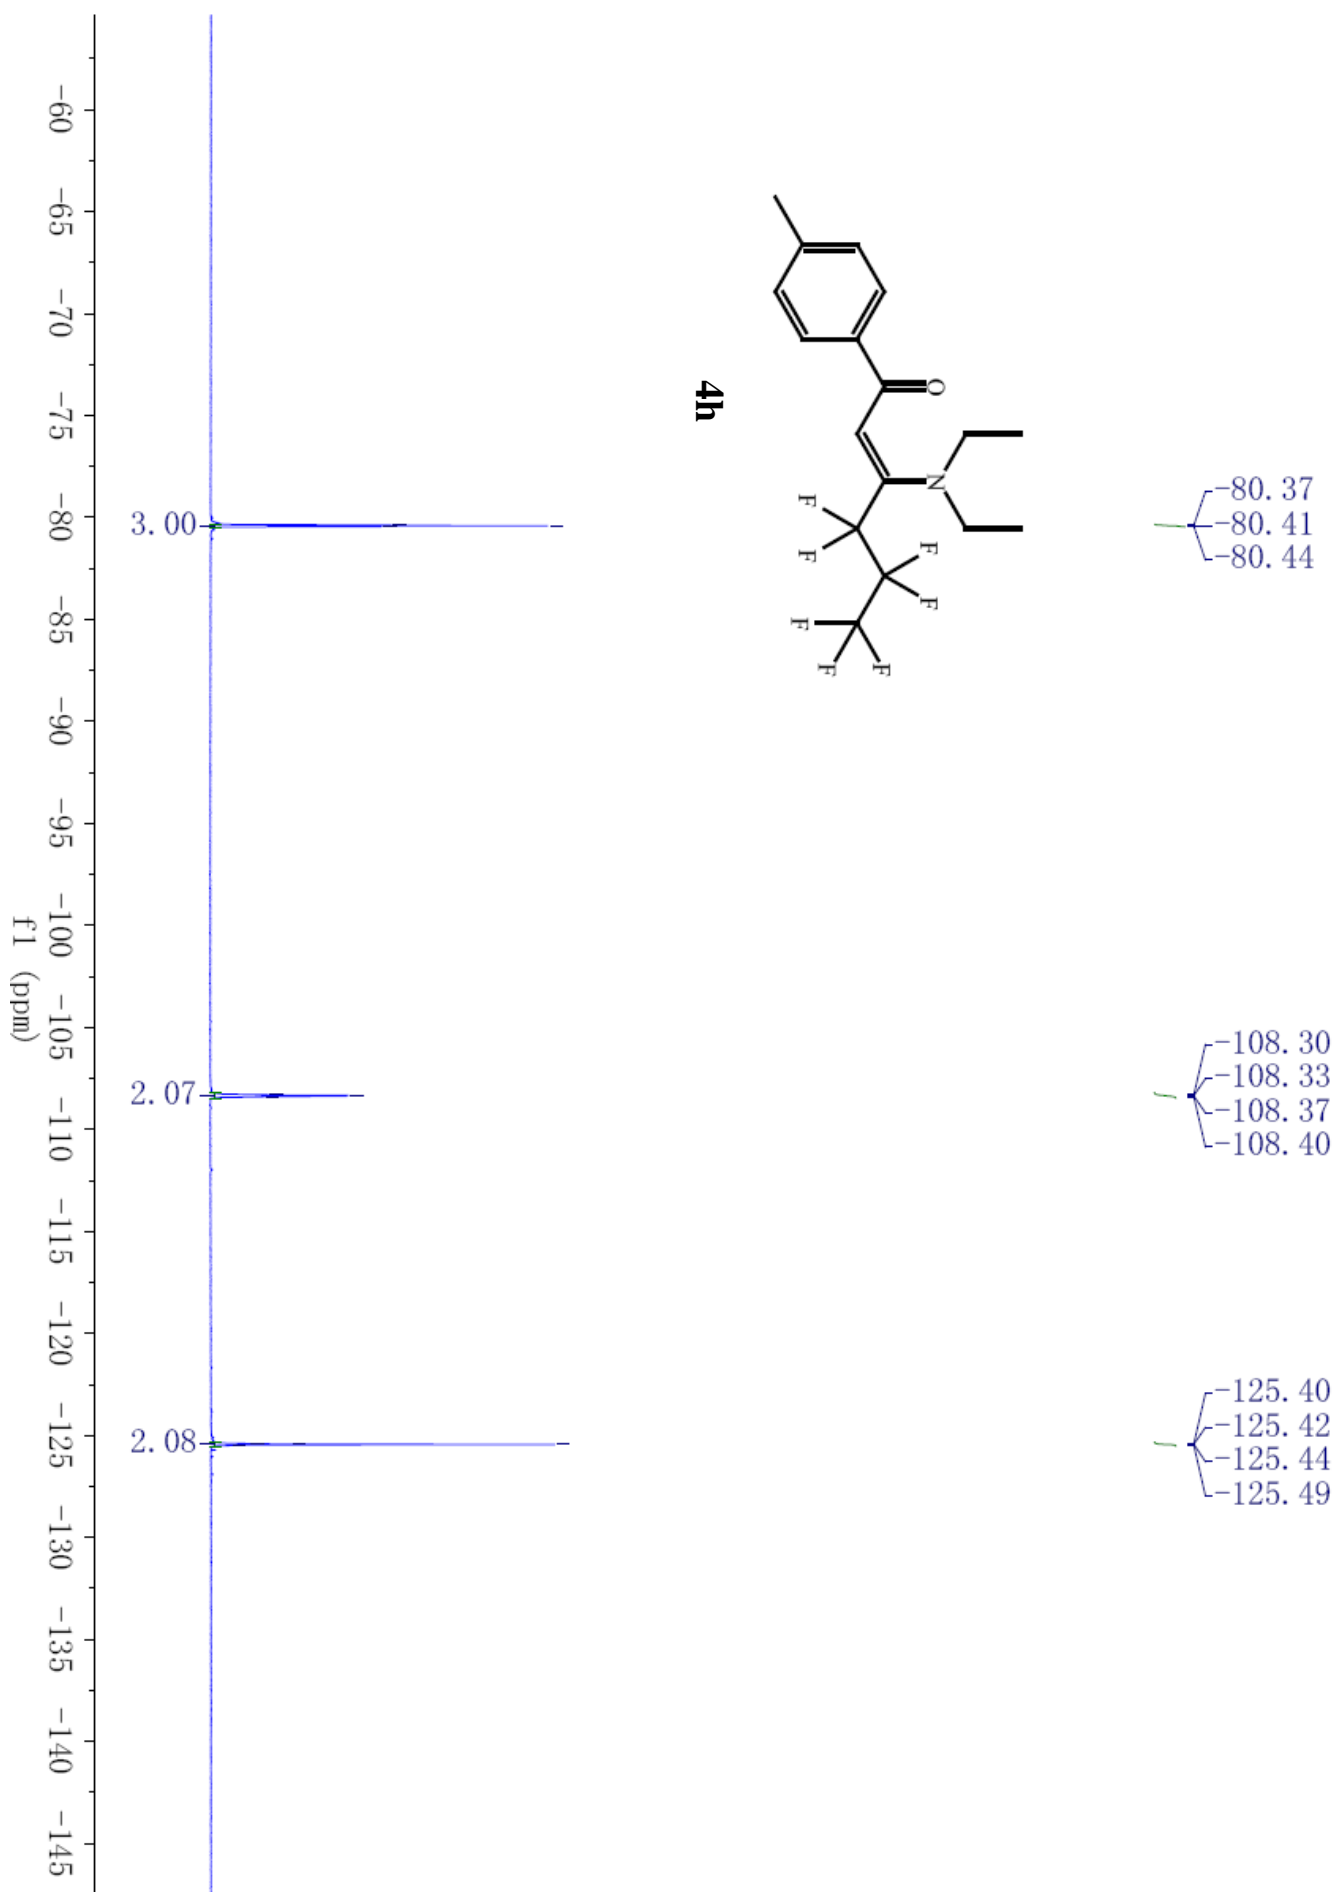

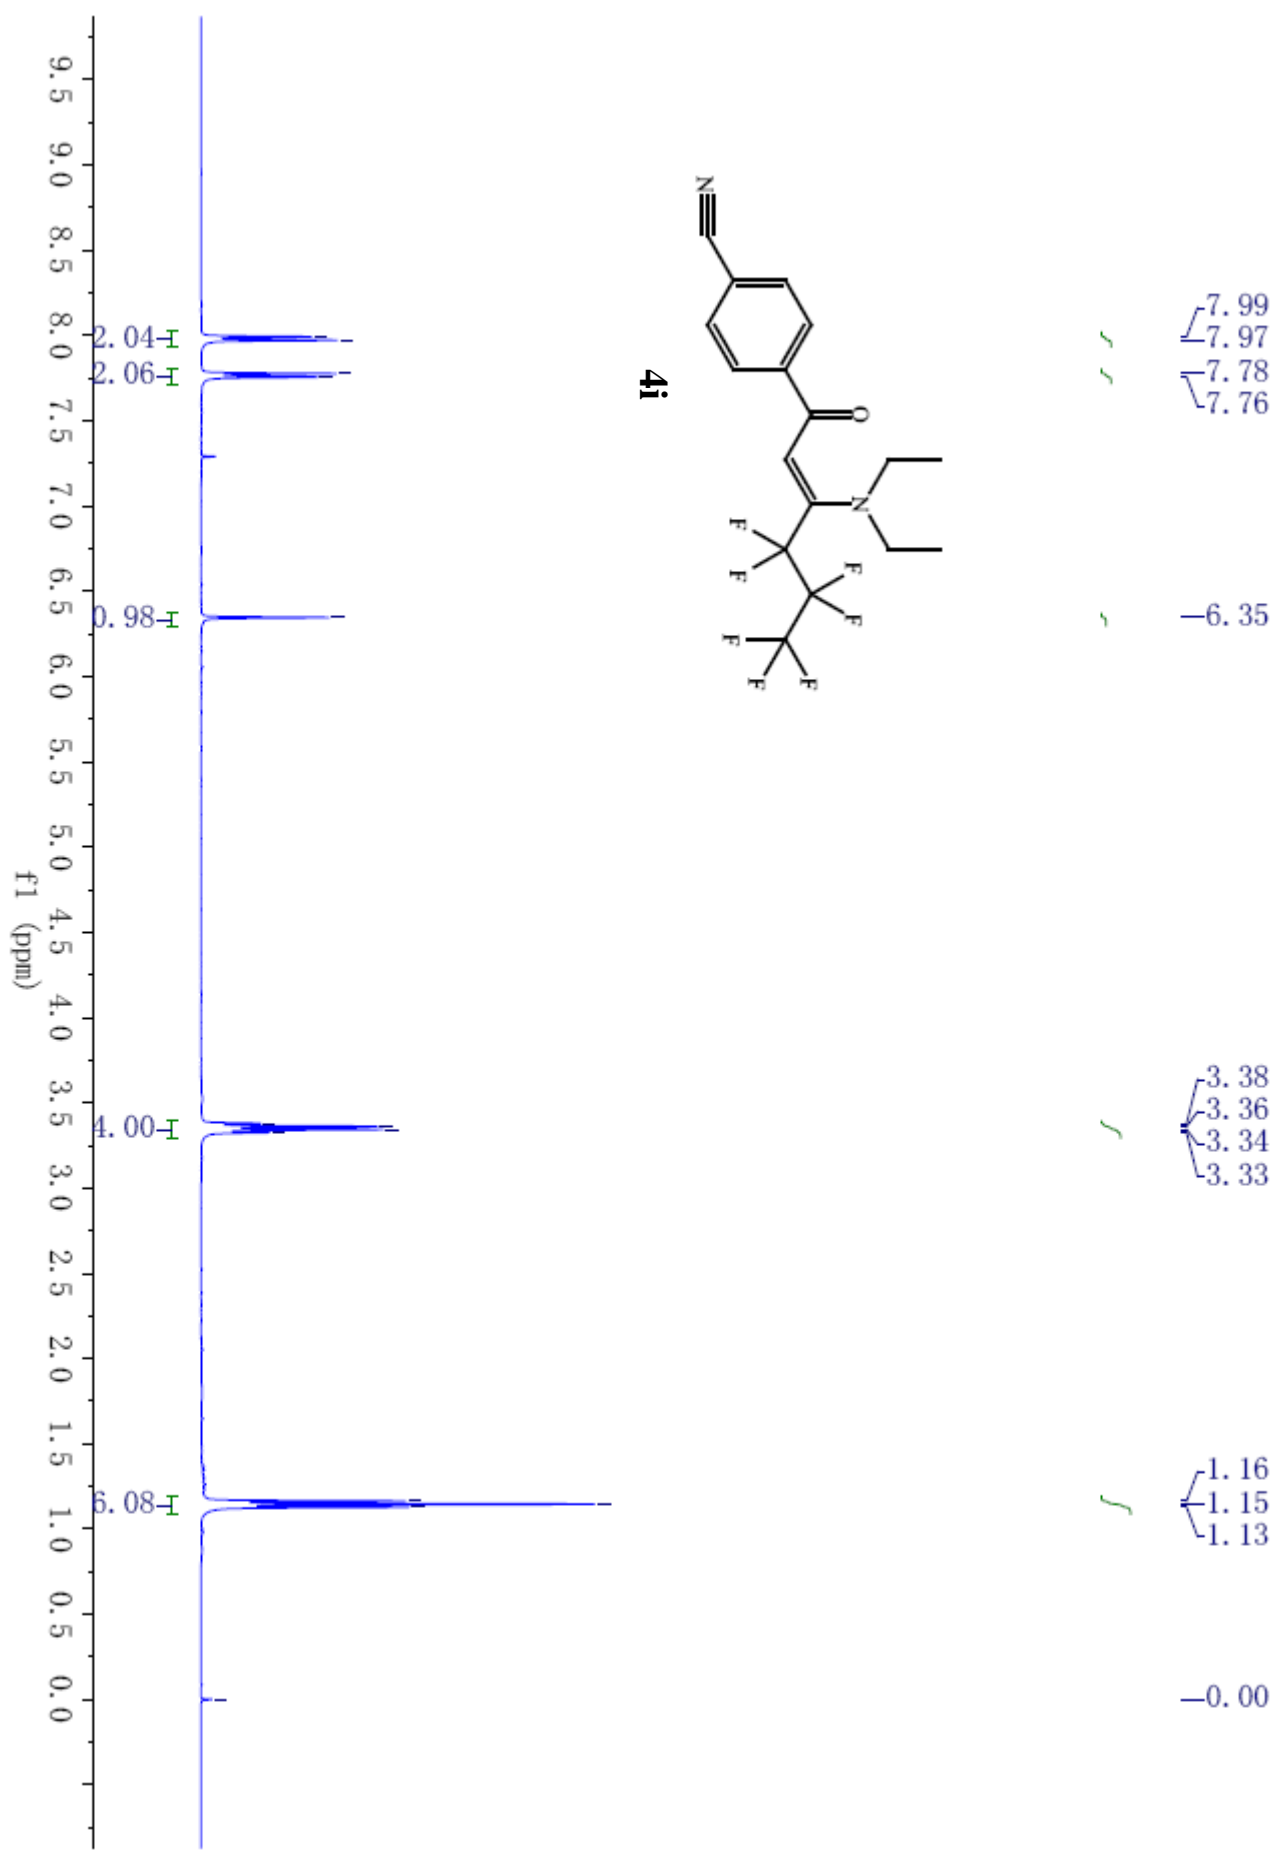

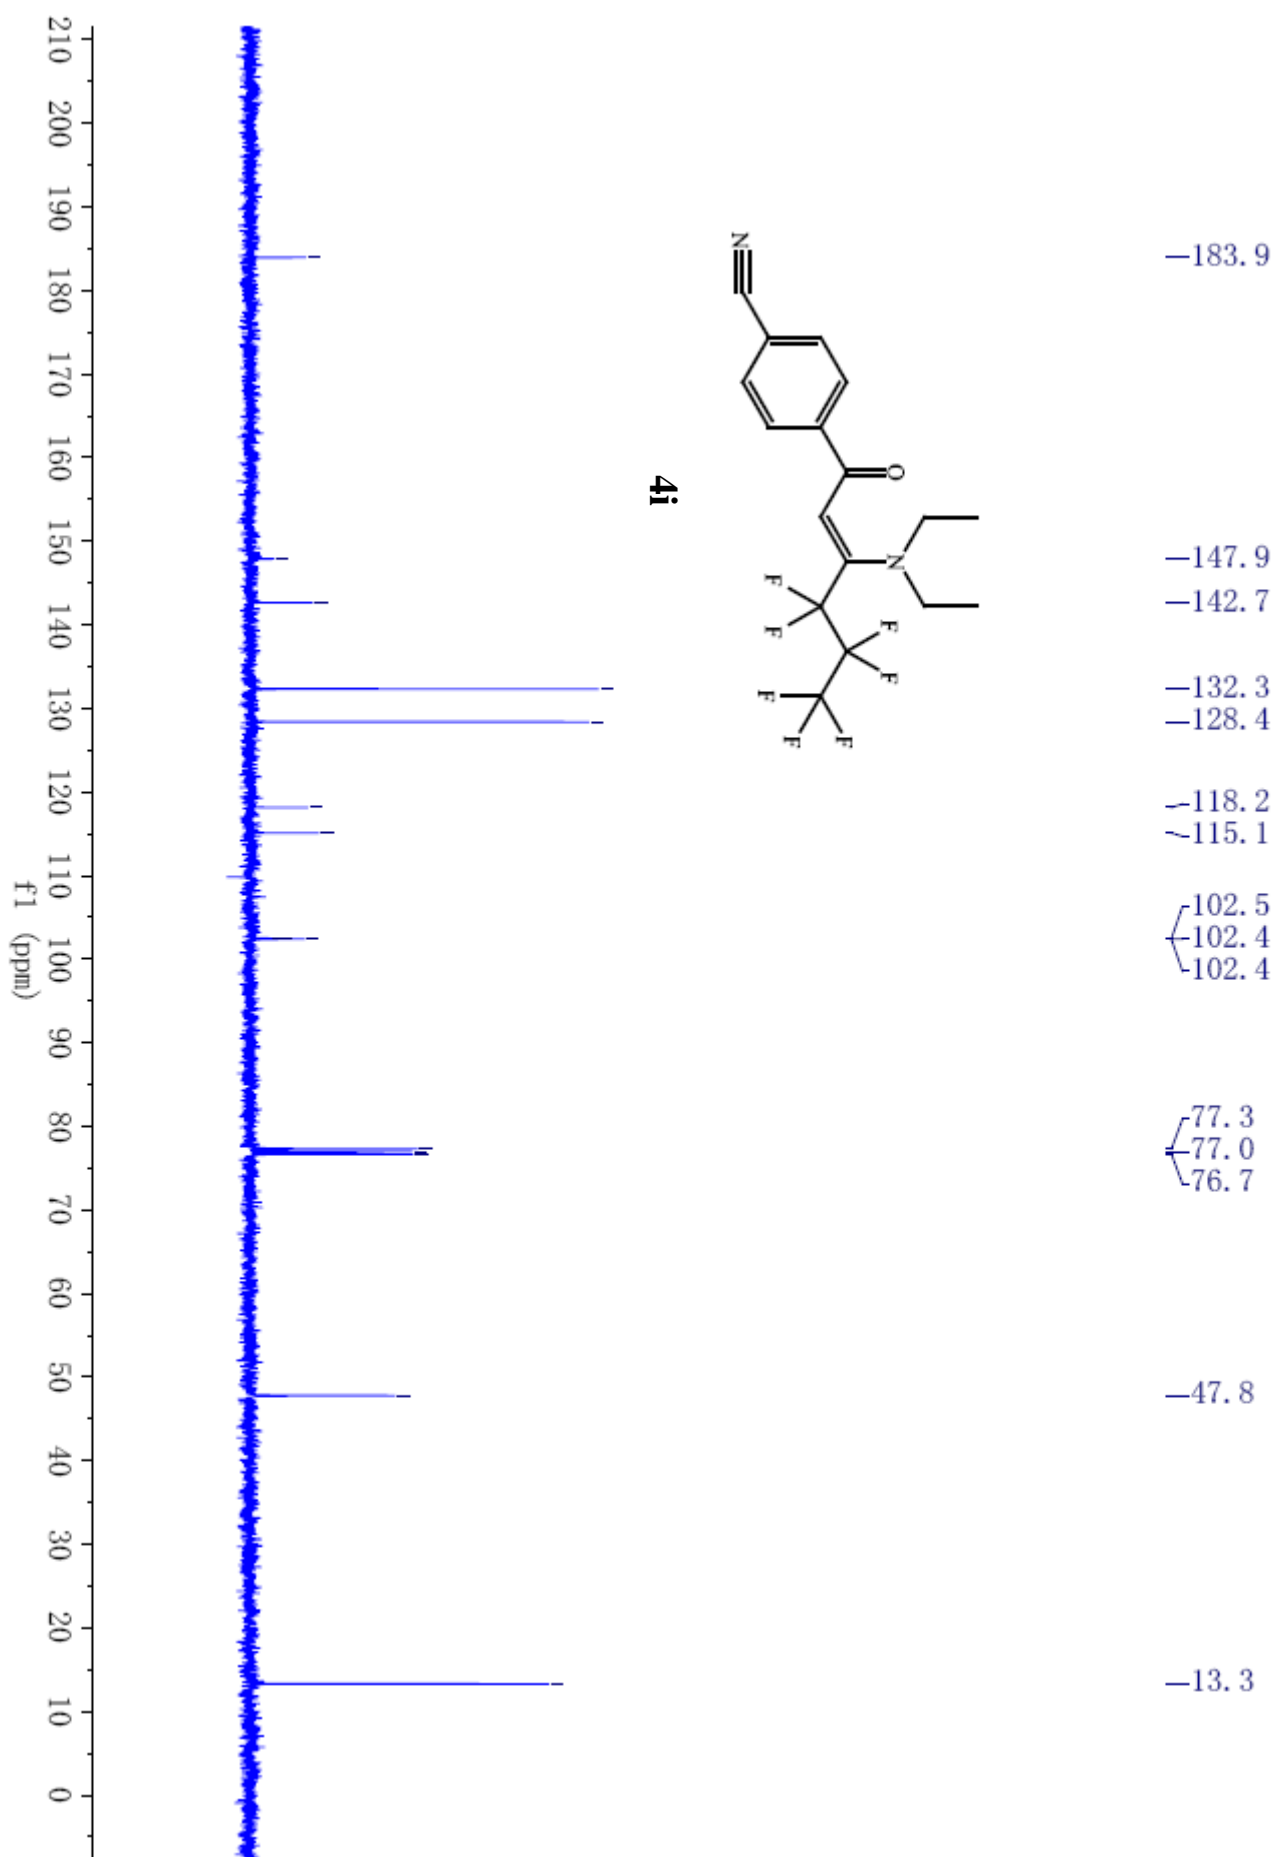

4i

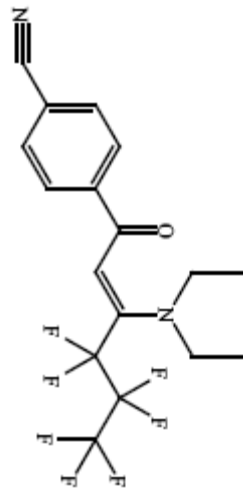

-80.27  
-80.31  
-80.35

-107.85  
-107.88  
-107.92  
-107.96

-125.11  
-125.14  
-125.16  
-125.21

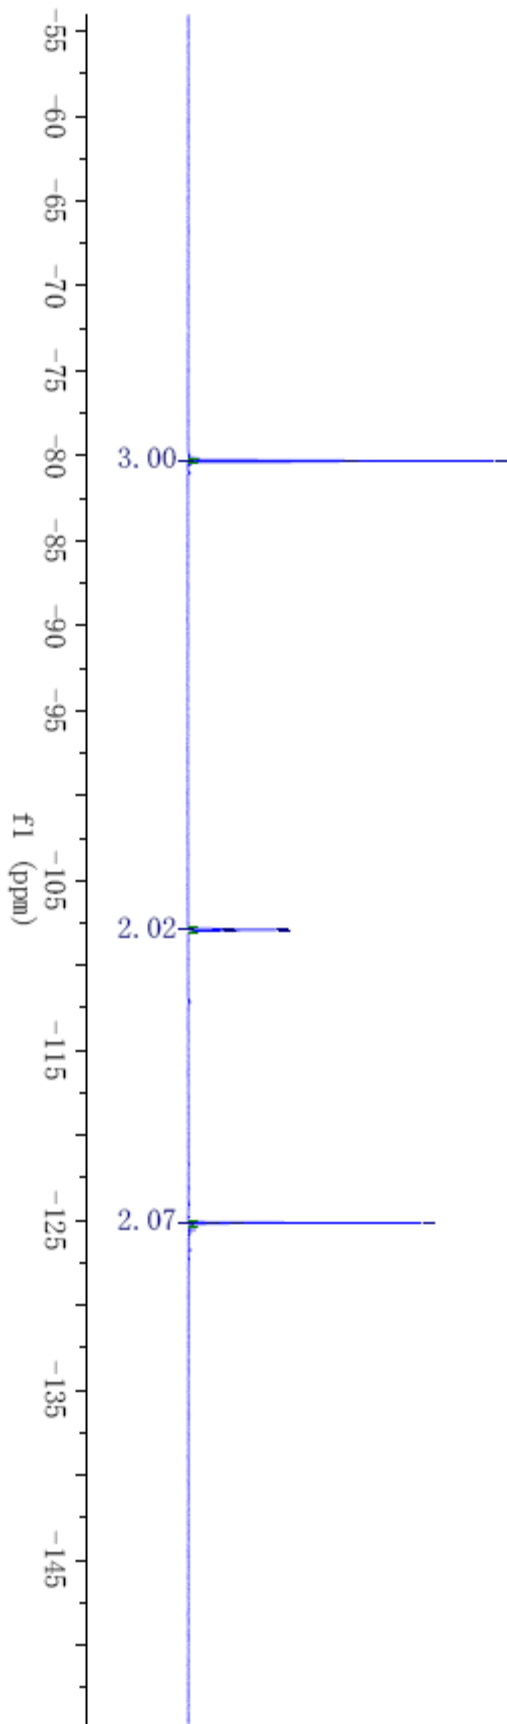

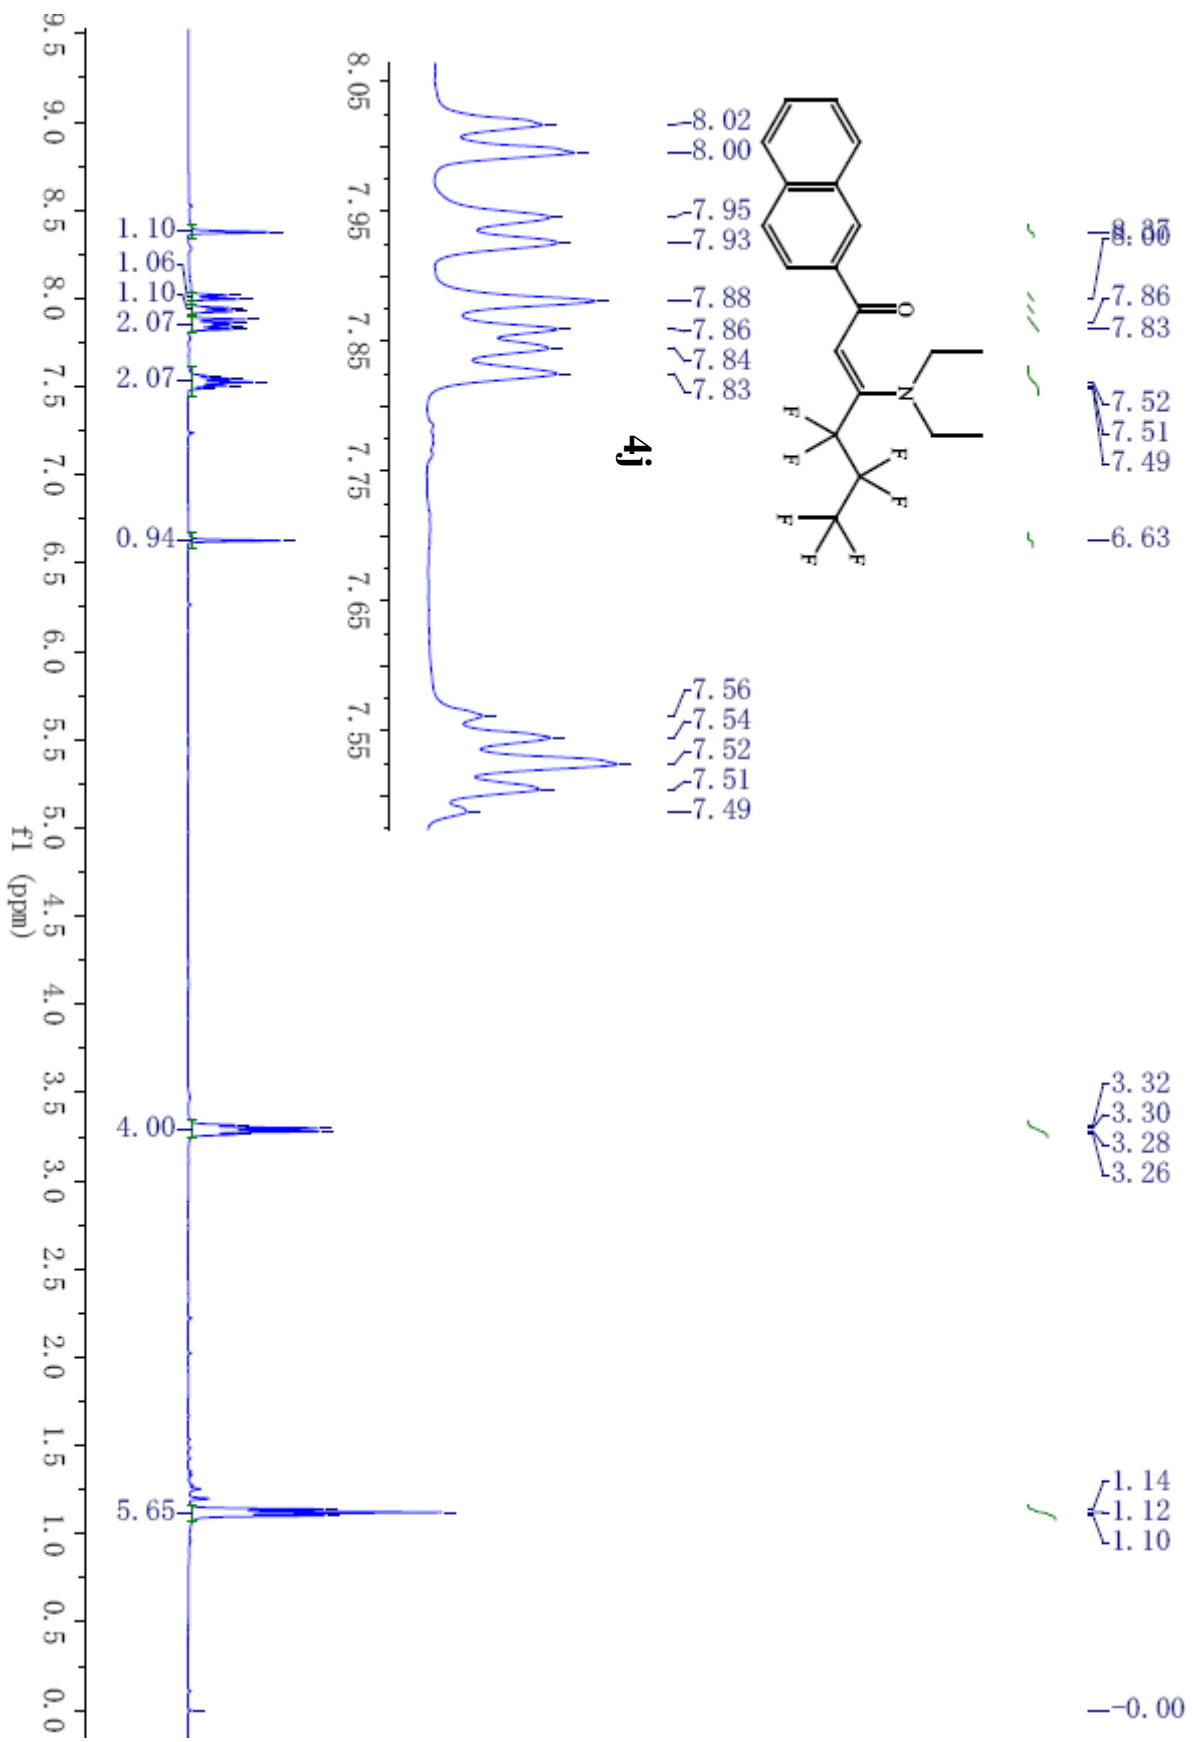

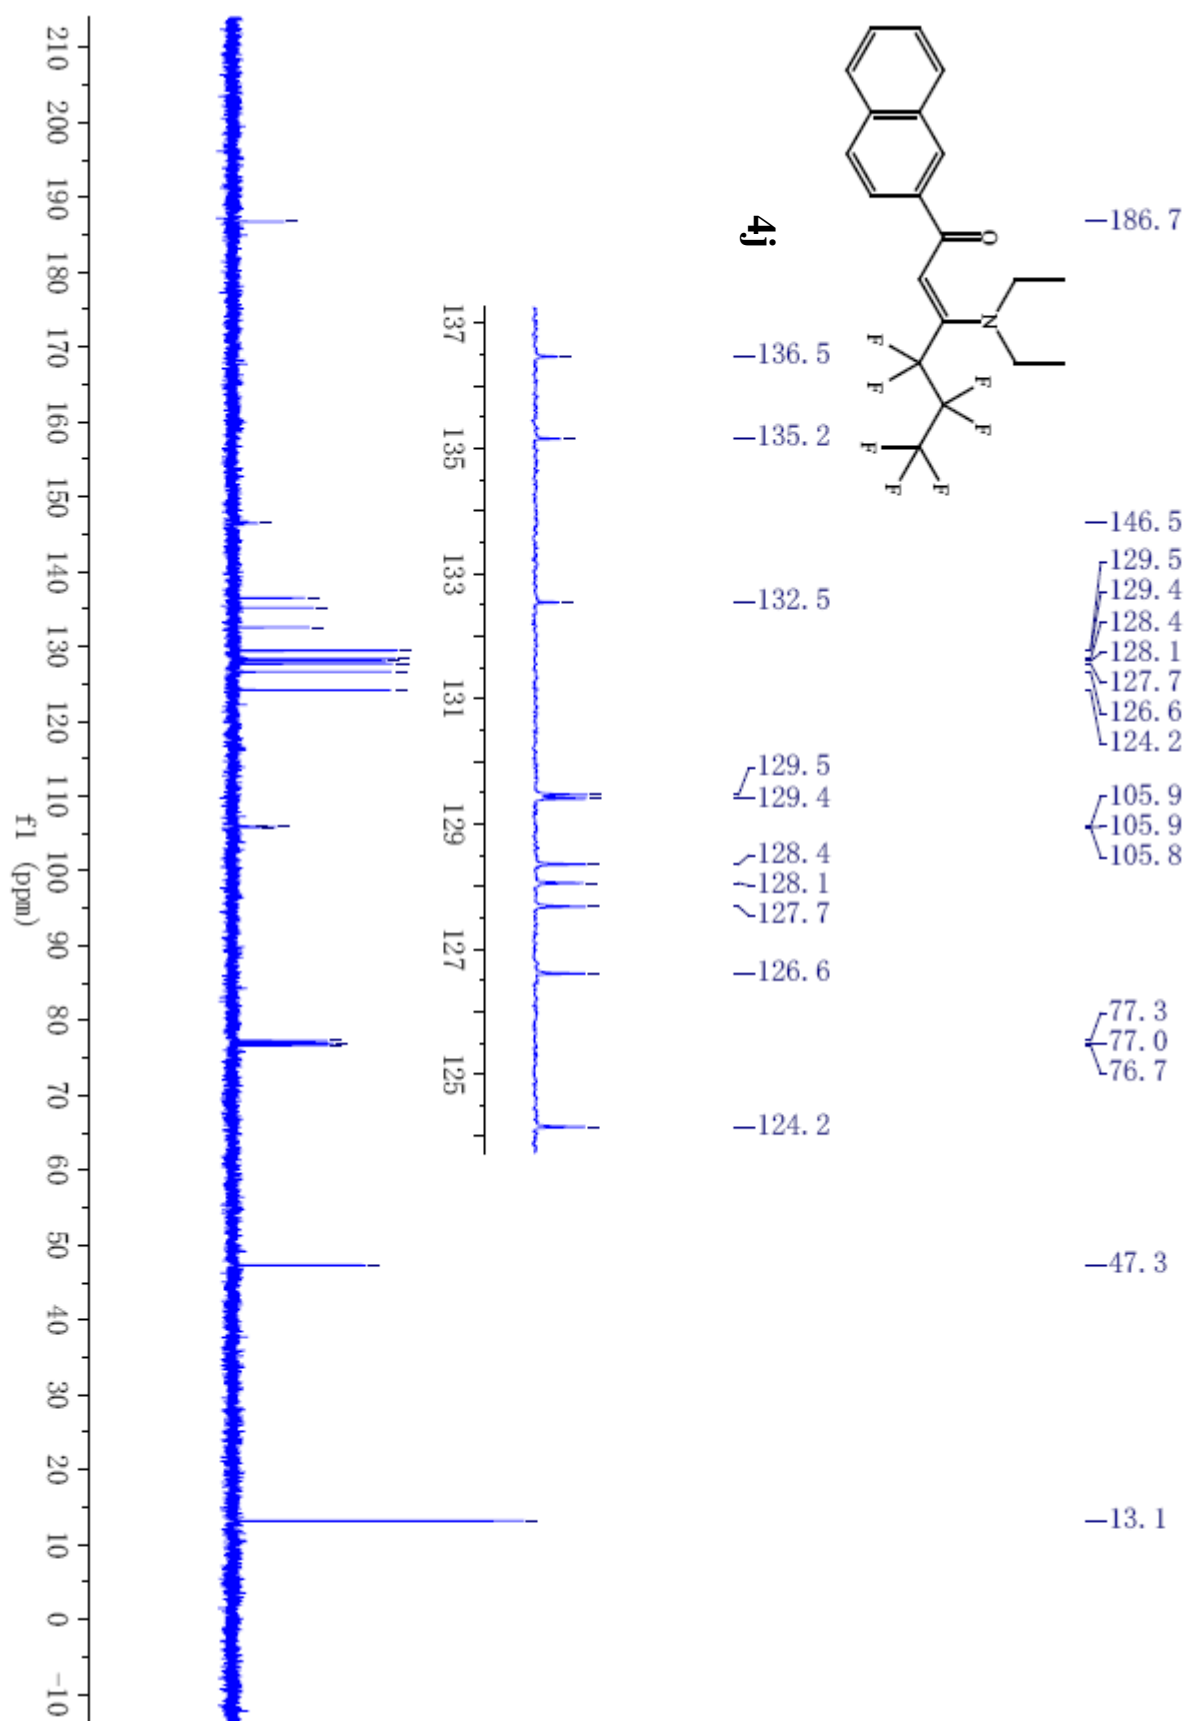

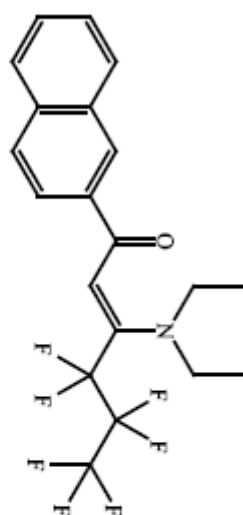

4j

80.25  
80.29  
80.32

108.08  
108.12  
108.16  
108.19

125.22  
125.25  
125.27  
125.32

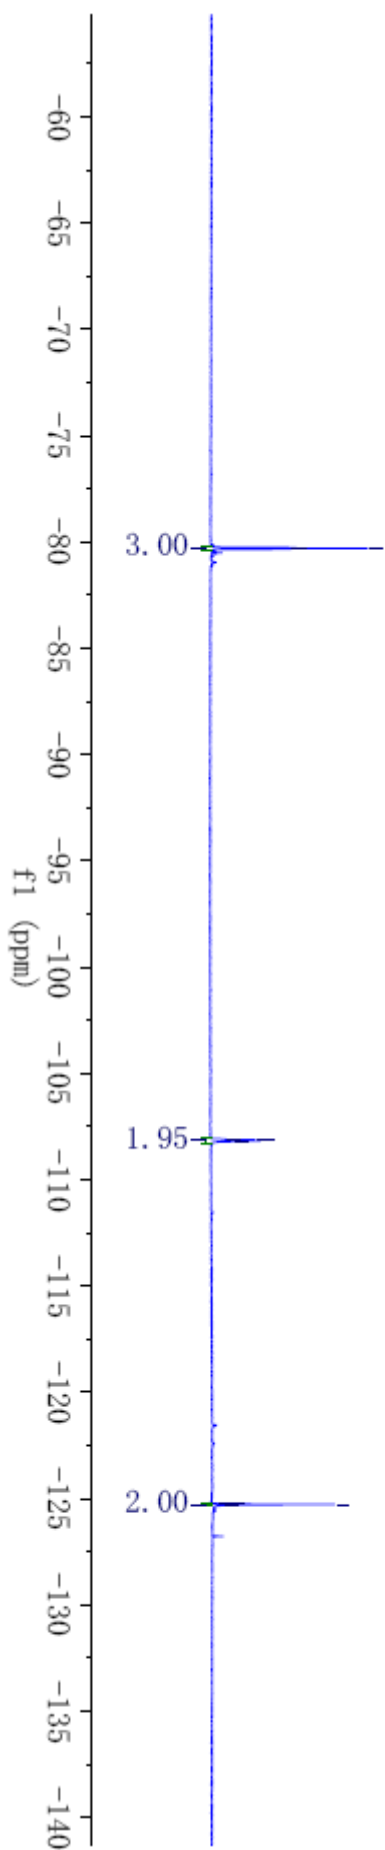

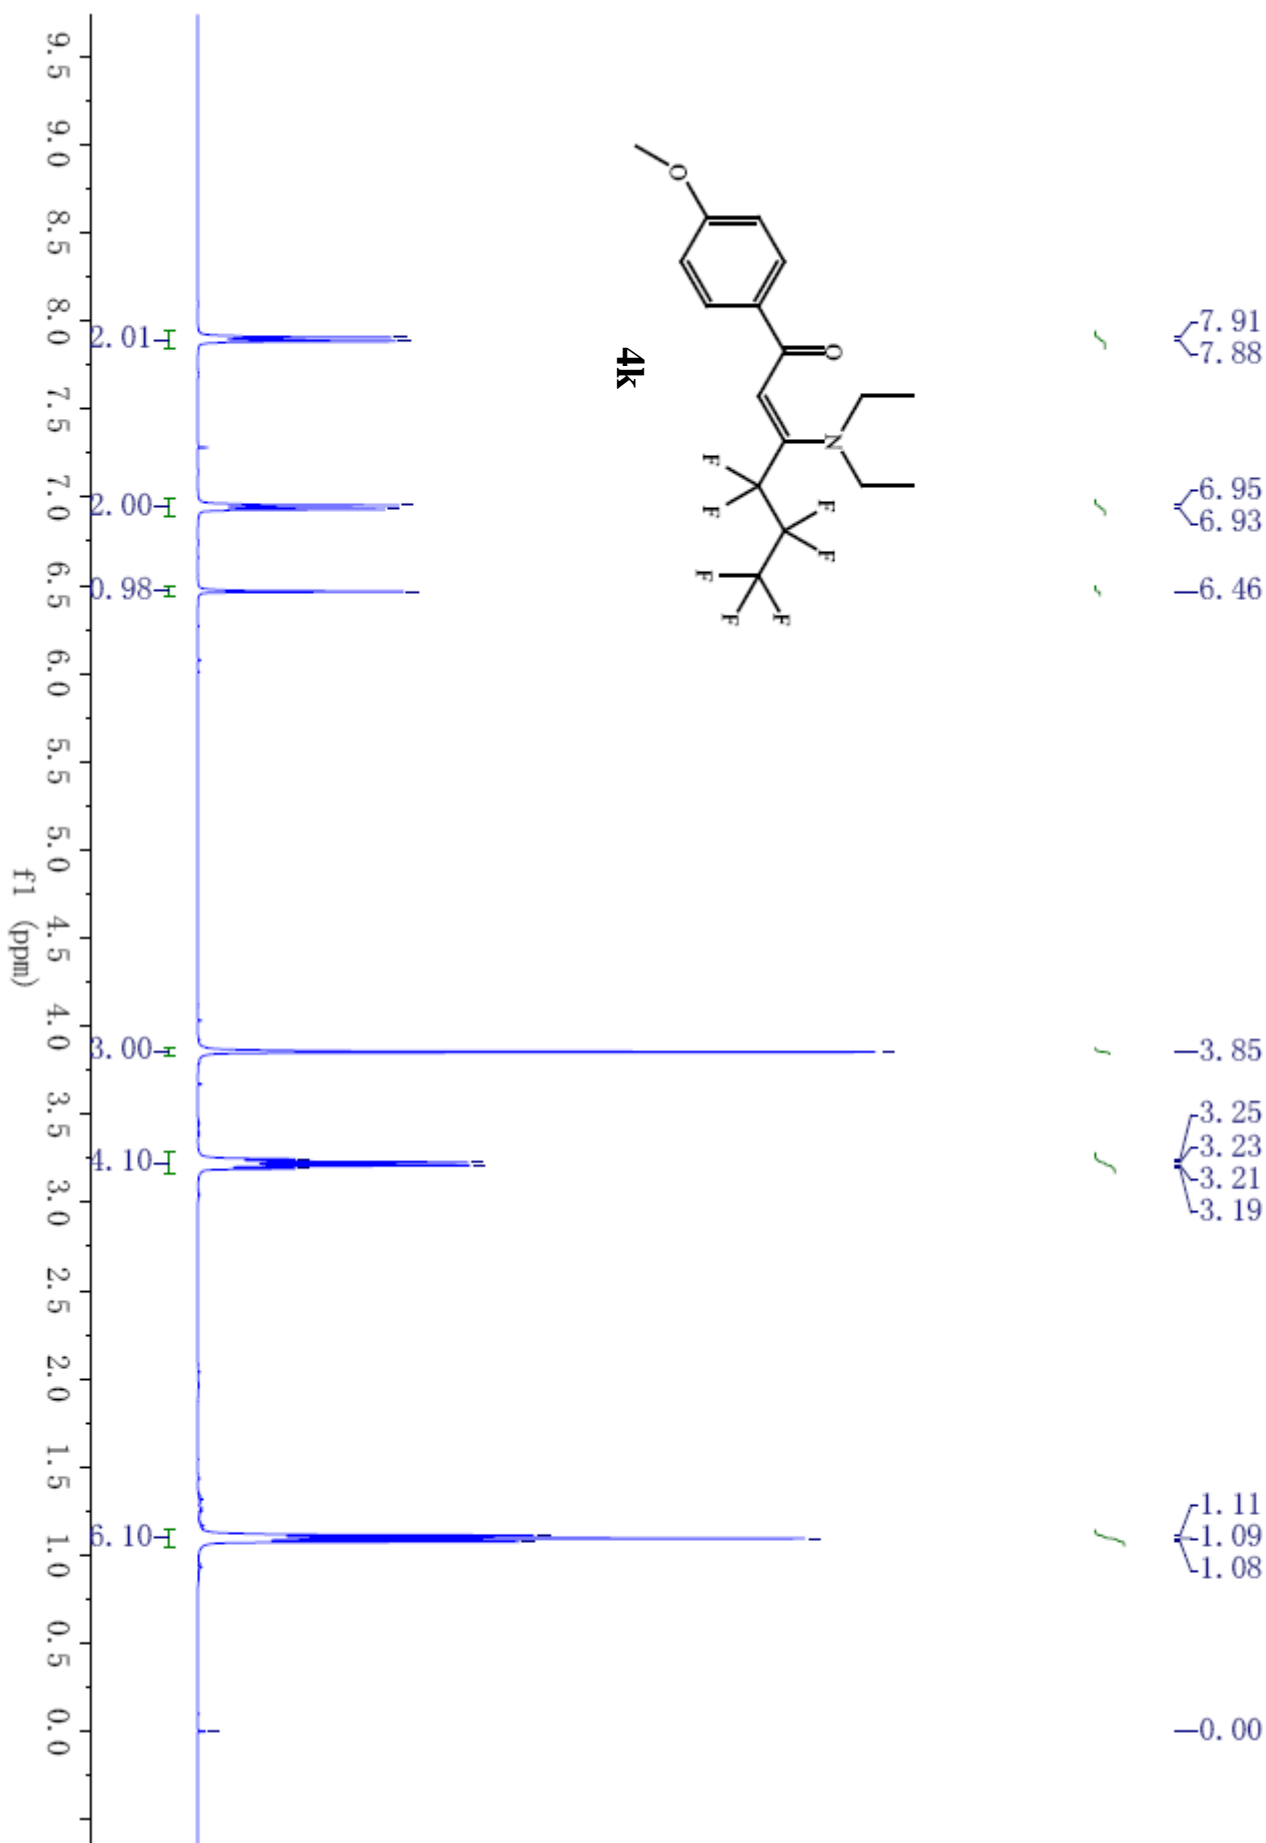



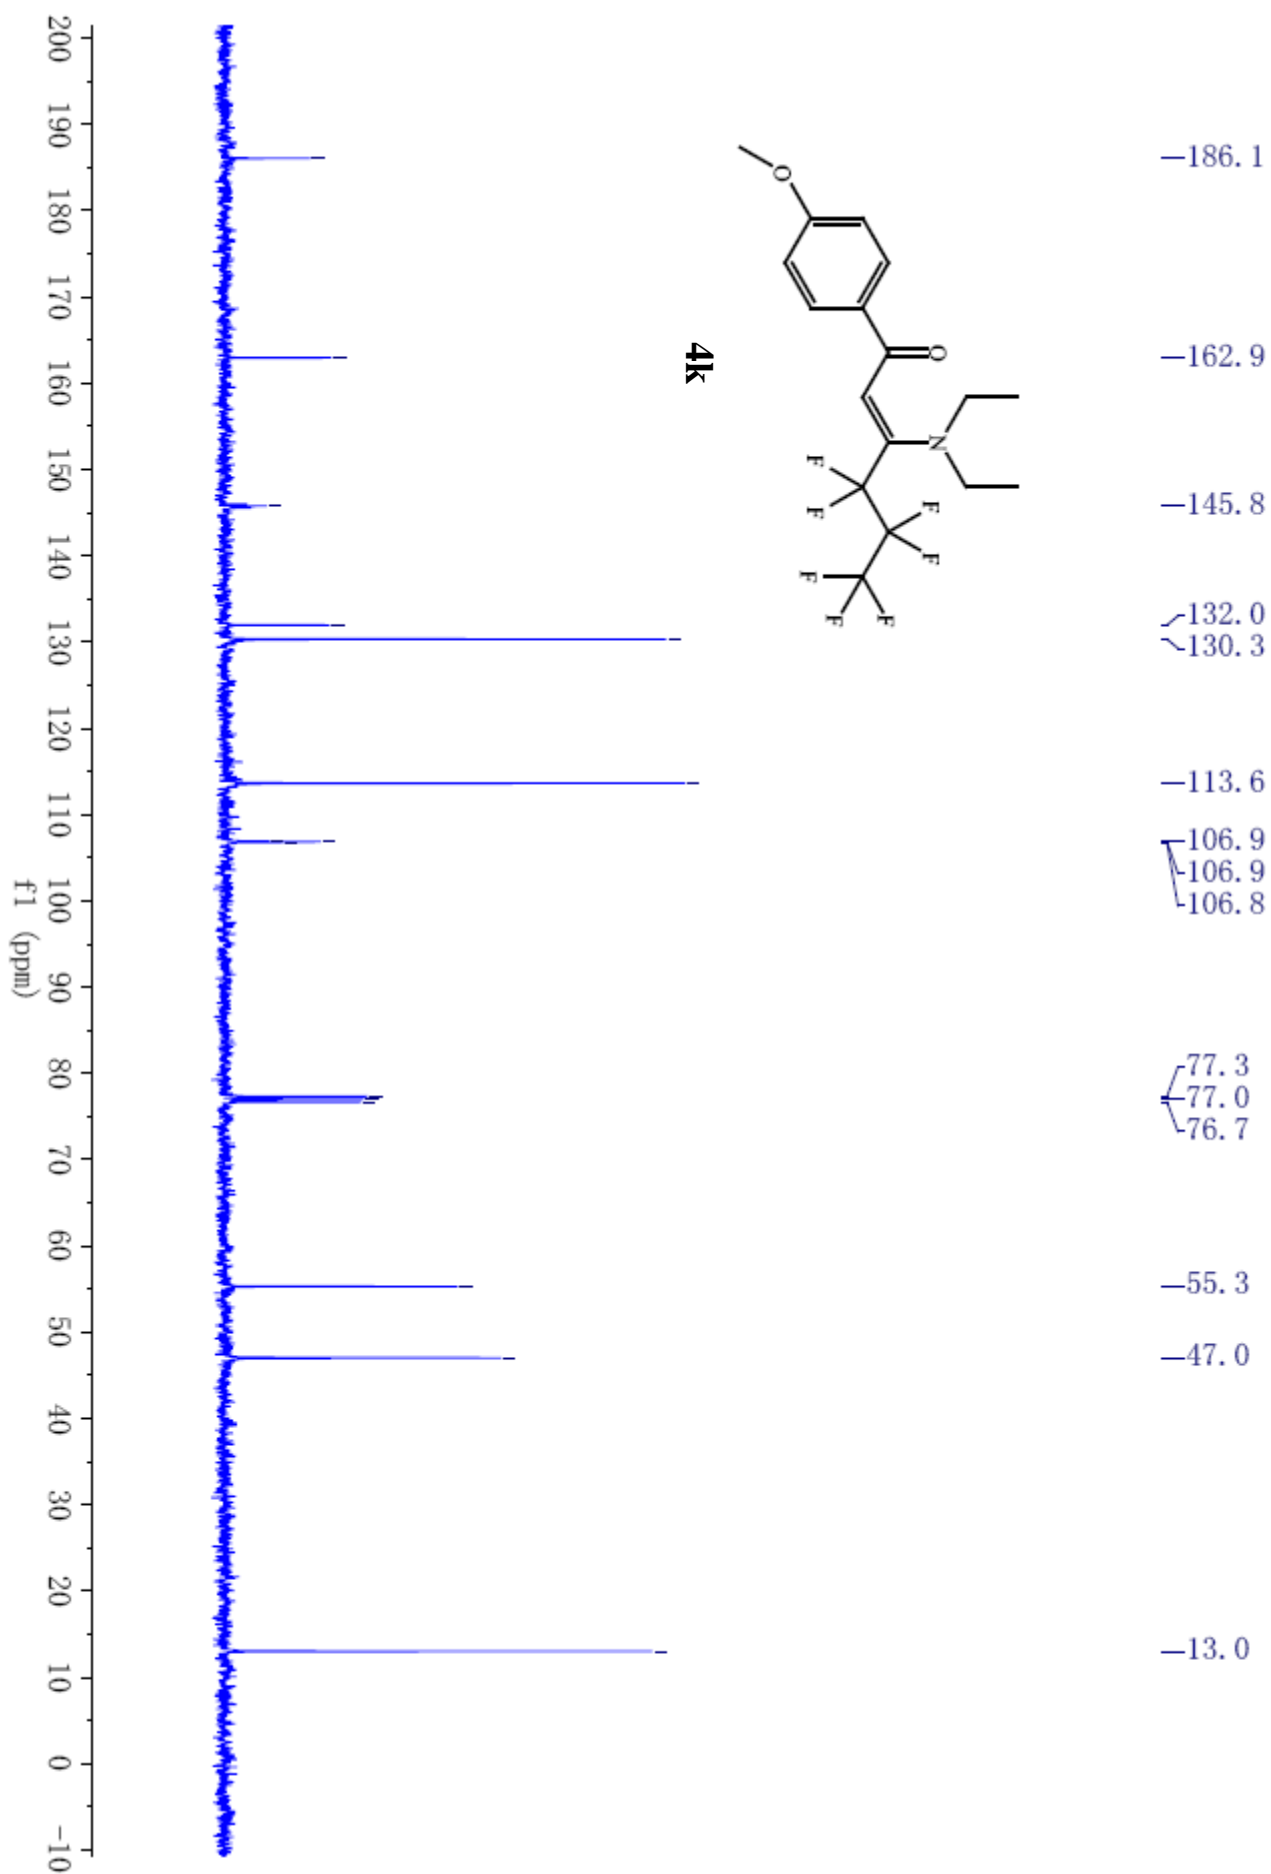

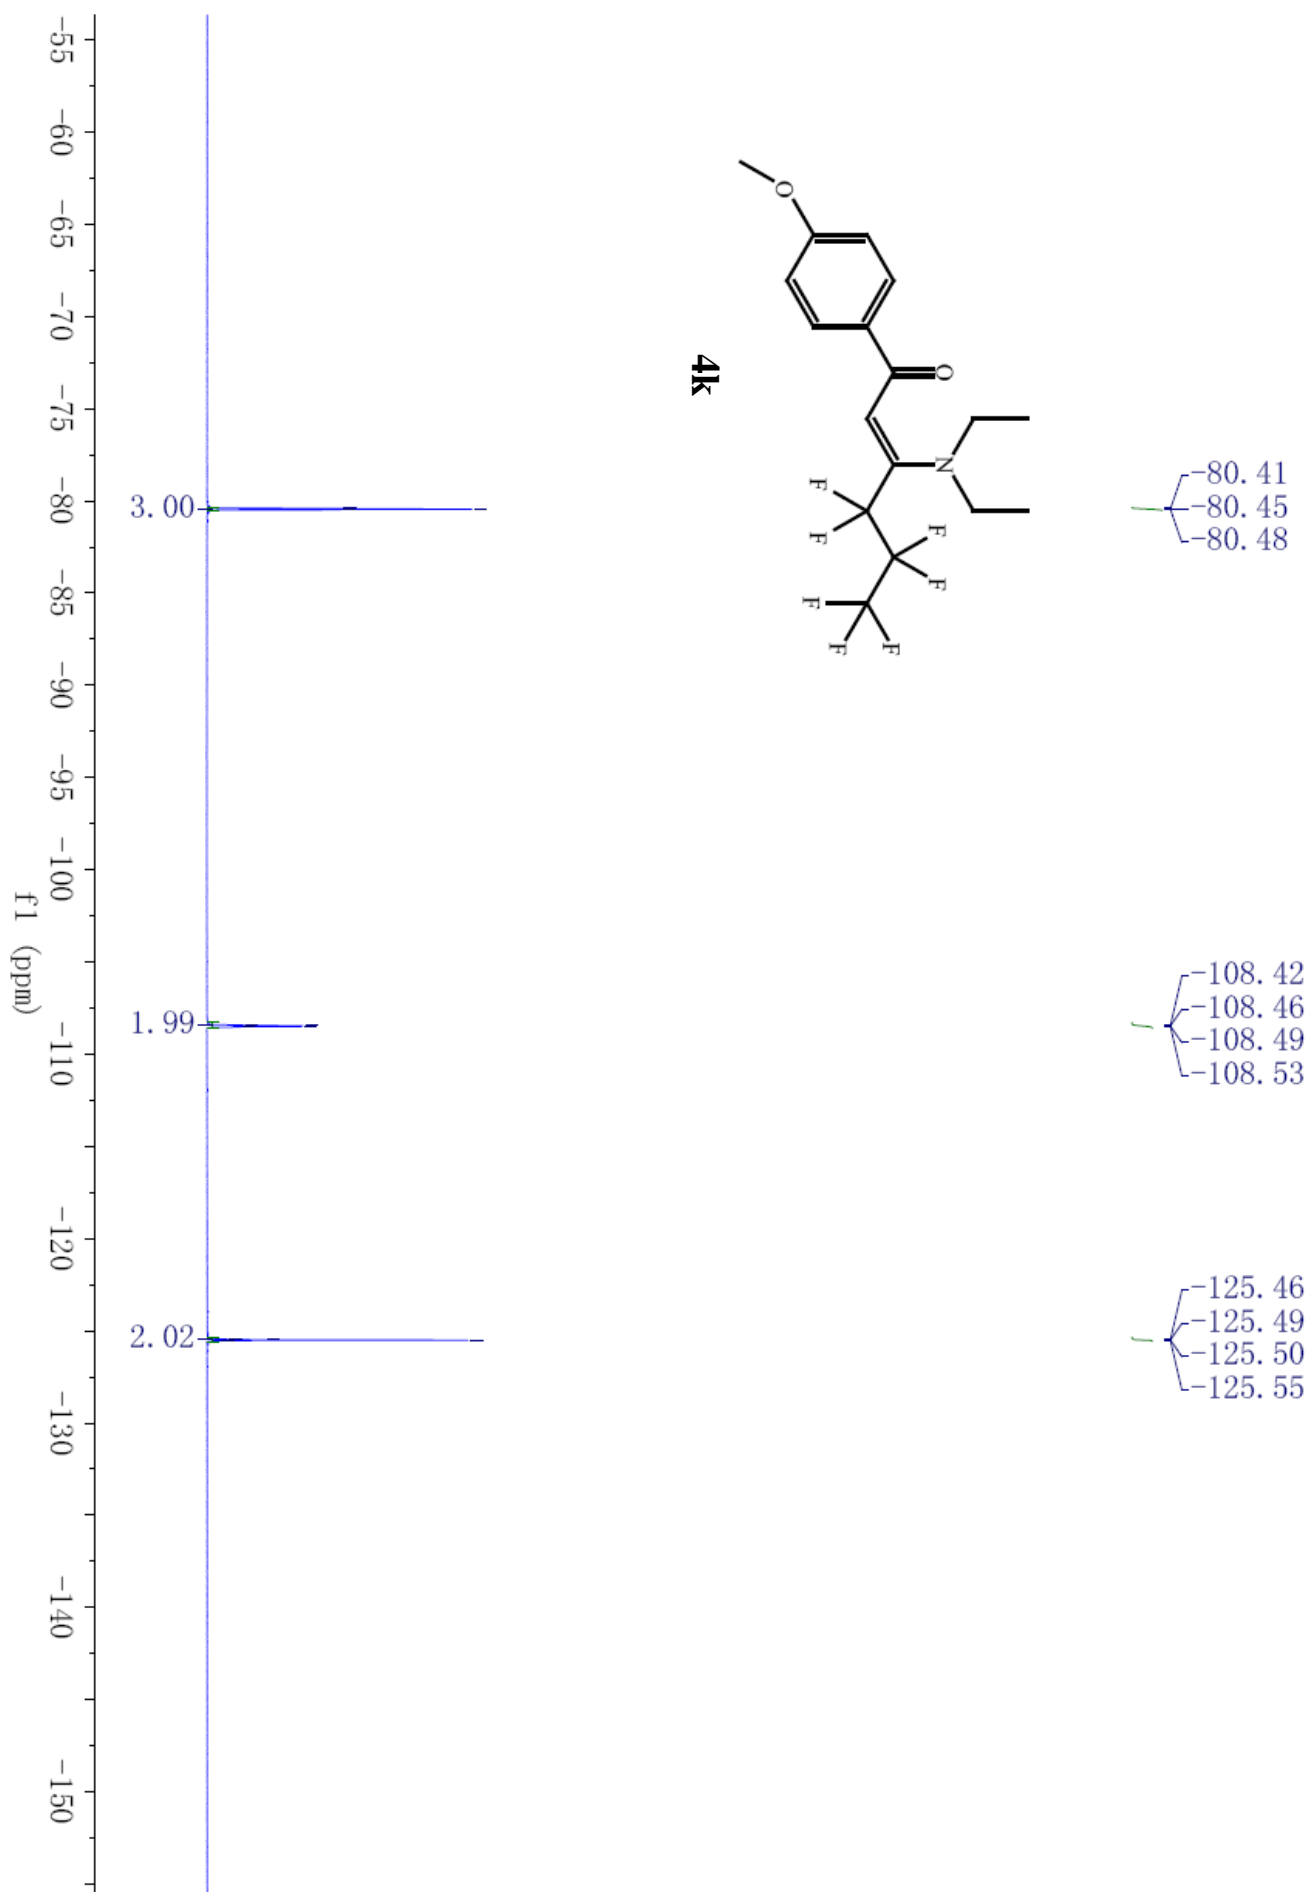

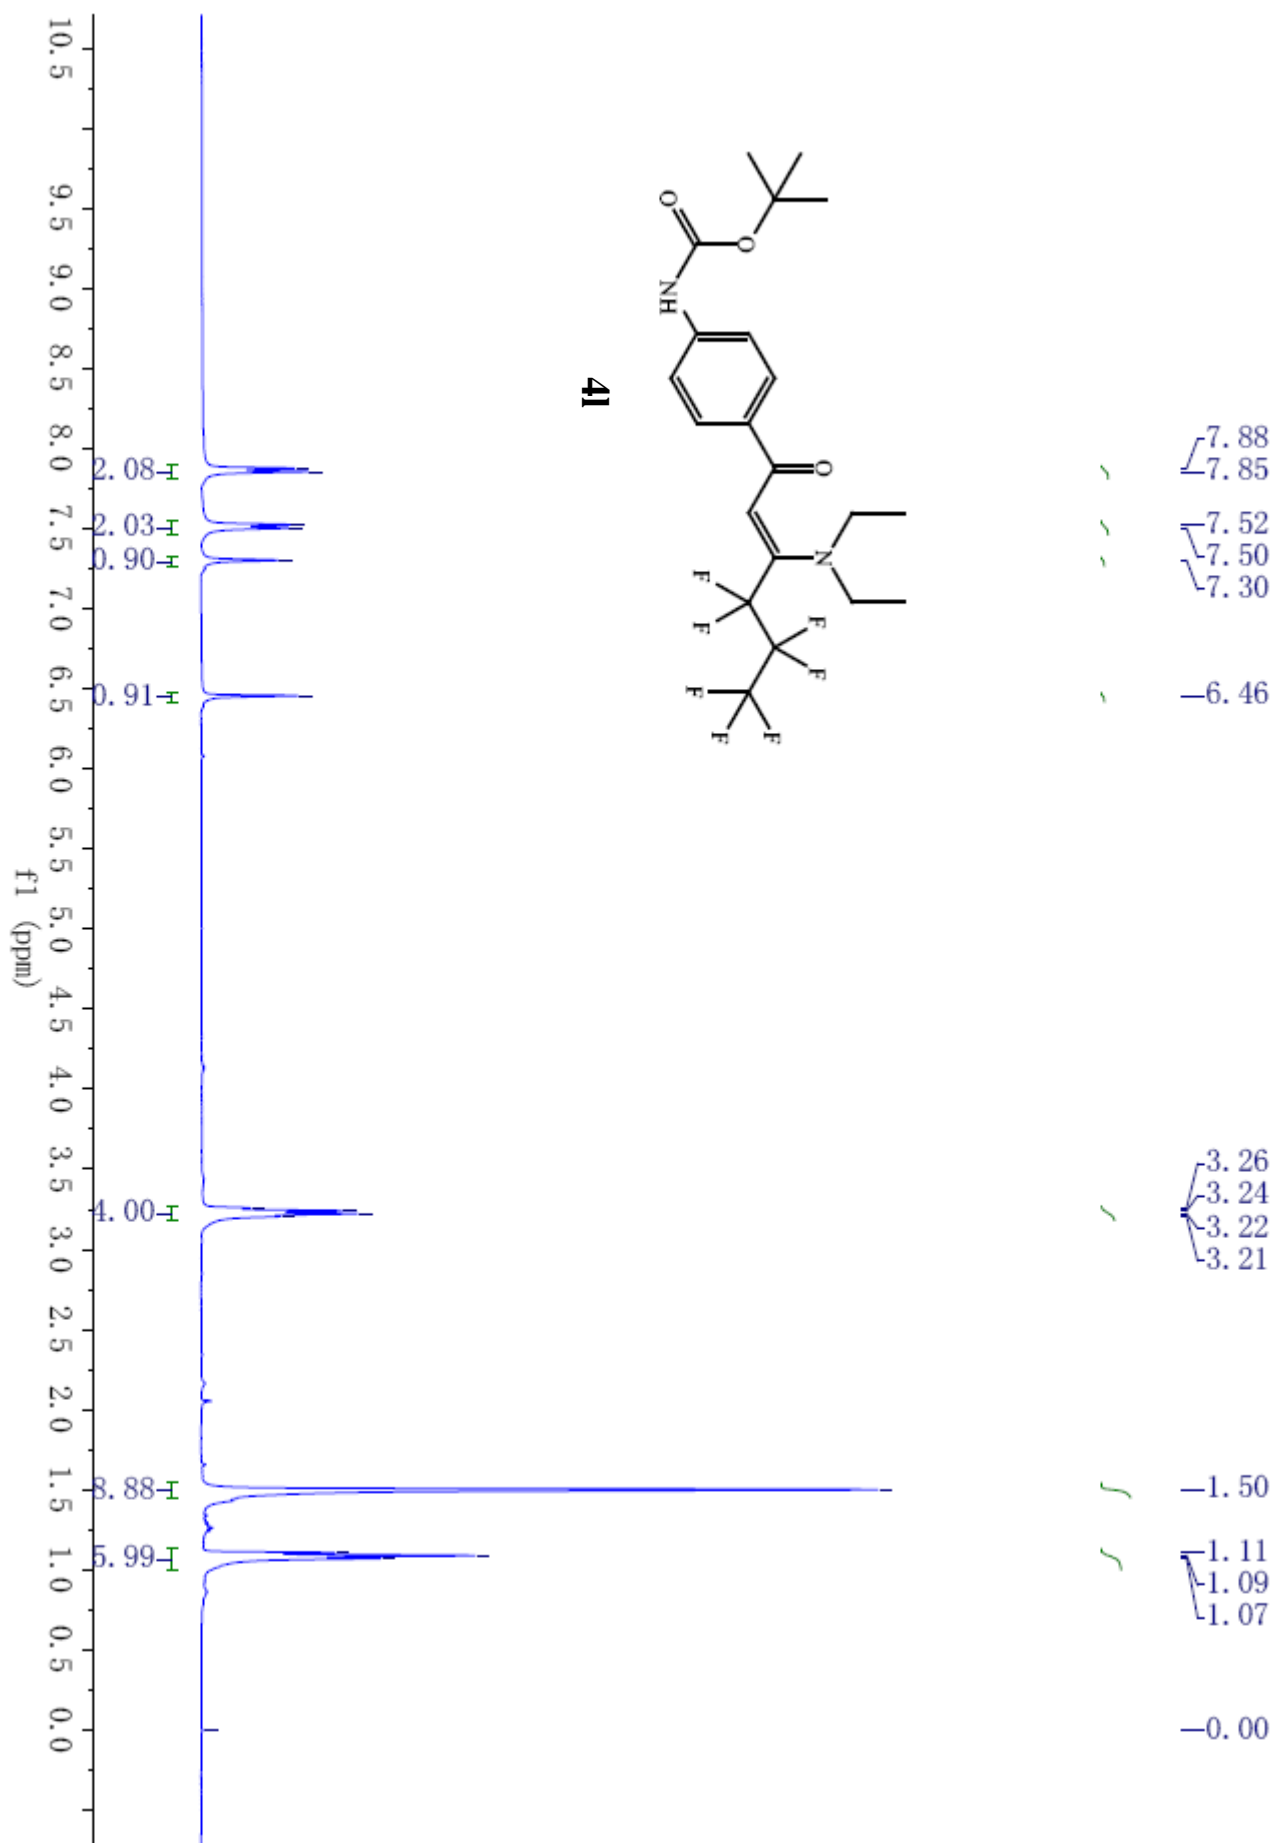

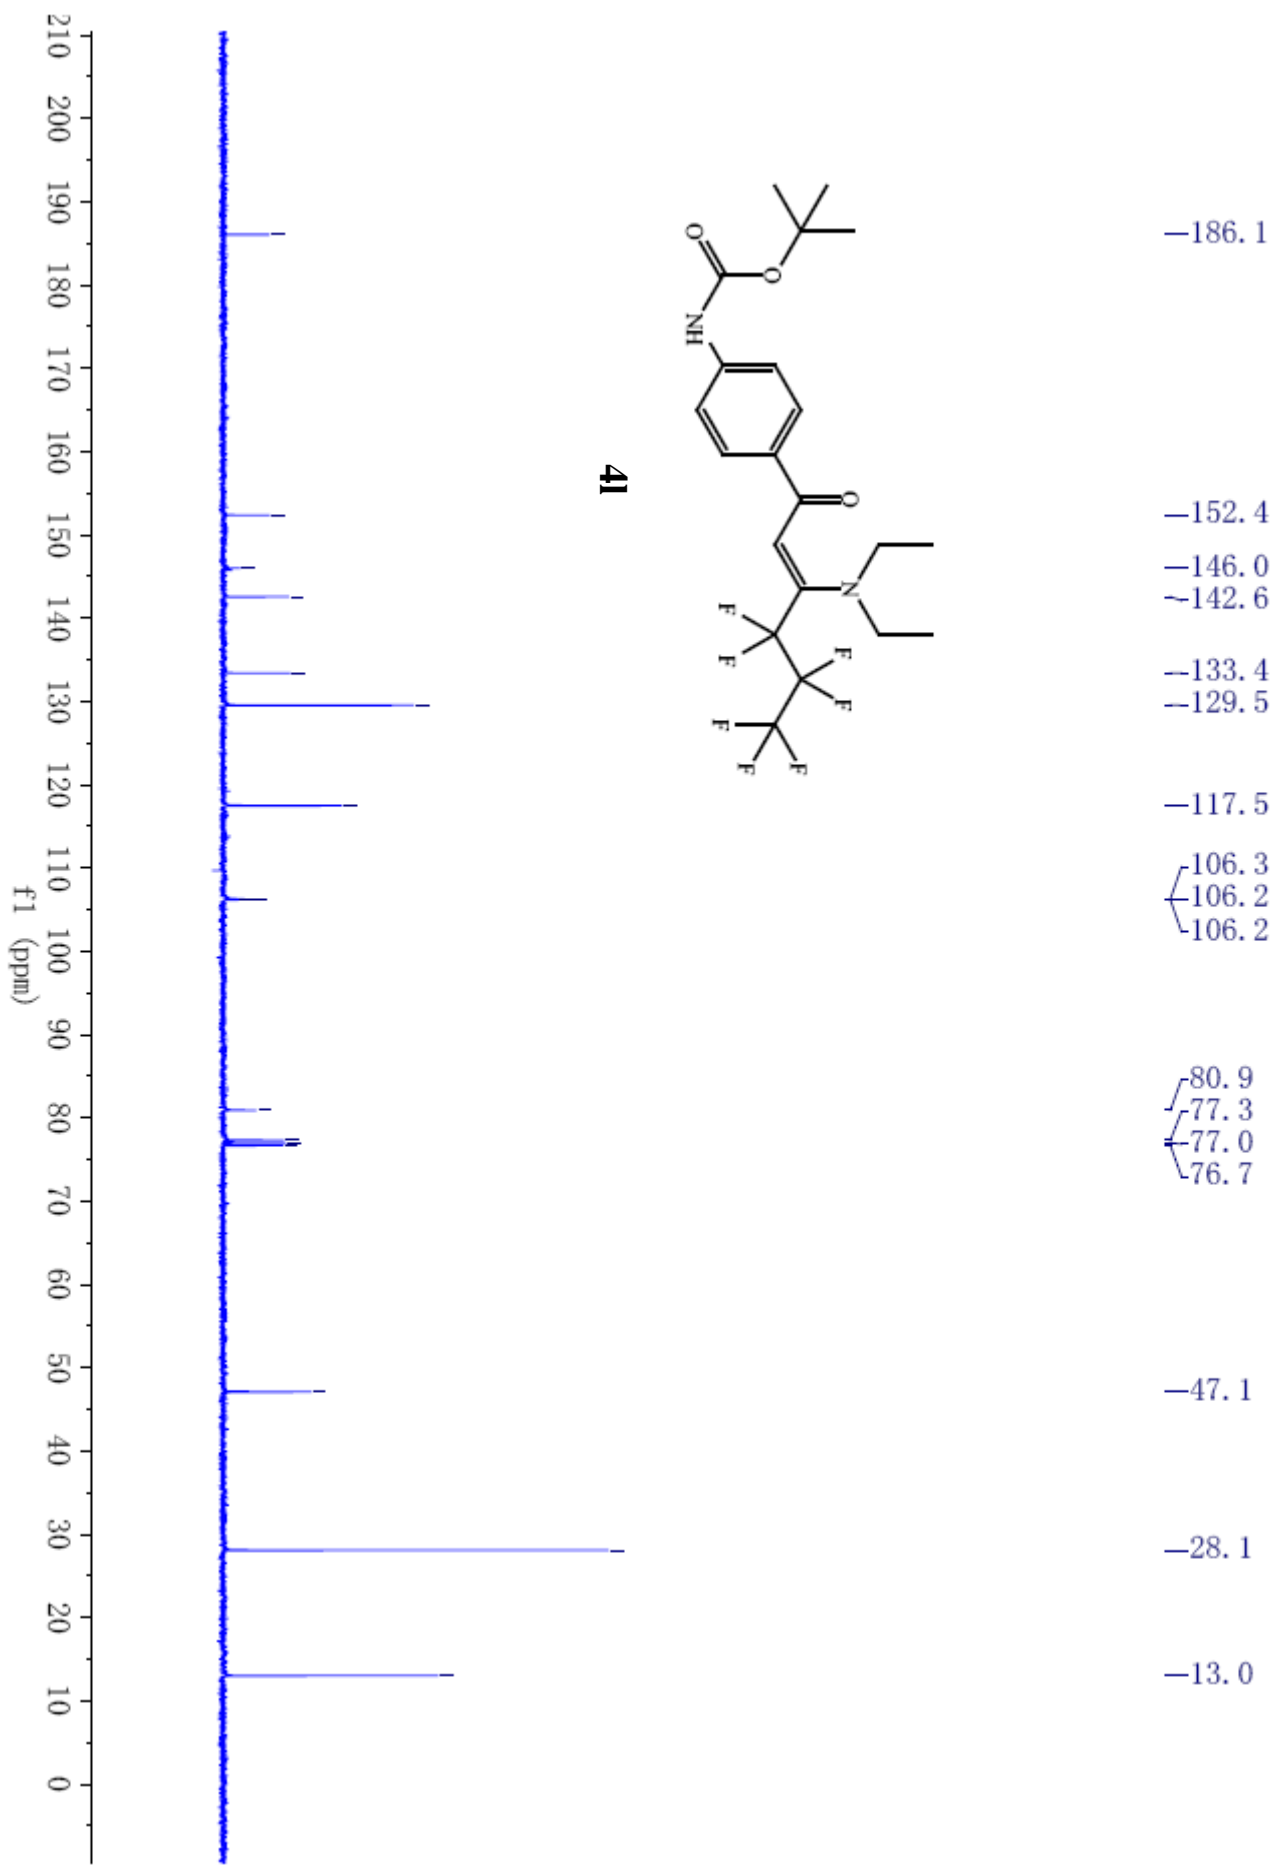

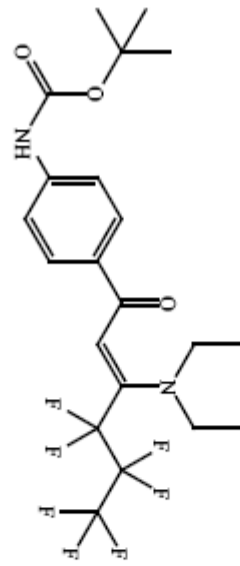

80.40  
80.44  
80.48

108.33  
108.37  
108.40  
108.44

125.43  
125.46  
125.47  
125.52

41

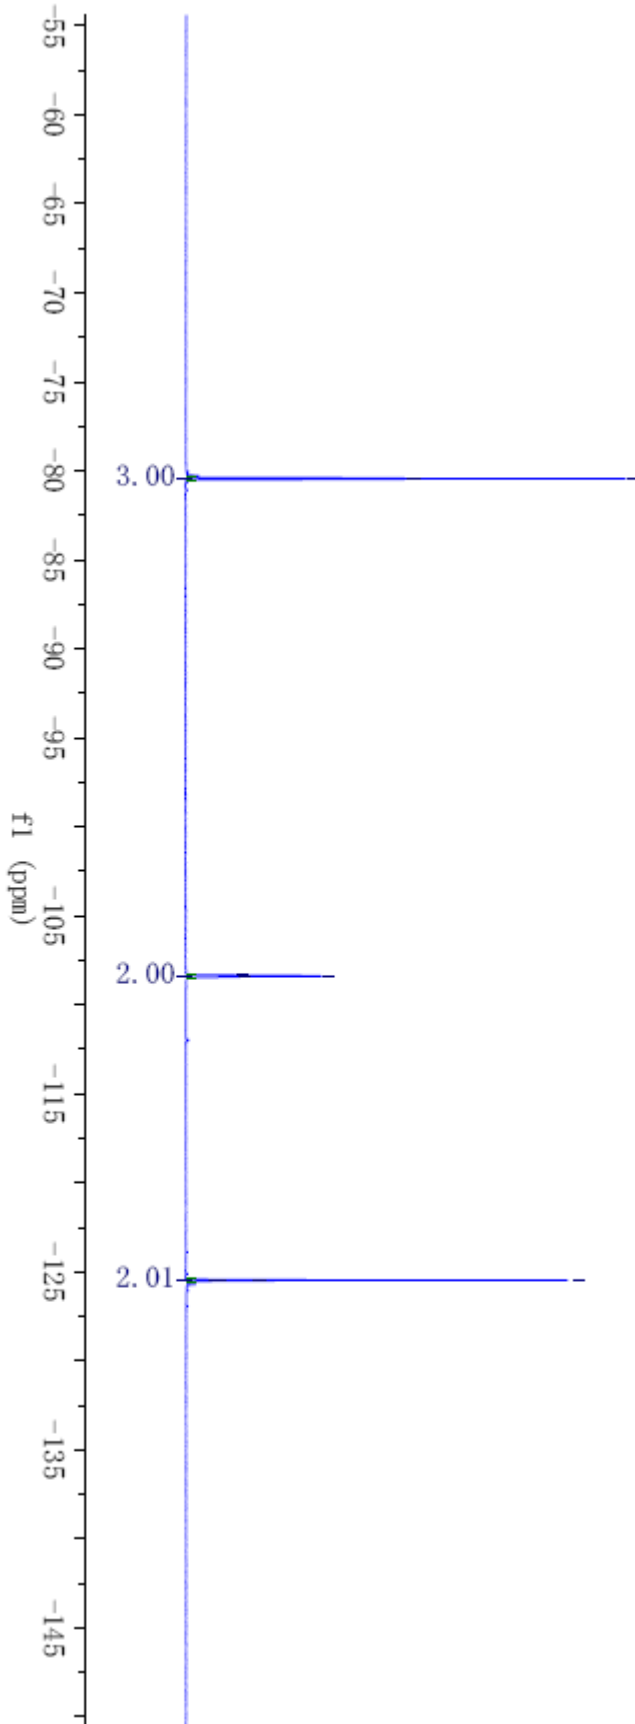

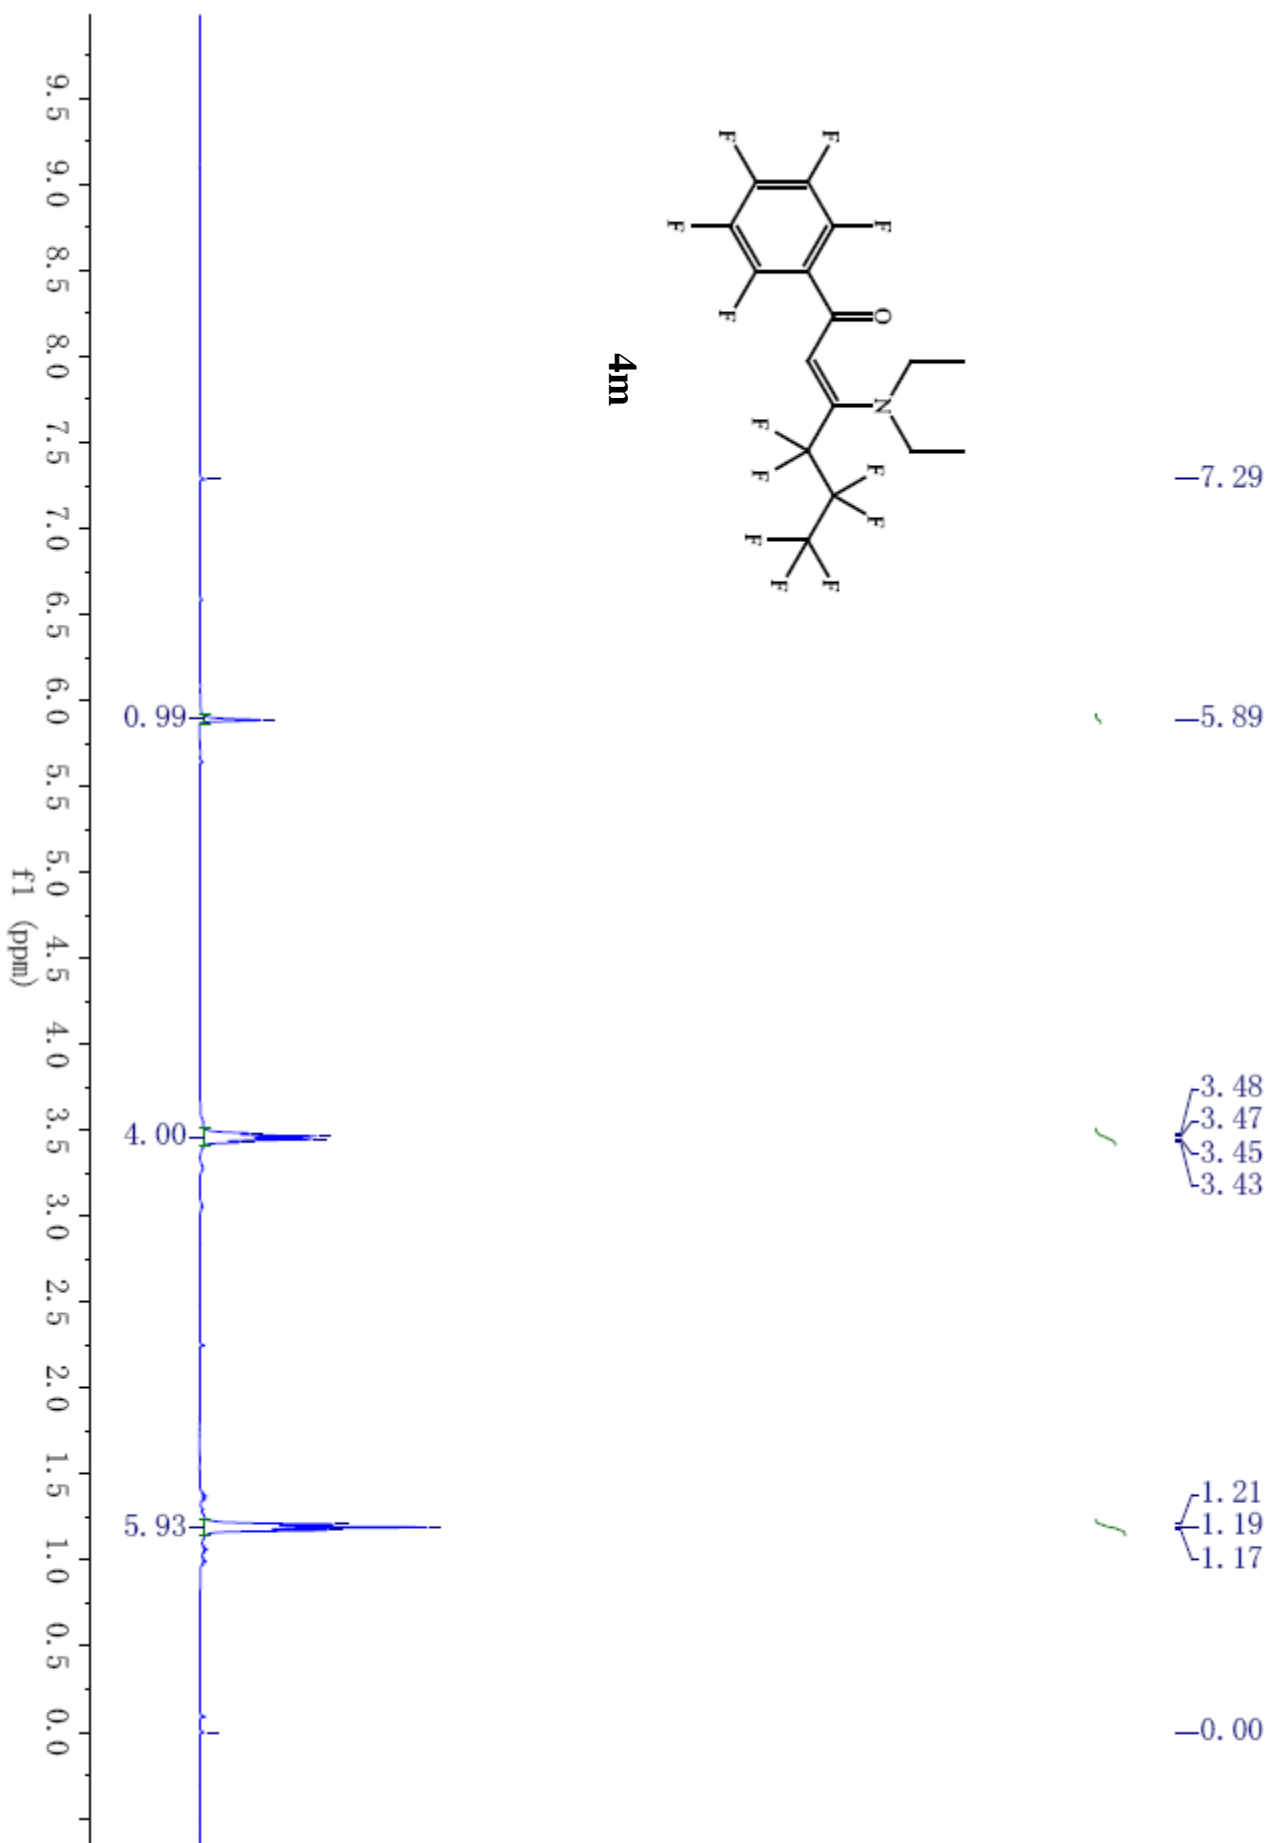

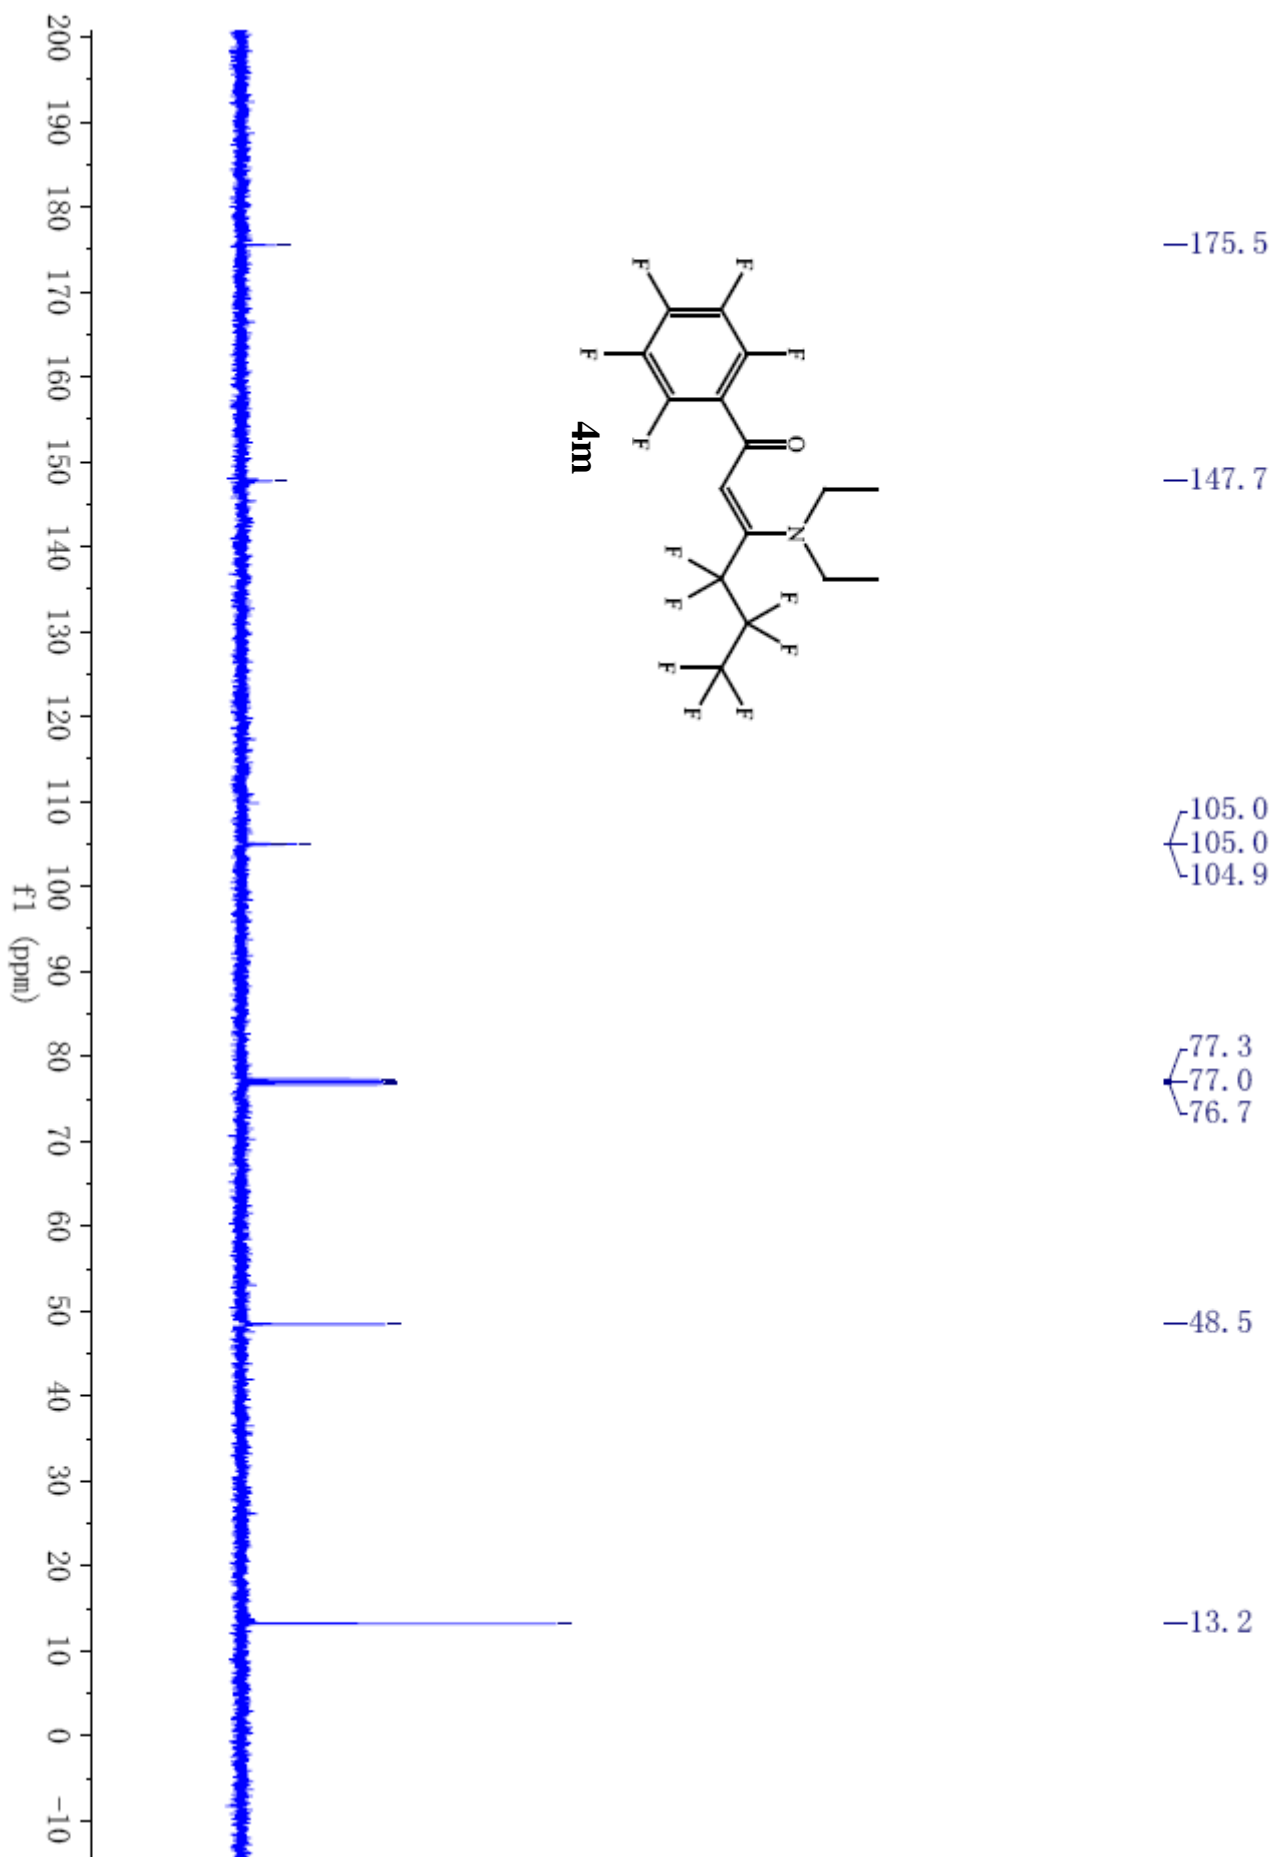

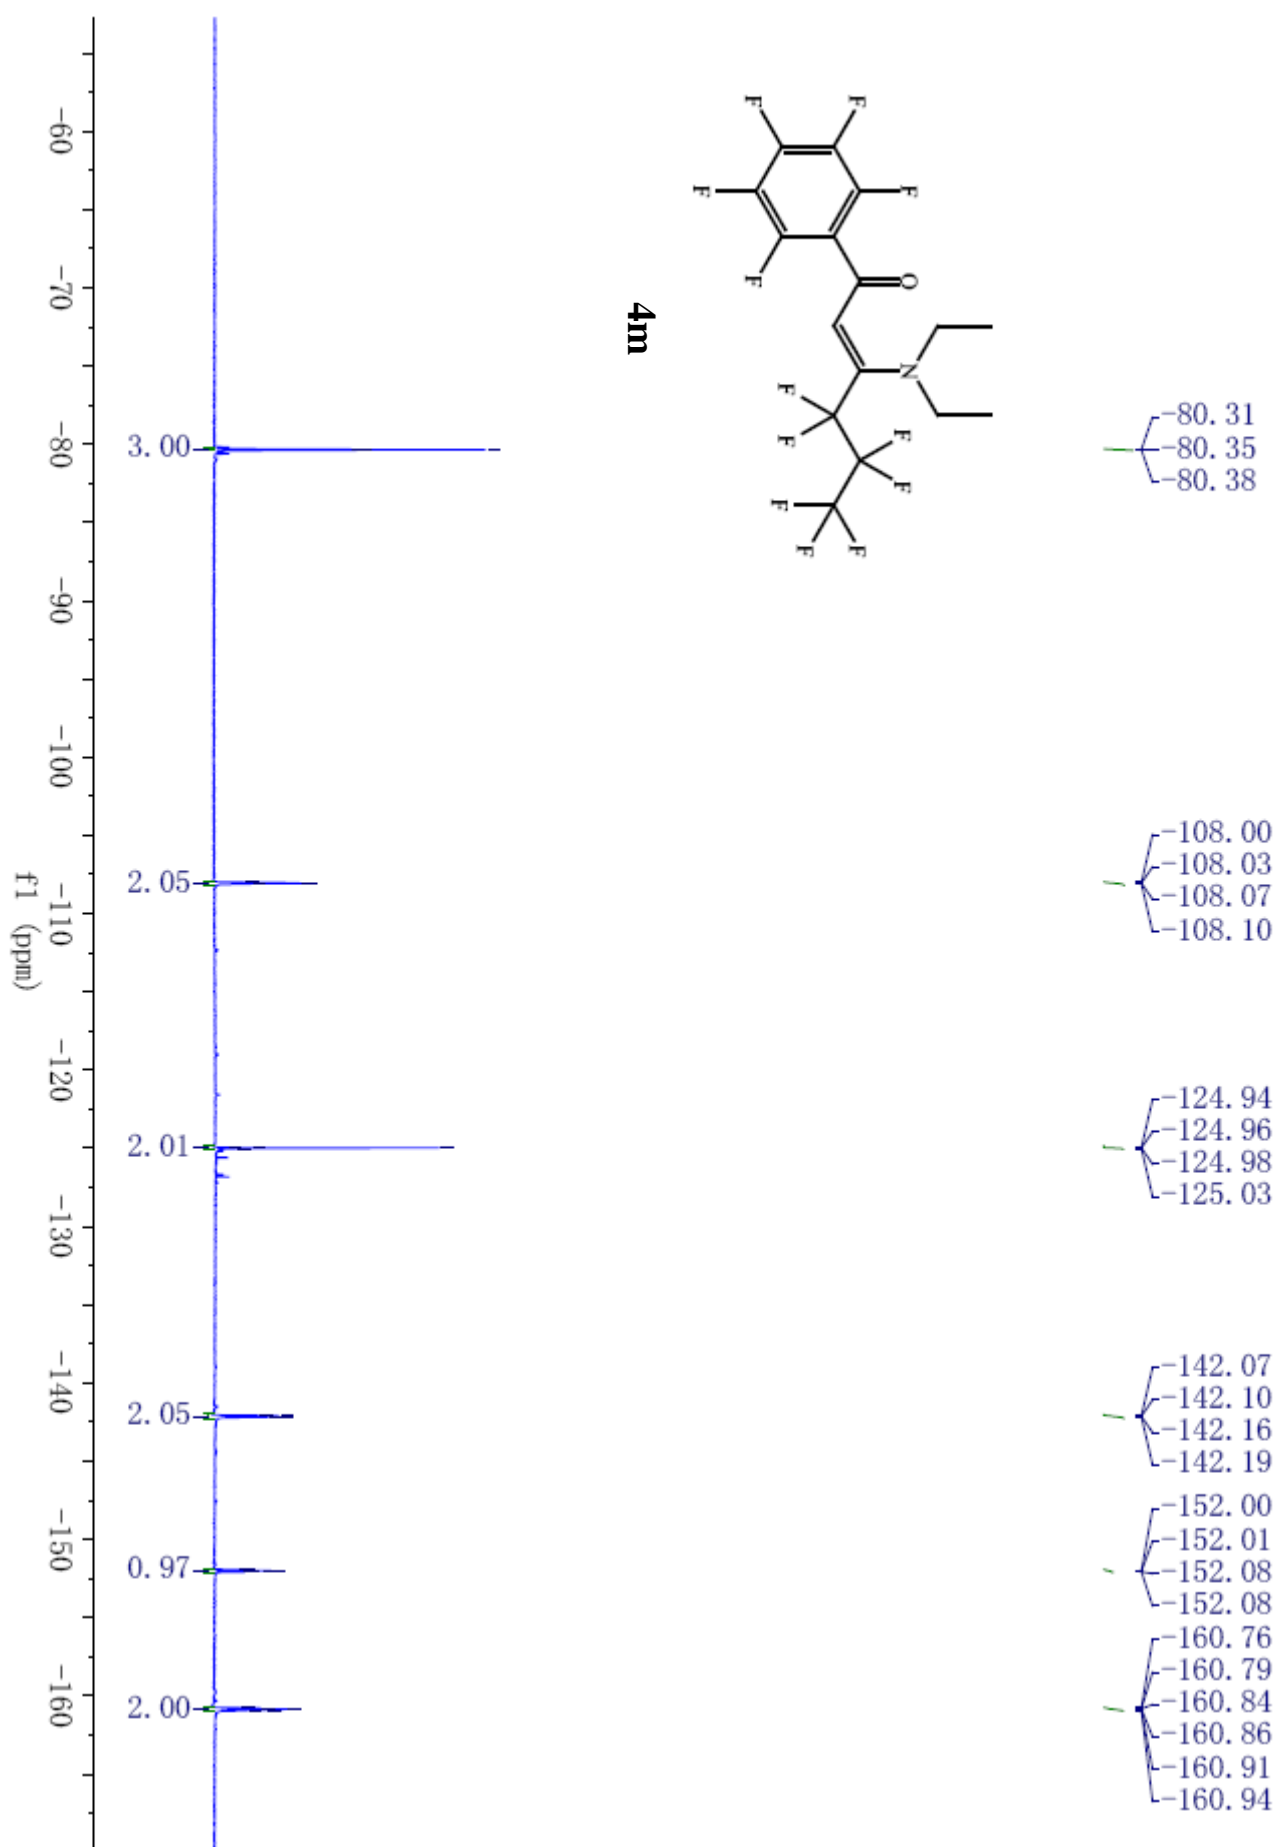



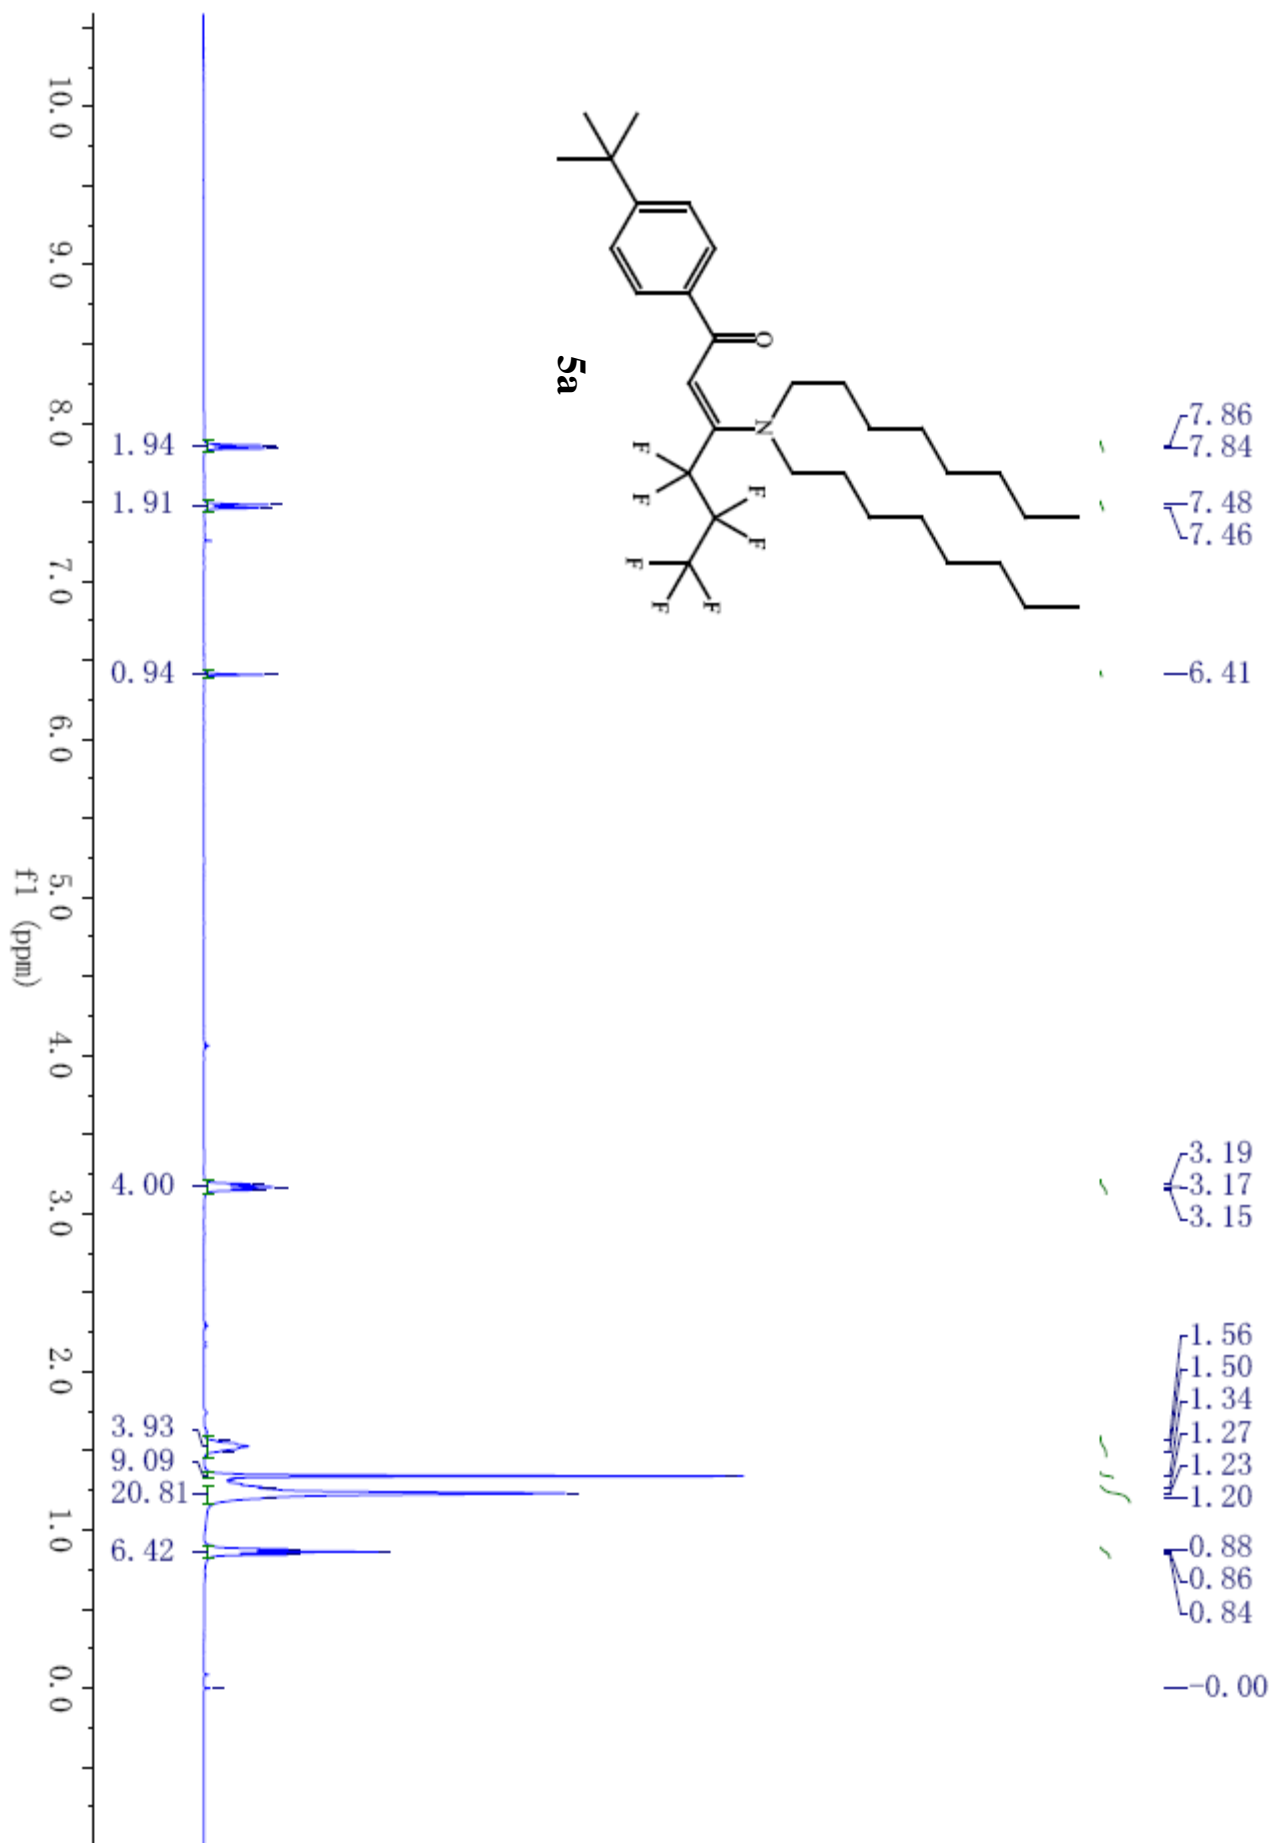

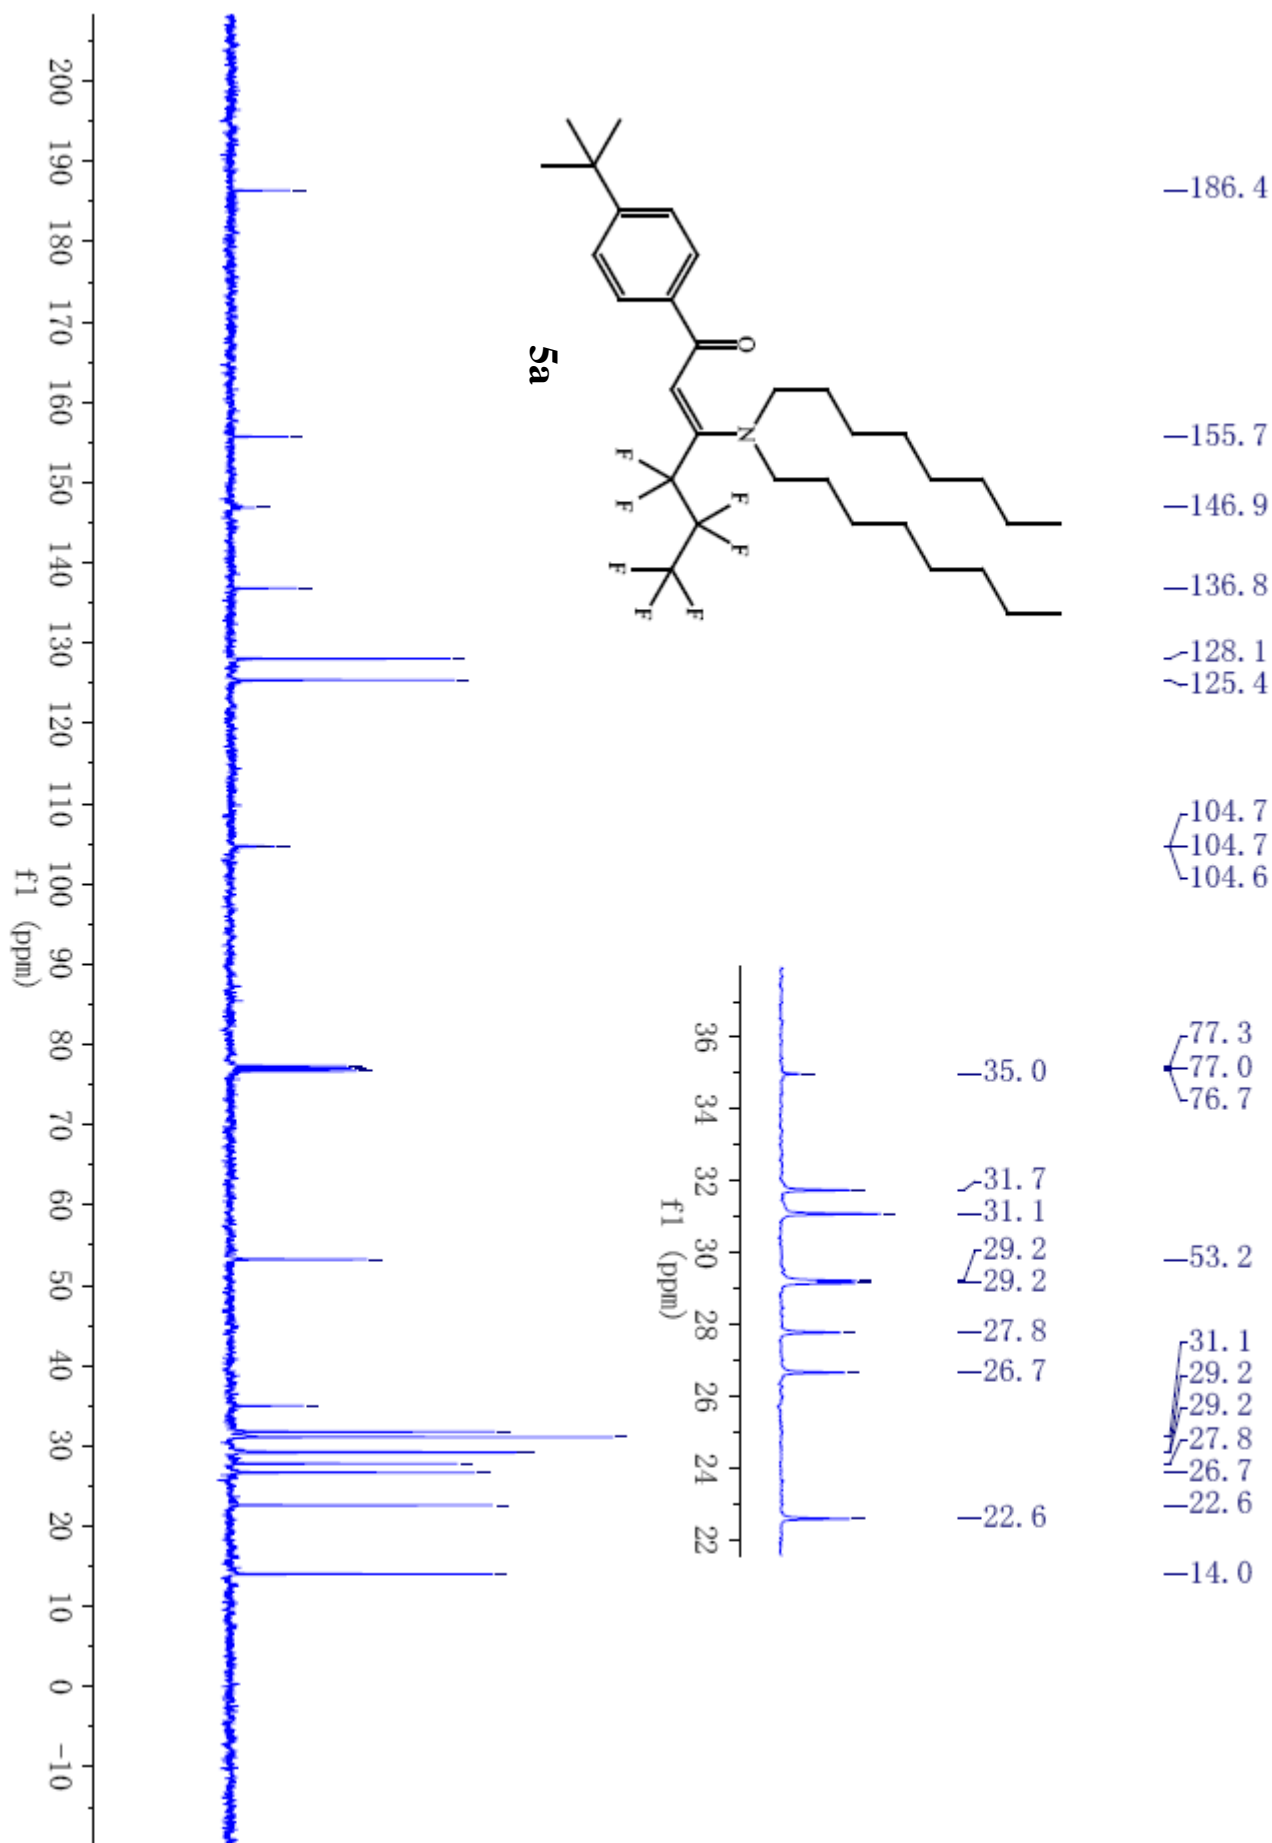

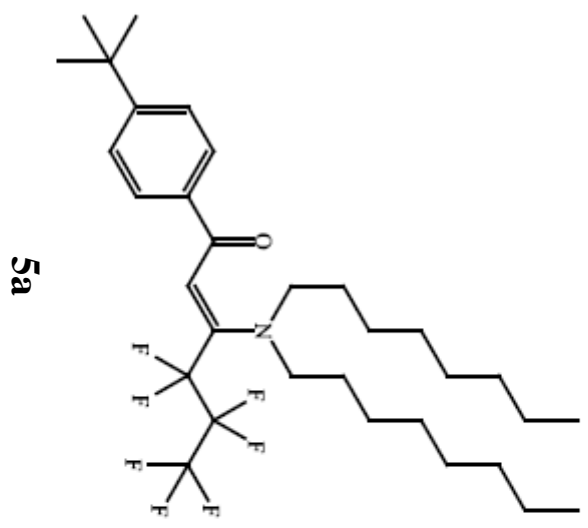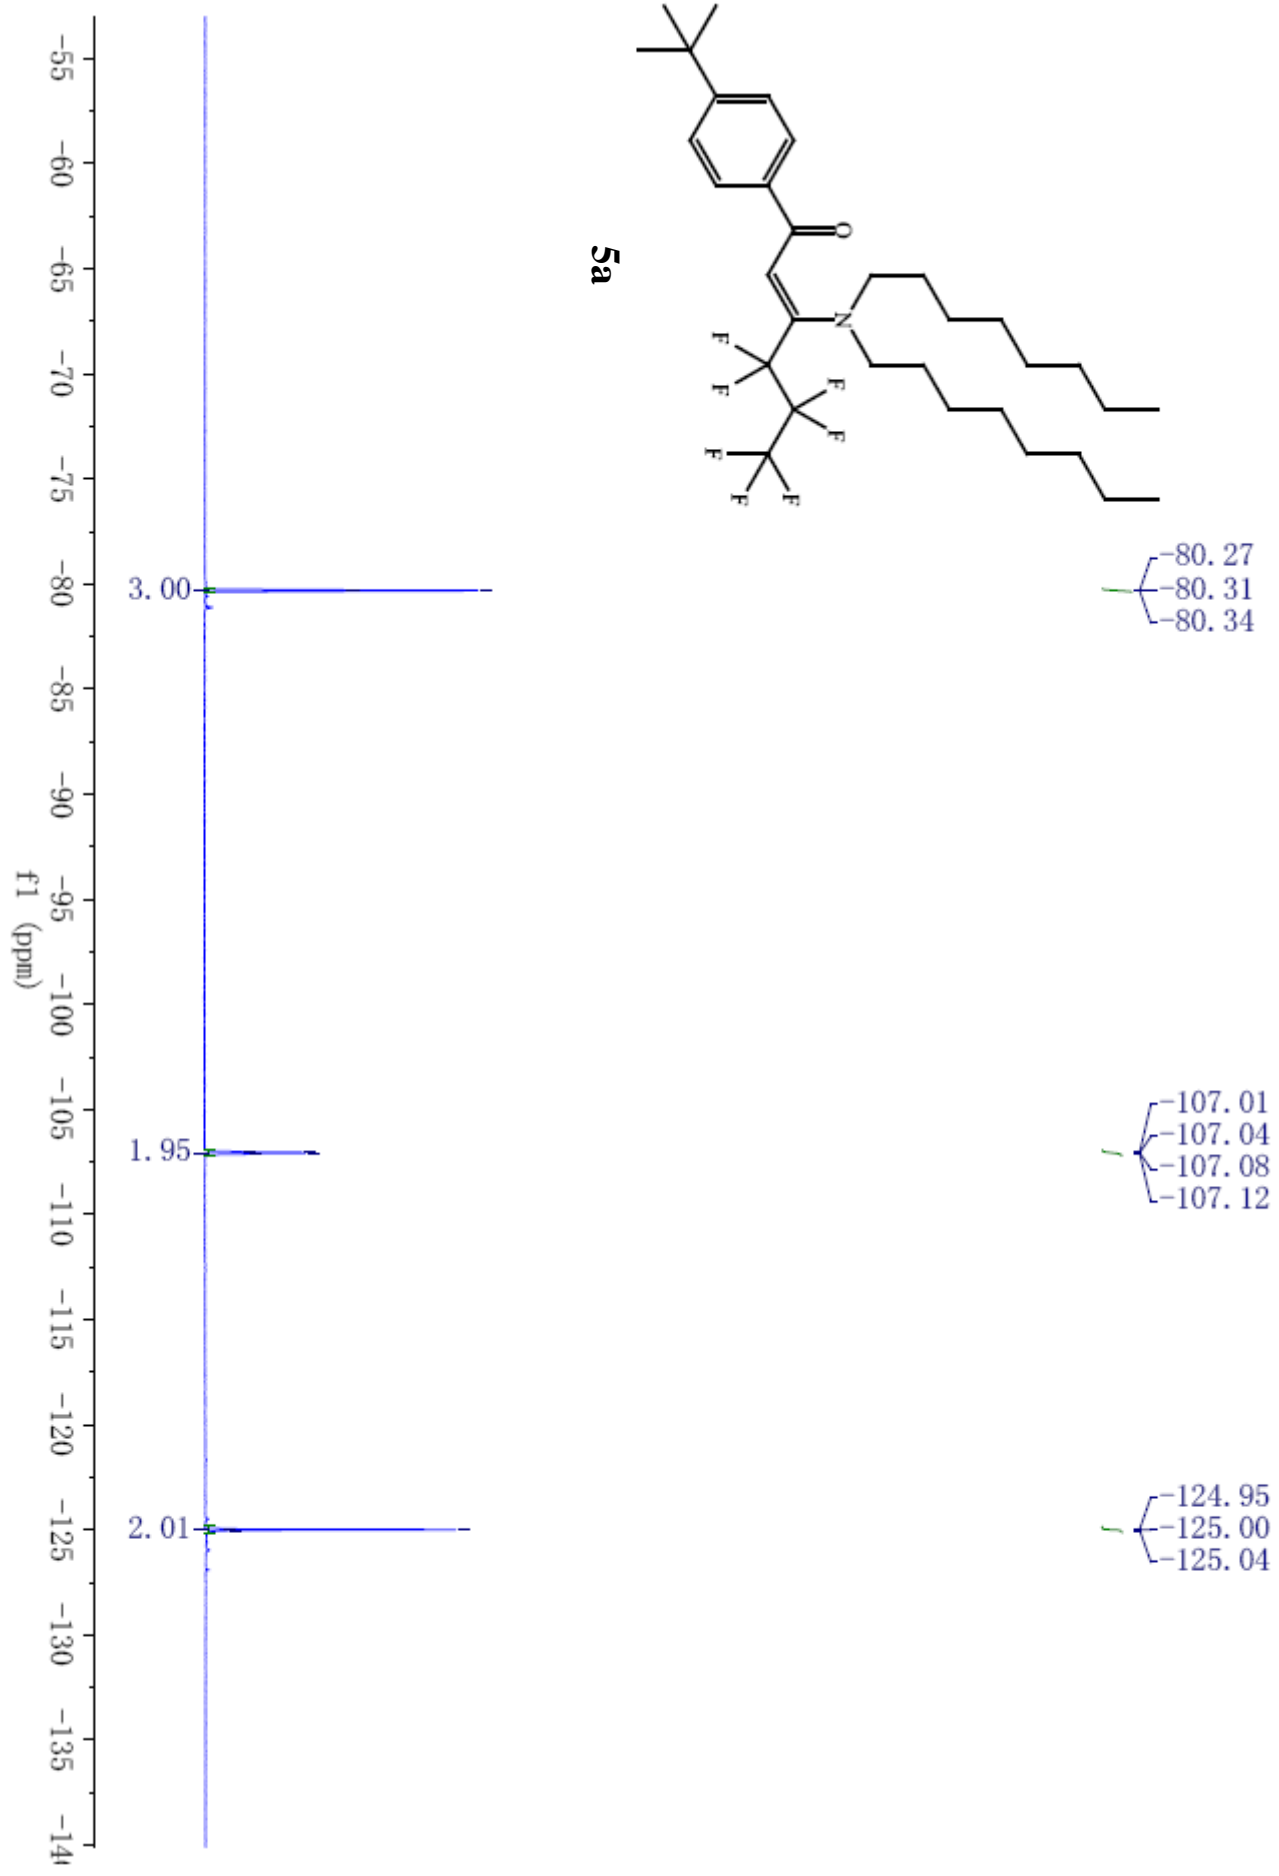

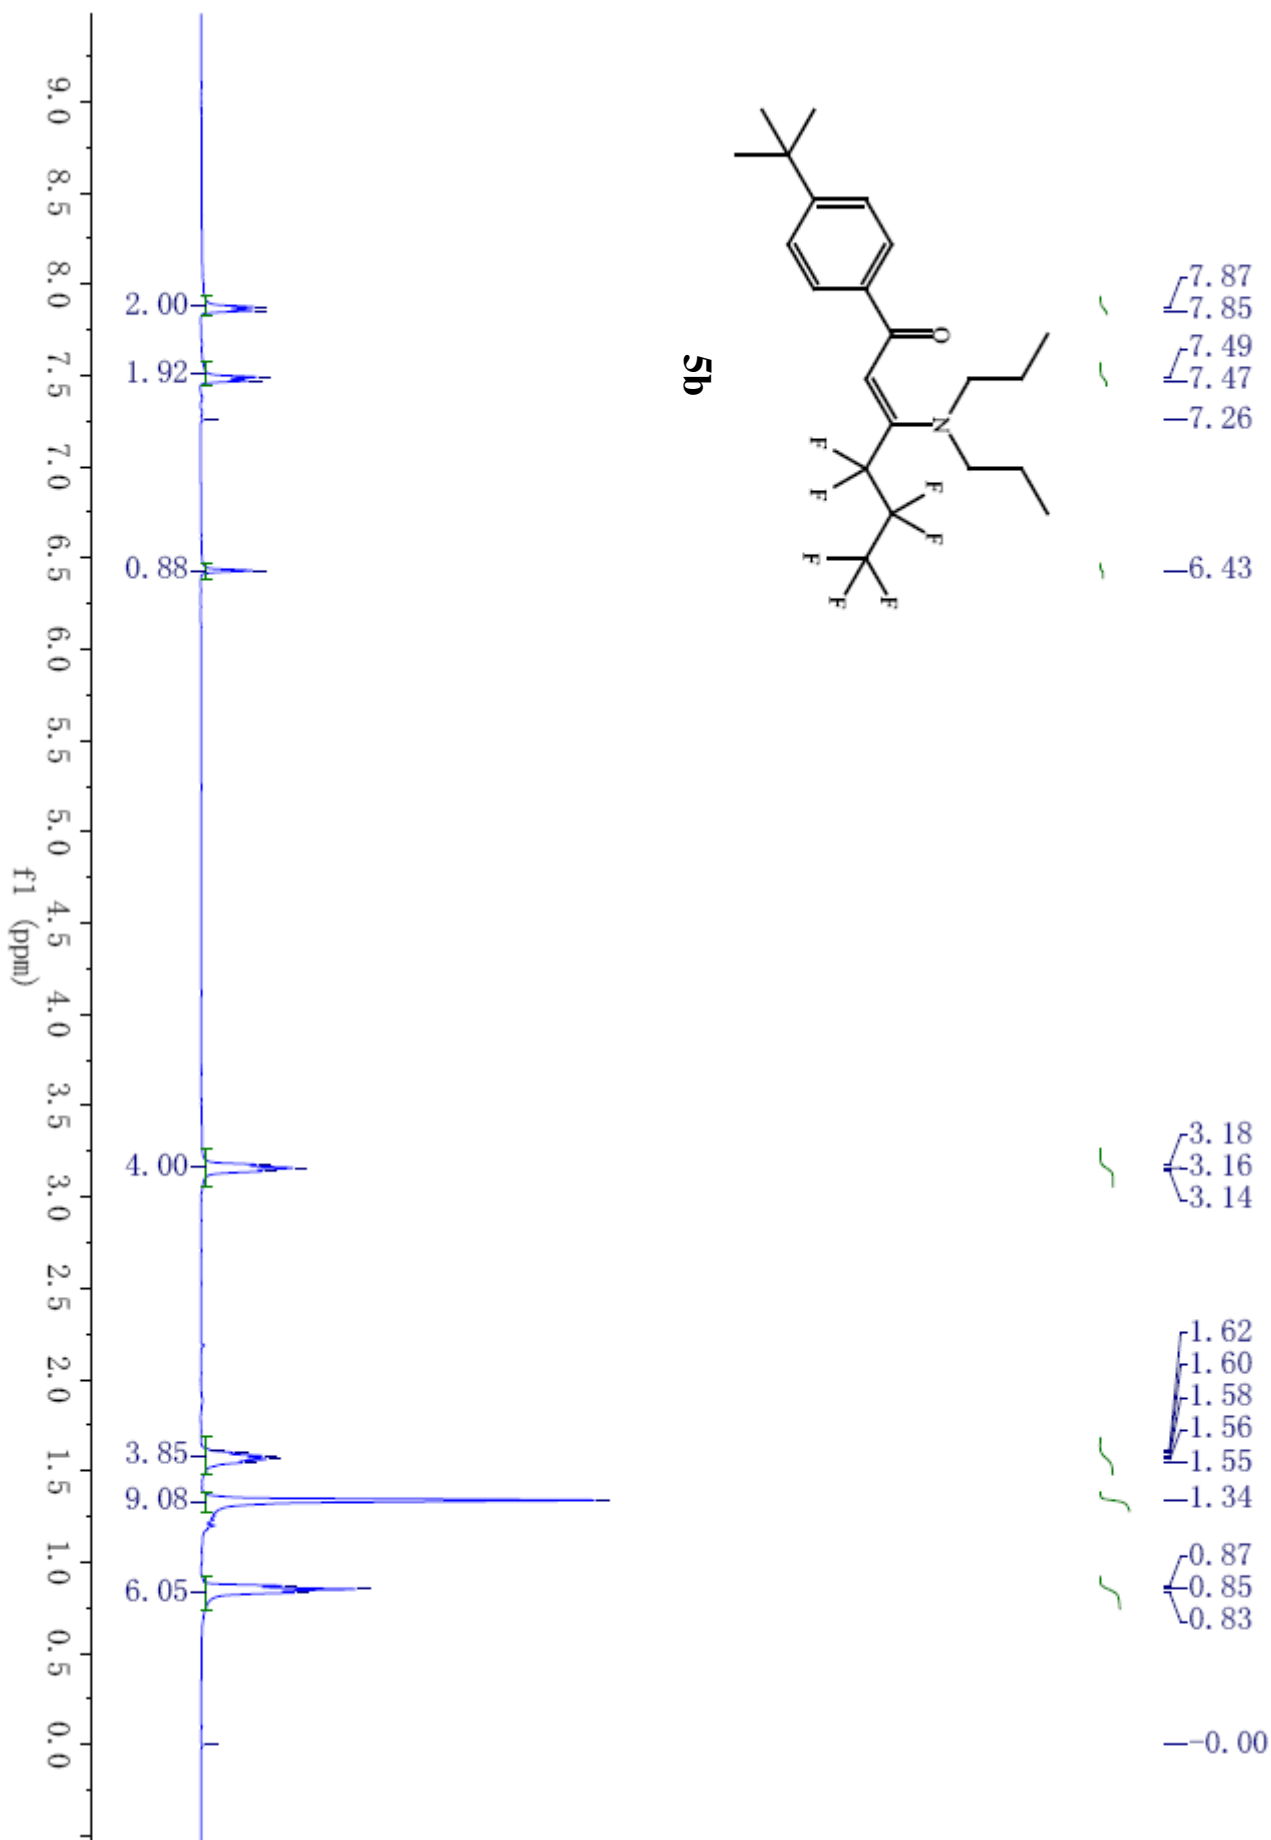

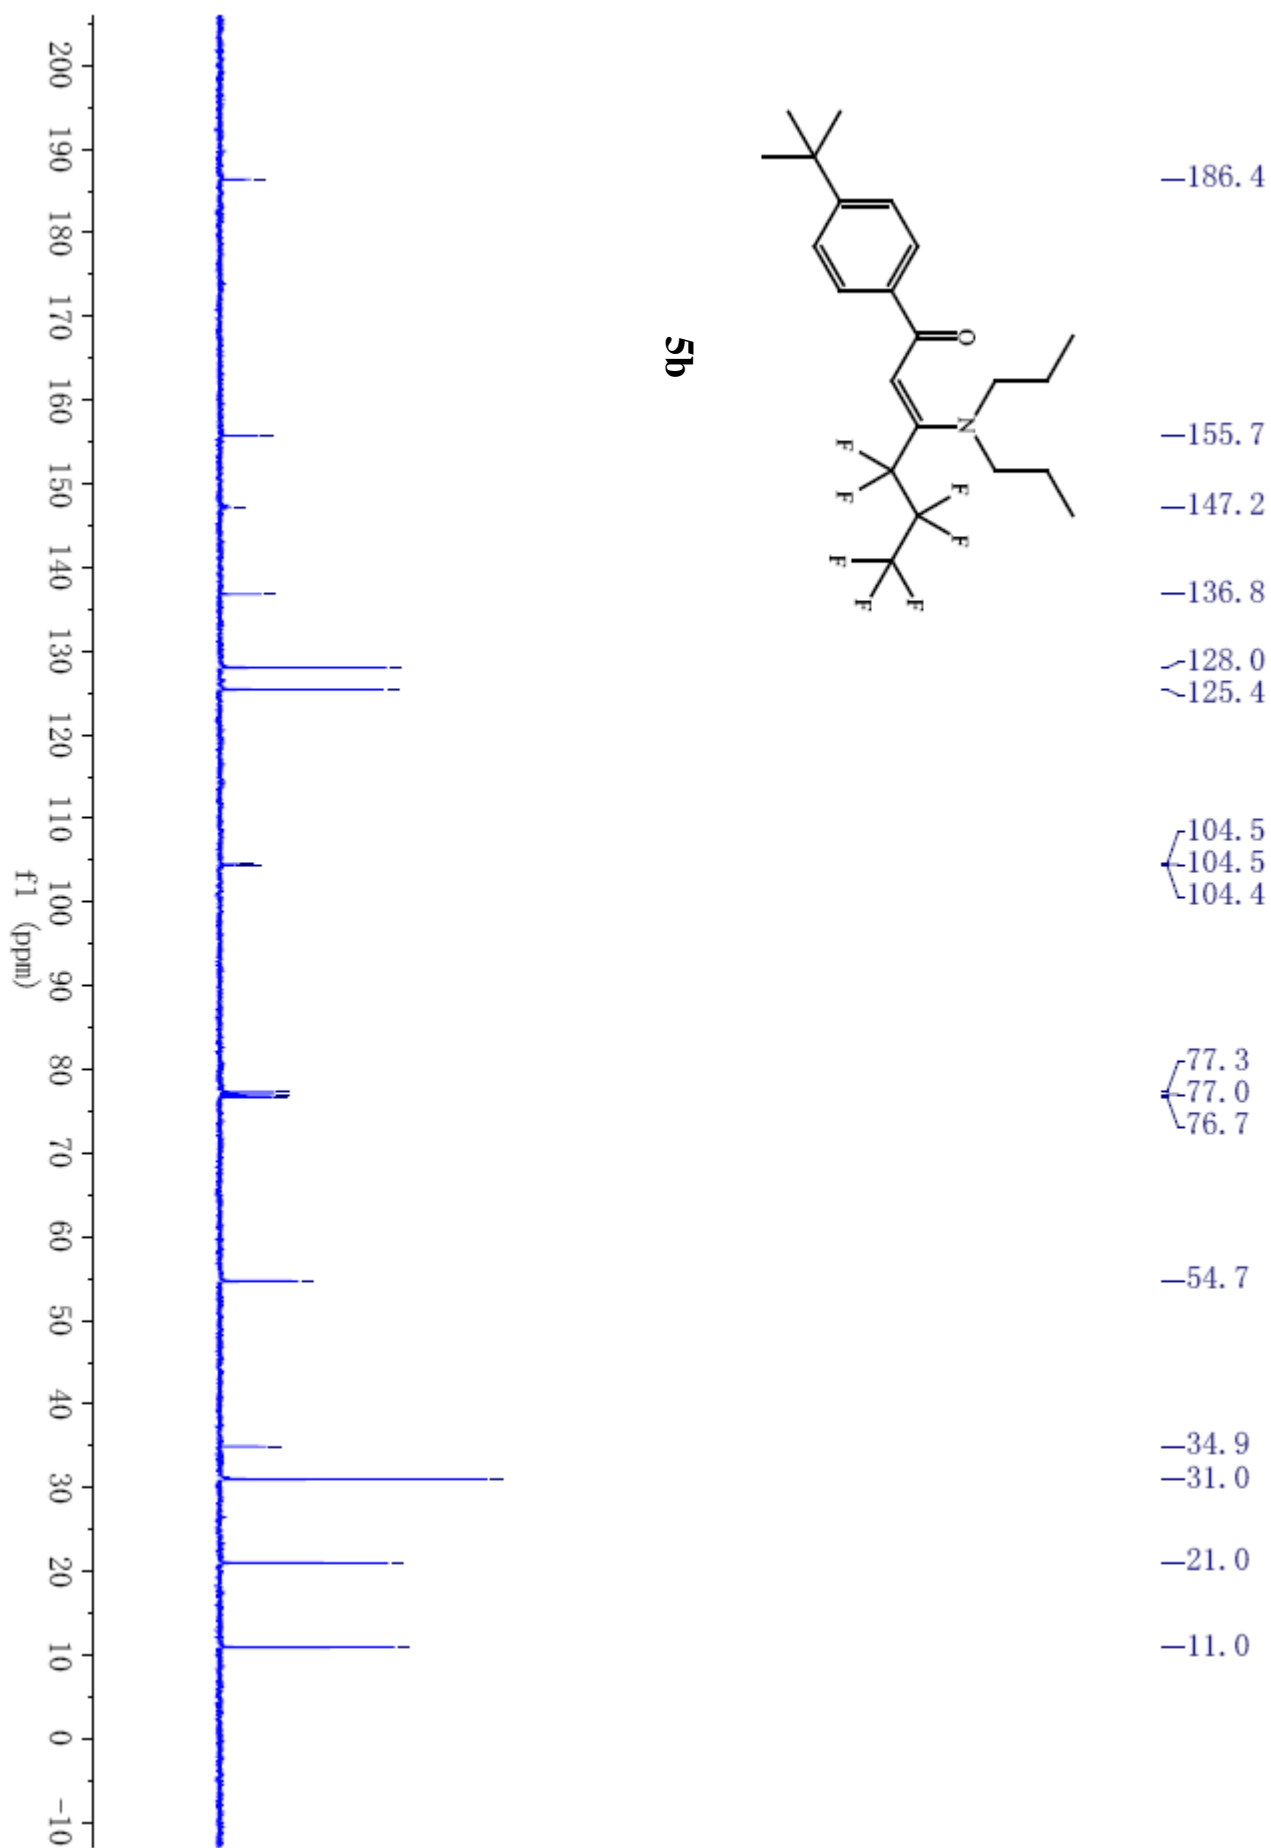

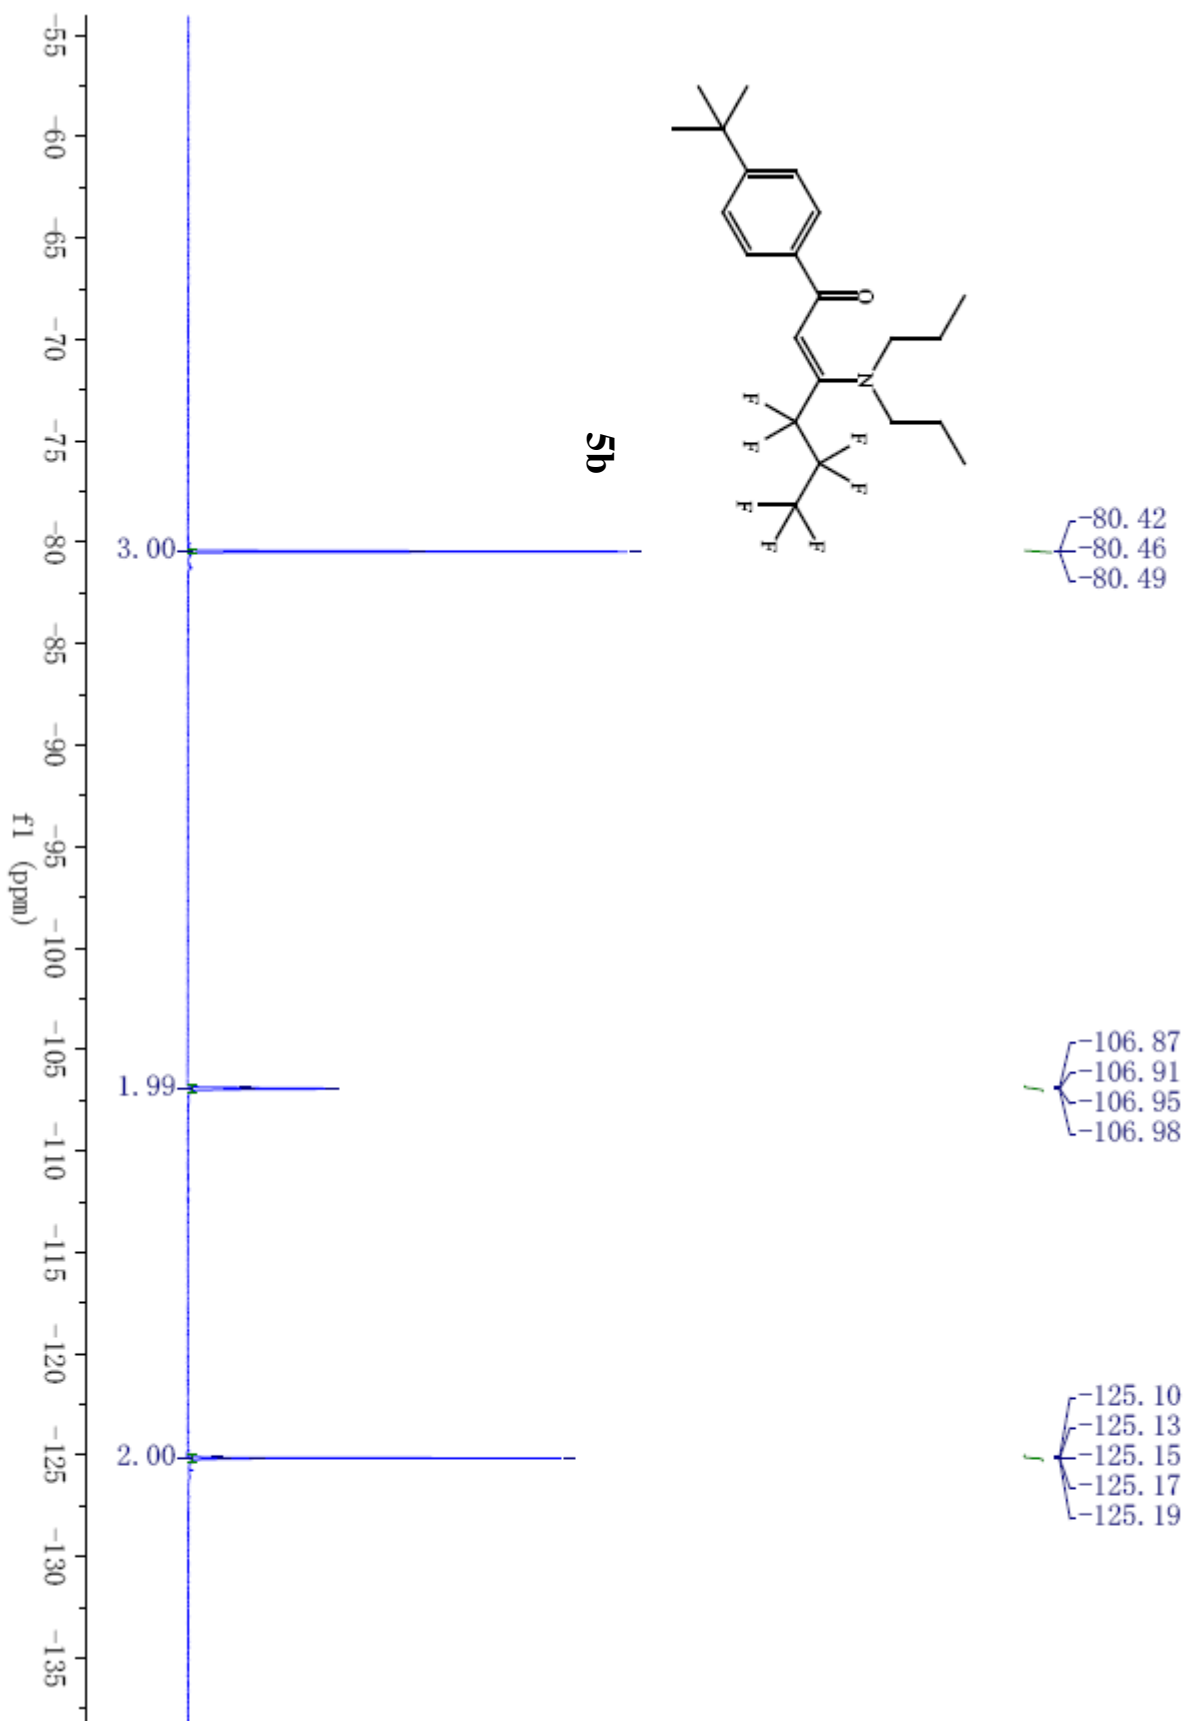

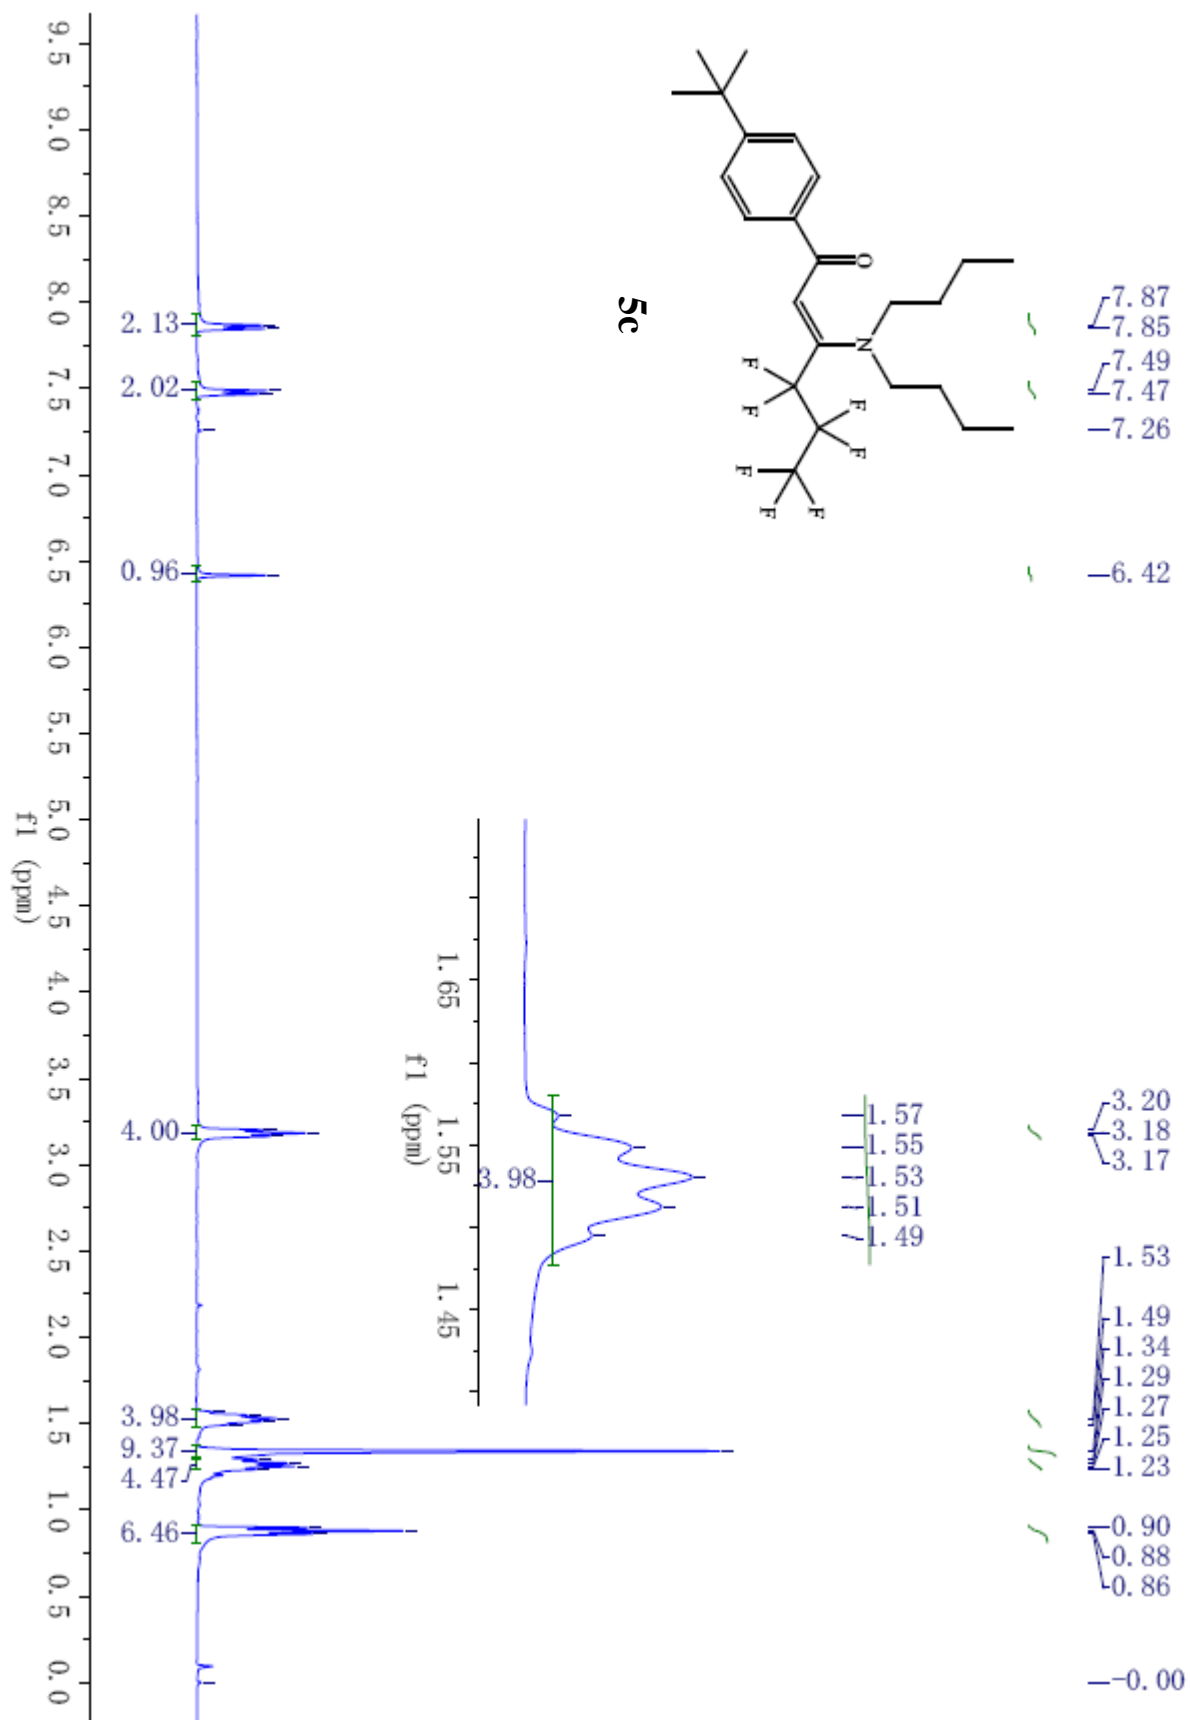

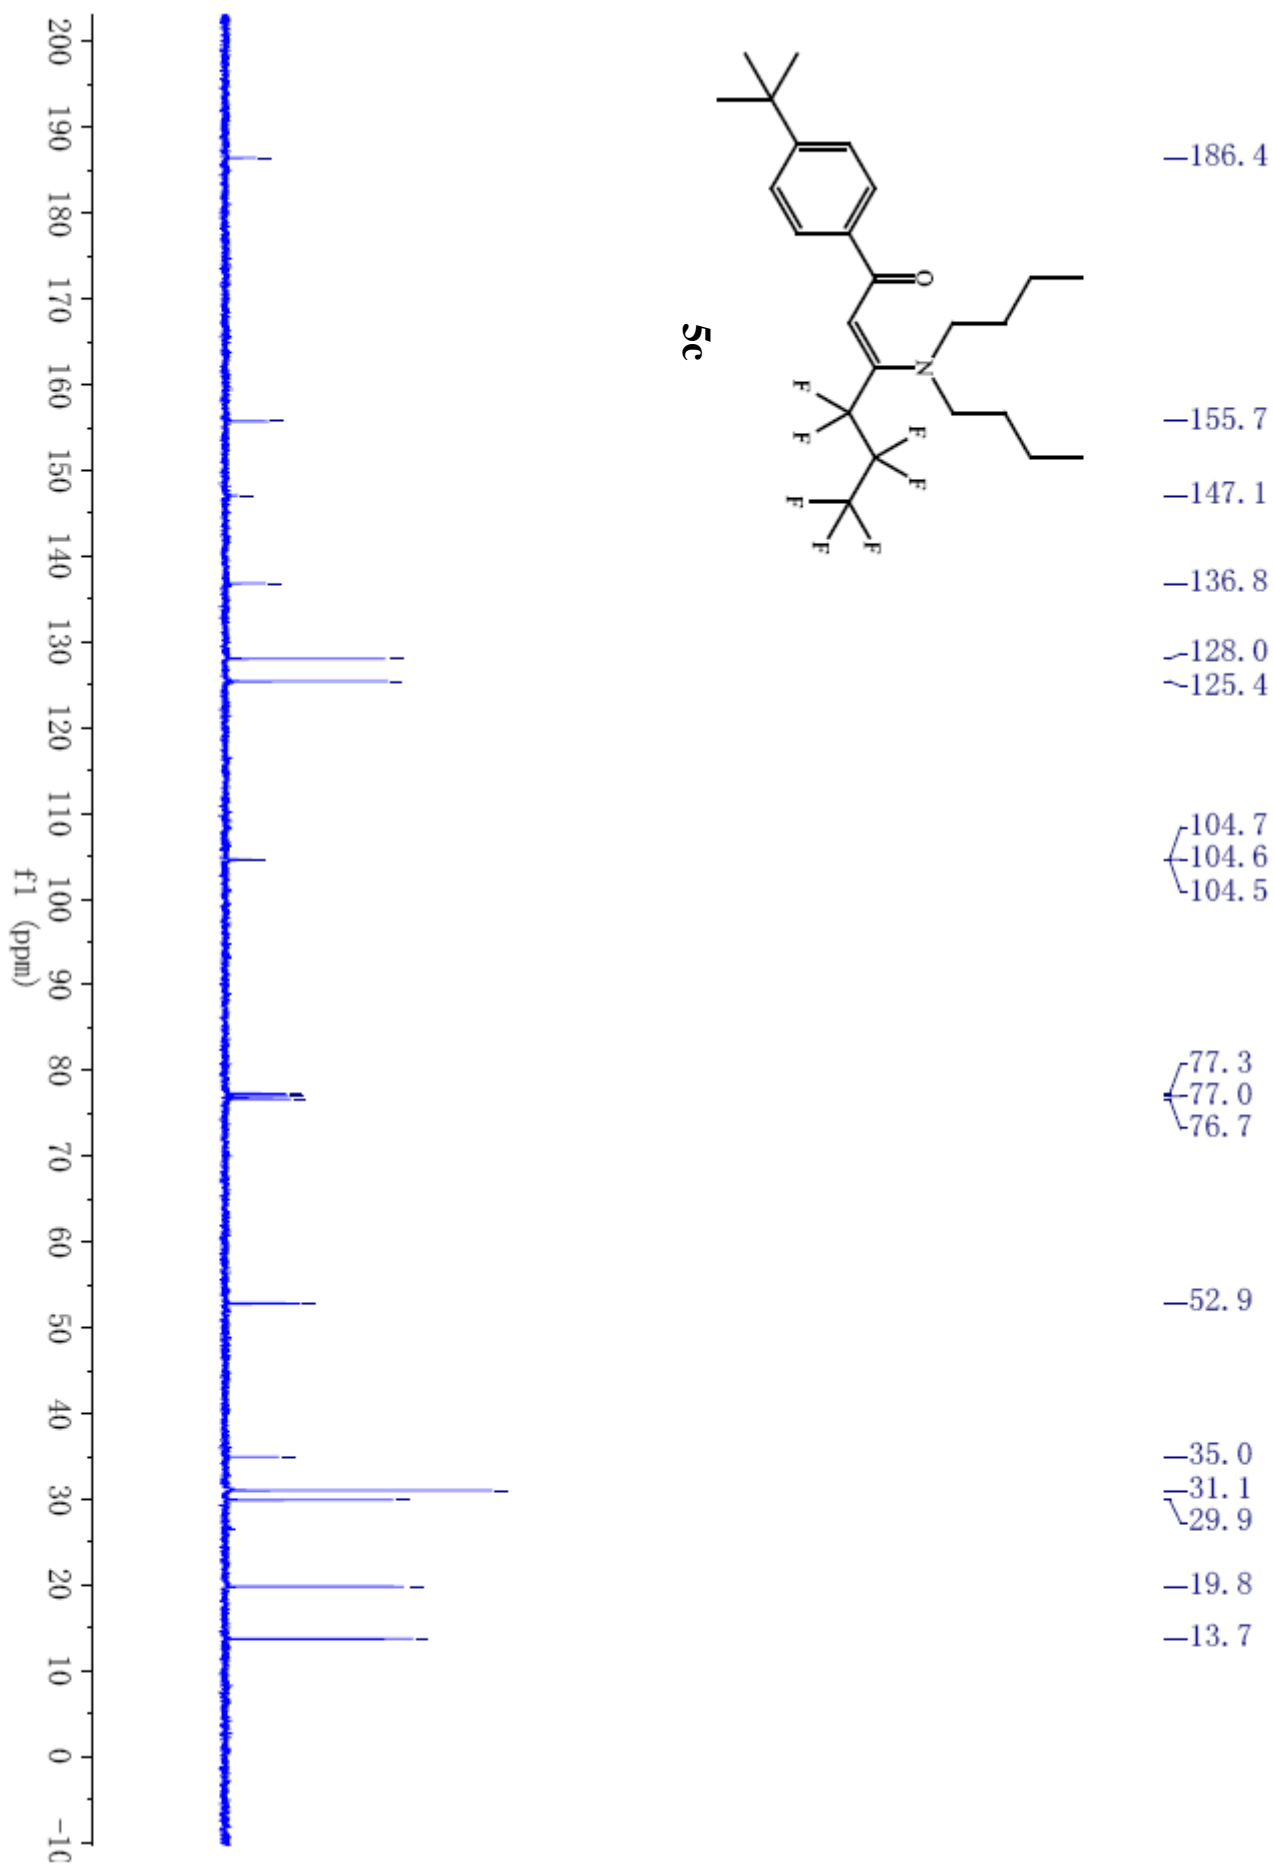



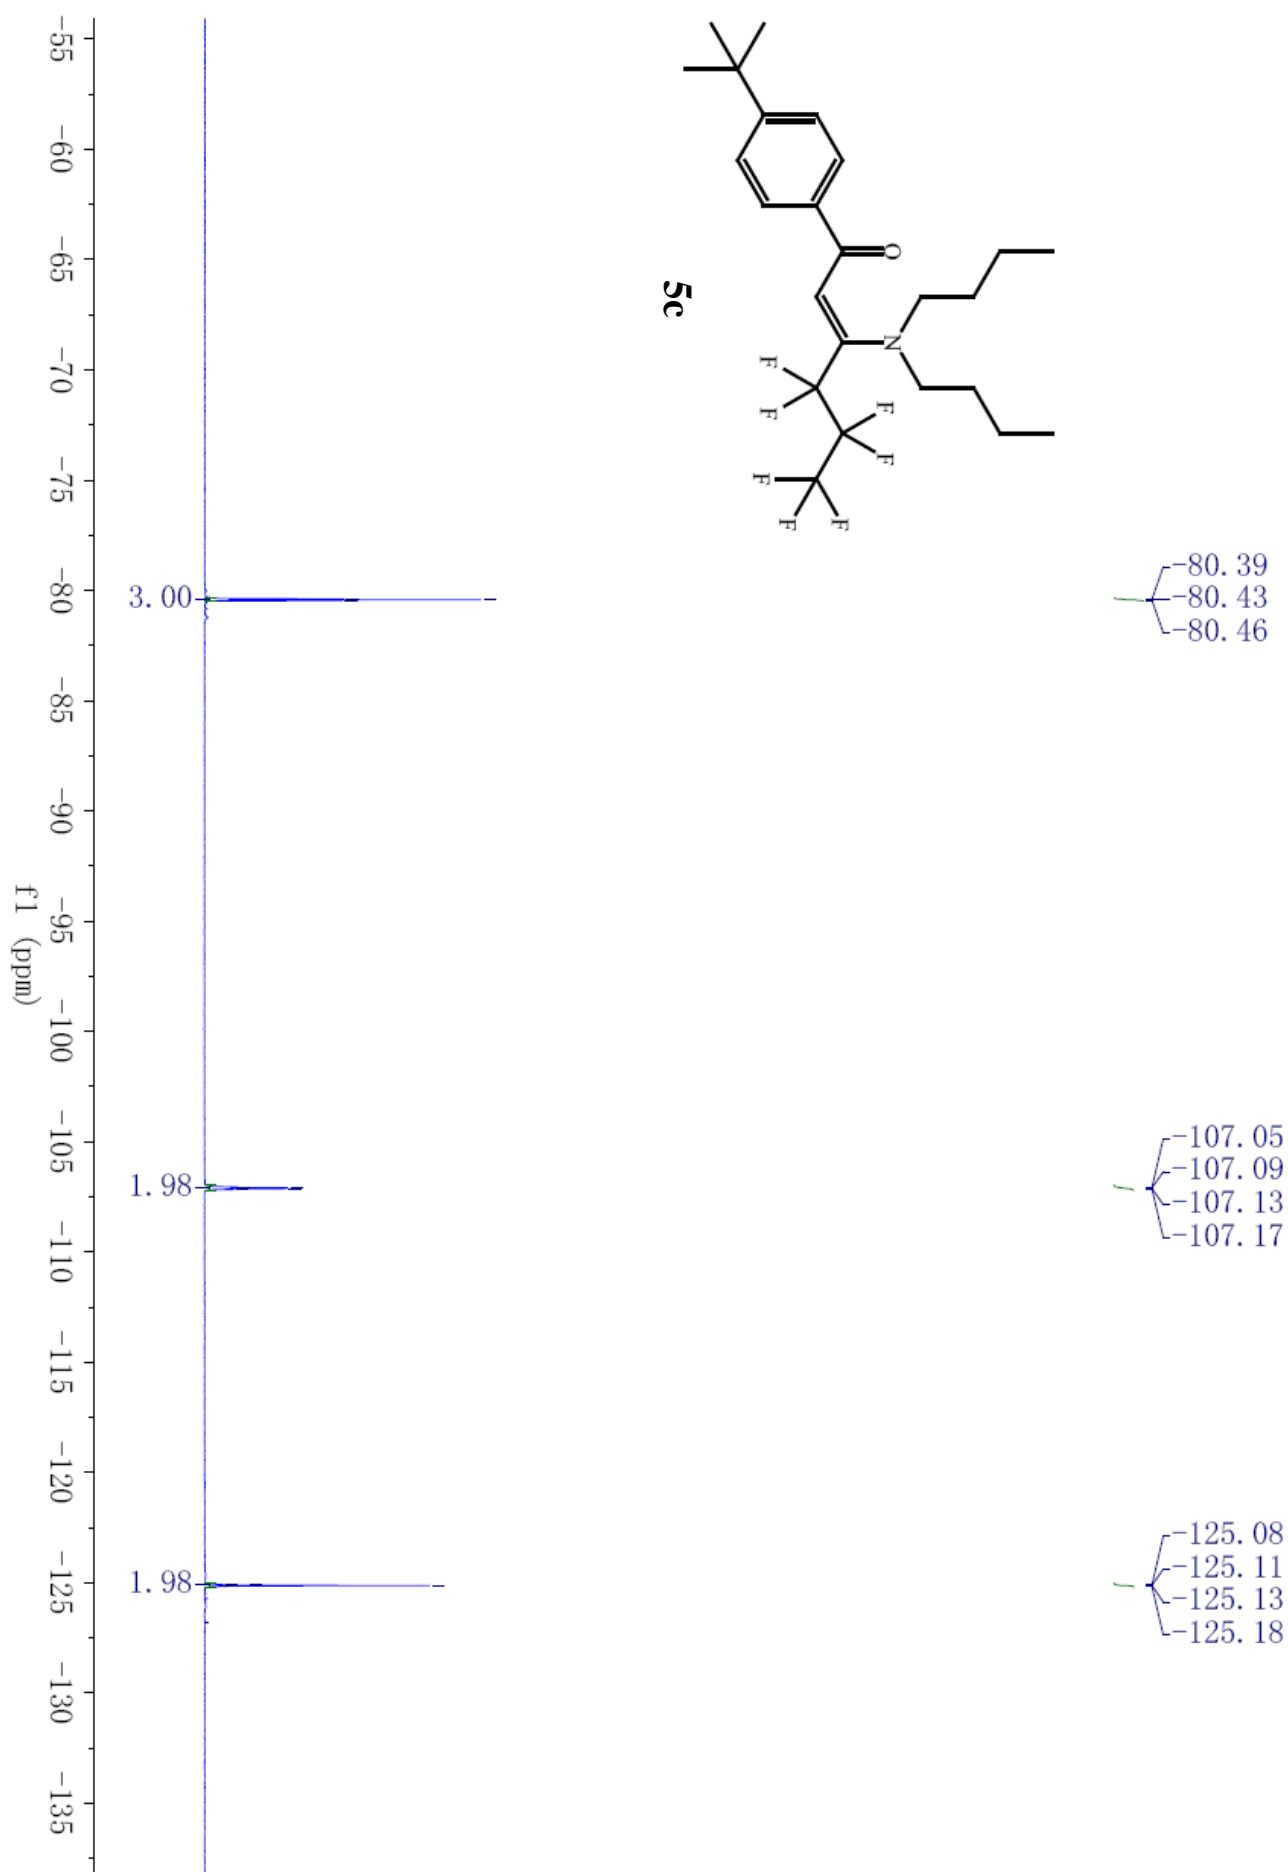

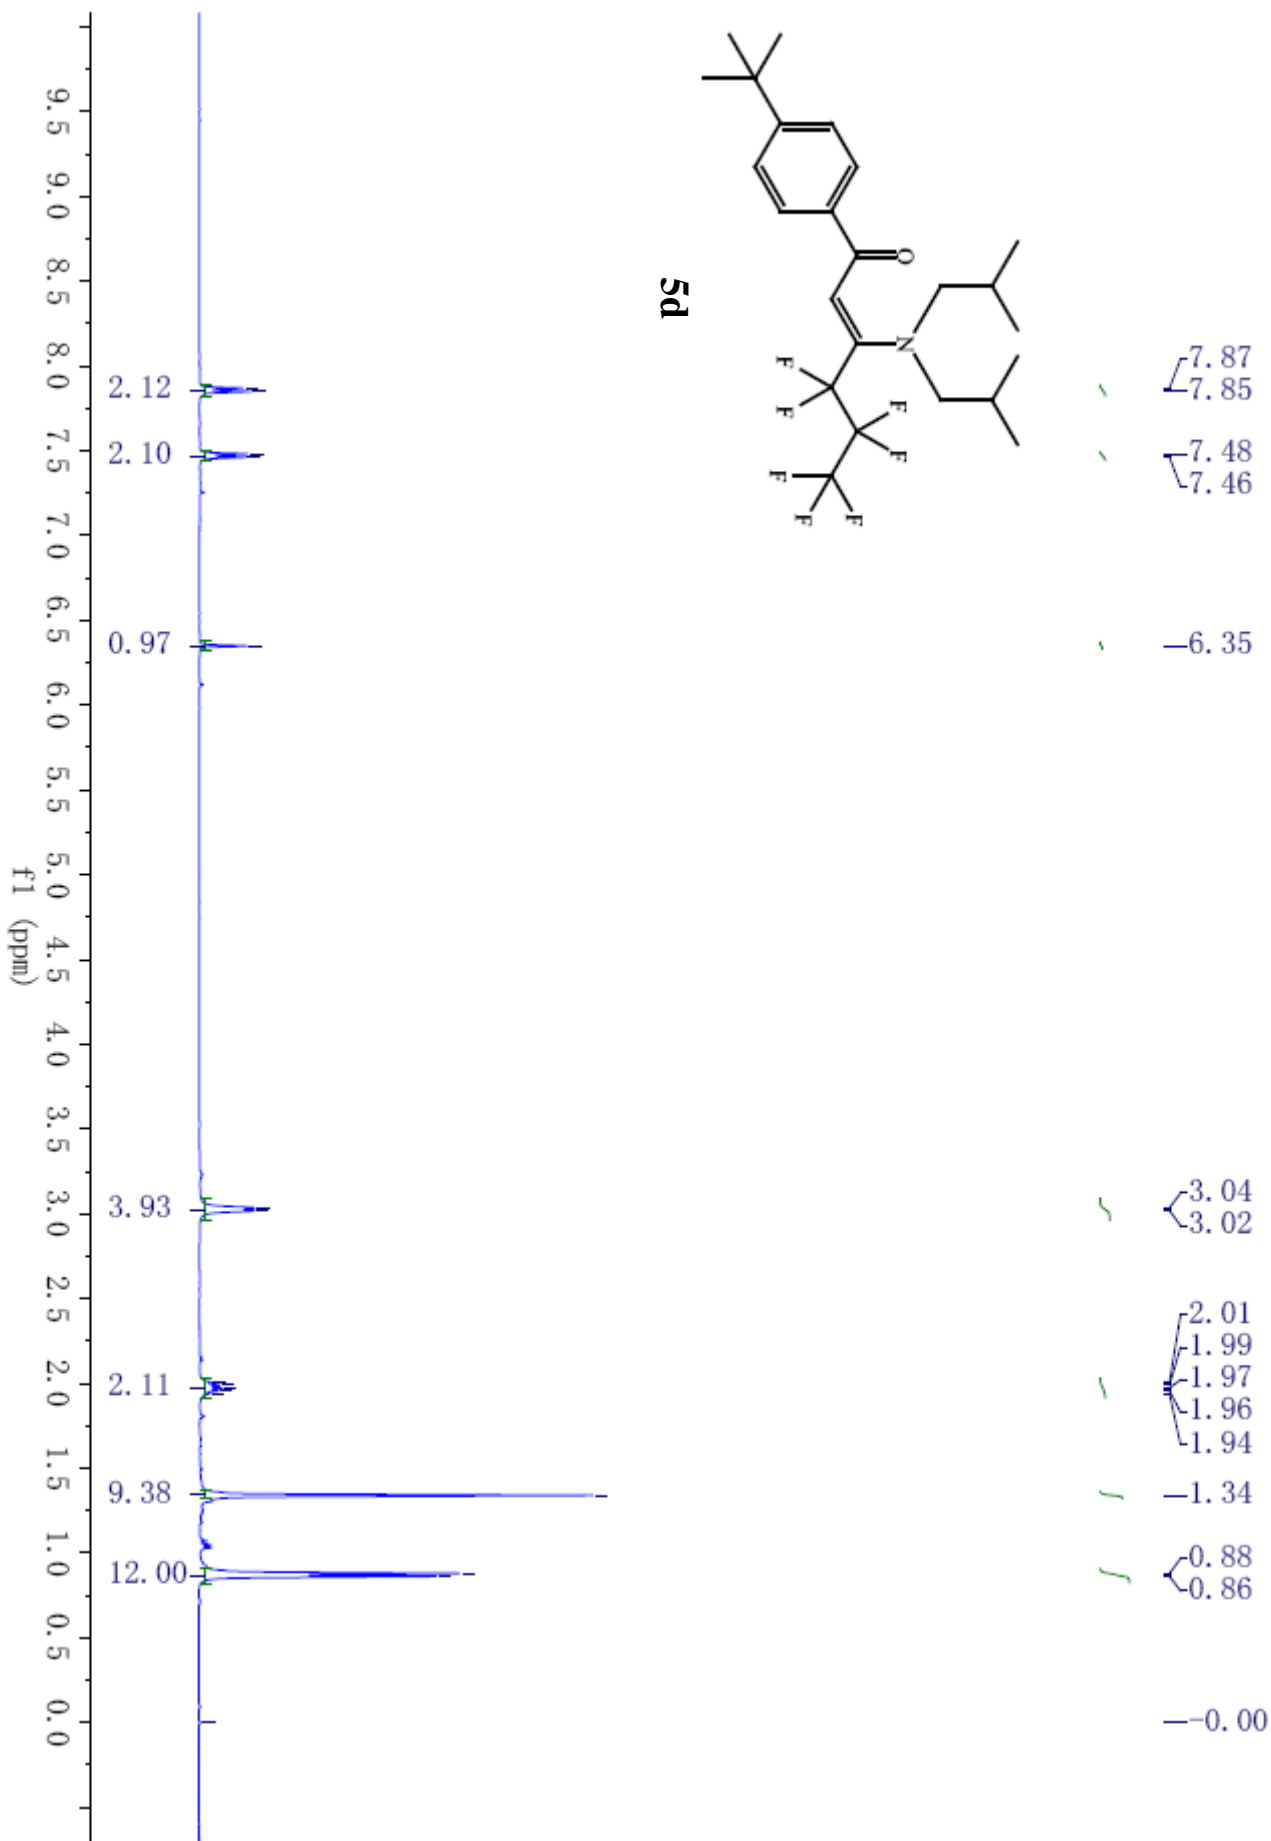

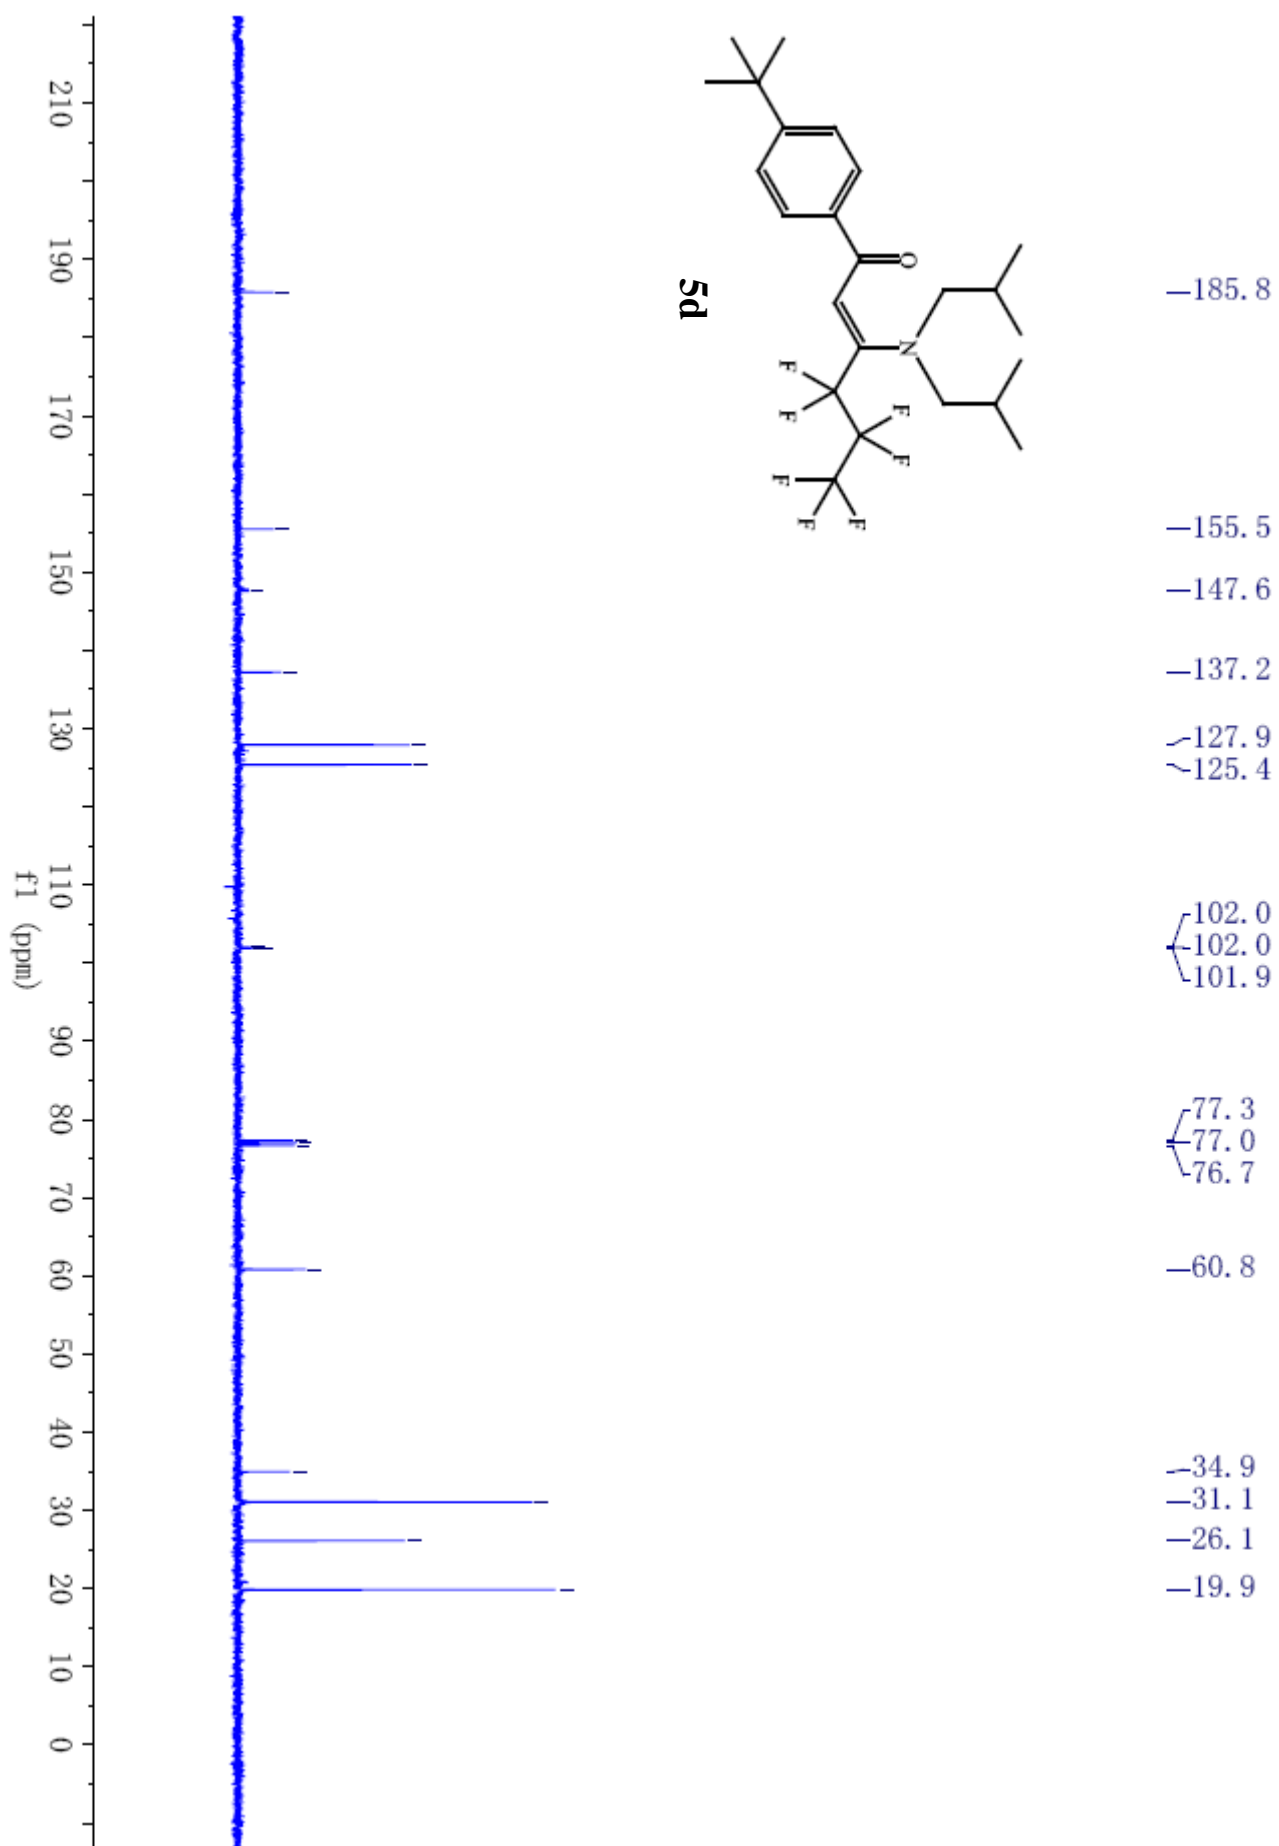

5d

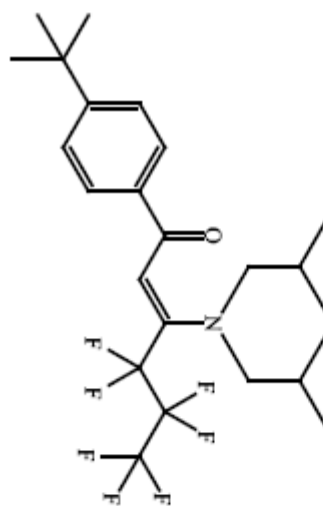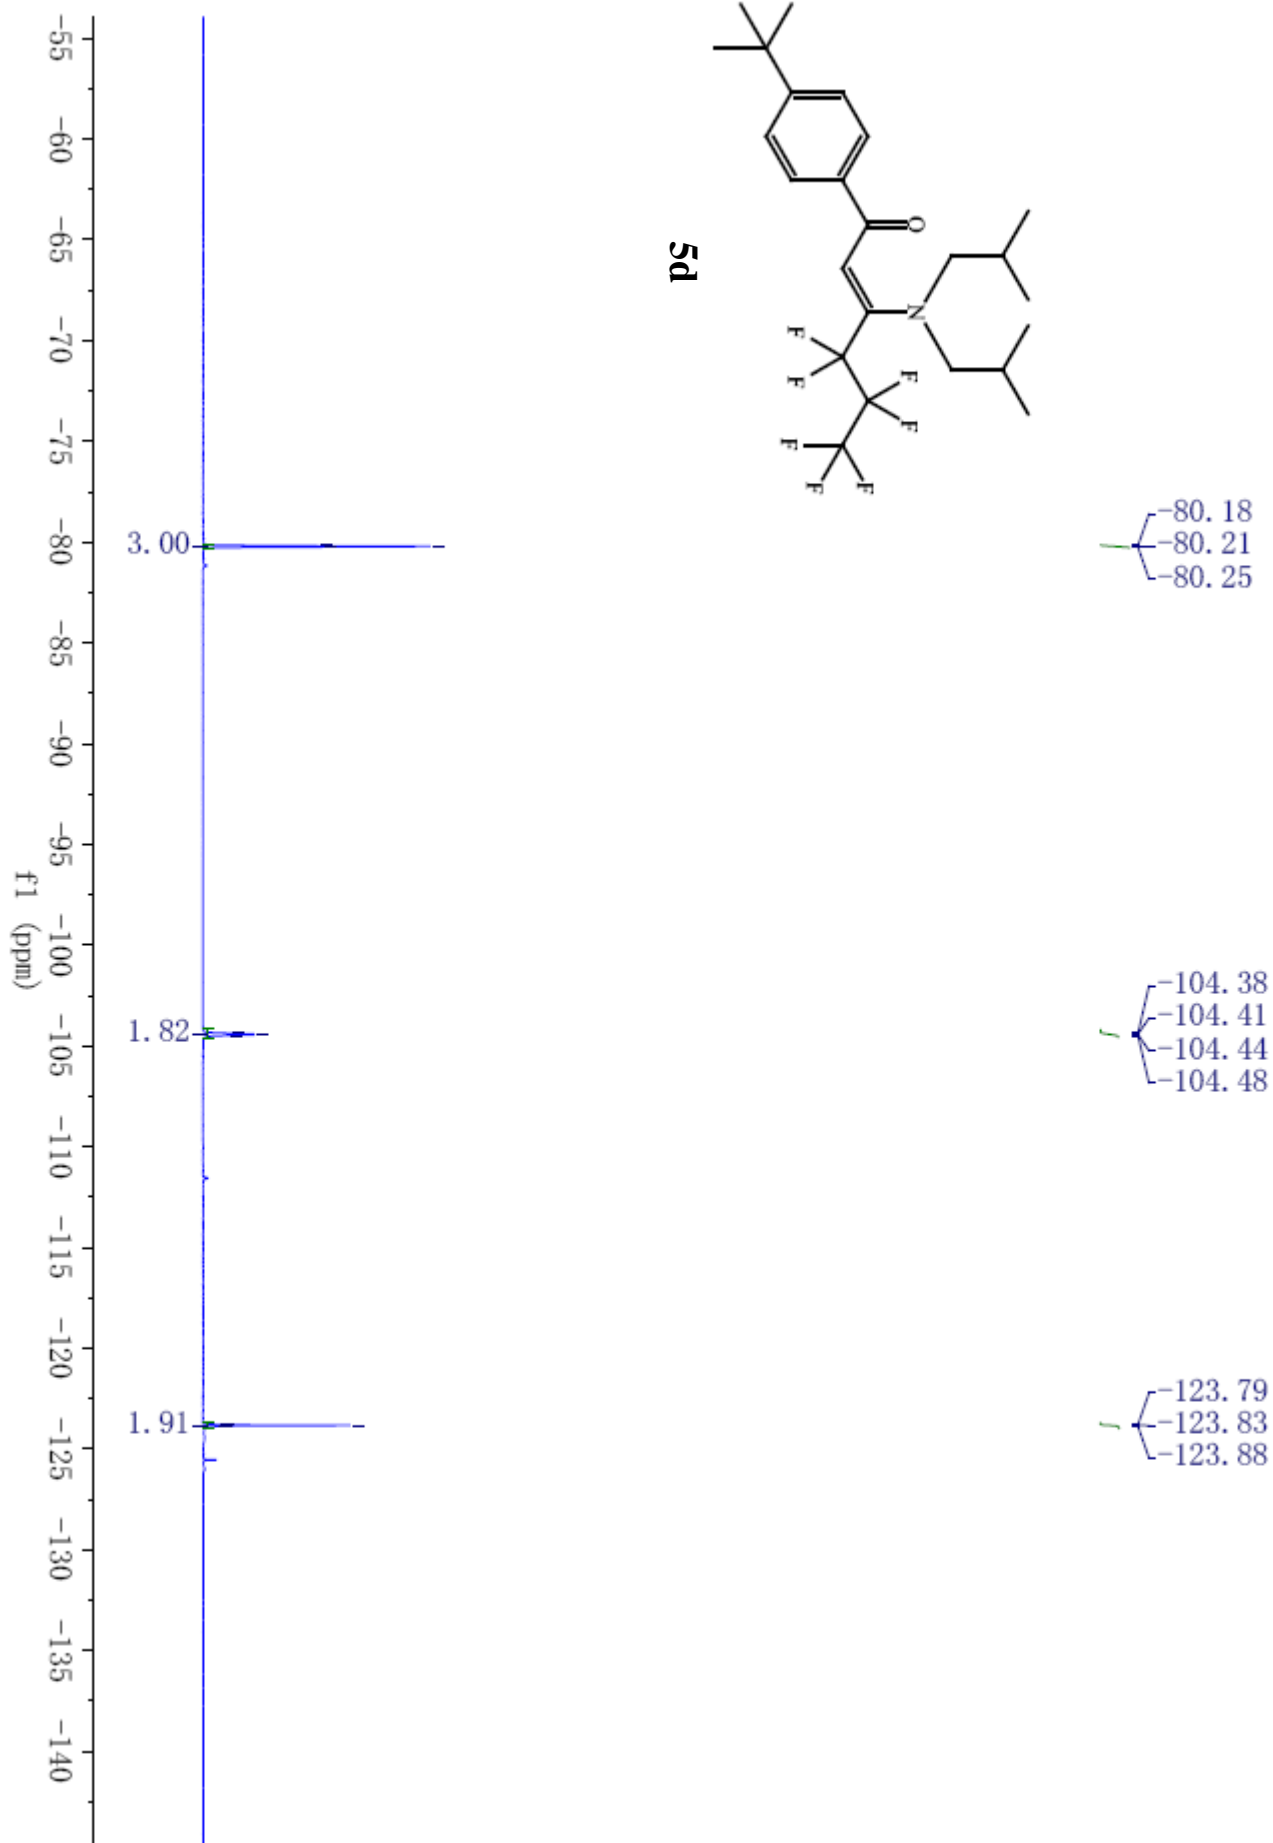

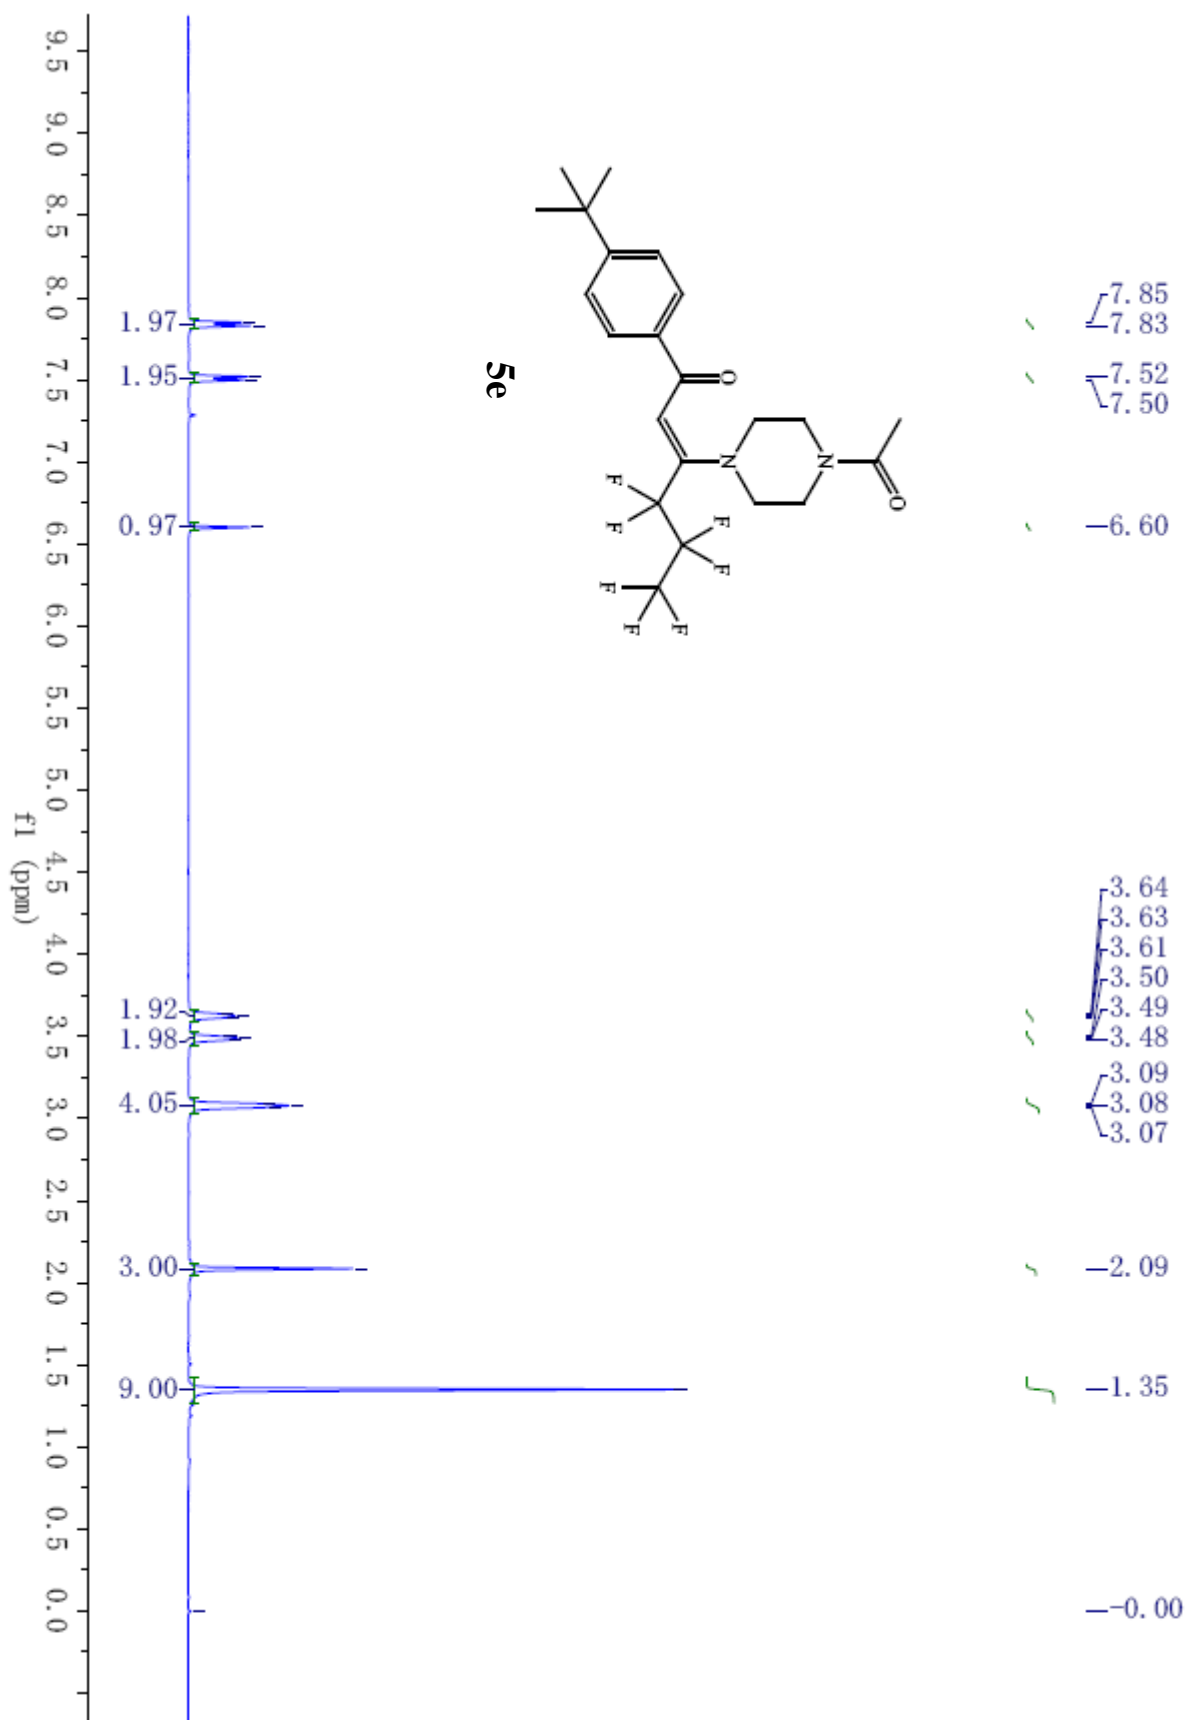

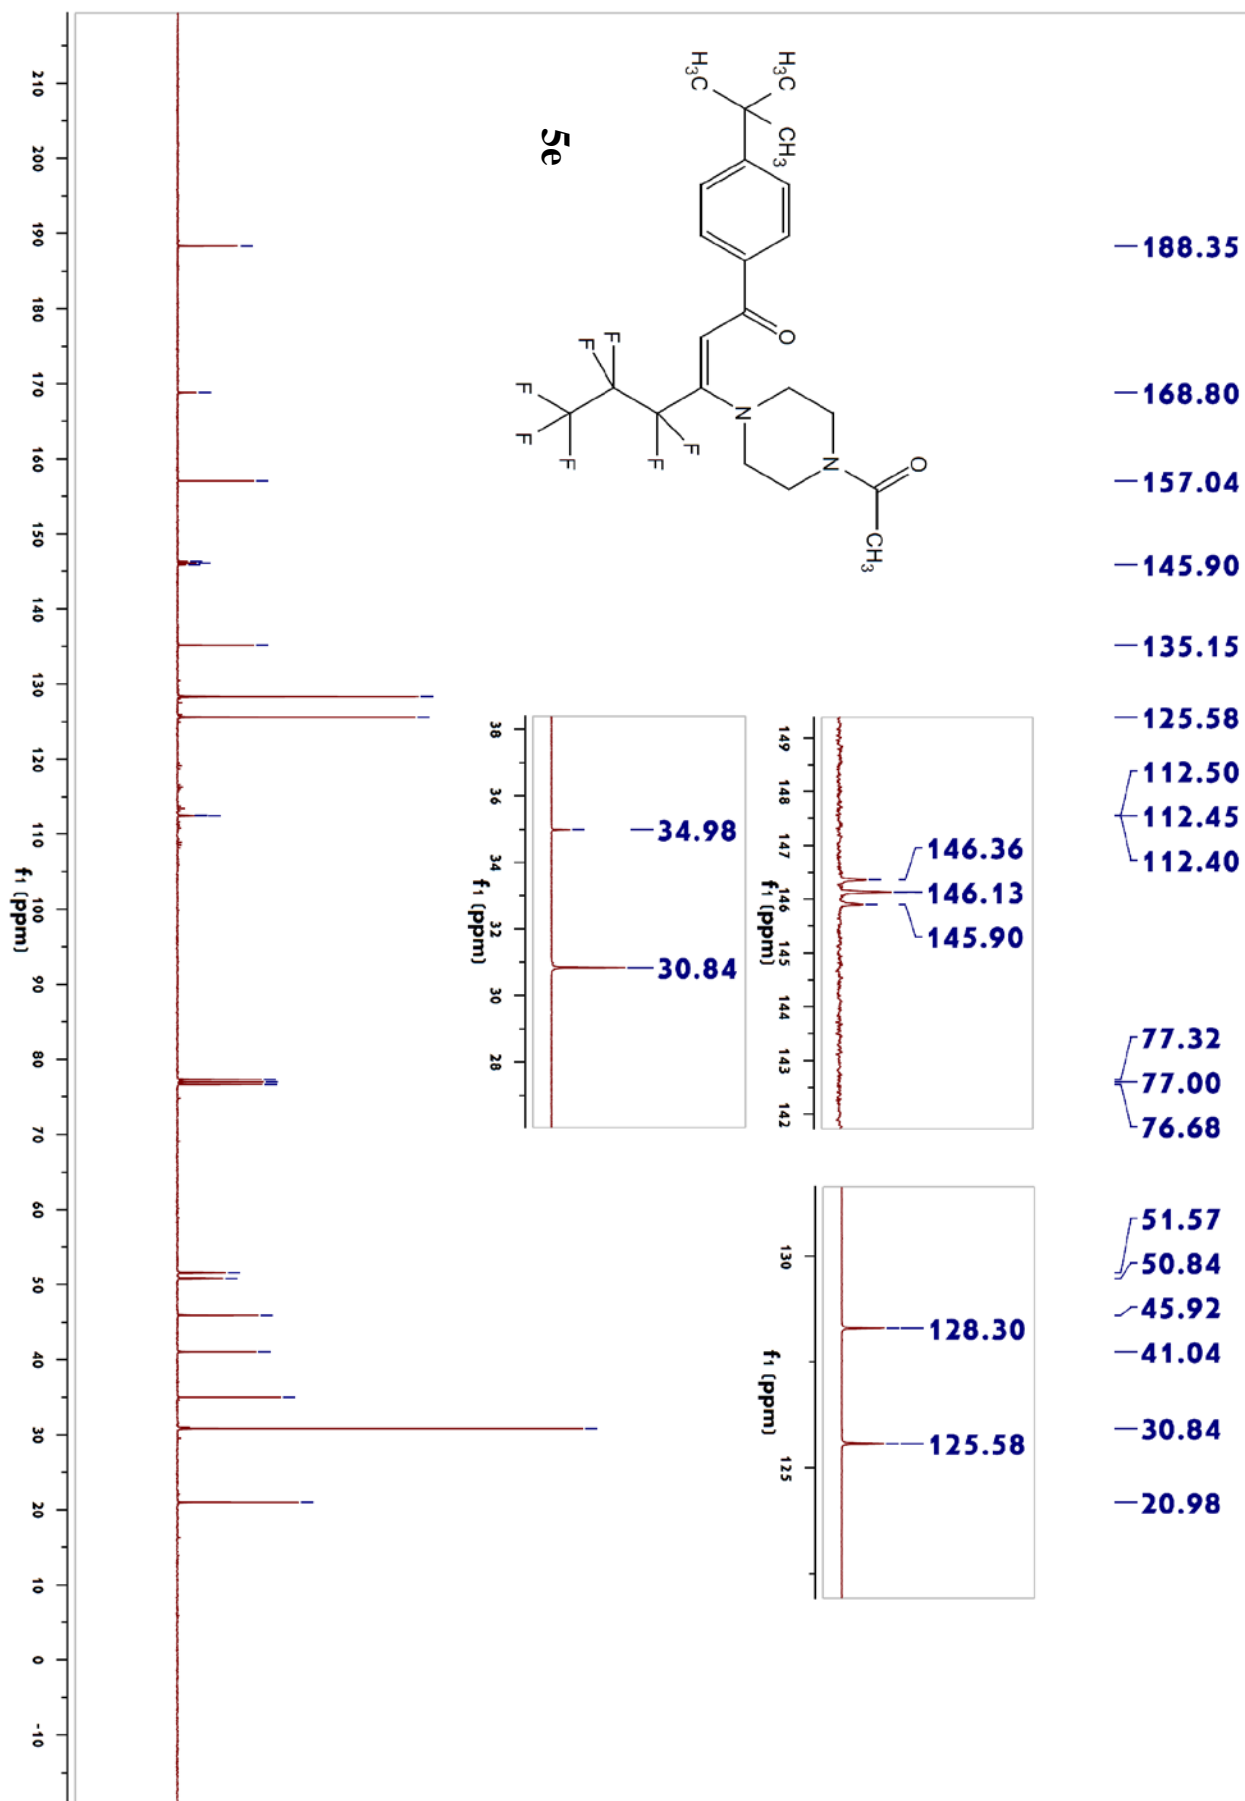

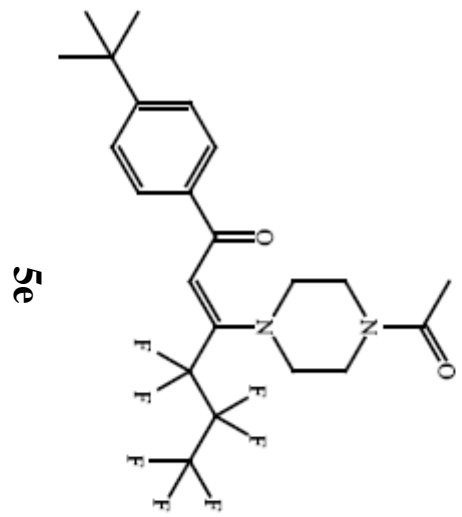

-80.33  
-80.37  
-80.40

-110.49  
-110.53  
-110.56  
-110.59

-125.43  
-125.47  
-125.51

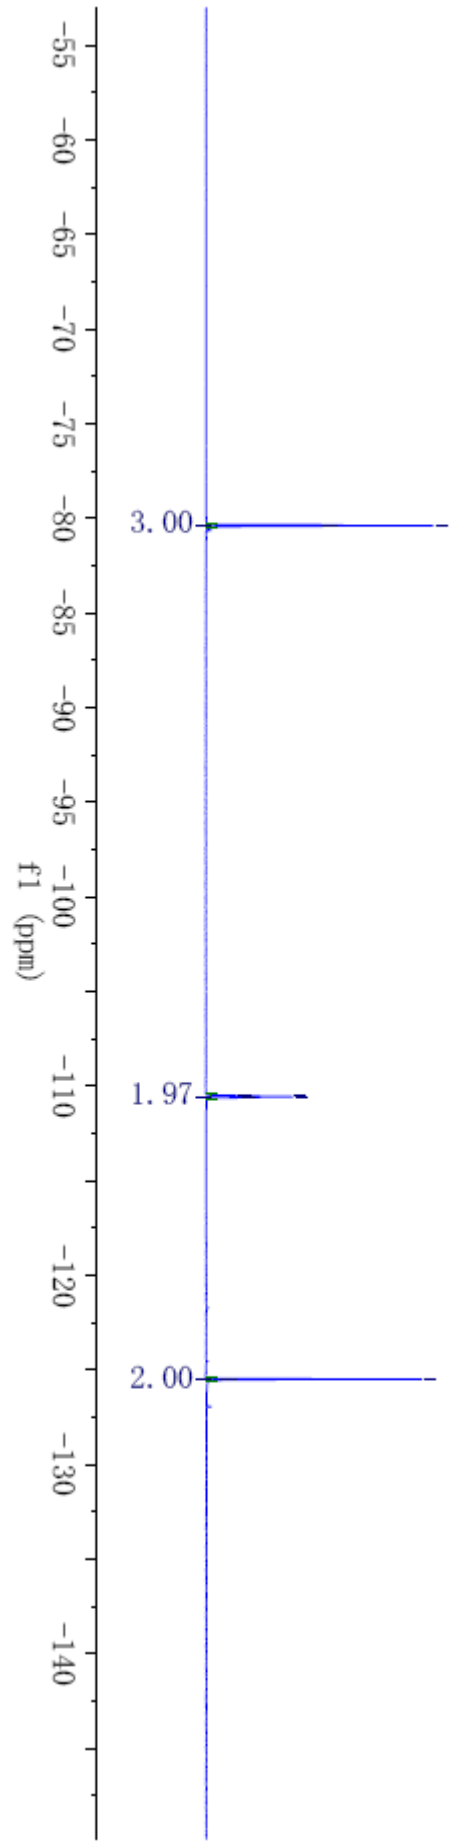

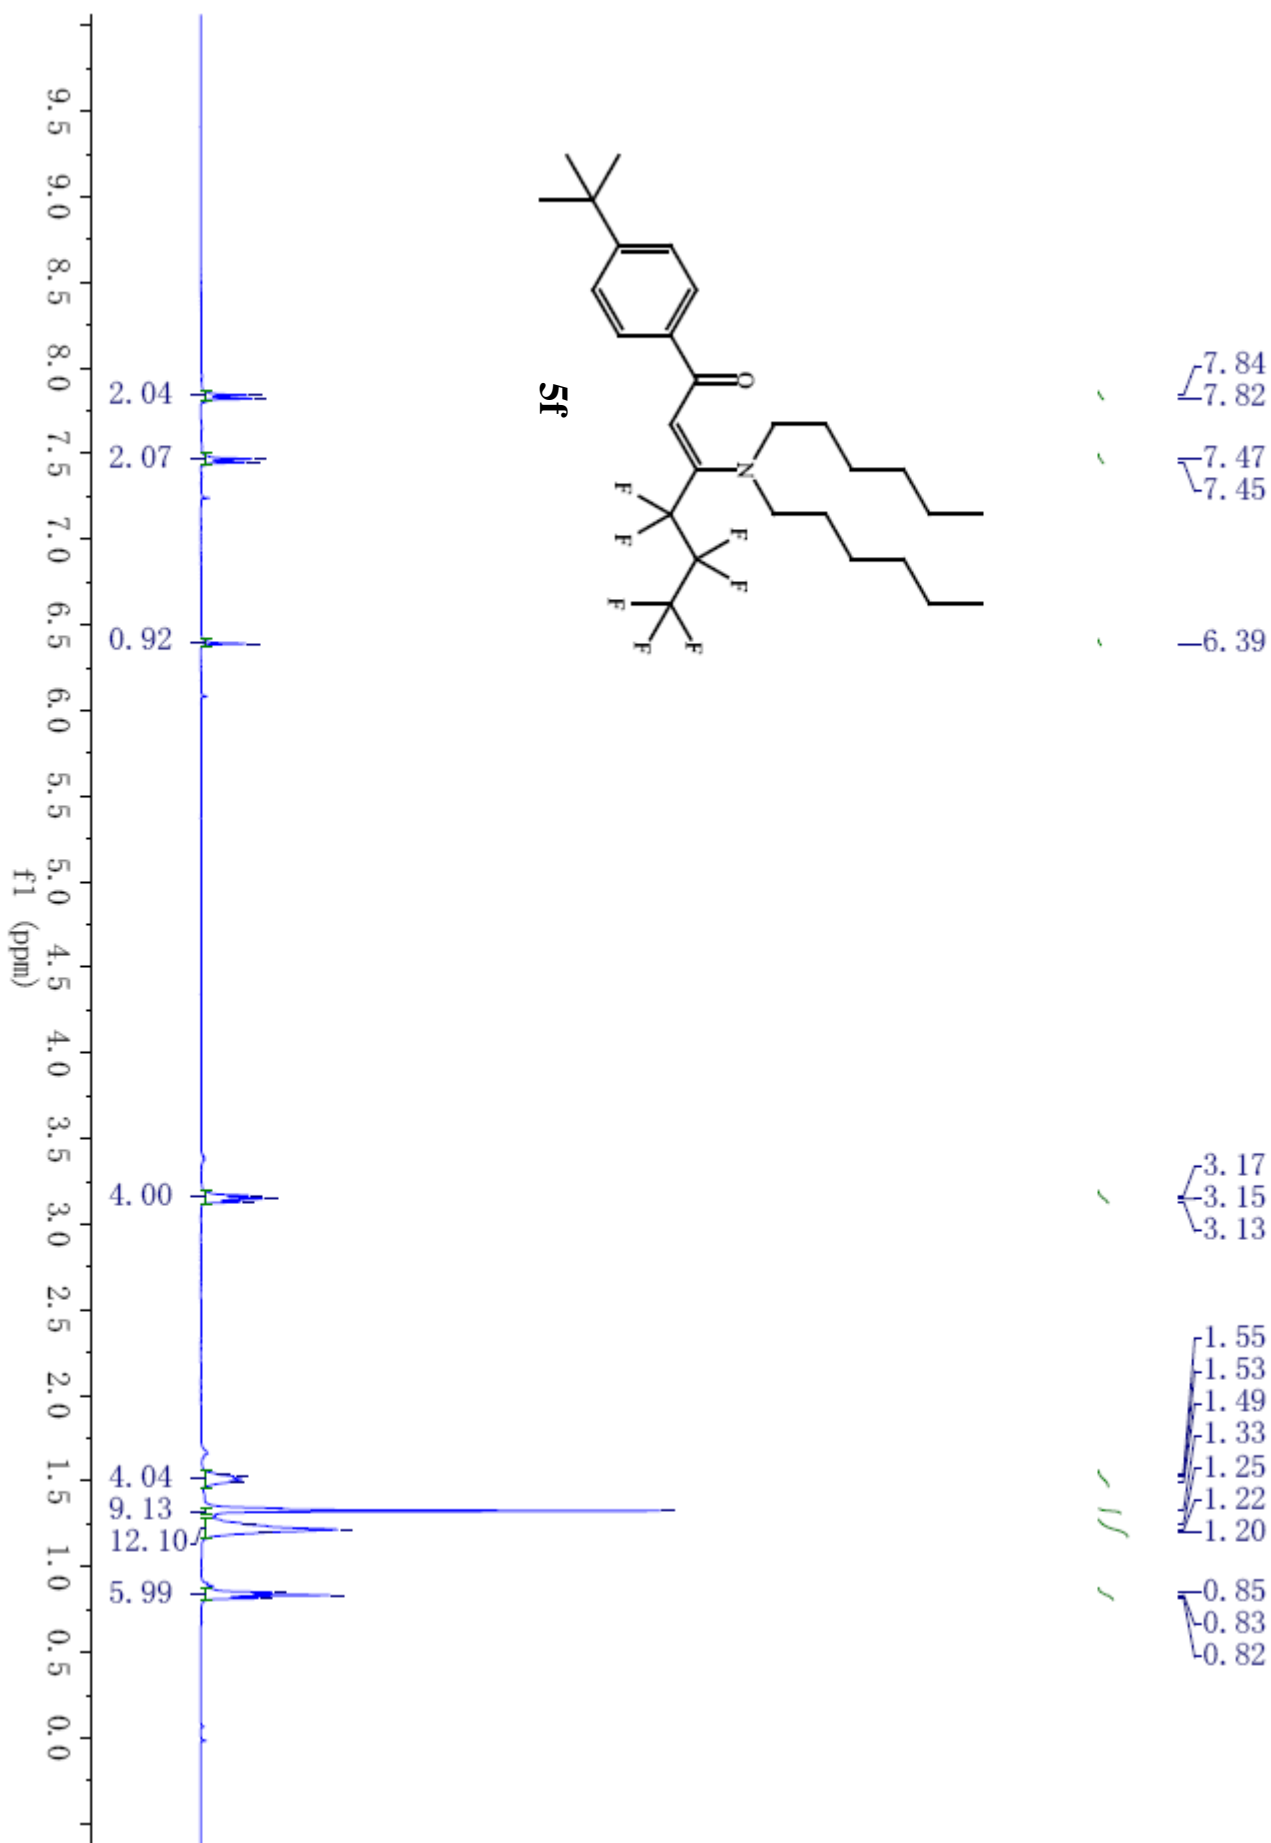



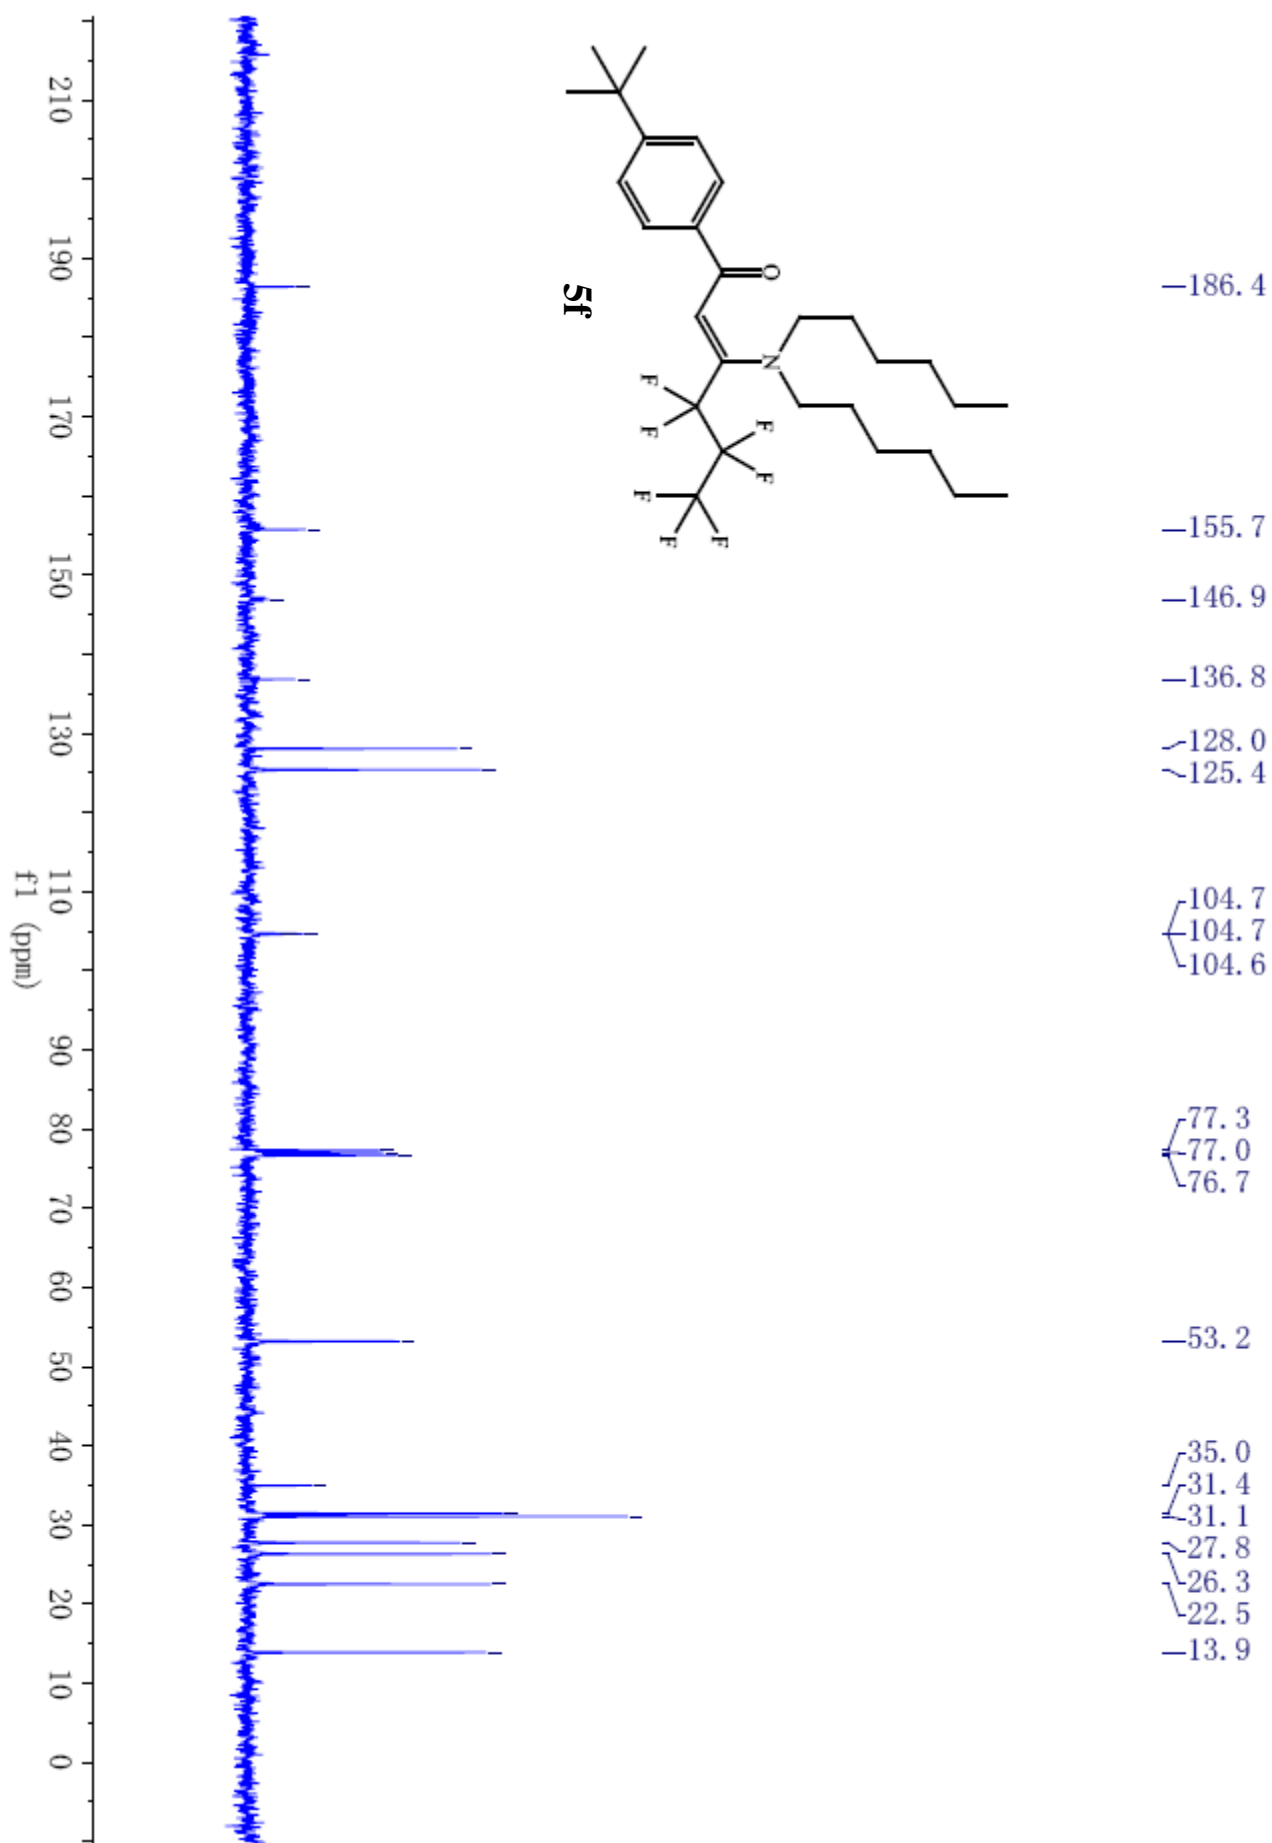

5f

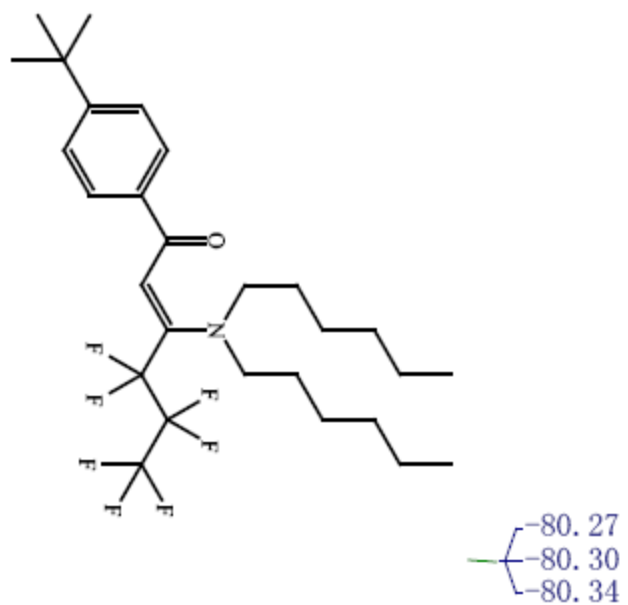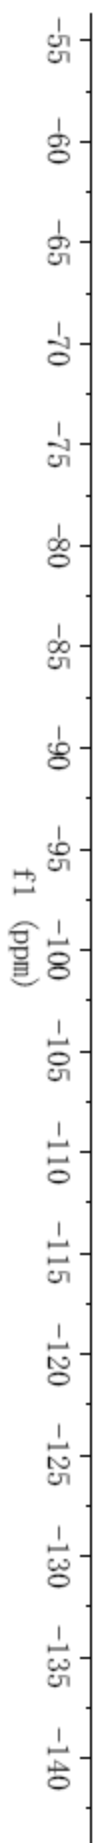

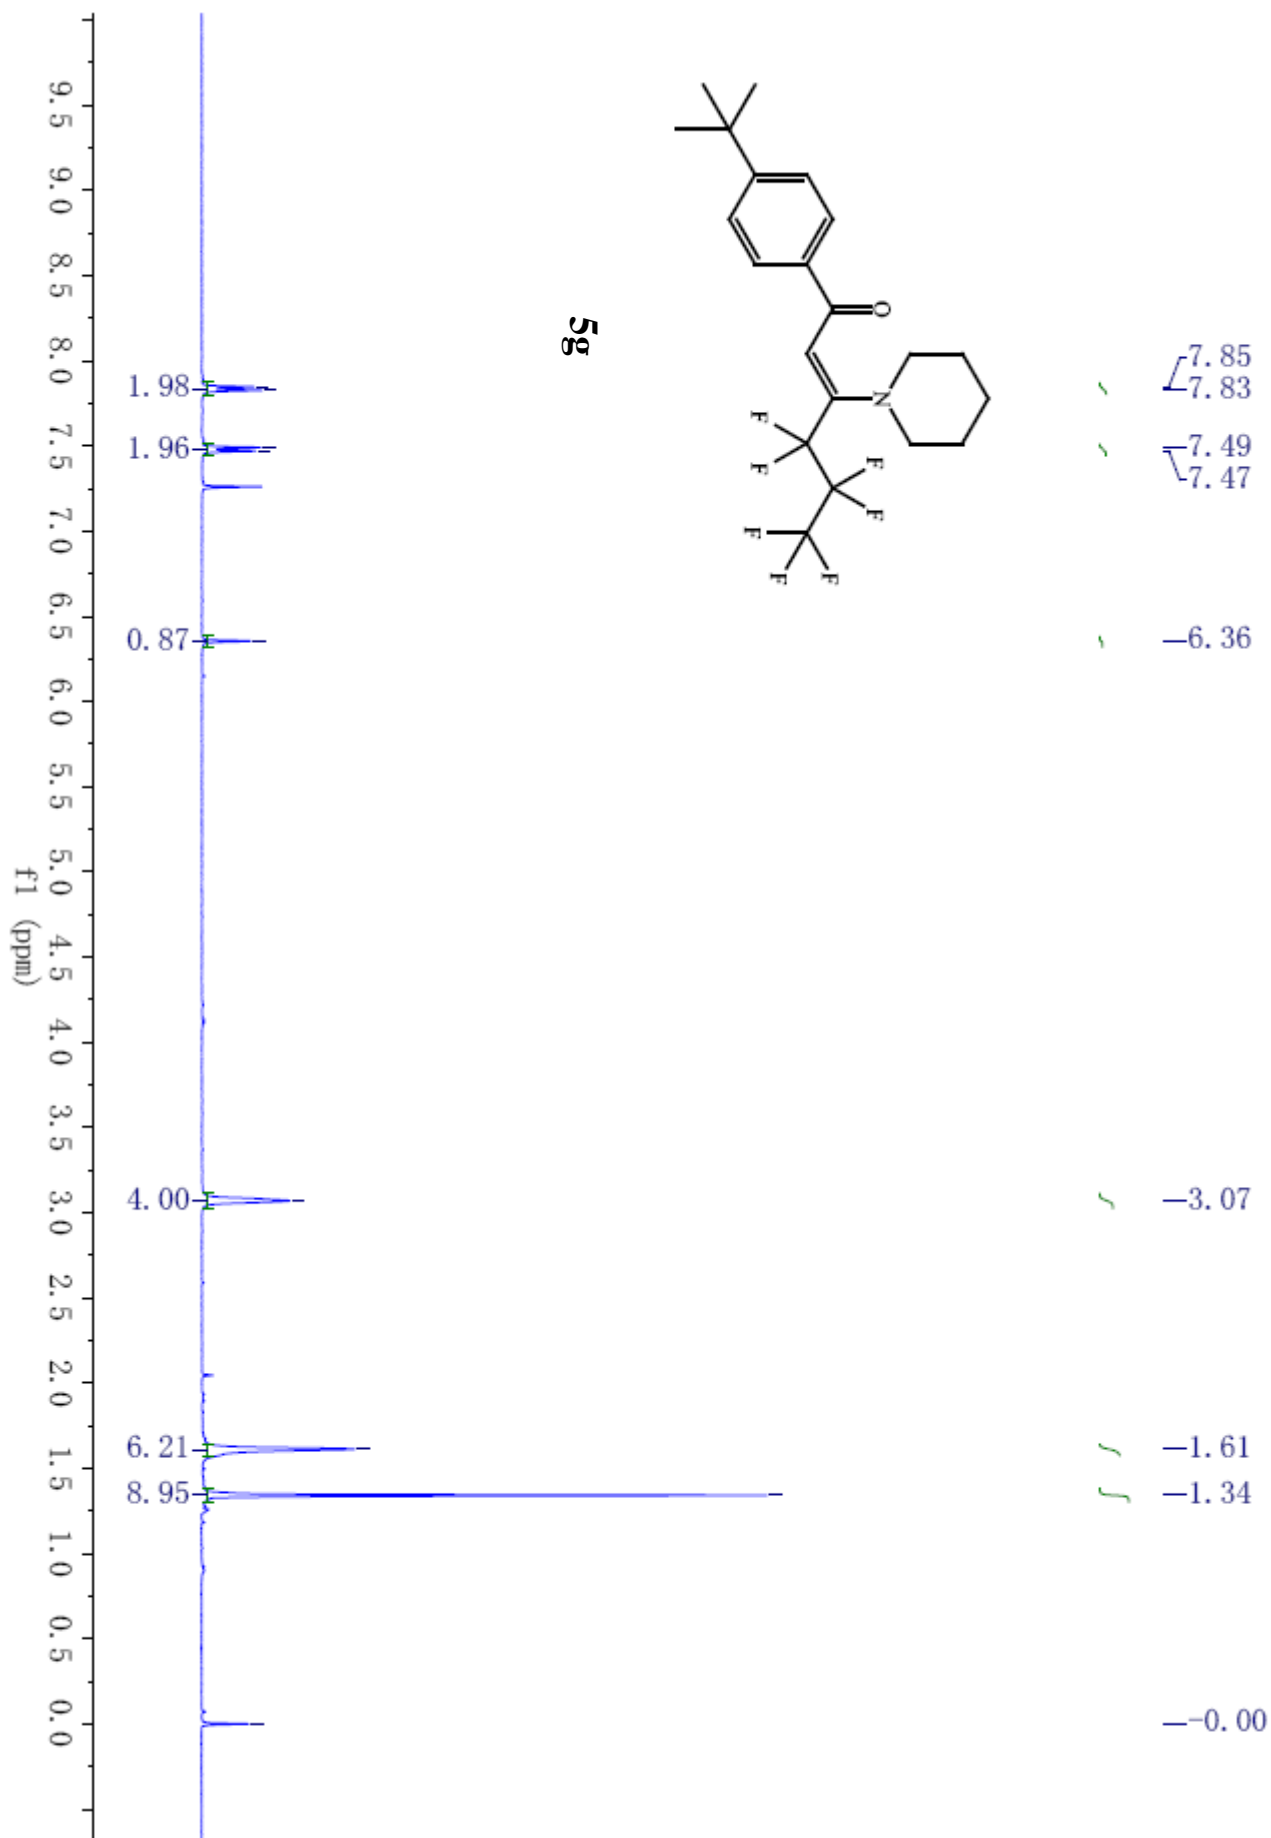

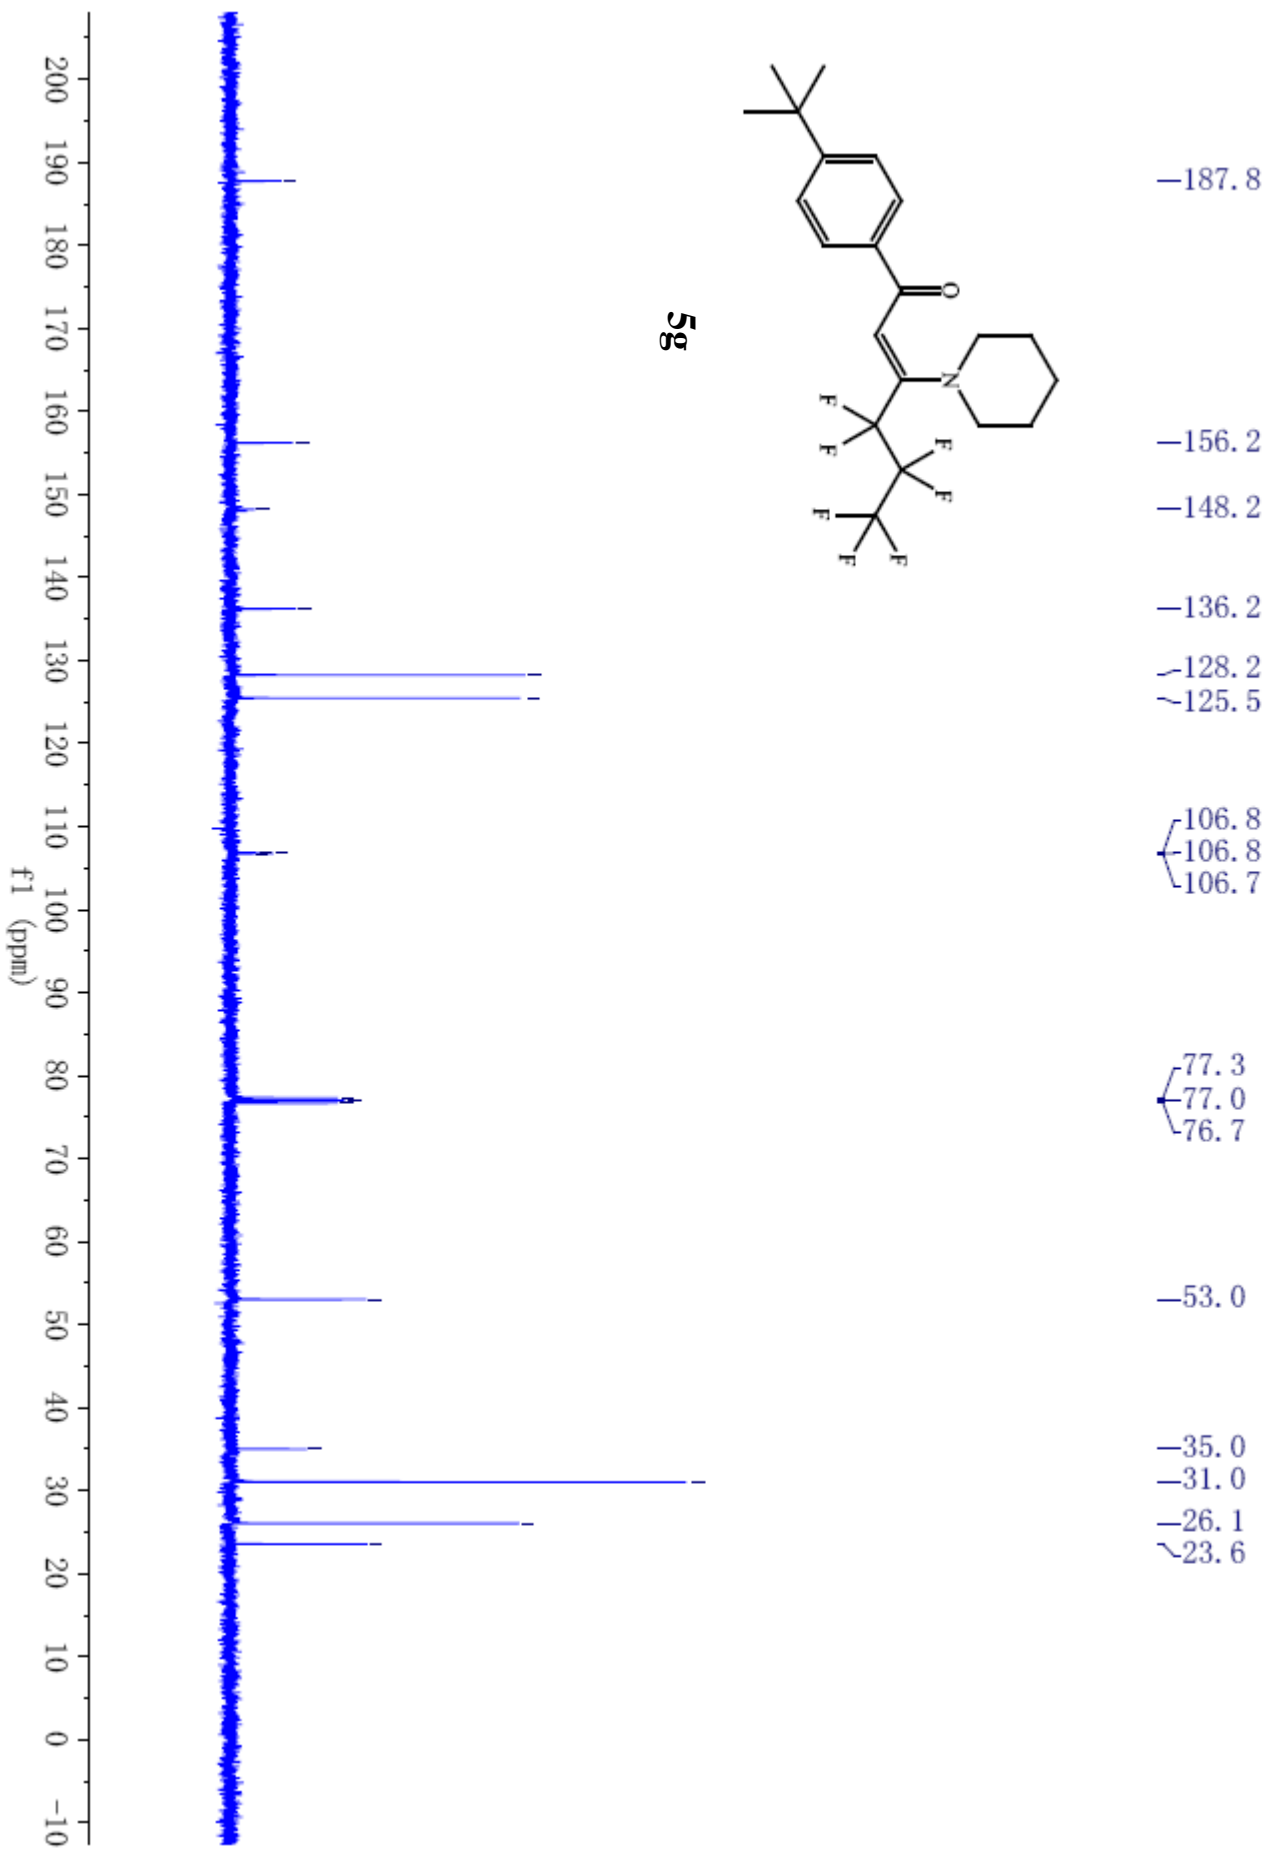

5g

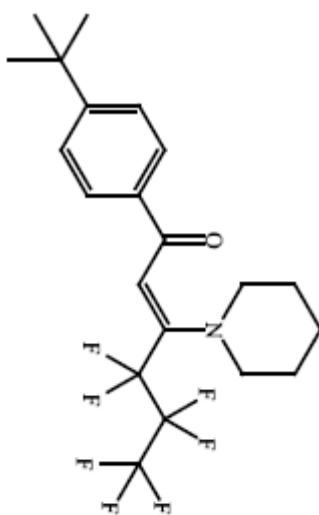

80.37  
80.40  
80.44

109.64  
109.68  
109.71  
109.75

125.03  
125.07  
125.12

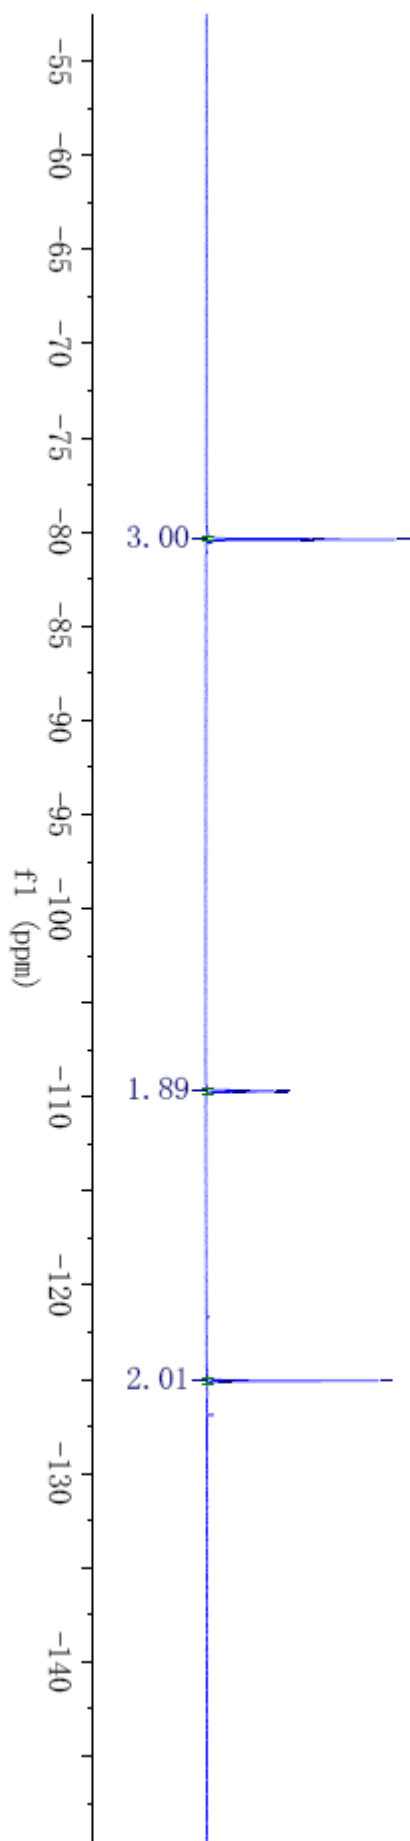

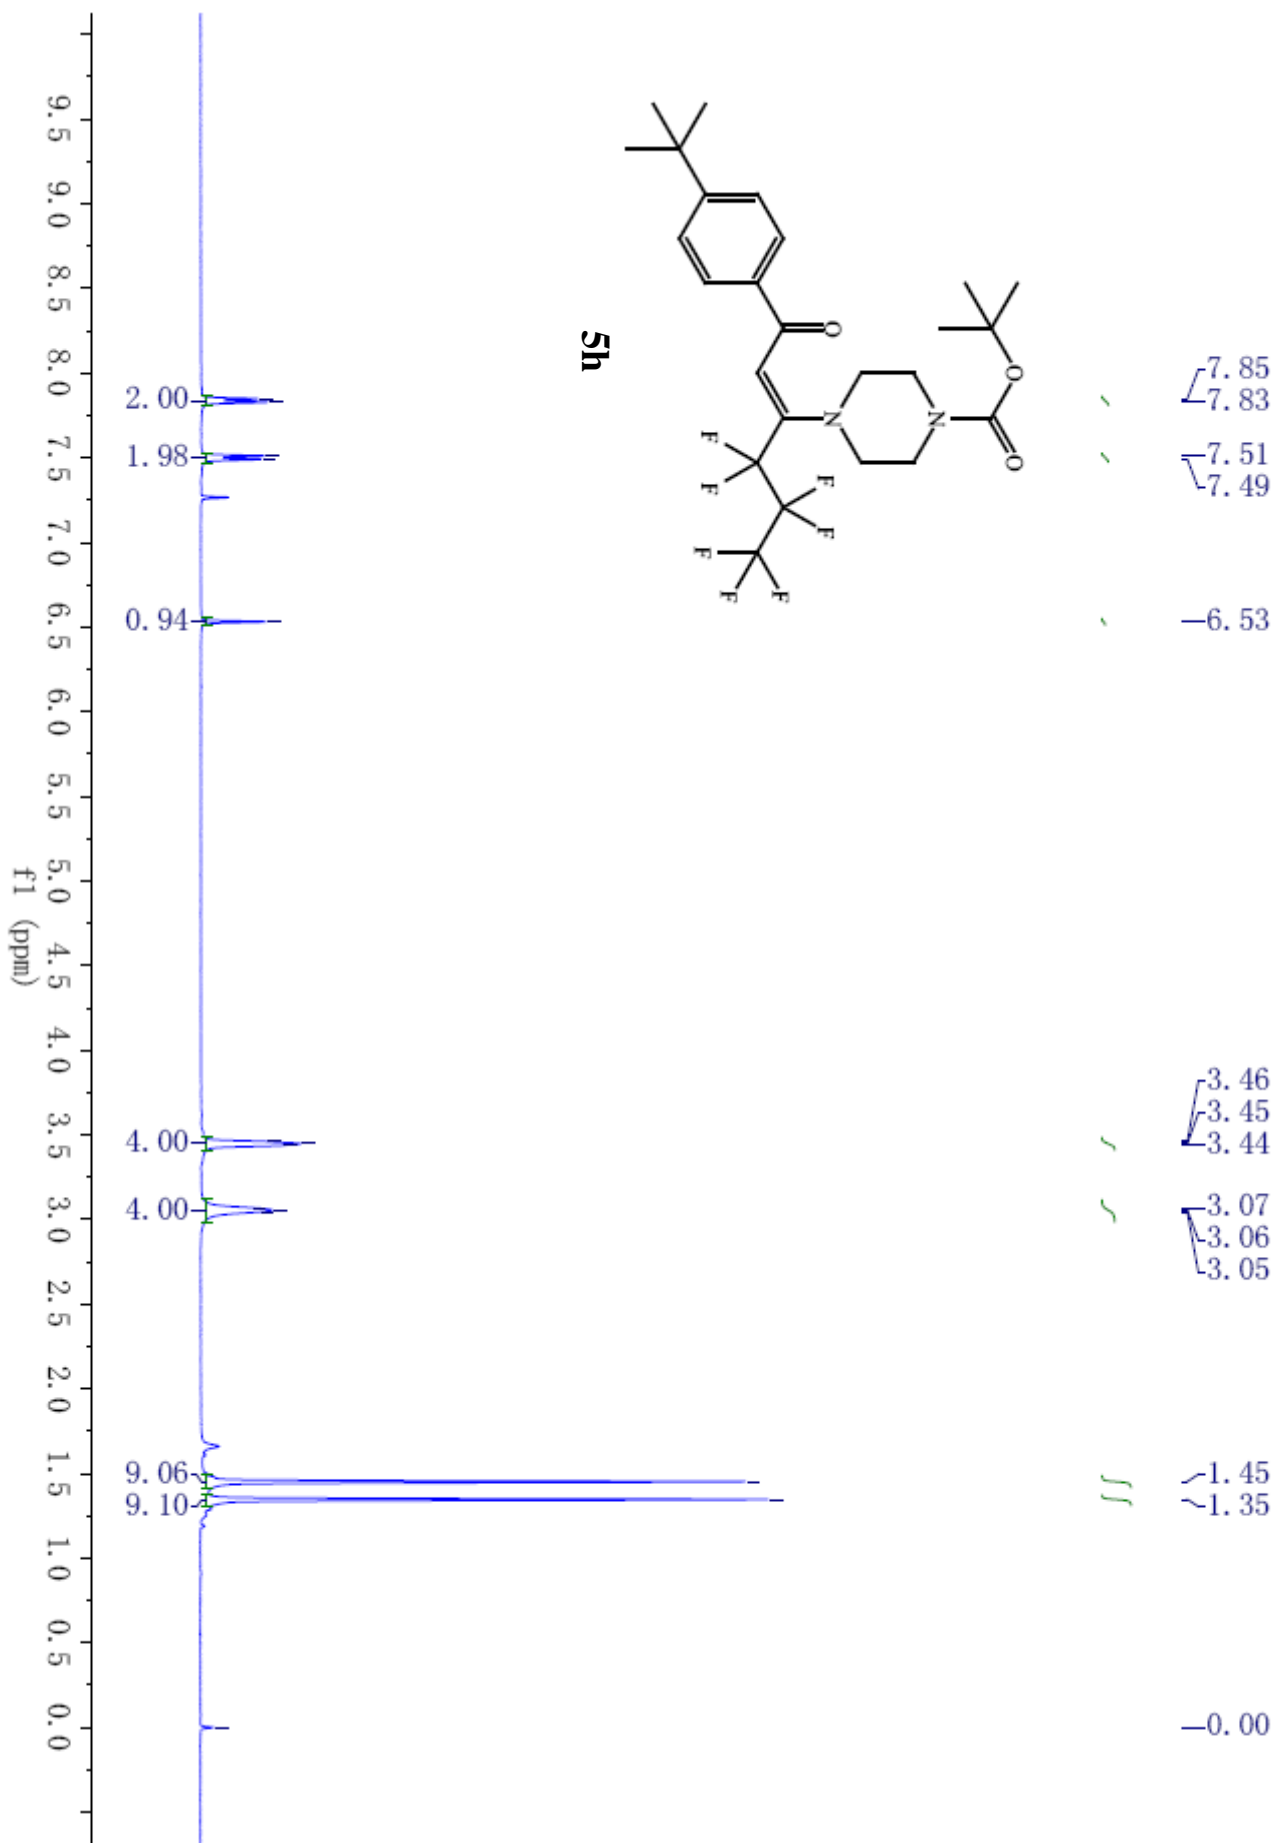

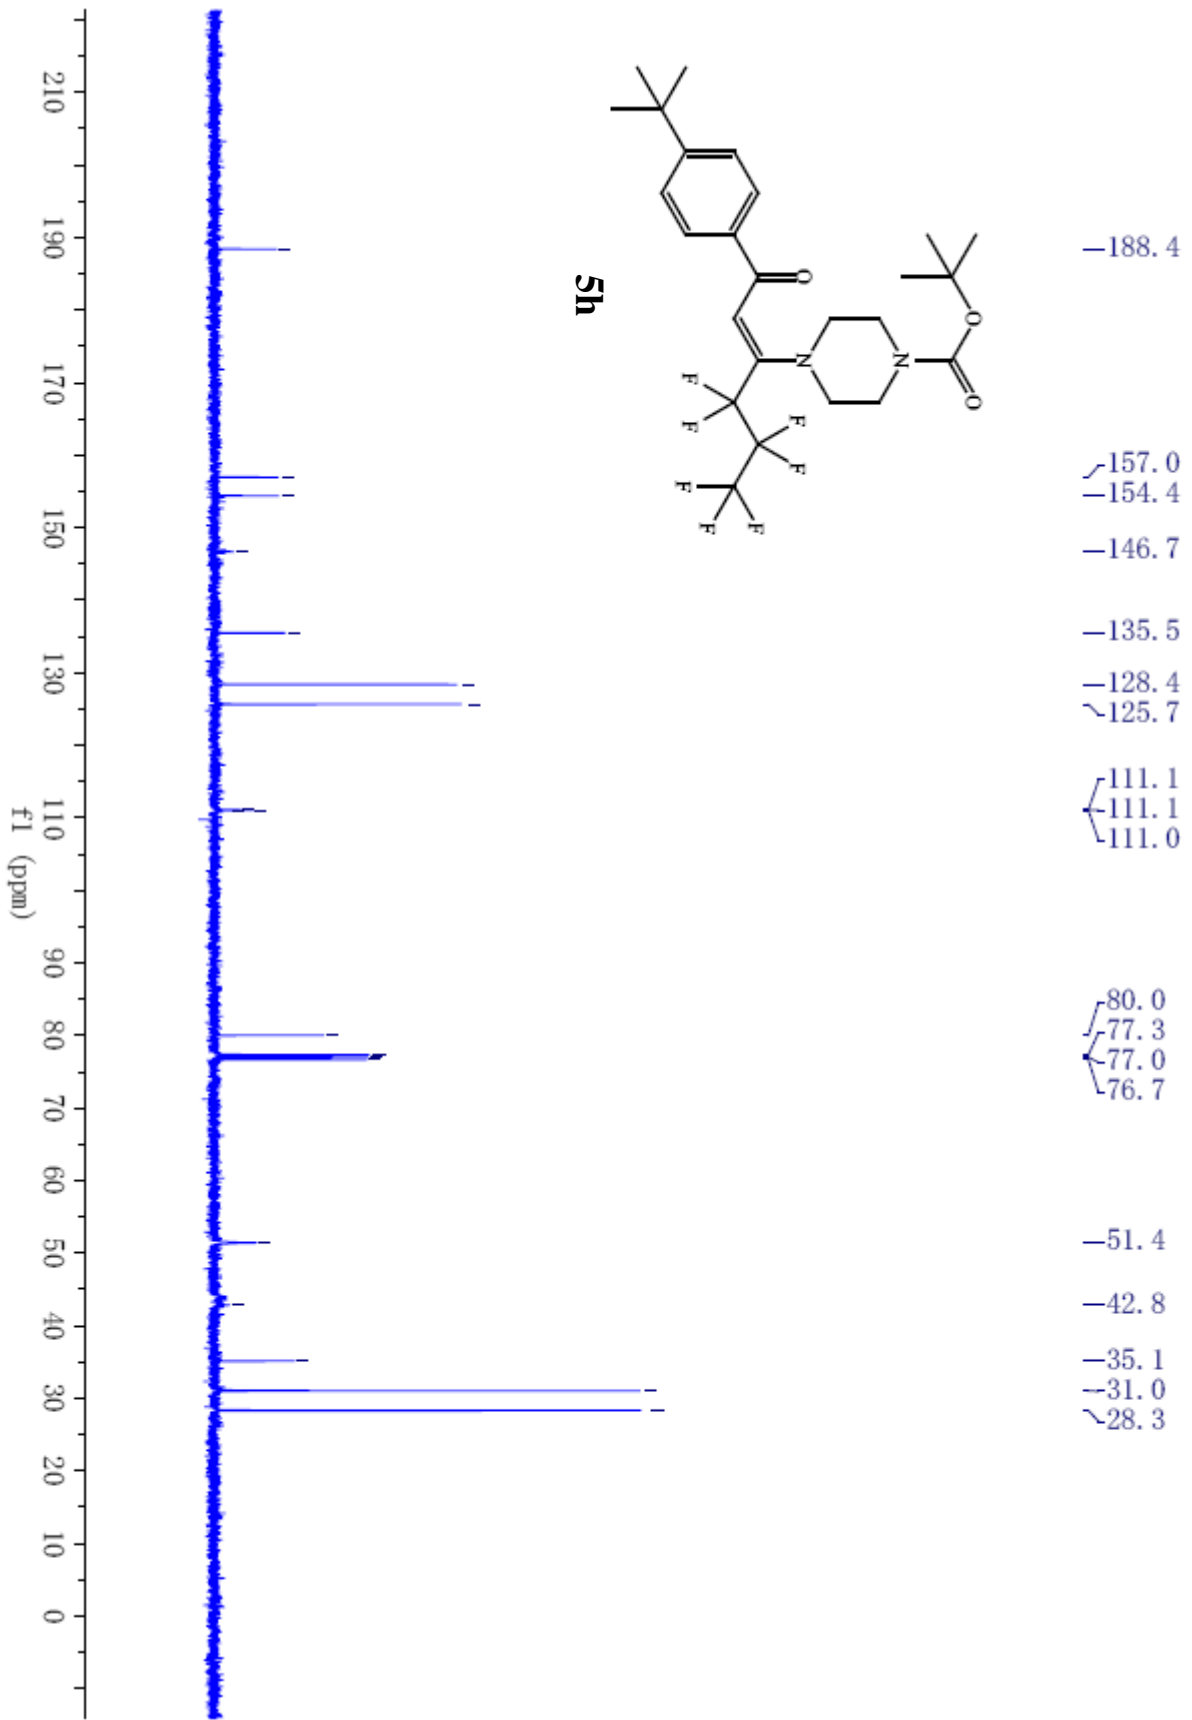

5h

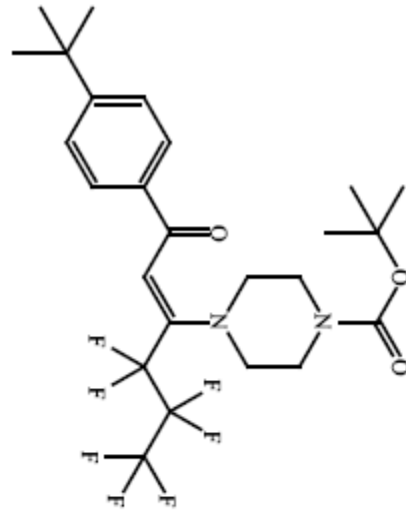

-80.31  
-80.35  
-80.38

-110.20  
-110.23  
-110.26  
-110.30

-125.34  
-125.38  
-125.42

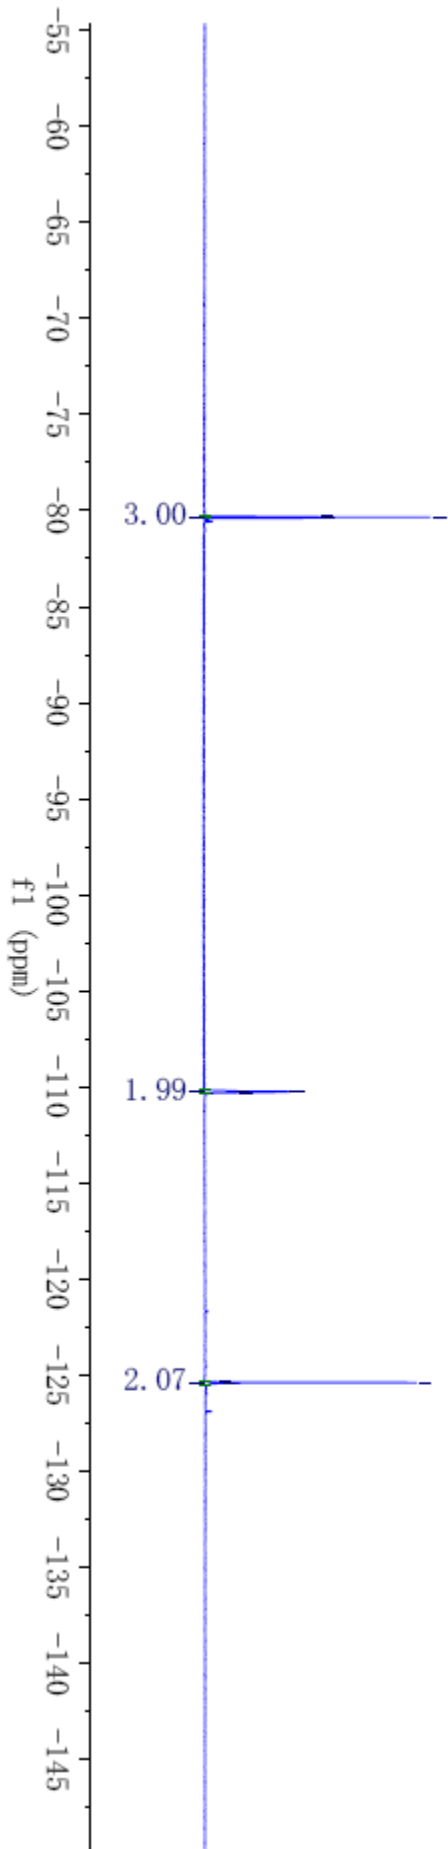



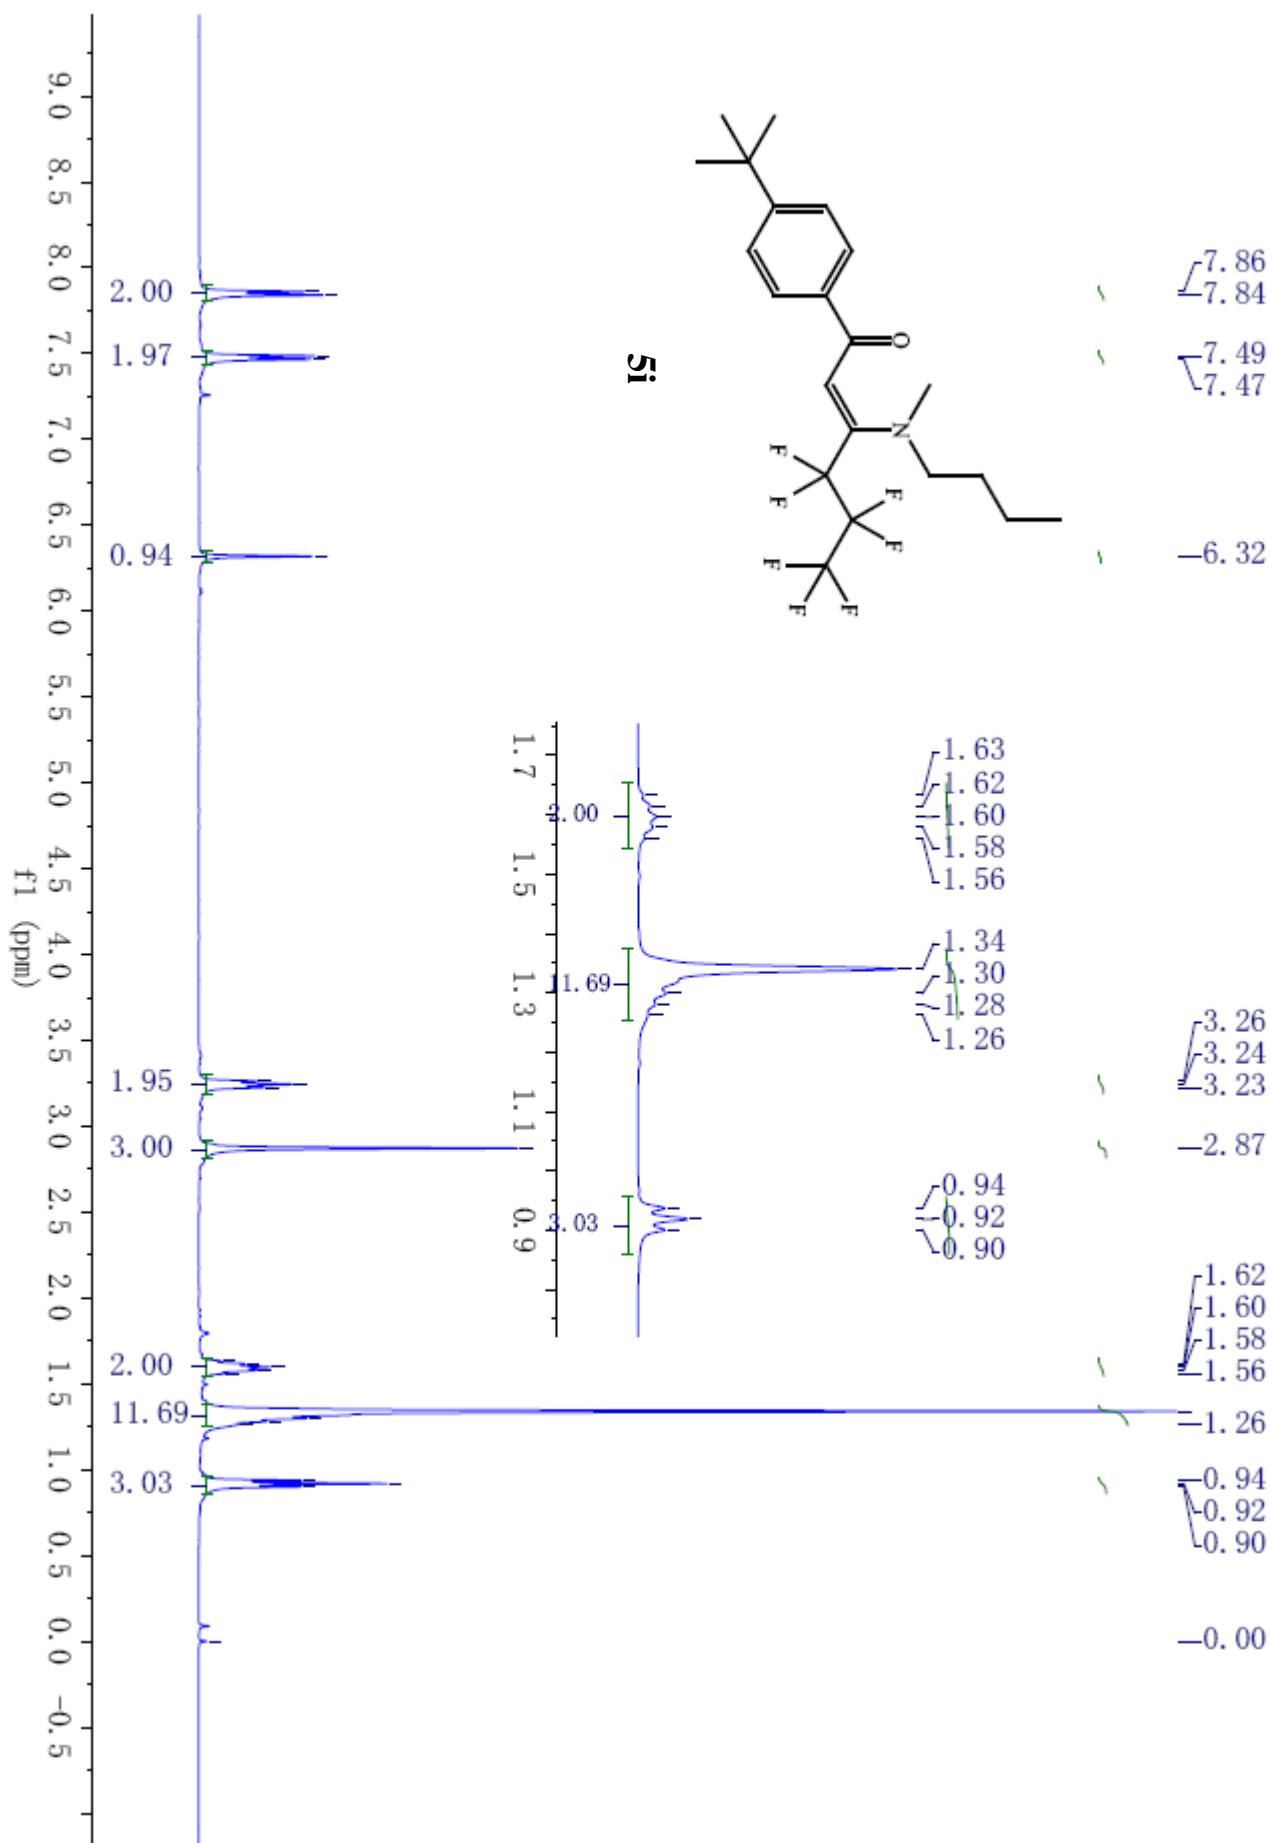

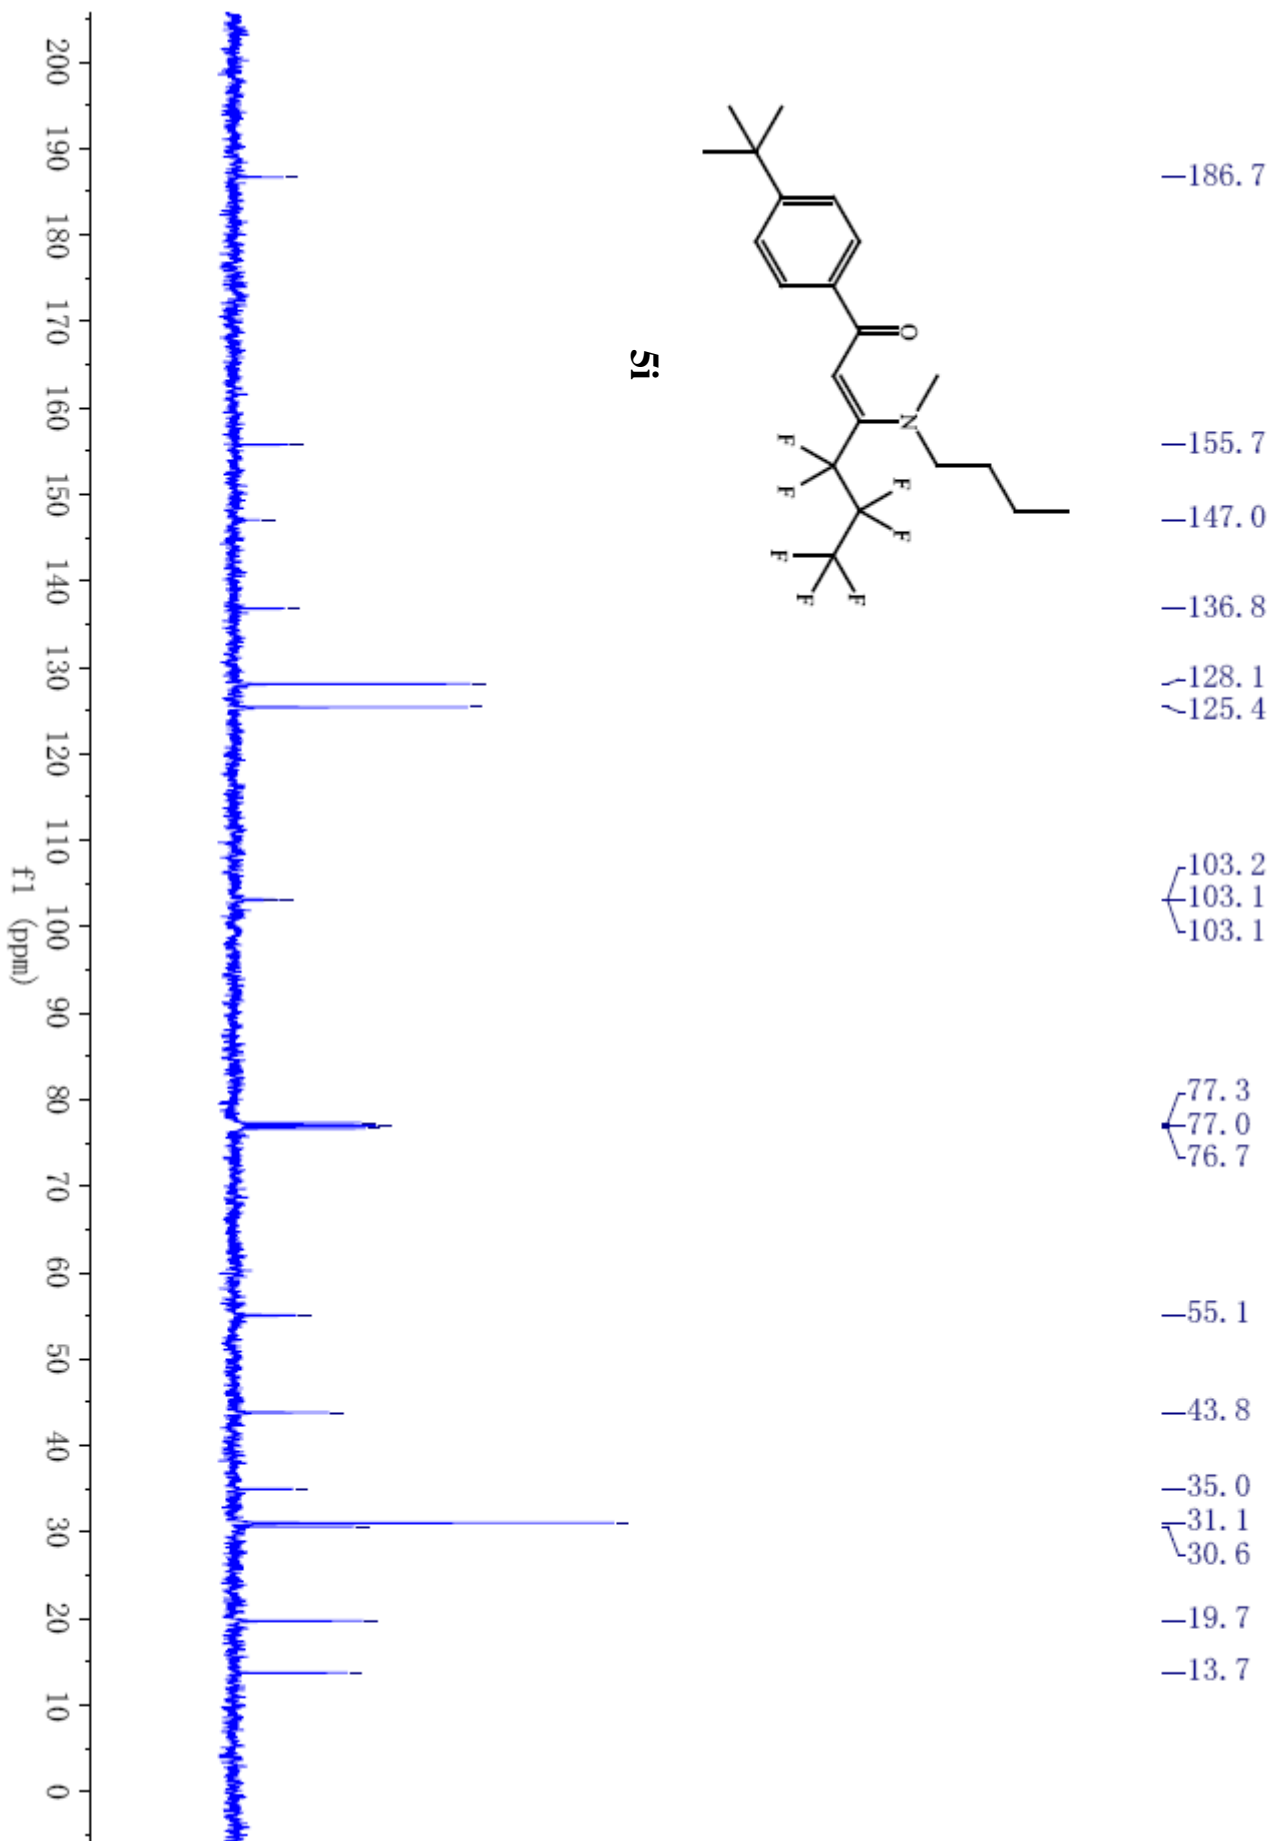

5i

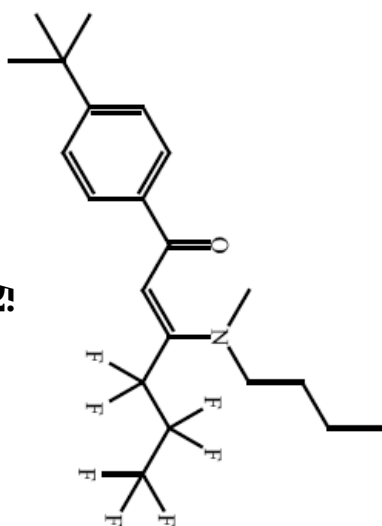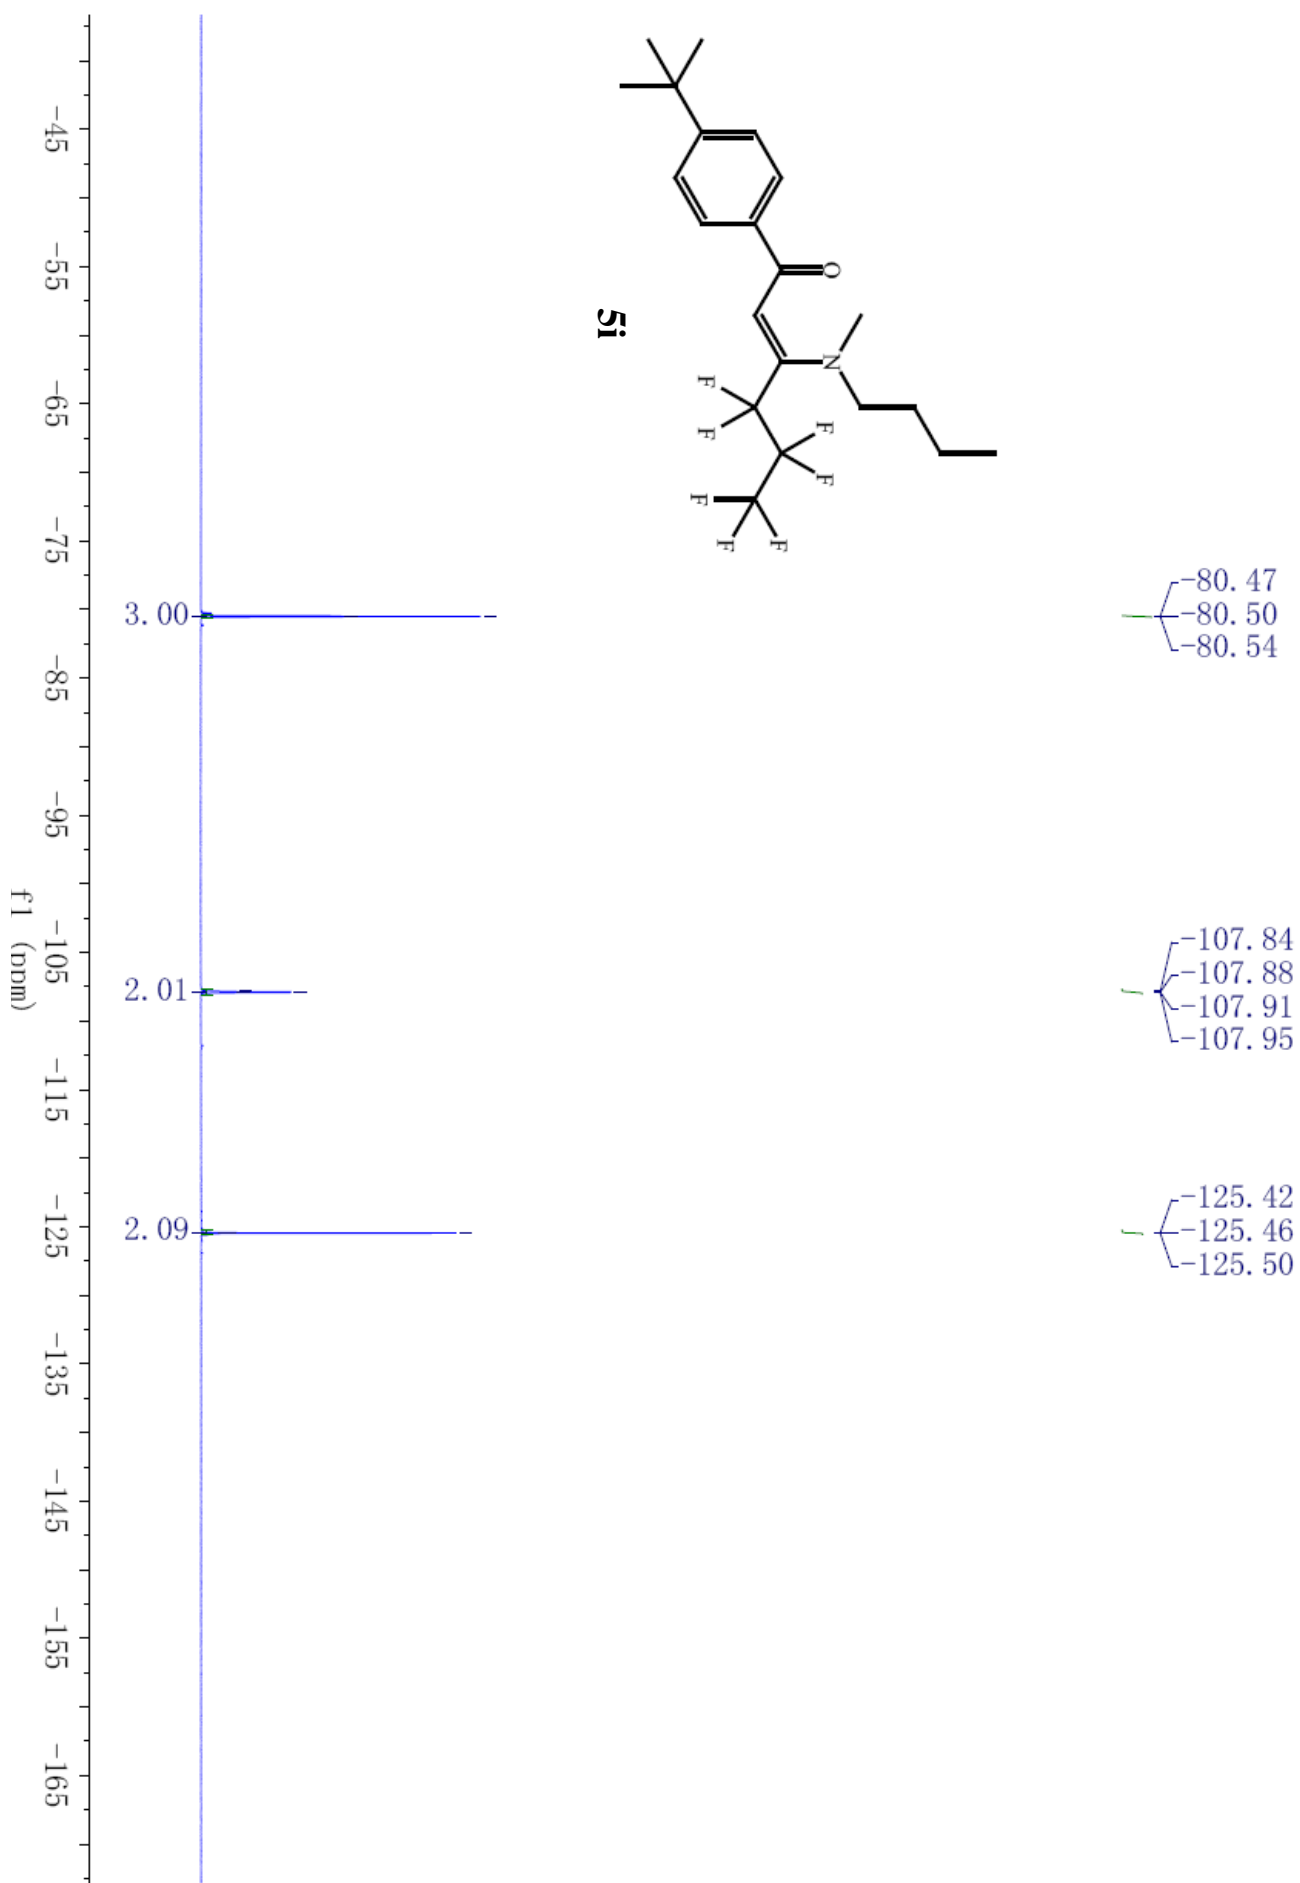

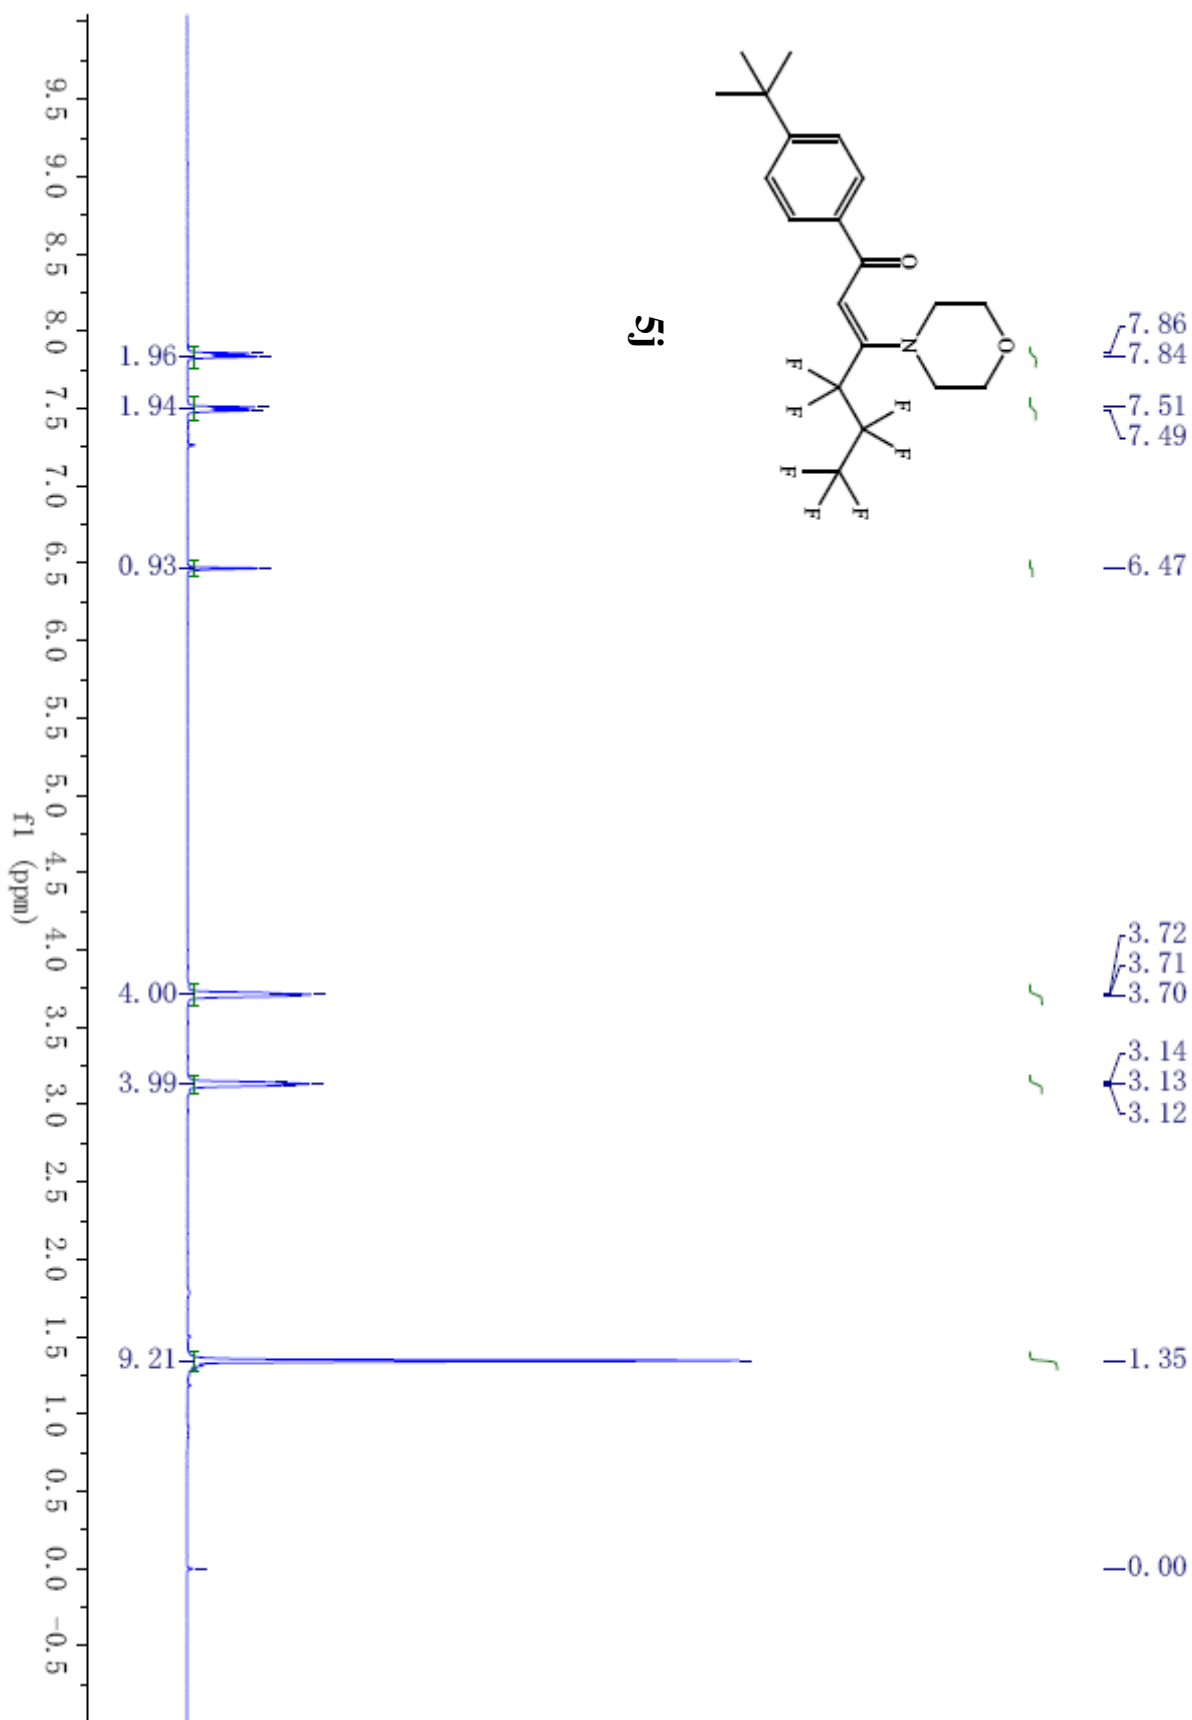

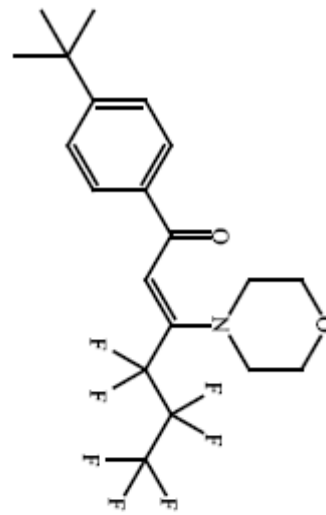

-188.2

-156.7

-146.5

-135.7

-128.3

-125.6

109.1

109.0

108.9

77.3

77.0

76.7

-66.5

-52.0

-35.1

-31.0

5j

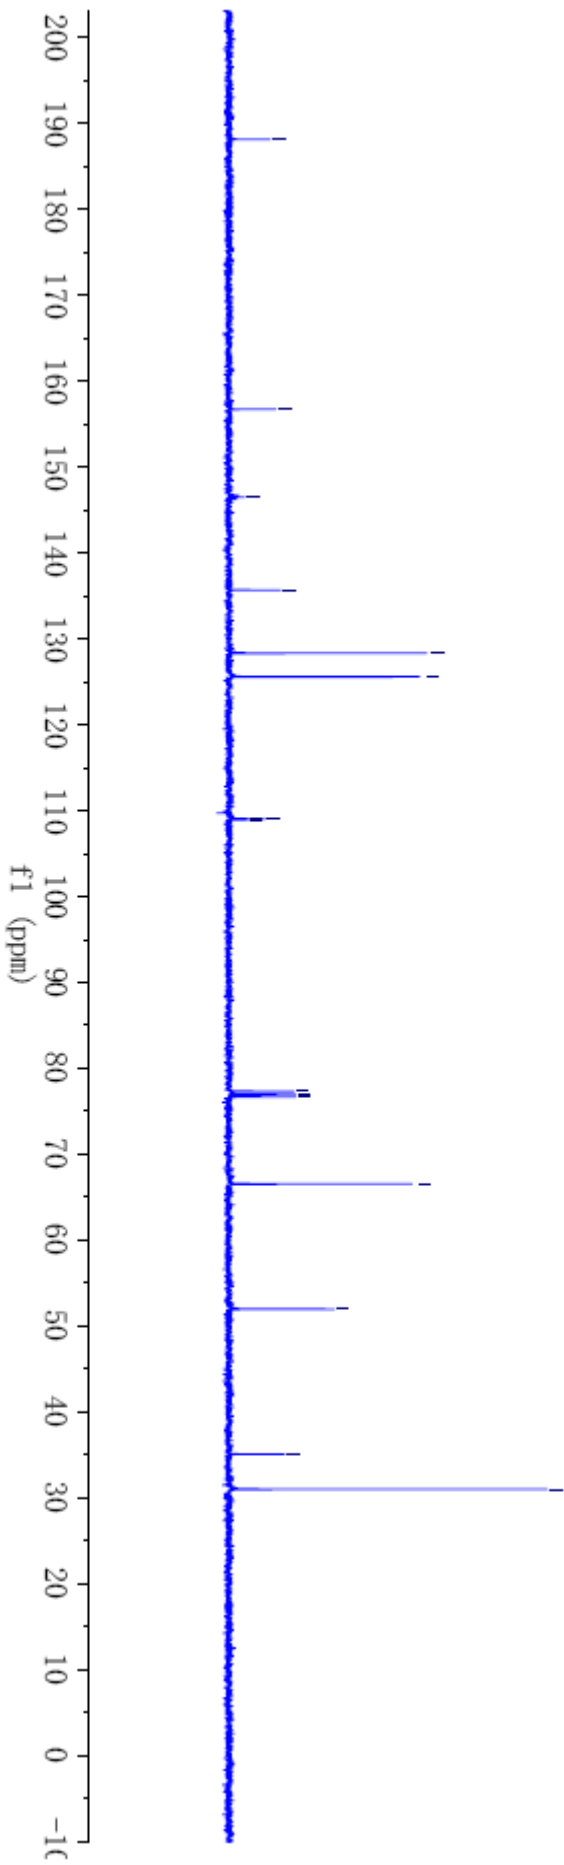

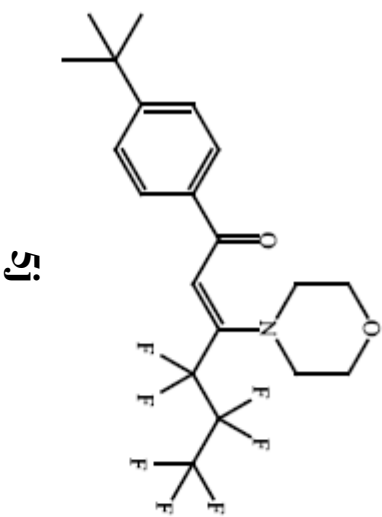

-80.35  
-80.39  
-80.42

109.54  
109.57  
109.60  
109.64

125.27  
125.31  
125.35

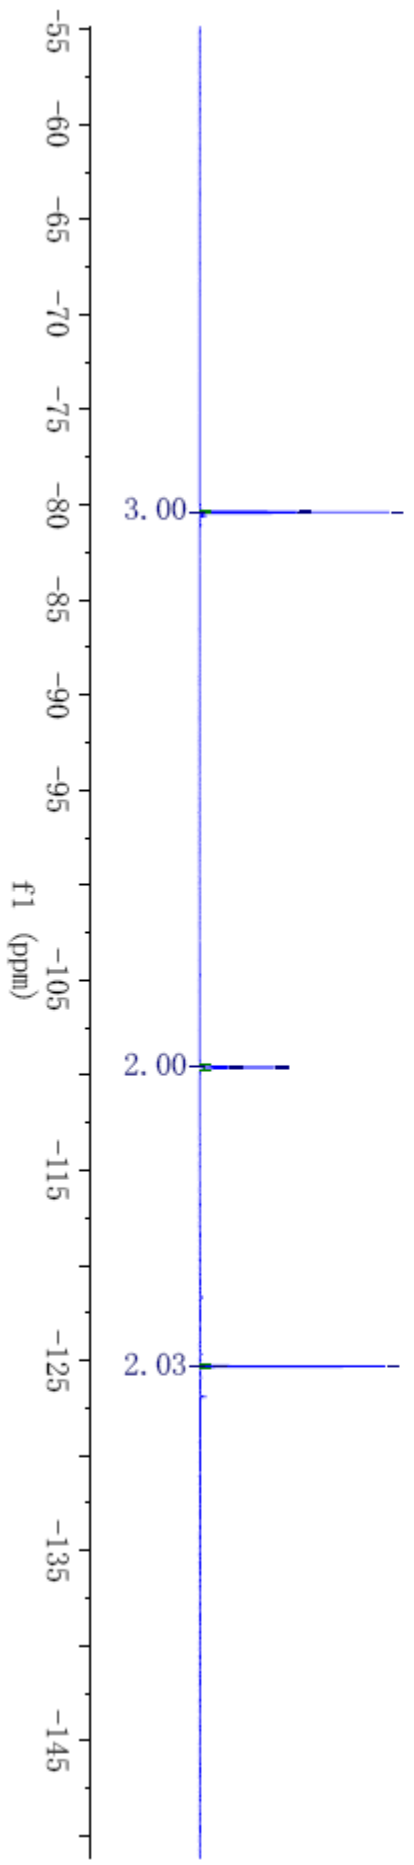

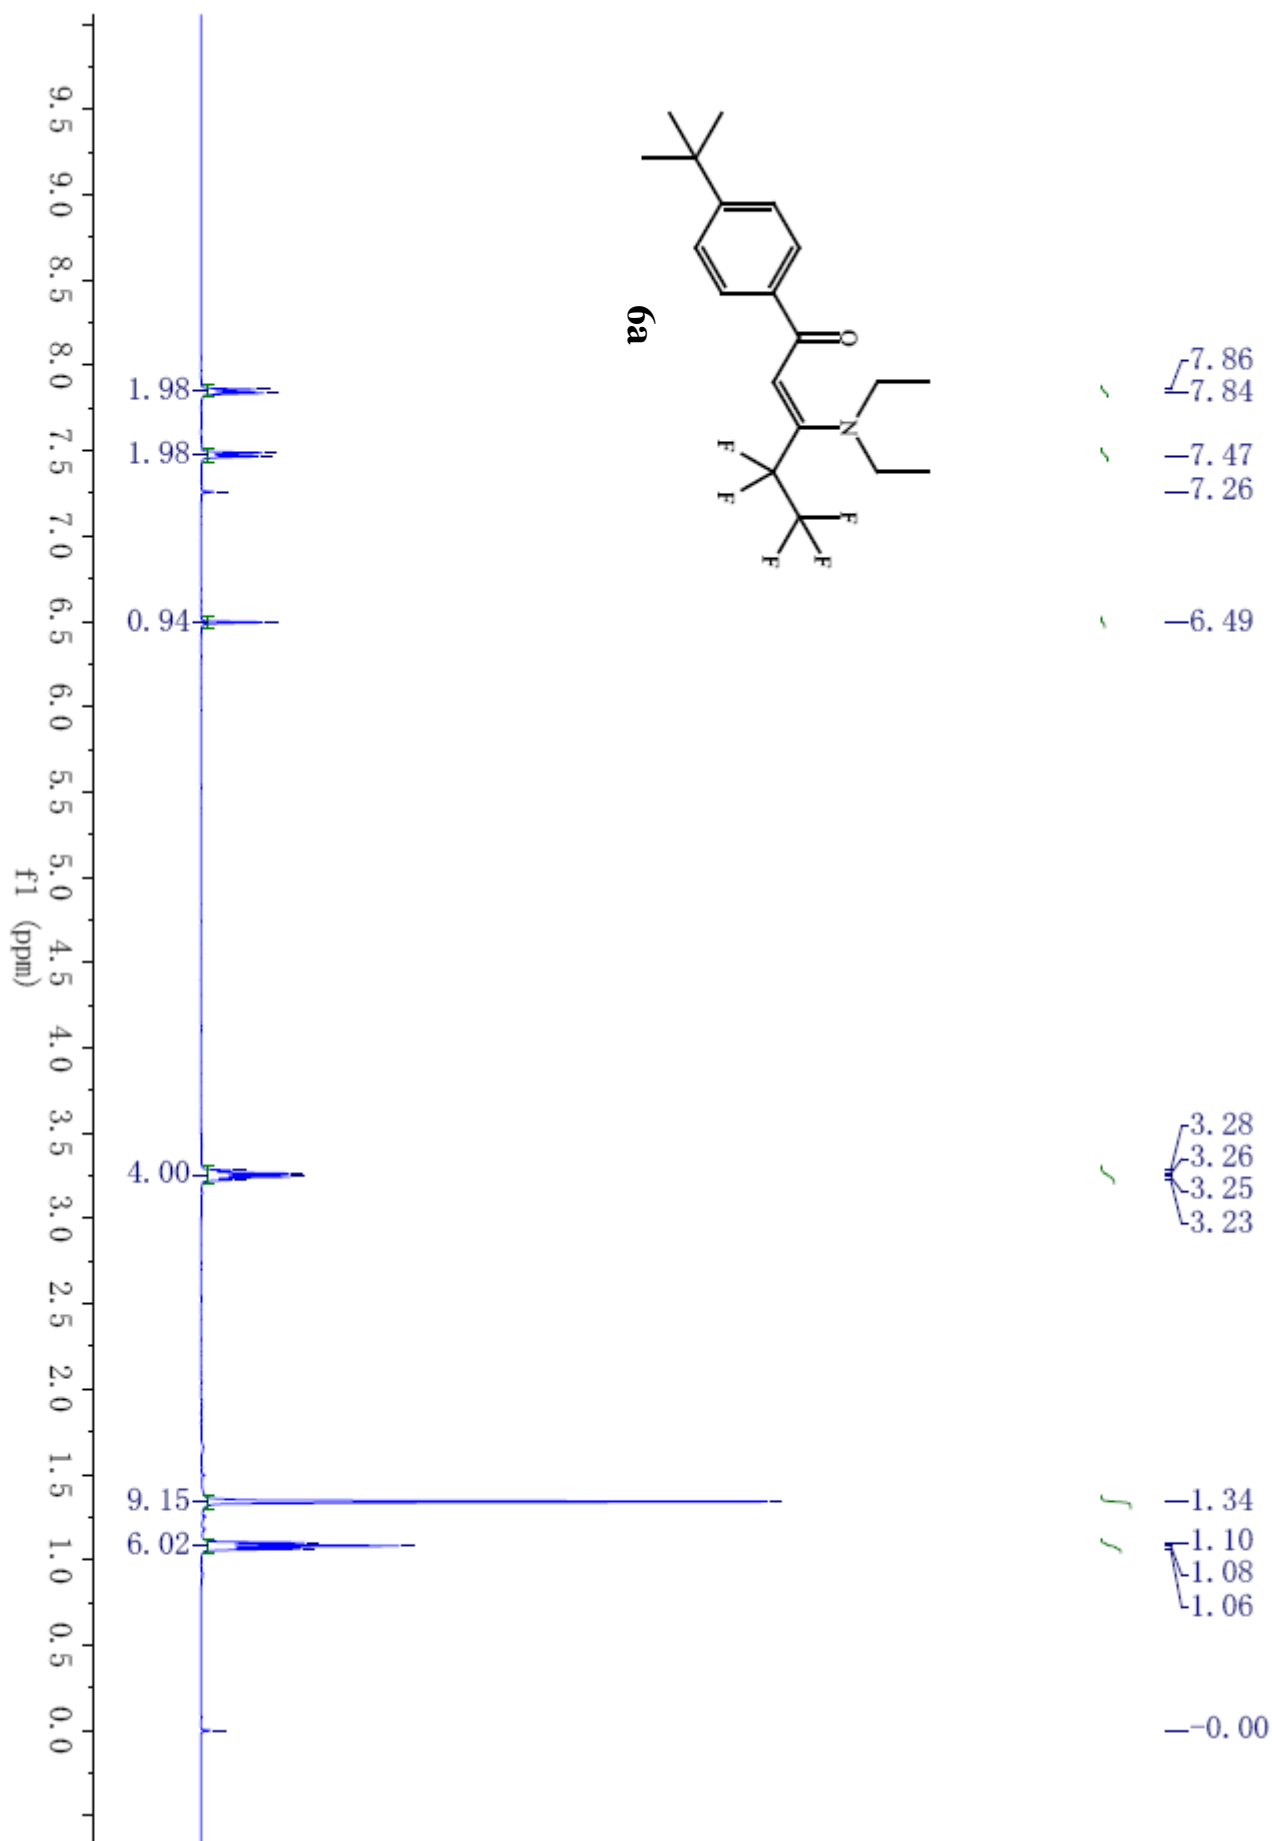

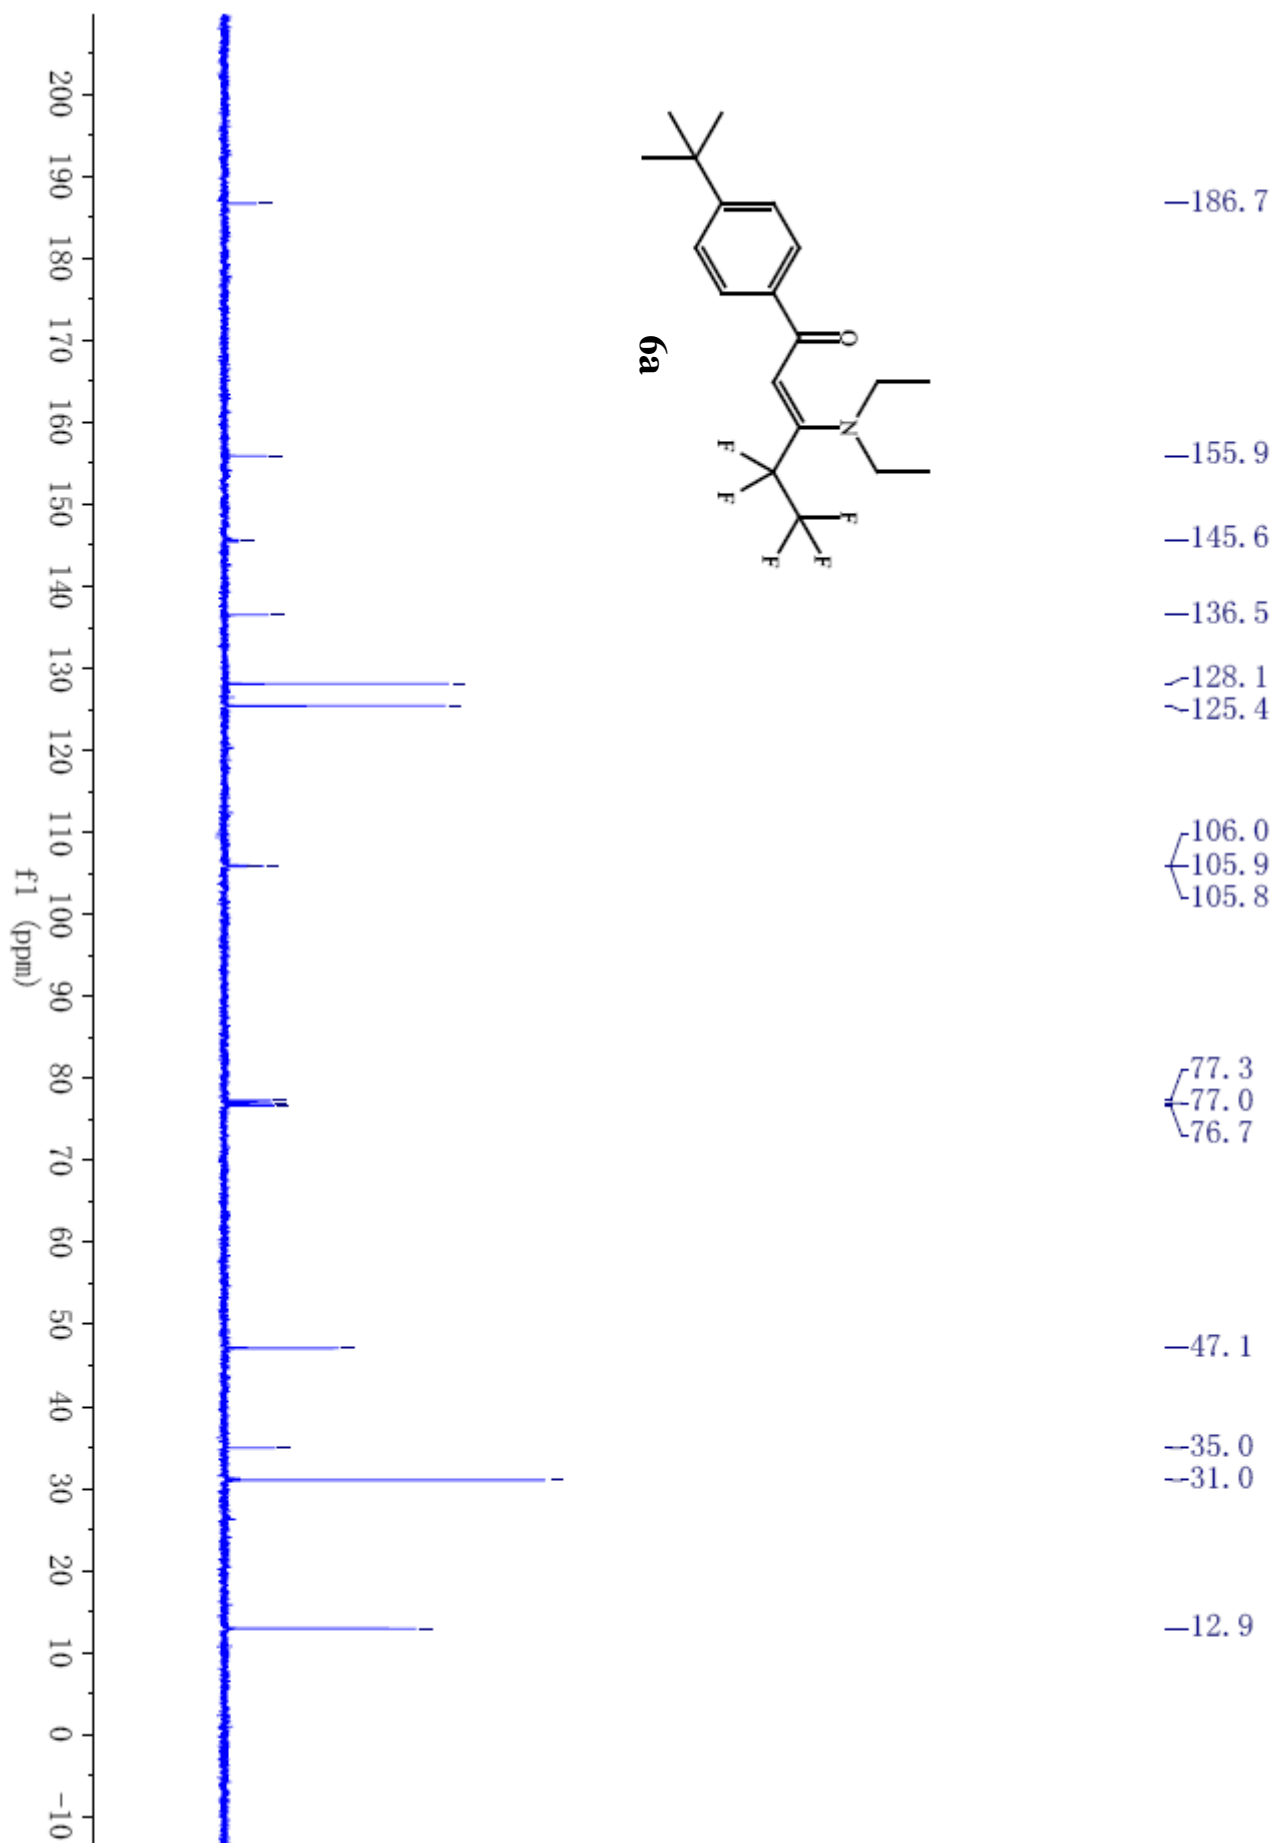



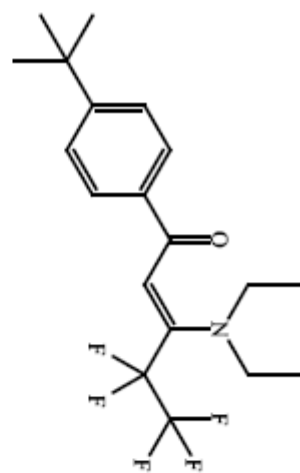

**6a**

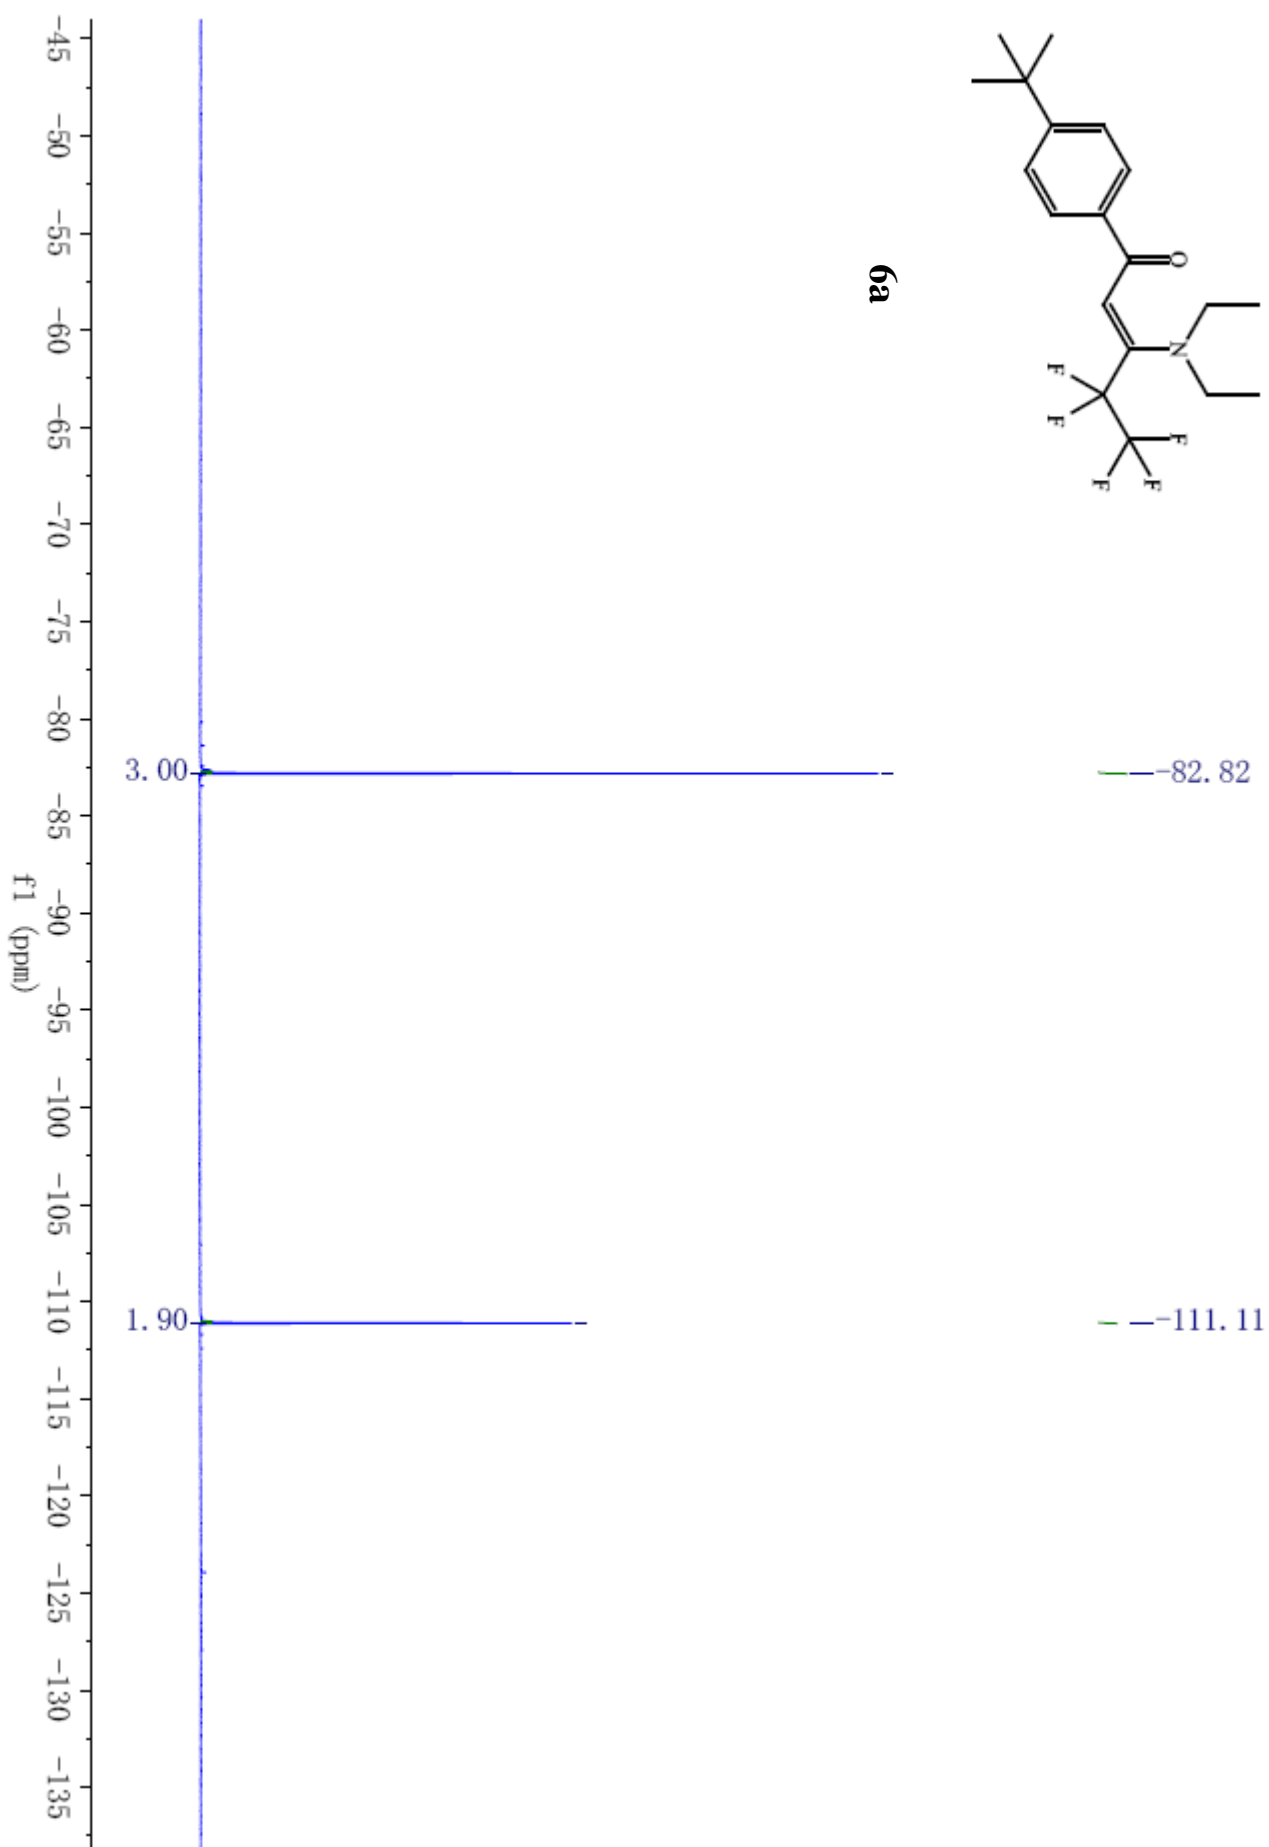

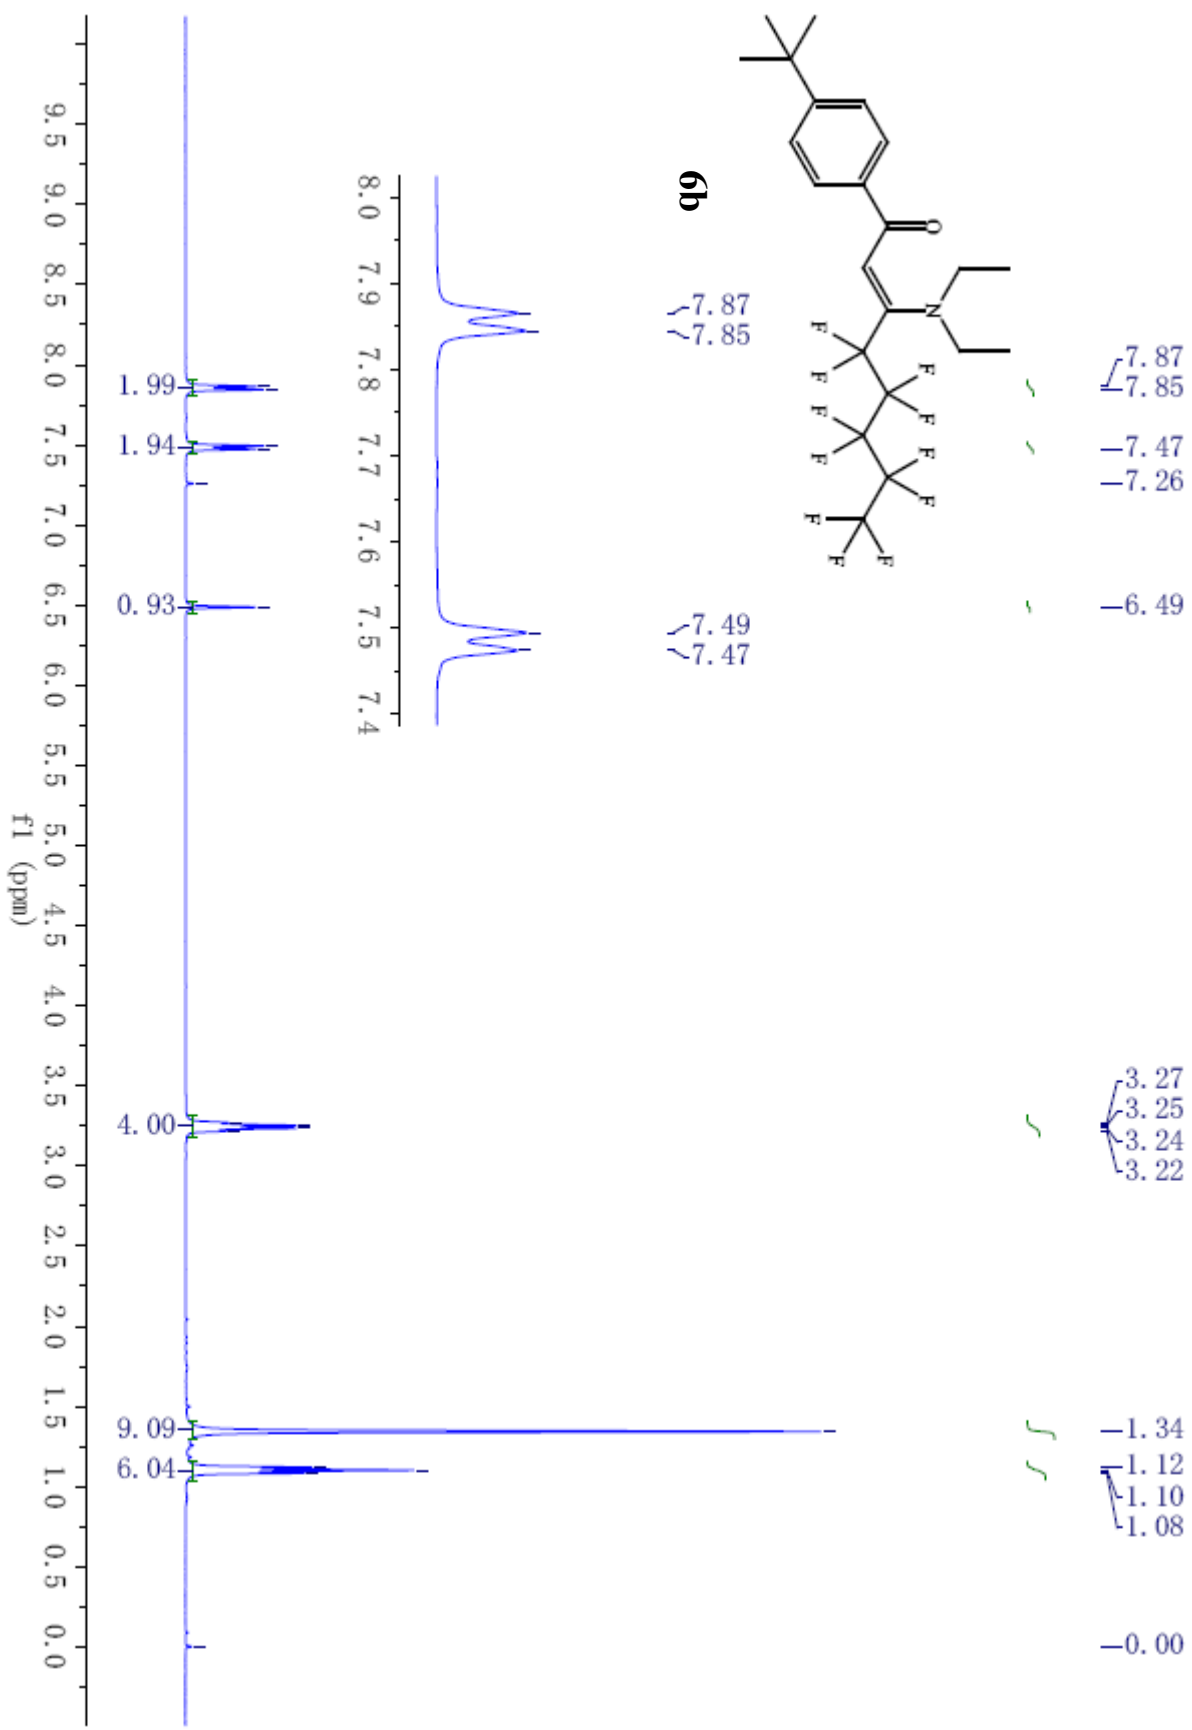

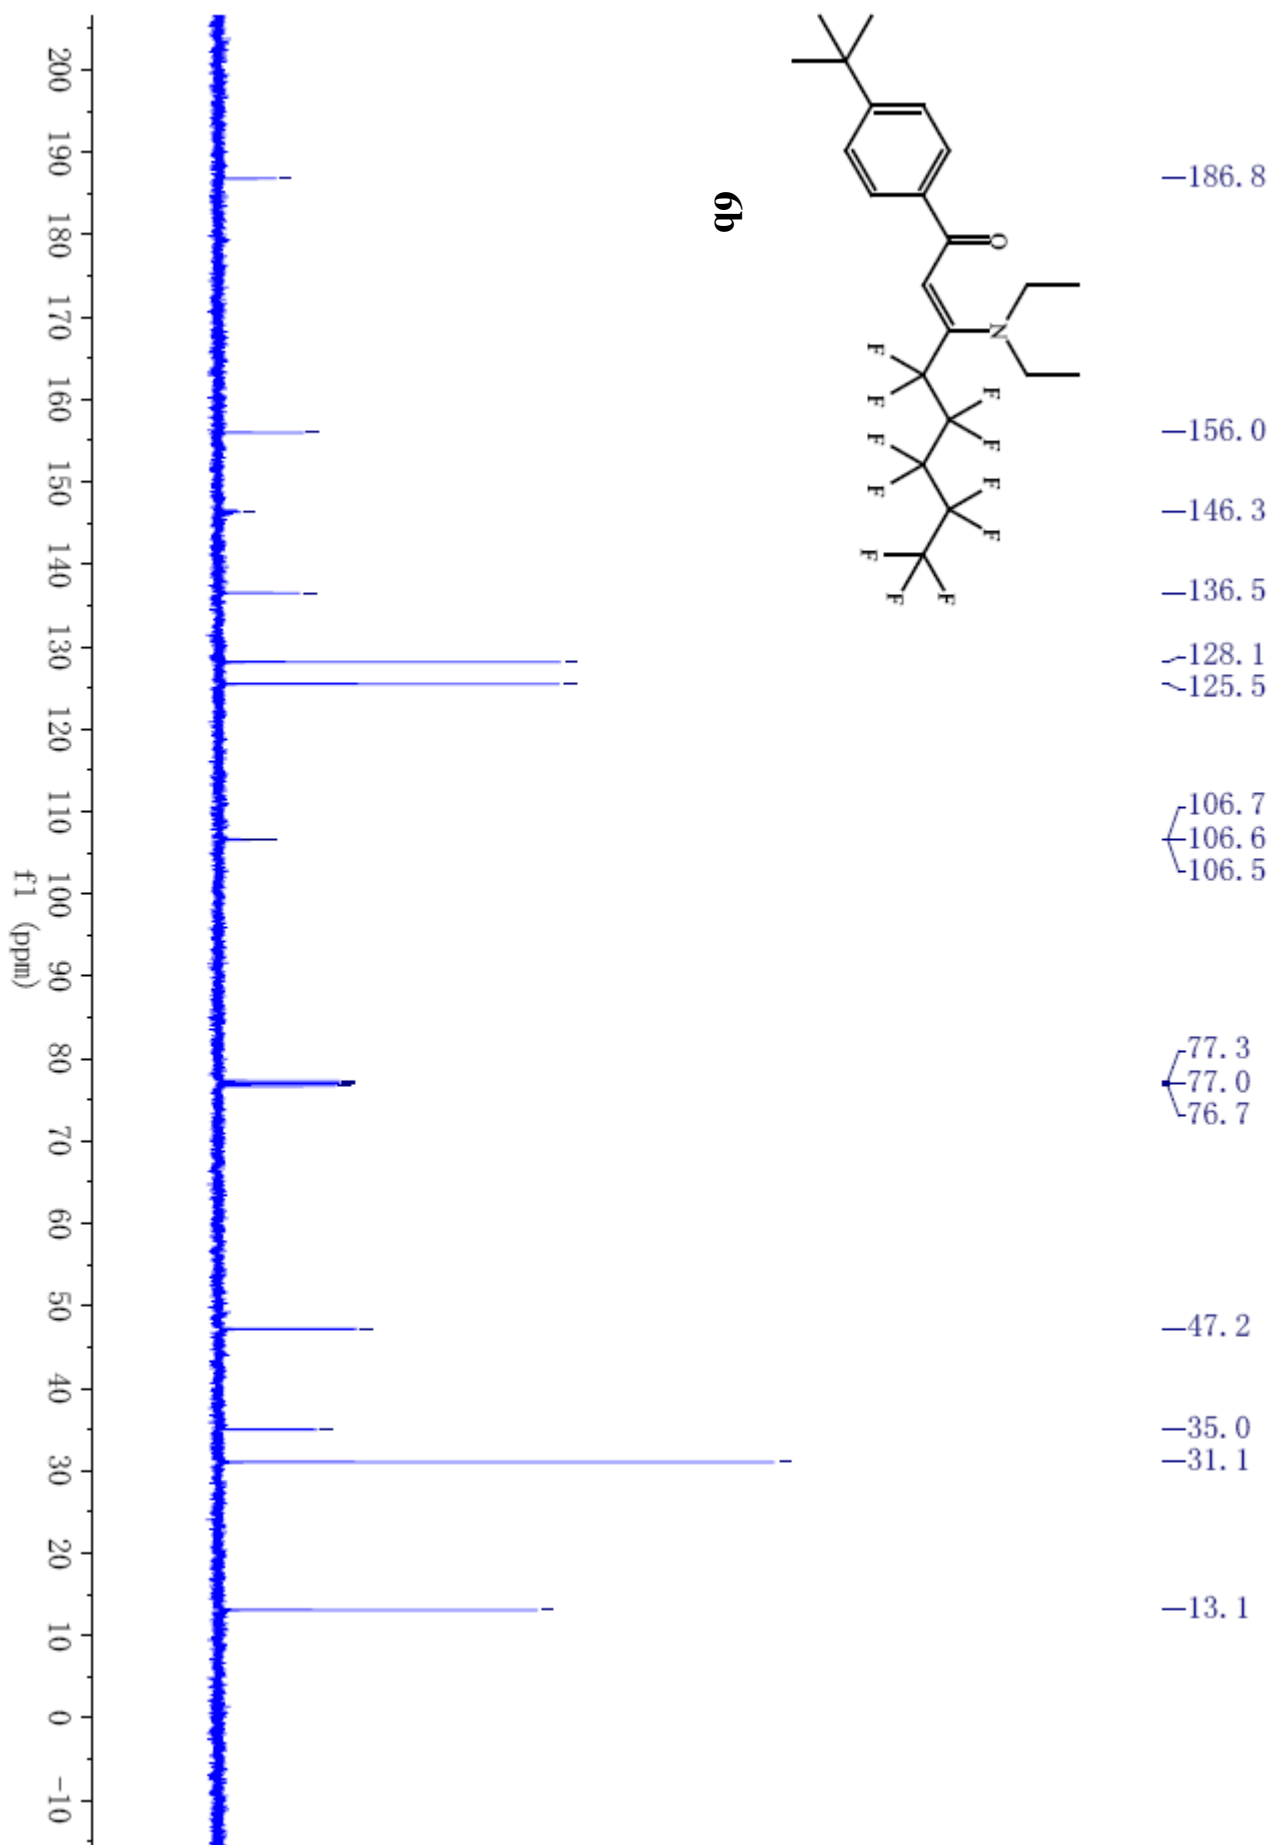

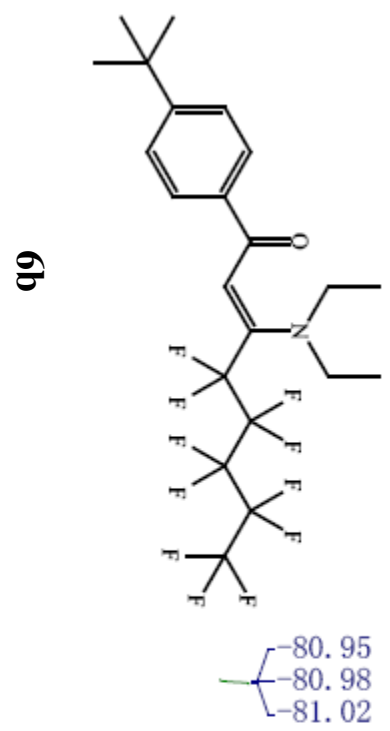

80.95  
80.98  
81.02

107.61  
107.67  
107.72

121.28  
121.32  
121.36  
122.61  
122.67  
122.71  
126.24  
126.25  
126.29  
126.33  
126.34

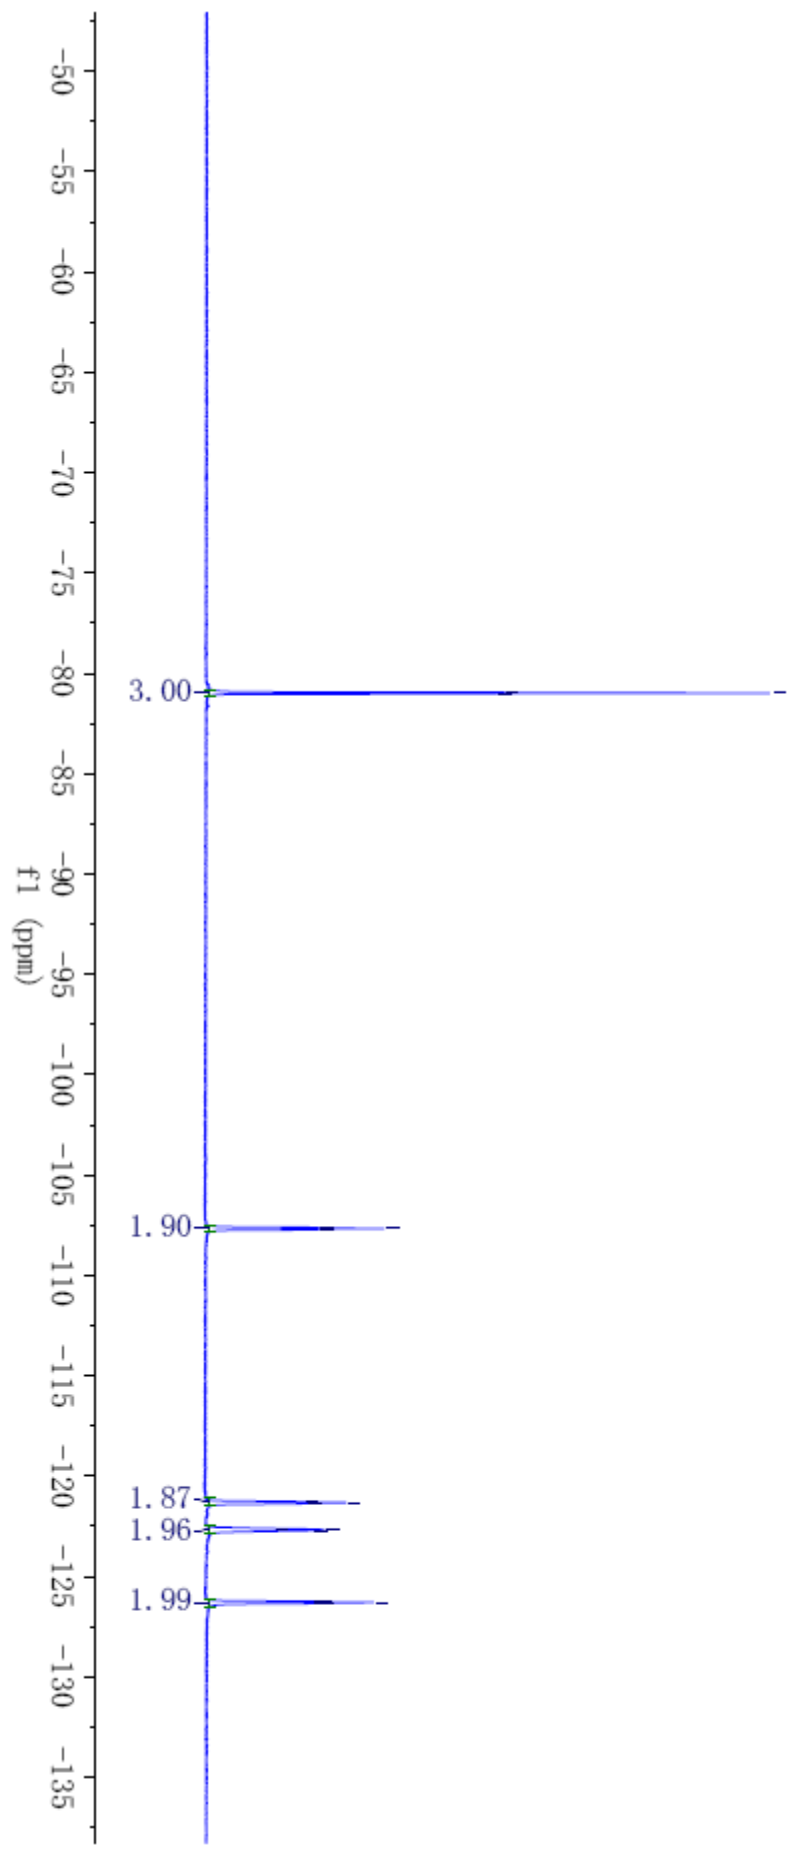

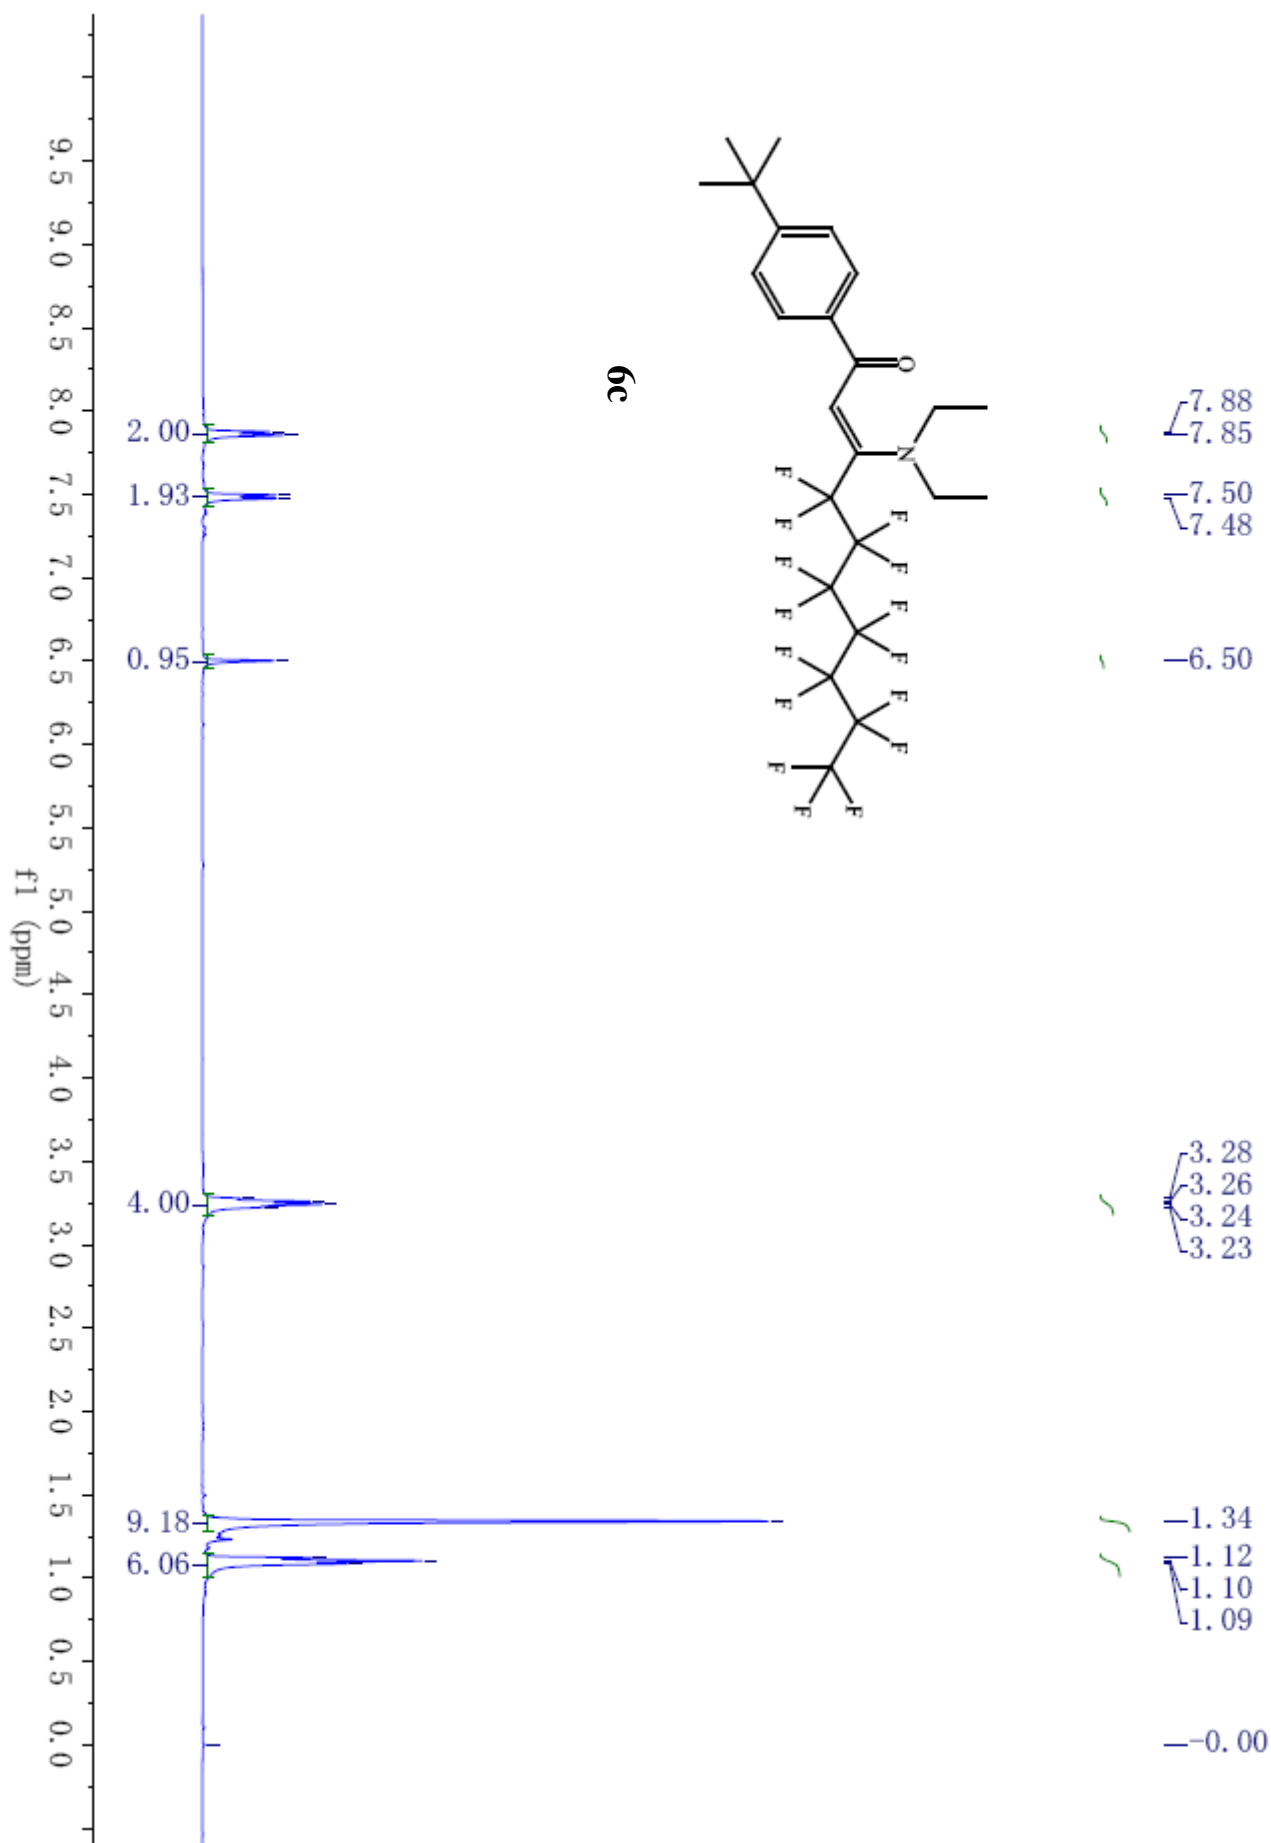

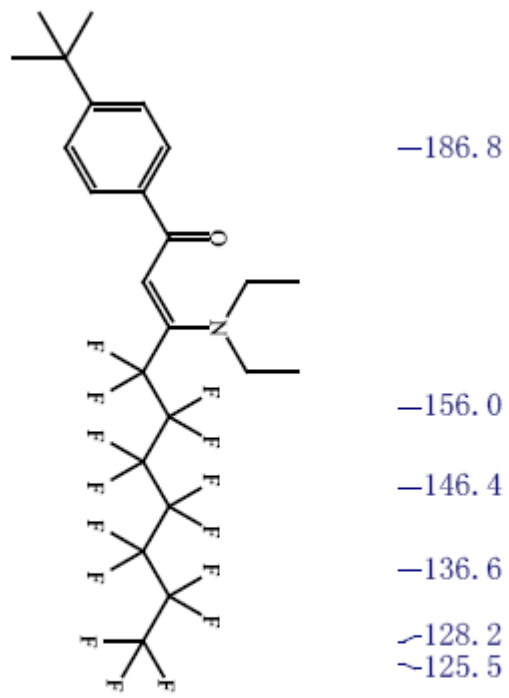

- 186.8
- 156.0
- 146.4
- 136.6
- 128.2
- 125.5
- 106.8
- 106.7
- 106.7
- 77.3
- 77.0
- 76.7
- 47.2
- 35.0
- 31.0
- 13.0

**6c**

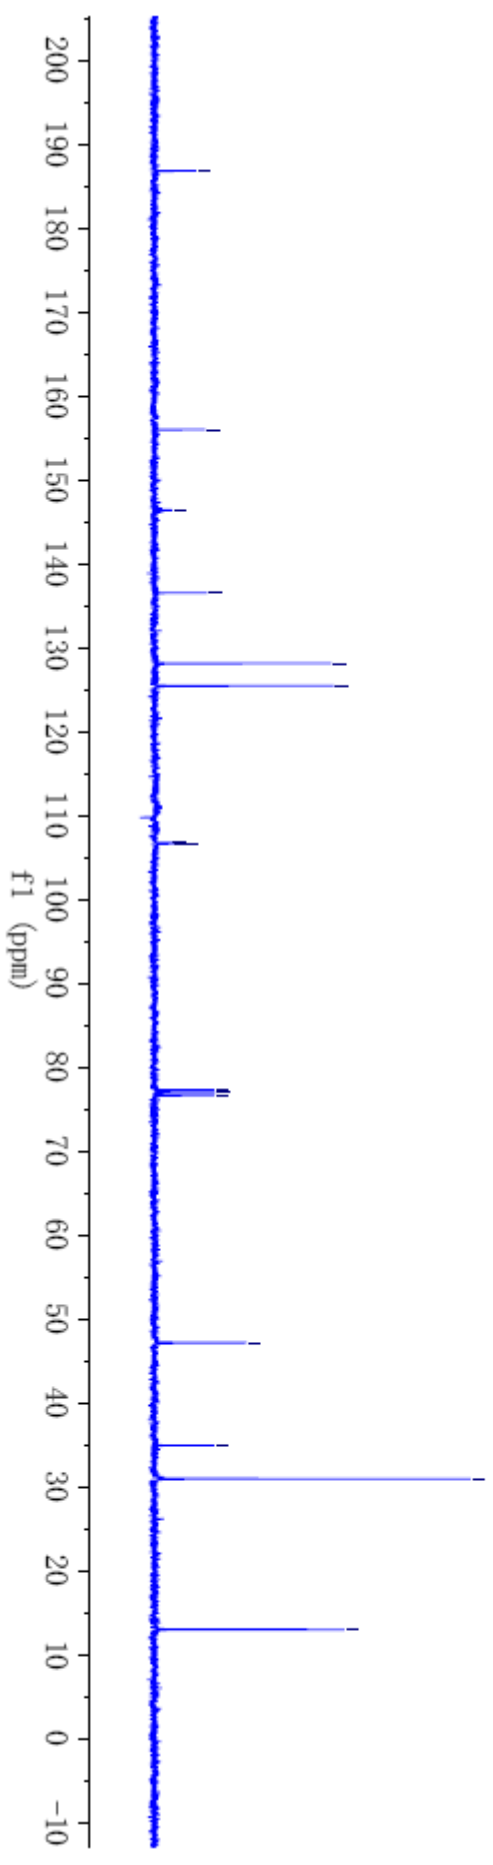

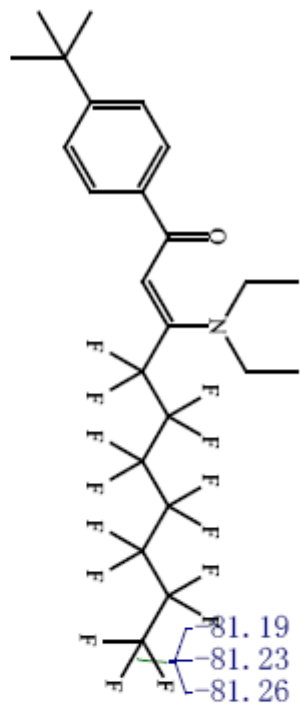

**6c**

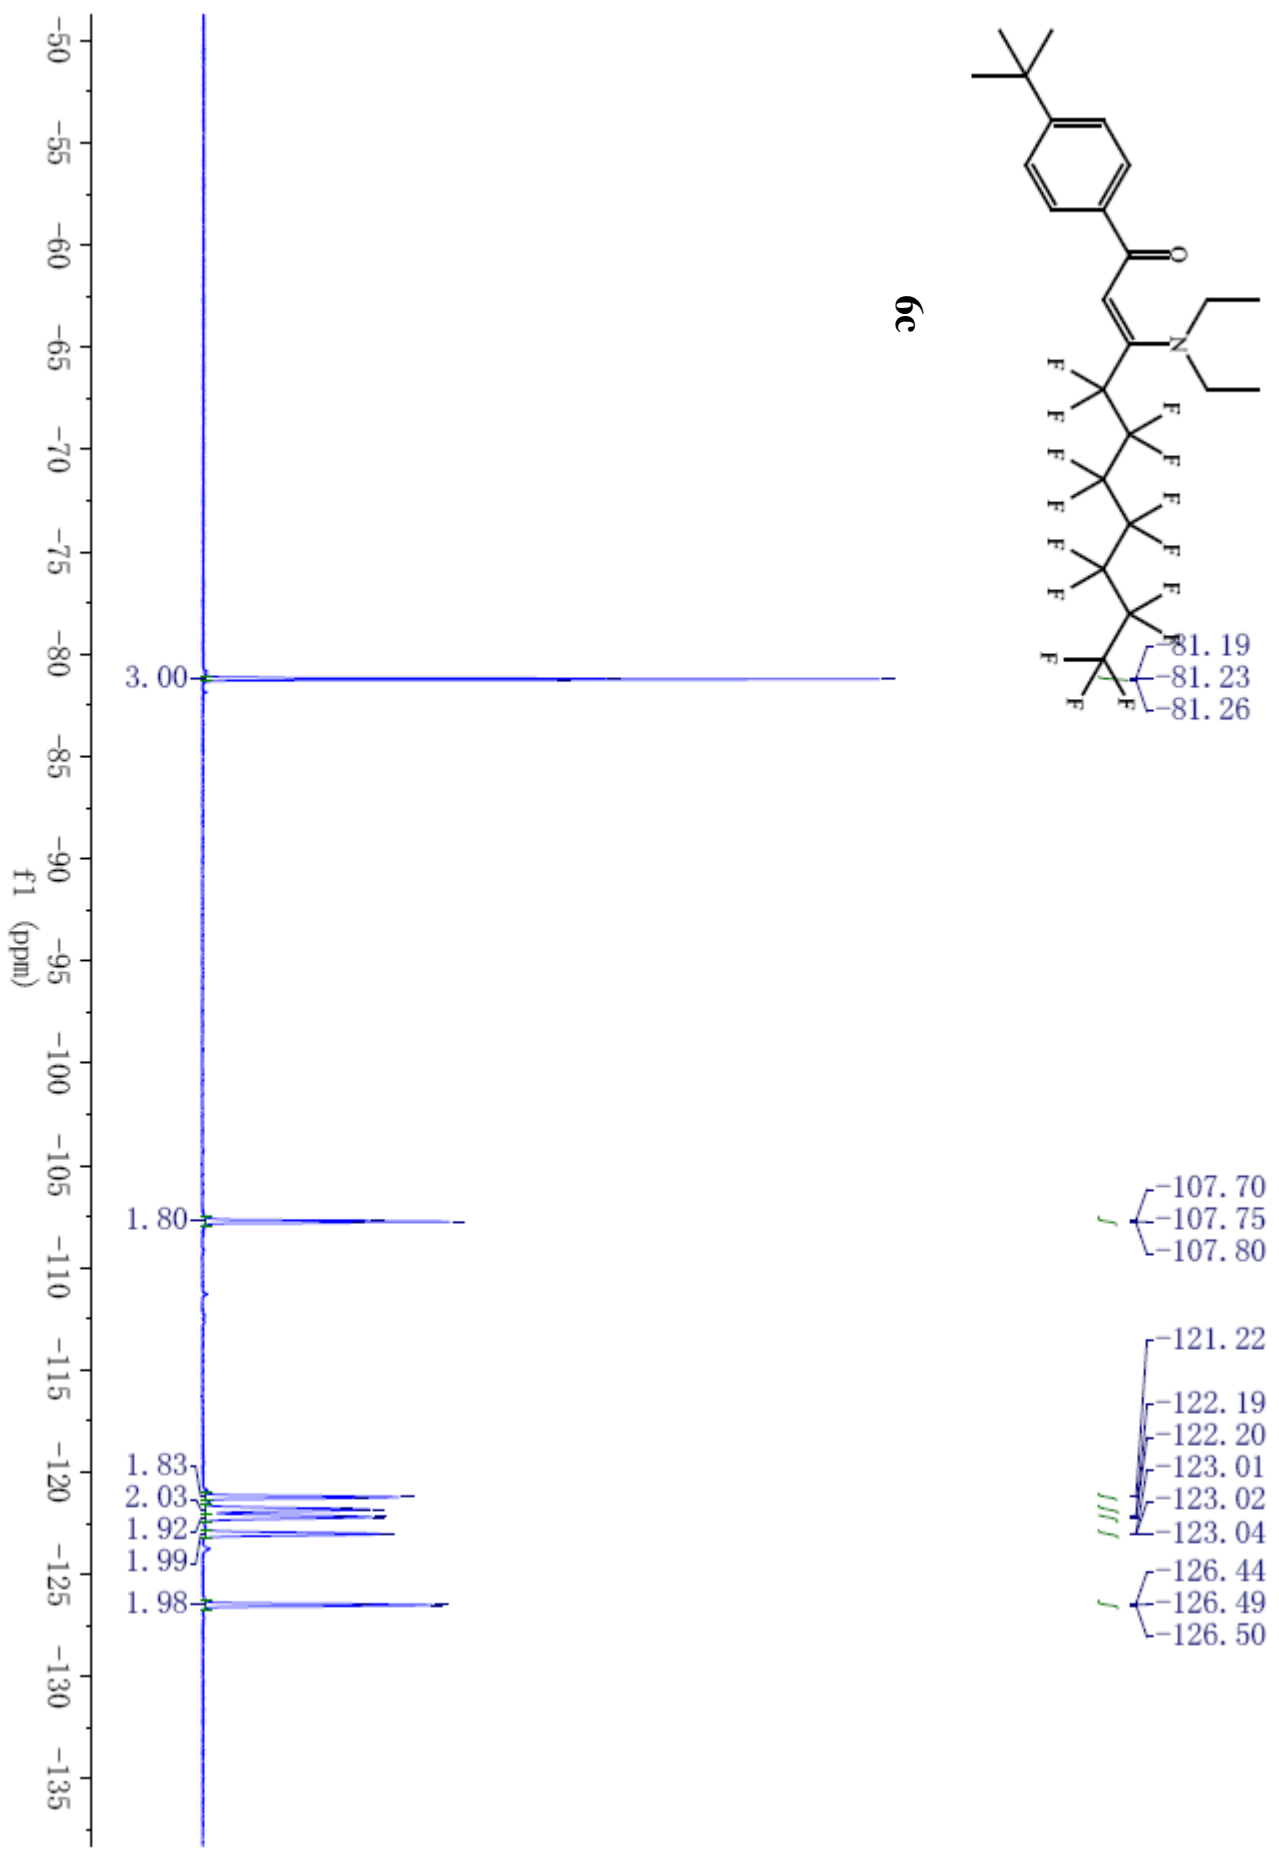

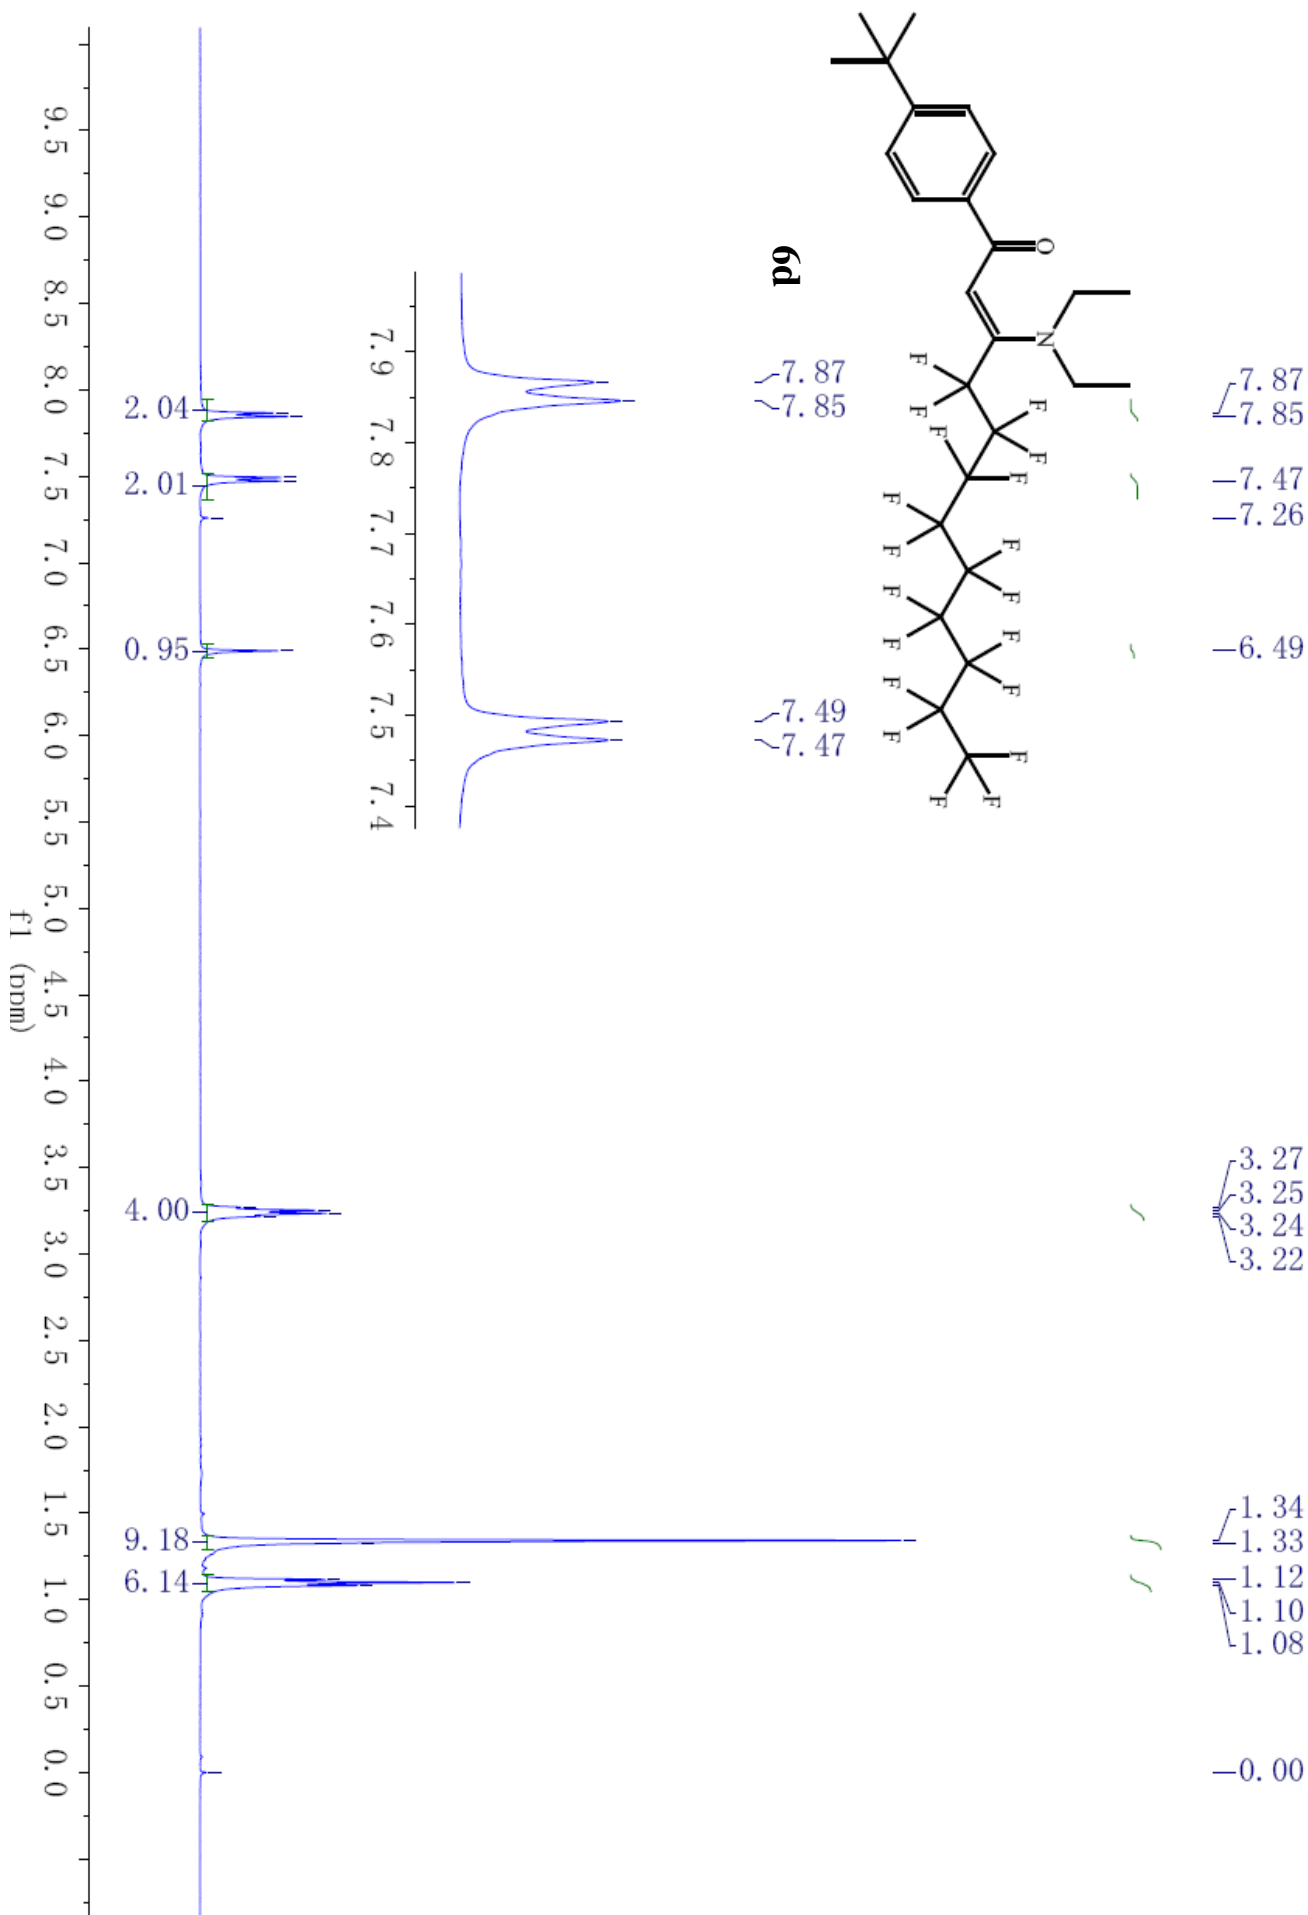



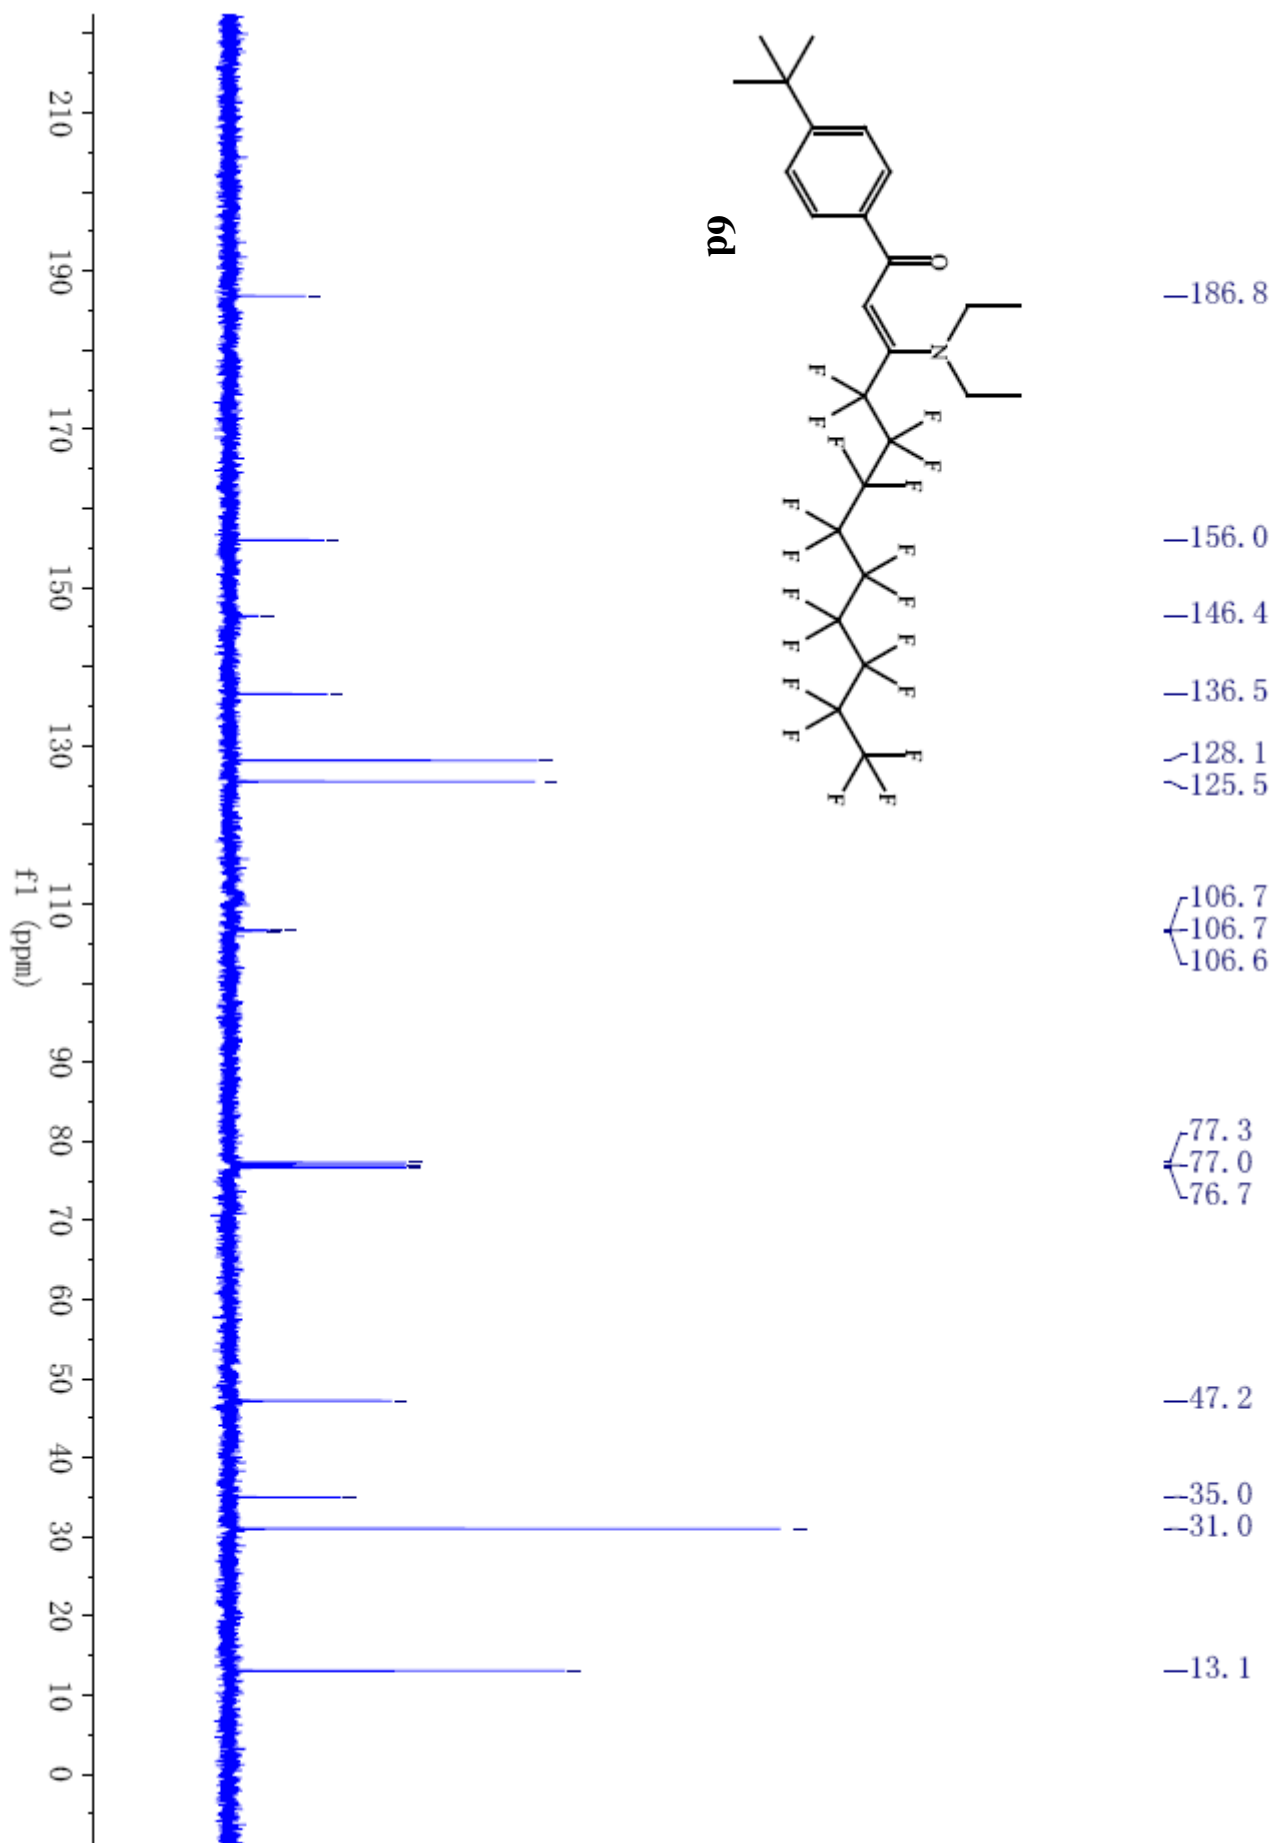

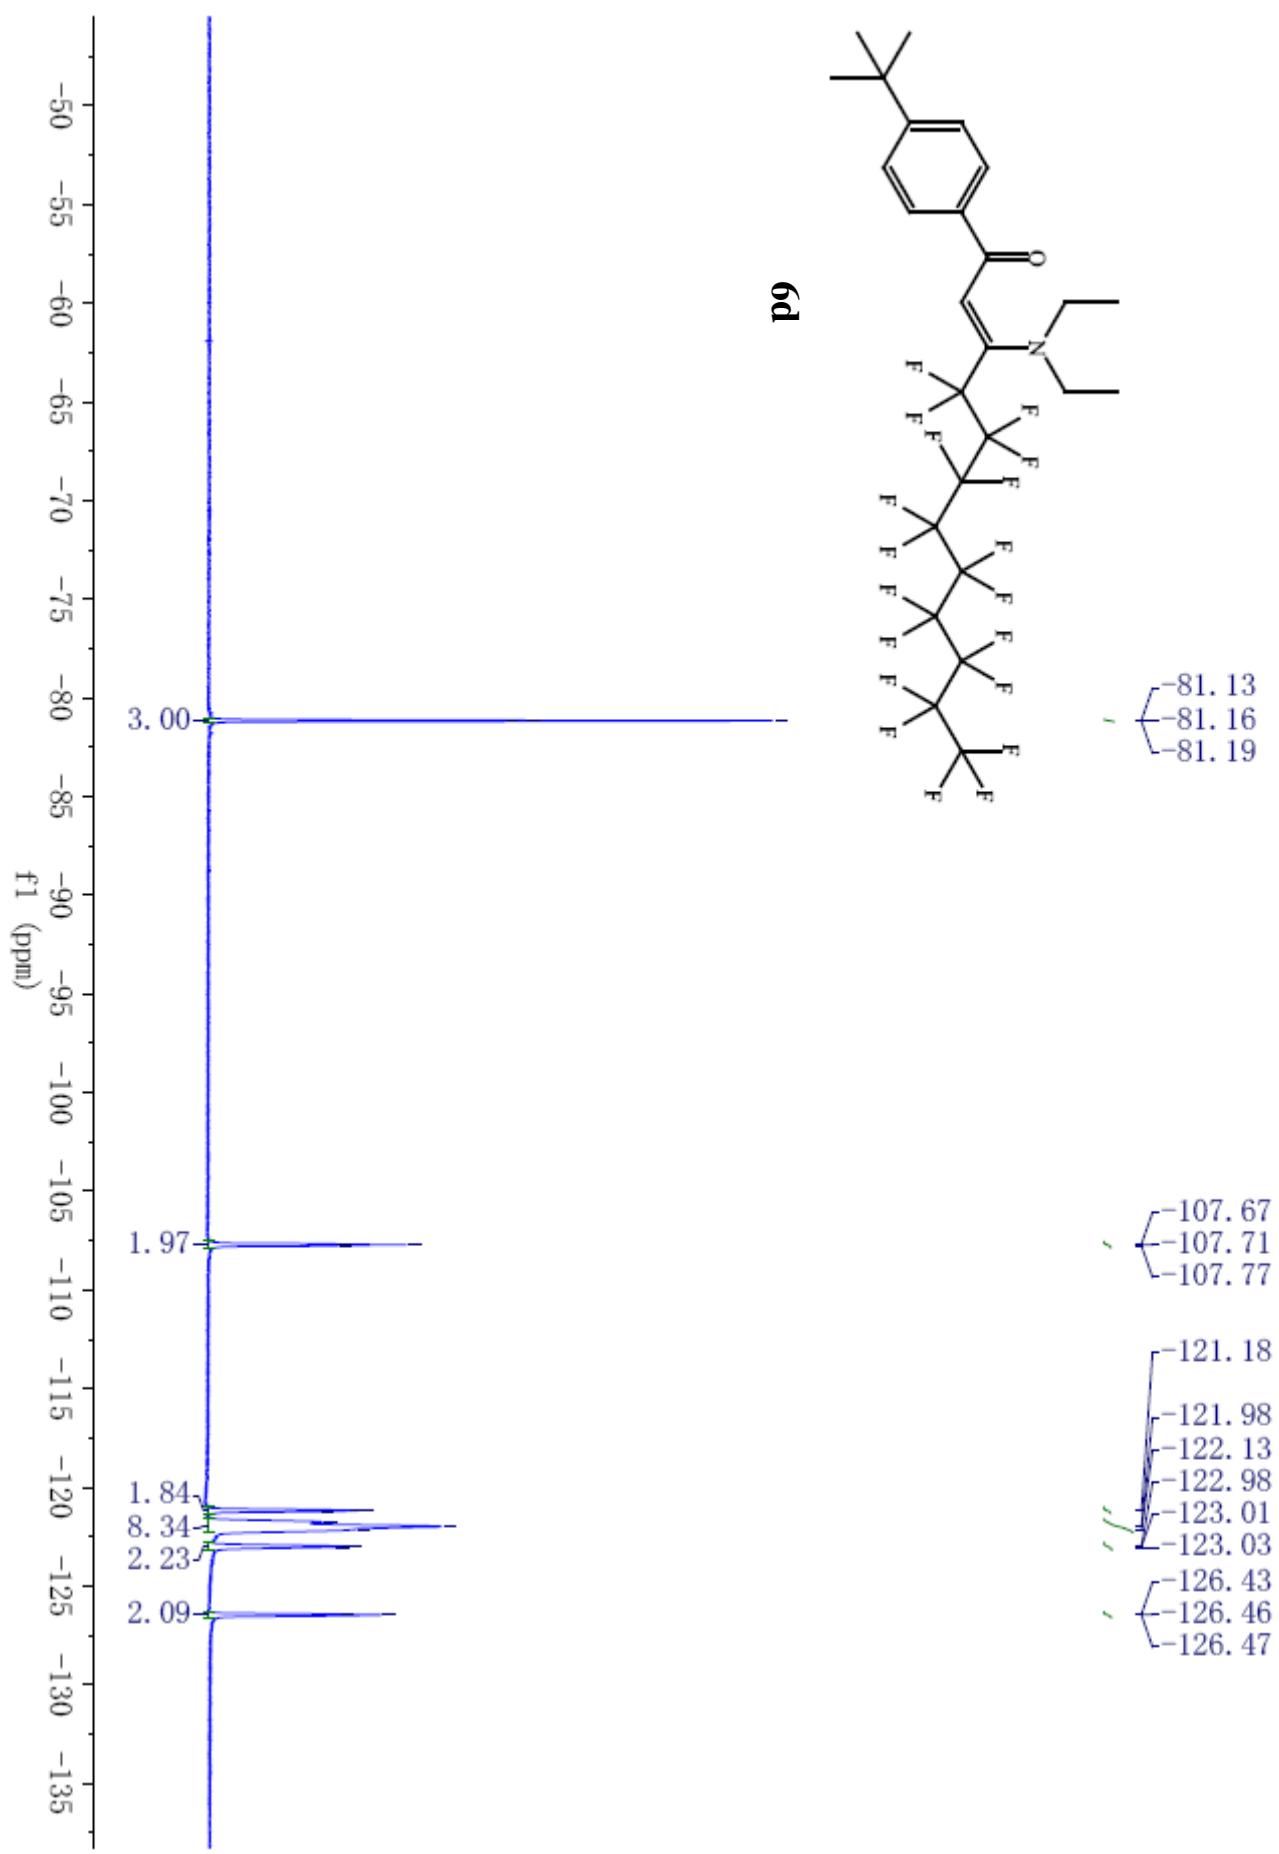

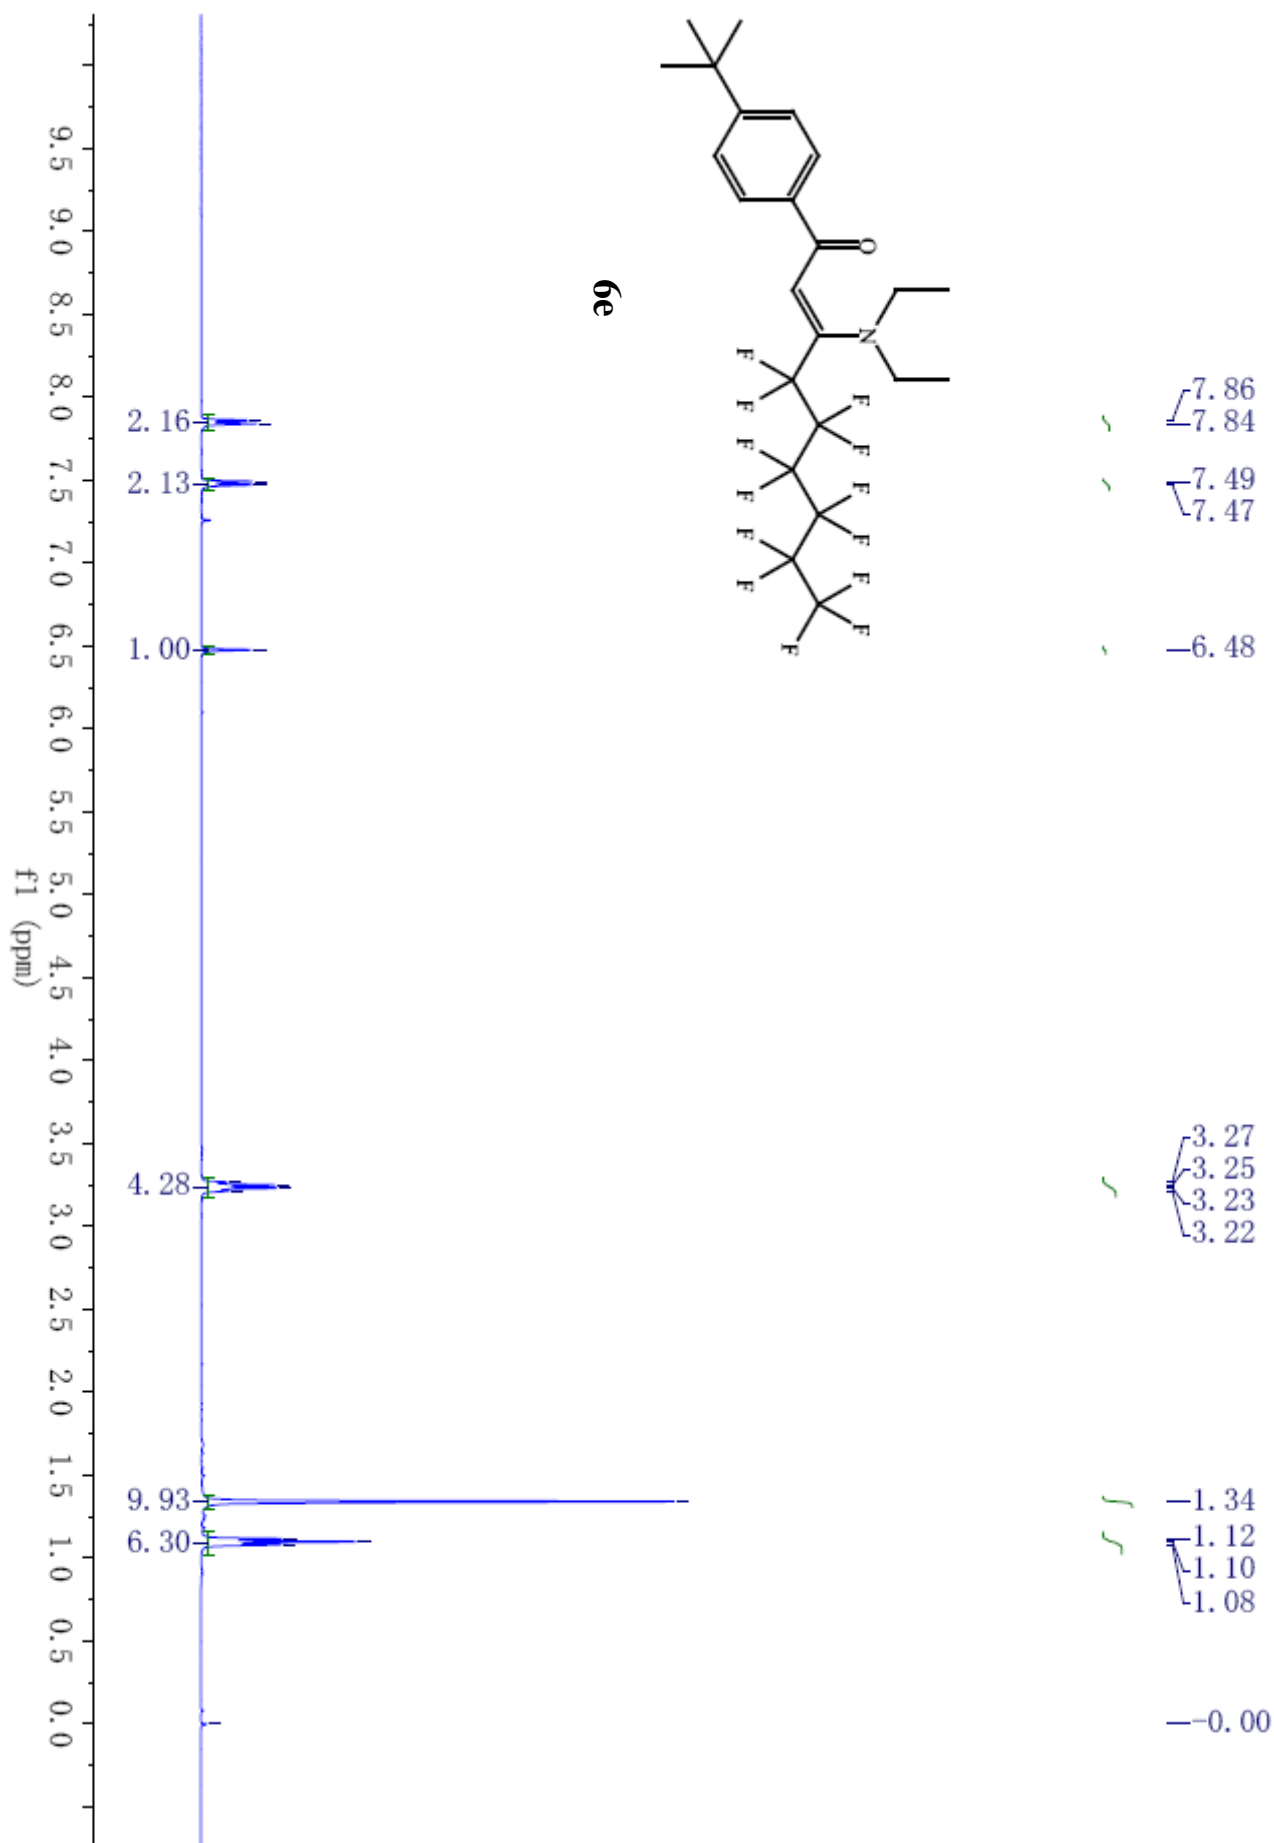

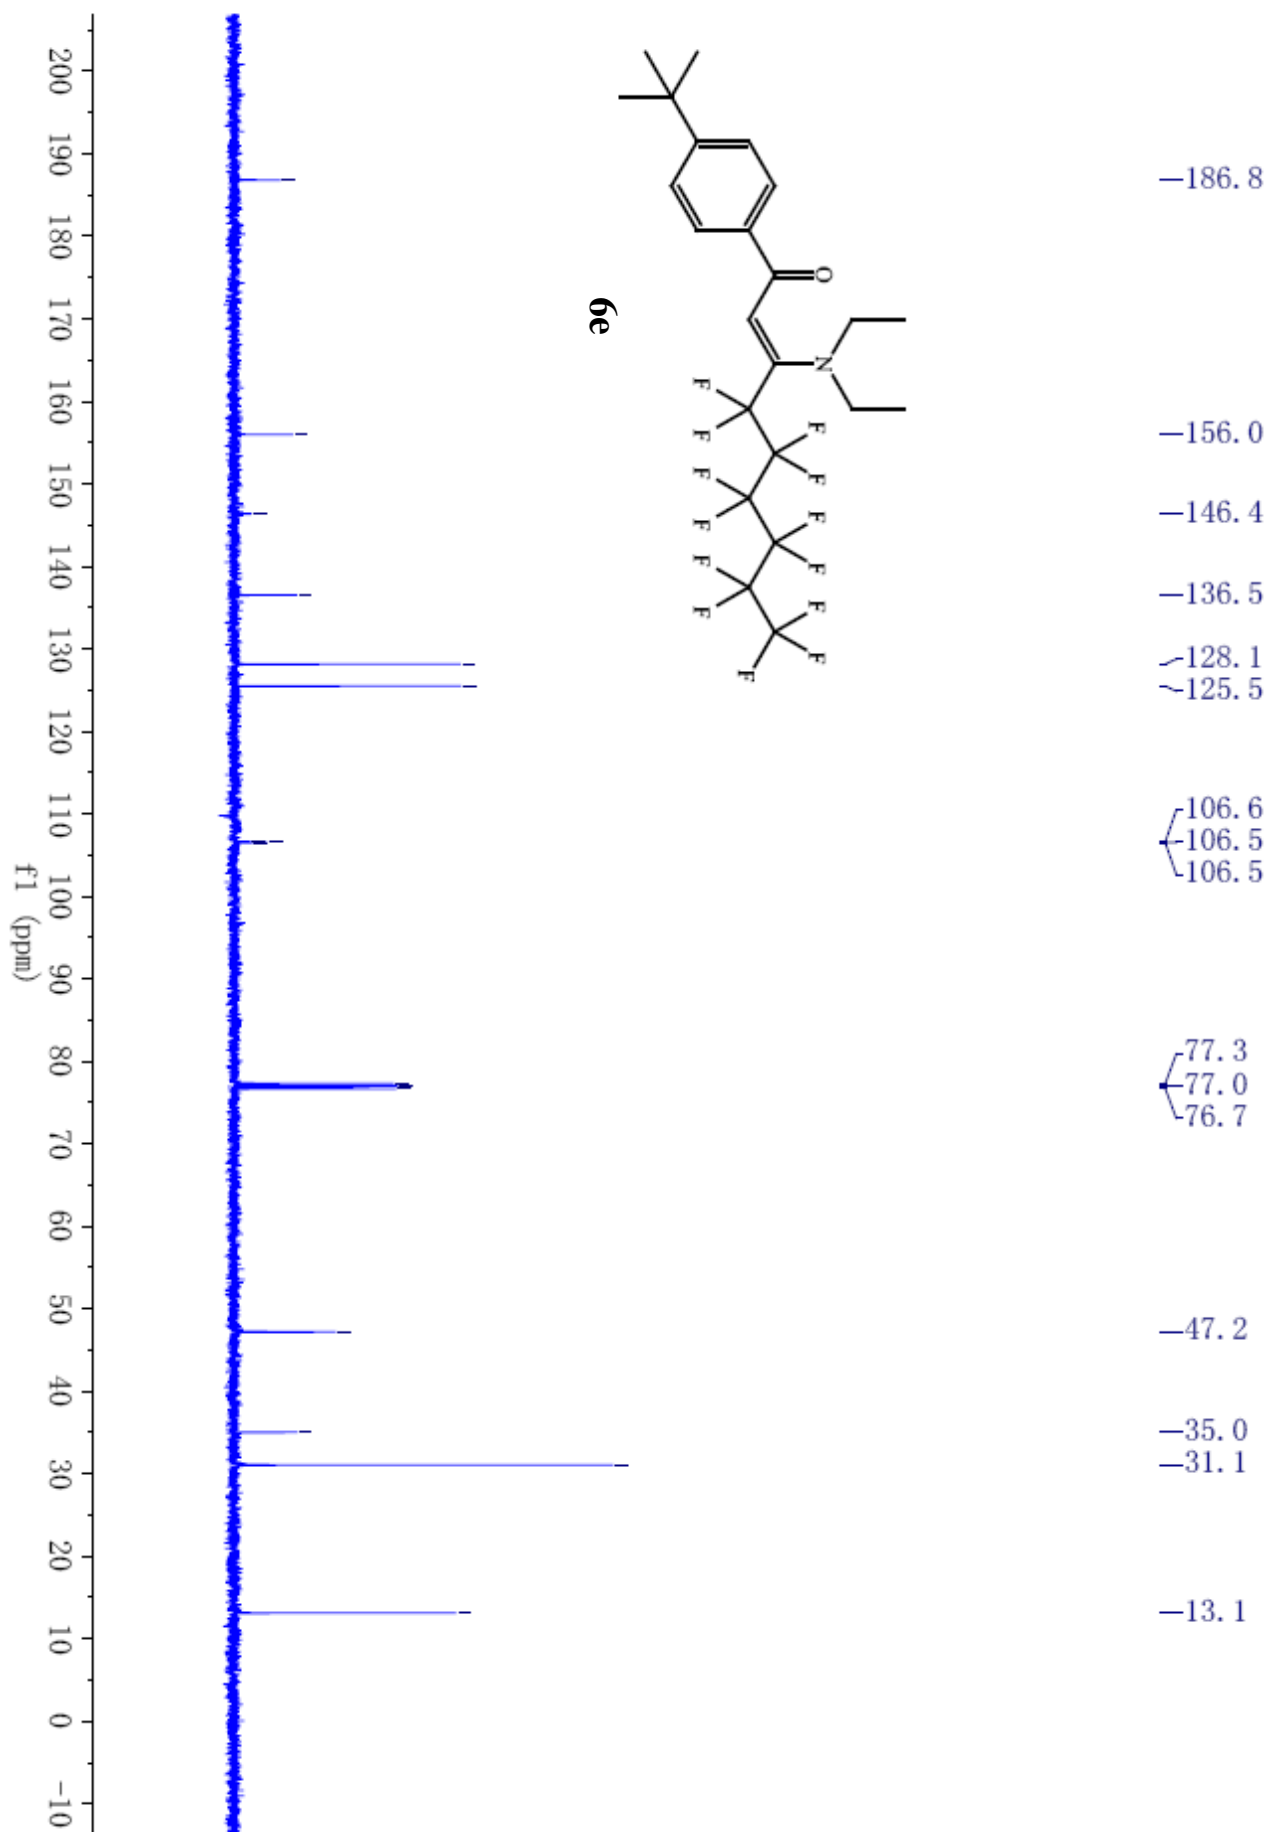

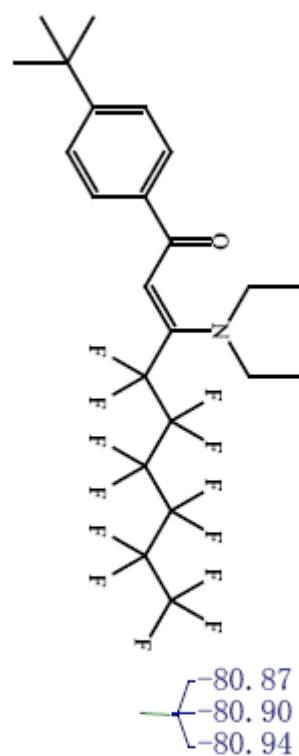

**6e**

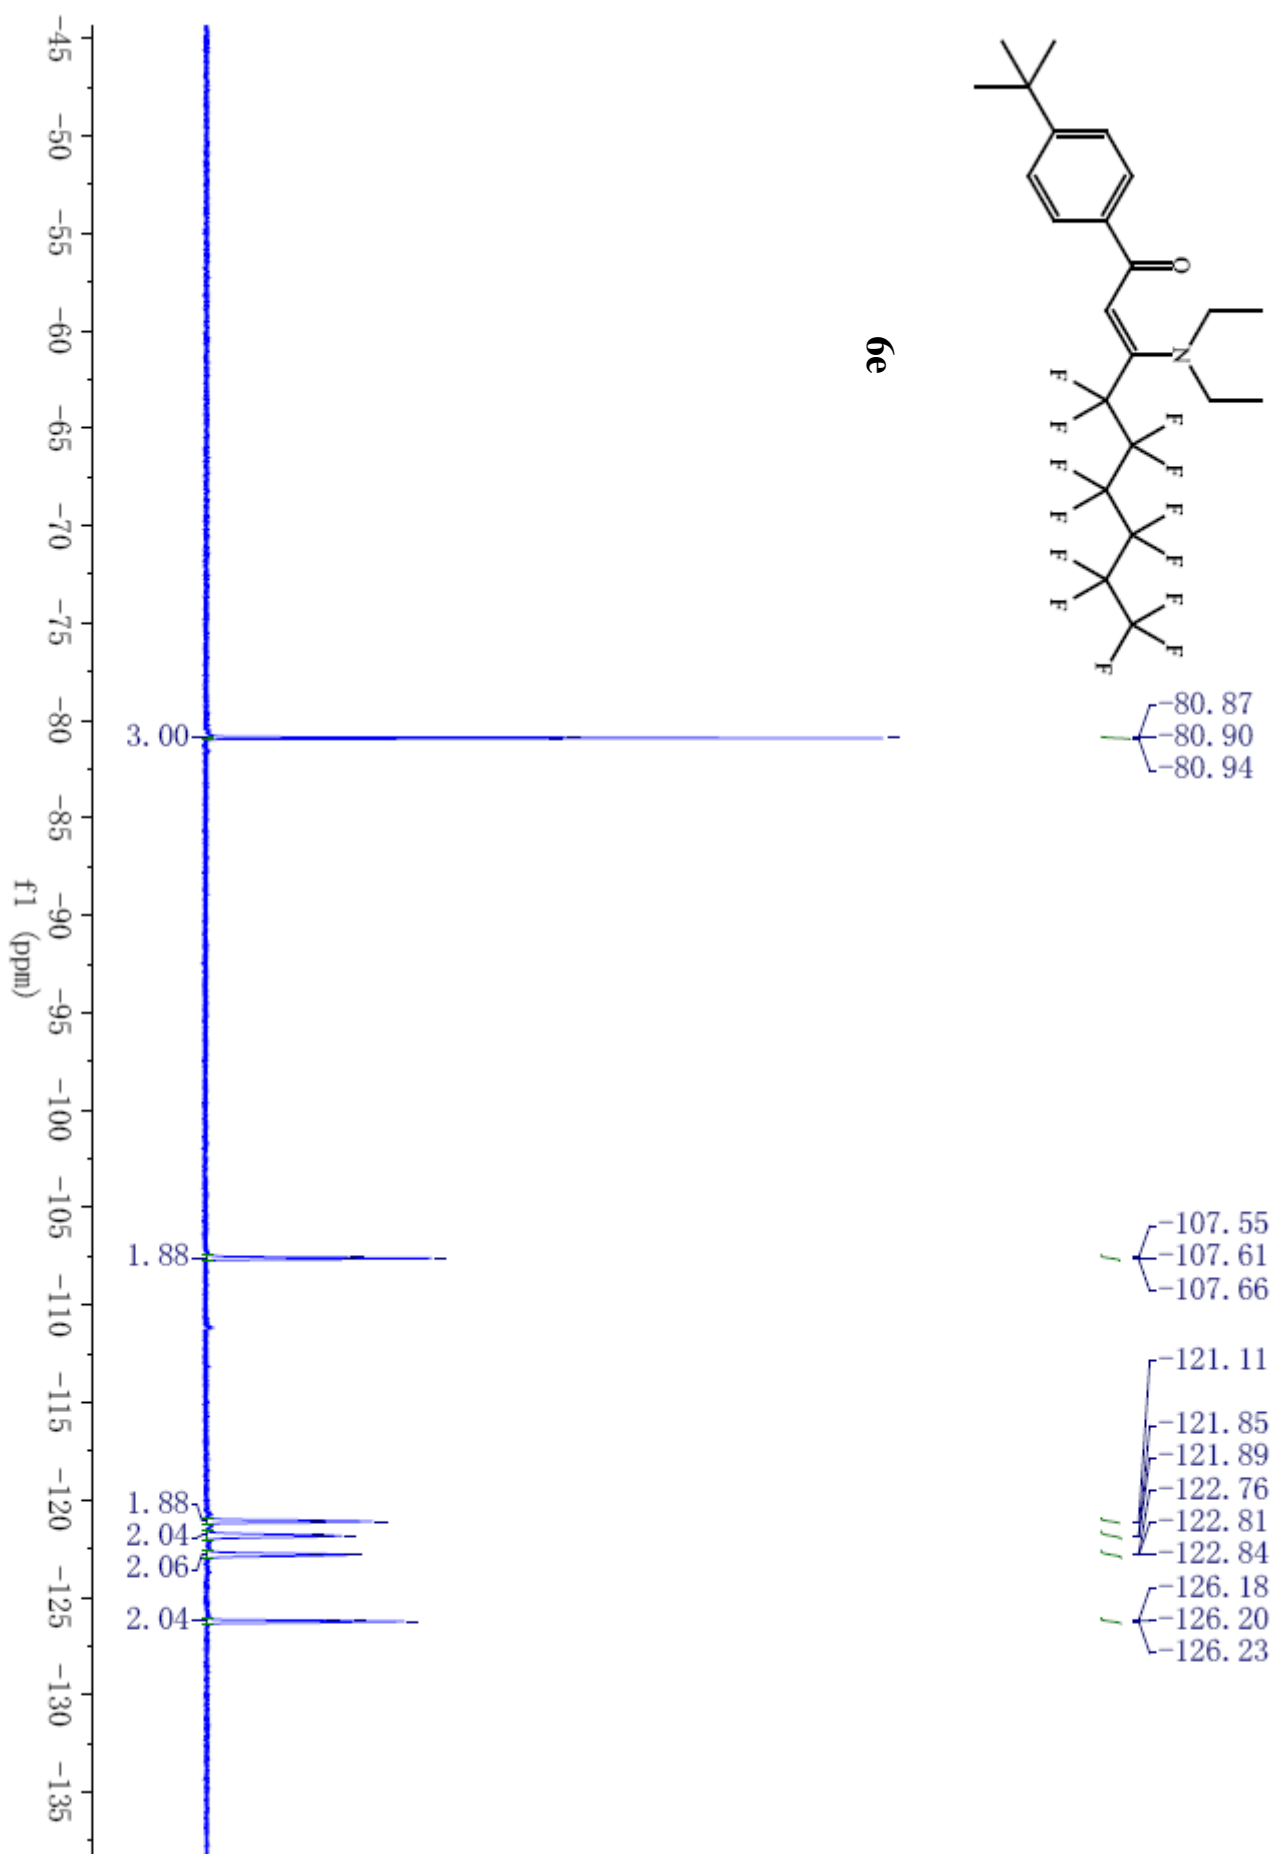

Supplement: c4cc07833k1.pdf [file c4cc07833k1.pdf]
